# Supplementary material for: Guanine is an inhibitor of c-Jun terminal kinases
Source: Research Square preprint supplement (doi:10.21203/rs.3.rs-6521885/v1), 2025-05-30
Supplement: Supplementary file 1 [file 57970626c3ed9cd458c90a5f.xlsx]

## Sheet: Phospho (STY)Sites
Proteins	Positions within proteins	Leading proteins	Protein	Protein names	Gene names	Fasta headers	Localization prob	FLR	Score diff	PEP	Score	Delta score	Score for localization	Localization prob A1	Score diff A1	PEP A1	Score A1	Localization prob A2	Score diff A2	PEP A2	Score A2	Localization prob A3	Score diff A3	PEP A3	Score A3	Localization prob A4	Score diff A4	PEP A4	Score A4	Localization prob C1	Score diff C1	PEP C1	Score C1	Localization prob C2	Score diff C2	PEP C2	Score C2	Localization prob C3	Score diff C3	PEP C3	Score C3	Localization prob C4	Score diff C4	PEP C4	Score C4	Localization prob G1	Score diff G1	PEP G1	Score G1
A0A087WQ44	1859	A0A087WQ44	A0A087WQ44		Srcap	tr|A0A087WQ44|A0A087WQ44_MOUSE Snf2-related CREBBP activator protein OS=Mus musculus OX=10090 GN=Srcap PE=1 SV=1	0.596906	0.0825855	7.67208	0.000399546	58.366	41.615	58.366
A0A087WRT4	4487	A0A087WRT4	A0A087WRT4		Fat1	tr|A0A087WRT4|A0A087WRT4_MOUSE FAT atypical cadherin 1 OS=Mus musculus OX=10090 GN=Fat1 PE=1 SV=2	0.823259	0.0282828	9.32305	0.00229449	68.972	59.784	46.206	0	0		#NUM!	0.546584	5.58282	0.0349215	43.316	0.697025	6.87465	0.00748235	56.29					0	0		#NUM!	0.663424	6.0051	0.00229449	68.972	0.823259	9.32305	0.00501988	59.709
A0A087WRT4	4274	A0A087WRT4	A0A087WRT4		Fat1	tr|A0A087WRT4|A0A087WRT4_MOUSE FAT atypical cadherin 1 OS=Mus musculus OX=10090 GN=Fat1 PE=1 SV=2	0.83599	0.0250953	7.76514	4.98136e-07	72.072	61.743	49.191
A0A1W2P884	257	A0A1W2P884	A0A1W2P884	Centrosomal protein of 85 kDa-like	Cep85l	sp|A0A1W2P884|CE85L_MOUSE Centrosomal protein of 85 kDa-like OS=Mus musculus OX=10090 GN=Cep85l PE=3 SV=1	0.467905	0.144858	0.285418	0.00150816	40.952	18.044	40.952
A0A1W2P884	262	A0A1W2P884	A0A1W2P884	Centrosomal protein of 85 kDa-like	Cep85l	sp|A0A1W2P884|CE85L_MOUSE Centrosomal protein of 85 kDa-like OS=Mus musculus OX=10090 GN=Cep85l PE=3 SV=1	0.46886	0.14441	0.285418	0.00150816	40.952	18.044	40.952
A0A1W2P884	269	A0A1W2P884	A0A1W2P884	Centrosomal protein of 85 kDa-like	Cep85l	sp|A0A1W2P884|CE85L_MOUSE Centrosomal protein of 85 kDa-like OS=Mus musculus OX=10090 GN=Cep85l PE=3 SV=1	0.466298	0.145397	0	0.00150816	40.952	18.044	40.952
A0A286YCV9	1798	A0A286YCV9	A0A286YCV9		Kif13b	tr|A0A286YCV9|A0A286YCV9_MOUSE Kinesin family member 13B OS=Mus musculus OX=10090 GN=Kif13b PE=1 SV=1	1	0	27.7093	1.9615e-17	145.52	102.71	53.037	0.5	0	4.15622e-06	117.07	0.5	0	3.88171e-13	133.15	1	21.0903	1.9615e-17	145.52	0	0		#NUM!	0.5	0	0.000874733	75.911	0.5	0	5.62827e-05	106.29	0.5	0	0.00469274	73.834					0.5	0	6.7291e-05	105.03
A0A286YCV9	1799	A0A286YCV9	A0A286YCV9		Kif13b	tr|A0A286YCV9|A0A286YCV9_MOUSE Kinesin family member 13B OS=Mus musculus OX=10090 GN=Kif13b PE=1 SV=1	1	0	27.7093	3.88171e-13	133.15	98.142	53.037	0.5	0	4.15622e-06	117.07	0.5	0	3.88171e-13	133.15	1	21.0903	0.00884153	44.089	0	0		#NUM!	0.5	0	0.000874733	75.911	0.5	0	5.62827e-05	106.29	0.5	0	0.00469274	73.834					0.5	0	6.7291e-05	105.03
A0A7N9VR94	286	A0A7N9VR94	A0A7N9VR94		Ahnak2	tr|A0A7N9VR94|A0A7N9VR94_MOUSE AHNAK nucleoprotein 2 OS=Mus musculus OX=10090 GN=Ahnak2 PE=1 SV=1	0.999877	8.66108e-06	40.0636	2.14373e-26	180.09	164.52	131.79	0.999877	40.0636	2.70798e-10	131.79	0.996253	27.272	2.14373e-26	180.09	0.996004	25.8398	1.89204e-21	166.62	0.999839	41.3531	1.15455e-17	148.62	0.999742	38.9389	8.76539e-18	142.45	0.998975	32.9281	3.14863e-14	141.37	0.999526	33.9929	1.43293e-18	155.66	0.990835	22.1136	1.33864e-09	131.06	0.984996	20.0392	3.03758e-06	118.37
A0A7N9VR94	503	A0A7N9VR94	A0A7N9VR94		Ahnak2	tr|A0A7N9VR94|A0A7N9VR94_MOUSE AHNAK nucleoprotein 2 OS=Mus musculus OX=10090 GN=Ahnak2 PE=1 SV=1	0.487855	0.136359	2.6541	0.000621289	47.745	40.947	47.745																									0.487855	2.6541	0.000621289	47.745
A0A7N9VR94	2766	A0A7N9VR94	A0A7N9VR94		Ahnak2	tr|A0A7N9VR94|A0A7N9VR94_MOUSE AHNAK nucleoprotein 2 OS=Mus musculus OX=10090 GN=Ahnak2 PE=1 SV=1	0.999968	2.17691e-06	44.8812	0.00358768	140.05	105.24	140.05	0.999968	44.8812	0.00269868	140.05	0.99719	25.5002	0.0033568	107.55	0.98965	19.8056	0.00158468	94.804	0.999244	31.2135	0.00358768	108.26	0.998522	28.2965	0.00457621	82.261	0.996095	24.067	0.00386526	109.11	0.993264	21.6863	0.00156784	95.523	0.984366	17.9908	0.0245546	68.49	0.981439	17.2325	0.032402	65.278
A0A7N9VR94	2706	A0A7N9VR94	A0A7N9VR94		Ahnak2	tr|A0A7N9VR94|A0A7N9VR94_MOUSE AHNAK nucleoprotein 2 OS=Mus musculus OX=10090 GN=Ahnak2 PE=1 SV=1	0.994348	0.000629093	22.4537	0.0193287	68.355	26.651	65.179					0.994348	22.4537	0.0312874	65.179	0.927927	11.0974	0.0233906	54.471	0	0		#NUM!					0.978772	16.6378	0.0264169	68.355	0.983293	17.6979	0.0193287	57.885
A0A7N9VR94	252	A0A7N9VR94	A0A7N9VR94		Ahnak2	tr|A0A7N9VR94|A0A7N9VR94_MOUSE AHNAK nucleoprotein 2 OS=Mus musculus OX=10090 GN=Ahnak2 PE=1 SV=1	0.999237	6.44324e-05	31.1689	1.83995e-10	130.56	116.68	53.567	0.987046	19.062	2.04251e-06	110.22	0.995559	23.5061	1.71364e-05	99.891	0.999237	31.1689	2.57307e-05	98.035	0.981443	17.2369	5.57638e-06	105.9	0.985087	19.0082	2.69372e-06	109.42	0.944037	12.5146	0.000757099	69.737	0.873355	8.4747	4.43694e-05	94.01	0.9442	12.5146	2.04251e-06	110.22	0.976169	17.0856	4.43694e-05	94.01
A0AAQ4VMW3	1020	A0AAQ4VMW3	A0AAQ4VMW3			tr|A0AAQ4VMW3|A0AAQ4VMW3_MOUSE LIM domain only 7 OS=Mus musculus OX=10090 GN=Lmo7 PE=1 SV=1	0.212537	0.24433	1.18074	0.00135817	40.8	32.533	40.8	0.212537	1.18074	0.00135817	40.8
A0AAQ4VMW3	822	A0AAQ4VMW3	A0AAQ4VMW3			tr|A0AAQ4VMW3|A0AAQ4VMW3_MOUSE LIM domain only 7 OS=Mus musculus OX=10090 GN=Lmo7 PE=1 SV=1	0.973033	0.00322132	15.5729	0.00180573	74.962	59.08	74.962	0	0		#NUM!	0.964134	14.2945	0.0335439	46.39	0.973033	15.5729	0.00180573	74.962	0.880205	8.66146	0.0381529	44.299	0.910727	10.0867	0.0490315	40.352	0.938434	11.8307	0.00536018	67.385	0.916154	10.3849	0.0335439	46.39
A0AAQ4VMW3	194	A0AAQ4VMW3	A0AAQ4VMW3			tr|A0AAQ4VMW3|A0AAQ4VMW3_MOUSE LIM domain only 7 OS=Mus musculus OX=10090 GN=Lmo7 PE=1 SV=1	0.901096	0.0143462	11.5296	0.00252956	78.078	57.494	66.965																	0.879144	12.3242	0.0441461	42.813	0.770727	6.40143	0.00252956	78.078	0.901096	11.5296	0.00509039	66.965
A0AAQ4VMW3	1547	A0AAQ4VMW3	A0AAQ4VMW3			tr|A0AAQ4VMW3|A0AAQ4VMW3_MOUSE LIM domain only 7 OS=Mus musculus OX=10090 GN=Lmo7 PE=1 SV=1	0.999299	5.71327e-05	31.8231	5.89989e-08	106.69	93.753	106.69													0.942231	14.6973	0.000602568	65.454	0.98099	17.7784	0.00157285	53.998	0.999299	31.8231	5.89989e-08	106.69					0.969637	17.3728	0.000265592	76.186	0.578533	4.27331	0.003783	46.982
A1A5B6	560	A1A5B6	A1A5B6	TBC1 domain family member 25	Tbc1d25	sp|A1A5B6|TBC25_MOUSE TBC1 domain family member 25 OS=Mus musculus OX=10090 GN=Tbc1d25 PE=1 SV=1	1	0	134.73	1.82644e-19	176.78	137.6	153.34	1	130.948	6.34132e-12	153.95	1	154.29	2.1528e-19	175.74	1	125.416	8.39536e-11	142.89	1	112.591	6.05001e-11	134.98	1	75.9407	1.10414e-05	111.63	1	154.29	1.82644e-19	176.78	1	129.22	5.1881e-12	155.47	1	91.2327	5.70231e-06	116.03	1	83.6516	0.0012042	123.67
A1L3P4	700	A1L3P4	A1L3P4	Sodium/hydrogen exchanger 6	Slc9a6	sp|A1L3P4|SL9A6_MOUSE Sodium/hydrogen exchanger 6 OS=Mus musculus OX=10090 GN=Slc9a6 PE=1 SV=1	0.969424	0.00375265	15.0227	2.02606e-44	146.17	121.66	104.83	0.969361	15.0026	2.84581e-36	140.04	0.965296	14.4436	2.84813e-23	121.26	0.789771	5.93586	7.58641e-12	98.326	0.95946	13.7438	2.26656e-22	116.34	0.969424	15.0227	1.37454e-16	104.83	0.865237	8.11005	3.46522e-22	114.49	0.91735	10.8716	9.92997e-12	97.304	0.934093	11.7726	4.28615e-22	112.74	0.922313	10.7485	2.02606e-44	146.17
A2A484	674	A2A484	A2A484		Zmynd8	tr|A2A484|A2A484_MOUSE Zinc finger, MYND-type containing 8 OS=Mus musculus OX=10090 GN=Zmynd8 PE=1 SV=1	1	0	23.4703	0.00861143	44.539	38.376	44.539									1	23.4703	0.00861143	44.539
A2A484	410	A2A484	A2A484		Zmynd8	tr|A2A484|A2A484_MOUSE Zinc finger, MYND-type containing 8 OS=Mus musculus OX=10090 GN=Zmynd8 PE=1 SV=1	0.914194	0.0119566	10.2752	0.00153866	78.964	61.225	62.732	0.664072	2.95969	0.0246396	52.891	0.914194	10.2752	0.0121067	62.732	0.905369	9.80794	0.00153866	78.964	0.817096	6.5005	0.00997215	76.522
A2A484	429	A2A484	A2A484		Zmynd8	tr|A2A484|A2A484_MOUSE Zinc finger, MYND-type containing 8 OS=Mus musculus OX=10090 GN=Zmynd8 PE=1 SV=1	0.921017	0.0107988	10.6674	0.00389663	85.958	56.215	79.036	0.898767	9.48323	0.00693918	74.944	0.921017	10.6674	0.00389663	79.036	0.845872	7.39424	0.00406301	85.958									0.827056	6.79629	0.0433673	52.693	0.804145	6.13401	0.103634	42.243	0.894961	9.30453	0.0145886	70.942
A2A4P0	484	A2A4P0	A2A4P0	ATP-dependent RNA helicase DHX8	Dhx8	sp|A2A4P0|DHX8_MOUSE ATP-dependent RNA helicase DHX8 OS=Mus musculus OX=10090 GN=Dhx8 PE=2 SV=1	0.996373	0.000386279	24.3883	0.00124122	80.469	57.397	70.089									0.734911	4.42843	0.00206672	60.401	0.996373	24.3883	0.00717485	70.089	0.740723	4.55892	0.00124122	67.964	0.734911	4.42843	0.00206672	60.401	0.734911	4.42843	0.00270627	57.136	0.953842	13.1522	0.0896462	44.511	0	0		#NUM!
A2A5R2	218	A2A5R2	A2A5R2	Brefeldin A-inhibited guanine nucleotide-exchange protein 2	Arfgef2	sp|A2A5R2|BIG2_MOUSE Brefeldin A-inhibited guanine nucleotide-exchange protein 2 OS=Mus musculus OX=10090 GN=Arfgef2 PE=1 SV=1	0.984646	0.00182633	19.8972	6.98901e-06	73.088	55.437	73.088					0.777724	5.89973	0.00925413	44.893					0.984646	19.8972	6.98901e-06	73.088
A2A5R2	227	A2A5R2	A2A5R2	Brefeldin A-inhibited guanine nucleotide-exchange protein 2	Arfgef2	sp|A2A5R2|BIG2_MOUSE Brefeldin A-inhibited guanine nucleotide-exchange protein 2 OS=Mus musculus OX=10090 GN=Arfgef2 PE=1 SV=1	0.966029	0.00422782	14.5544	1.38064e-35	132.6	122.62	123.22	0.564632	1.15602	8.03384e-06	75.261	0.966029	14.5544	1.62708e-28	123.22	0.947951	12.604	1.38064e-35	132.6	0.933024	11.4195	6.98901e-06	73.088	0.728048	4.47964	2.48508e-05	66.828	0.896085	9.35691	1.20309e-16	103.35	0.924414	10.8887	2.172e-05	67.658	0.564711	1.65798	0.000179194	61.538	0.736943	4.97049	0.000659861	54.466
A2A654	1312	A2A654	A2A654		Bptf	tr|A2A654|A2A654_MOUSE Bromodomain PHD finger transcription factor OS=Mus musculus OX=10090 GN=Bptf PE=1 SV=1	0.999972	1.85796e-06	45.5728	6.39891e-05	106.26	74.779	106.26					0.999972	45.5728	6.39891e-05	106.26	0.999966	44.7151	0.000380845	84.892	0	0		#NUM!	0.967934	14.798	0.00970174	59.155	0	0		#NUM!	0	0		#NUM!
A2A654	1388	A2A654	A2A654		Bptf	tr|A2A654|A2A654_MOUSE Bromodomain PHD finger transcription factor OS=Mus musculus OX=10090 GN=Bptf PE=1 SV=1	0.995194	0.000529331	23.2735	0.000221426	94.717	75.937	63.364	0.970056	15.269	0.0136635	60.937	0.954308	13.811	0.00582017	55.724	0.912834	11.8976	0.00491072	55.724	0.995194	23.2735	0.00536846	63.364	0.769523	6.30101	0.00947875	42.813	0.85689	7.93277	0.00326553	54.281	0	0		#NUM!	0.853345	8.04762	0.0551616	45.115	0.82136	7.02676	0.0358222	49.216
A2A6A1	1037	A2A6A1	A2A6A1	G patch domain-containing protein 8	Gpatch8	sp|A2A6A1|GPTC8_MOUSE G patch domain-containing protein 8 OS=Mus musculus OX=10090 GN=Gpatch8 PE=1 SV=1	0.782711	0.0372849	5.6127	0.0014918	76.522	63.486	76.522	0.782711	5.6127	0.0014918	76.522																					0	0		#NUM!
A2A6A1	1039	A2A6A1	A2A6A1	G patch domain-containing protein 8	Gpatch8	sp|A2A6A1|GPTC8_MOUSE G patch domain-containing protein 8 OS=Mus musculus OX=10090 GN=Gpatch8 PE=1 SV=1	0.99336	0.000736497	21.8132	1.92105e-05	110.8	100.89	110.8	0.708948	6.32324	0.0119793	42.083	0.958995	13.8089	0.00550291	57.425	0.900079	9.74649	0.00147912	76.588	0.855774	7.89858	0.00322159	58.674					0.99336	21.8132	1.92105e-05	110.8	0	0		#NUM!	0.864584	9.50406	0.010961	57.802
A2A6T1	179	A2A6T1	A2A6T1	Cerebellar degeneration-related protein 2-like	Cdr2l	sp|A2A6T1|CDR2L_MOUSE Cerebellar degeneration-related protein 2-like OS=Mus musculus OX=10090 GN=Cdr2l PE=1 SV=1	0.676792	0.0610033	4.20999	1.18064e-05	84.573	74.76	84.573
A2A716	267	A2A716	A2A716	Oxysterol-binding protein	Osbpl7	tr|A2A716|A2A716_MOUSE Oxysterol-binding protein OS=Mus musculus OX=10090 GN=Osbpl7 PE=1 SV=2	0.999263	6.17593e-05	31.3218	0.00014123	97.813	74.441	97.813					0.999263	31.3218	0.00014123	97.813
A2A791	121	A2A791	A2A791	Zinc finger MYM-type protein 4	Zmym4	sp|A2A791|ZMYM4_MOUSE Zinc finger MYM-type protein 4 OS=Mus musculus OX=10090 GN=Zmym4 PE=1 SV=1	1	0	67.3254	2.53184e-27	134.31	134.31	107.98	1	44.0009	3.26809e-05	66.613	1	71.2609	4.33564e-15	115.88	1	40.6208	0.000120609	58.938	1	47.8584	9.60655e-07	83.992	1	55.0076	5.28022e-15	114.57	1	68.4055	5.62203e-09	97.395	1	64.3491	6.51417e-14	114.57	1	41.7939	5.77458e-06	75.524	1	47.8584	2.61786e-08	91.416
A2A7S8	543	A2A7S8	A2A7S8	NHS-like protein 3	Nhsl3	sp|A2A7S8|NHSL3_MOUSE NHS-like protein 3 OS=Mus musculus OX=10090 GN=Nhsl3 PE=1 SV=1	1	0	15.0979	0.000830143	52.061	41.223	52.061																									1	10.2723	0.00159459	49.125
A2A7S8	909	A2A7S8	A2A7S8	NHS-like protein 3	Nhsl3	sp|A2A7S8|NHSL3_MOUSE NHS-like protein 3 OS=Mus musculus OX=10090 GN=Nhsl3 PE=1 SV=1	1	0	19.8505	0.000109572	78.324	47.355	40.81													1	24.199	0.000109572	76.417	1	11.8505	0.0114361	49.089					1	37.0872	0.00020693	78.324	1	8.8968	0.000233498	68.88	1	11.0446	0.00708799	53.625
A2AAJ9	7815	A2AAJ9	A2AAJ9	Obscurin	Obscn	sp|A2AAJ9|OBSCN_MOUSE Obscurin OS=Mus musculus OX=10090 GN=Obscn PE=1 SV=3	0.286675	0.220614	0	0.00559744	49.343	21.847	43.799	0.286675	0	0.0120669	43.799
A2AAJ9	7818	A2AAJ9	A2AAJ9	Obscurin	Obscn	sp|A2AAJ9|OBSCN_MOUSE Obscurin OS=Mus musculus OX=10090 GN=Obscn PE=1 SV=3	0.286675	0.220518	0	0.00559744	49.343	21.847	43.799	0.286675	0	0.0120669	43.799
A2AAJ9	7819	A2AAJ9	A2AAJ9	Obscurin	Obscn	sp|A2AAJ9|OBSCN_MOUSE Obscurin OS=Mus musculus OX=10090 GN=Obscn PE=1 SV=3	0.286675	0.220422	0	0.00559744	49.343	21.847	43.799	0.286675	0	0.0120669	43.799
A2AAY5	528	A2AAY5	A2AAY5	SH3 and PX domain-containing protein 2B	Sh3pxd2b	sp|A2AAY5|SPD2B_MOUSE SH3 and PX domain-containing protein 2B OS=Mus musculus OX=10090 GN=Sh3pxd2b PE=1 SV=1	0.999794	1.56559e-05	36.8604	1.37602e-14	138.55	112.99	100.97	0.996101	24.0732	8.29277e-06	102.58	0.999284	31.4487	1.0479e-05	106.93	0.999794	36.8604	1.21579e-05	100.97									0.998066	27.1264	1.37602e-14	138.55	0.999232	31.1448	1.37602e-14	138.55
A2AEV7	342	A2AEV7	A2AEV7	Coiled-coil domain-containing protein 120	Ccdc120	sp|A2AEV7|CC120_MOUSE Coiled-coil domain-containing protein 120 OS=Mus musculus OX=10090 GN=Ccdc120 PE=1 SV=1	0.746687	0.0442282	9.32574	0.0108052	45.79	11.105	45.79									0.746687	9.32574	0.0108052	45.79	0	0		#NUM!
A2AF47	1237	A2AF47	A2AF47	Dedicator of cytokinesis protein 11	Dock11	sp|A2AF47|DOC11_MOUSE Dedicator of cytokinesis protein 11 OS=Mus musculus OX=10090 GN=Dock11 PE=1 SV=1	0.590194	0.0846208	2.509	4.43324e-05	63.403	41.935	63.403																									0.419807	0	0.00115669	41.914
A2AF47	1240	A2AF47	A2AF47	Dedicator of cytokinesis protein 11	Dock11	sp|A2AF47|DOC11_MOUSE Dedicator of cytokinesis protein 11 OS=Mus musculus OX=10090 GN=Dock11 PE=1 SV=1	0.436884	0.158804	0	0.000141212	51.632	41.513	51.632																									0.419807	0	0.00115669	41.914
A2AG58	78	A2AG58	A2AG58	BCLAF1 and THRAP3 family member 3	Bclaf3	sp|A2AG58|BCLA3_MOUSE BCLAF1 and THRAP3 family member 3 OS=Mus musculus OX=10090 GN=Bclaf3 PE=1 SV=1	0.996897	0.000329608	26.2915	1.42726e-12	122.18	119.54	122.18					0.951478	15.8228	3.23163e-05	93.583	0.988074	20.2894	1.98871e-07	105.22	0.944164	13.7577	0.000979224	65.207	0.972004	19.2902	0.0021814	54.559	0.941188	14.2796	0.000533892	73.981	0.996897	26.2915	1.42726e-12	122.18
A2AG58	80	A2AG58	A2AG58	BCLAF1 and THRAP3 family member 3	Bclaf3	sp|A2AG58|BCLA3_MOUSE BCLAF1 and THRAP3 family member 3 OS=Mus musculus OX=10090 GN=Bclaf3 PE=1 SV=1	0.99929	5.86537e-05	32.9433	1.42726e-12	122.18	119.54	122.18					0.986078	21.7557	3.23163e-05	93.583	0.997608	27.4548	1.98871e-07	105.22	0.983115	19.6063	0.000979224	65.207	0.979397	21.2886	0.0021814	54.559	0.985981	20.7336	0.000533892	73.981	0.99929	32.9433	1.42726e-12	122.18
A2AG58	205	A2AG58	A2AG58	BCLAF1 and THRAP3 family member 3	Bclaf3	sp|A2AG58|BCLA3_MOUSE BCLAF1 and THRAP3 family member 3 OS=Mus musculus OX=10090 GN=Bclaf3 PE=1 SV=1	0.994632	0.000590679	24.7275	6.10197e-15	167.3	151.42	167.3					0.686293	3.96964	2.50506e-10	127.17	0.766534	5.39986	8.72455e-05	96.64	0.845698	9.605	3.53989e-05	109.16	0.923124	11.8571	1.59404e-08	122.42	0.854612	8.73874	0.000103255	100.22	0.967911	15.8423	1.11834e-08	125.28	0.90359	10.8503	1.11834e-08	125.28	0.987081	19.8728	8.38347e-11	142.91
A2AGH6	636	A2AGH6	A2AGH6	Mediator of RNA polymerase II transcription subunit 12	Med12	sp|A2AGH6|MED12_MOUSE Mediator of RNA polymerase II transcription subunit 12 OS=Mus musculus OX=10090 GN=Med12 PE=1 SV=1	0.938039	0.00816386	11.801	8.05924e-05	58.776	51.064	58.498					0.578311	1.37169	9.43197e-05	57.613	0.738274	4.50372	0.00118233	55.67													0.800616	6.03735	0.00216648	40.428	0	0		#NUM!
A2AHC3	1069	A2AHC3	A2AHC3	Calmodulin-regulated spectrin-associated protein 1	Camsap1	sp|A2AHC3|CAMP1_MOUSE Calmodulin-regulated spectrin-associated protein 1 OS=Mus musculus OX=10090 GN=Camsap1 PE=1 SV=1	0.979599	0.00235676	16.814	1.90392e-07	100.39	92.397	96.379	0.822169	6.64955	0.000672548	57.009	0.979599	16.814	7.72629e-07	96.379	0.83557	7.06002	0.000218299	67.866	0.952416	13.0136	1.90392e-07	100.39					0.956587	13.4311	0.000783789	55.575	0.961262	13.9471	0.000491836	59.339					0.889008	9.03613	0.000206058	68.49
A2AHC3	505	A2AHC3	A2AHC3	Calmodulin-regulated spectrin-associated protein 1	Camsap1	sp|A2AHC3|CAMP1_MOUSE Calmodulin-regulated spectrin-associated protein 1 OS=Mus musculus OX=10090 GN=Camsap1 PE=1 SV=1	0.331765	0.201953	2.24162	0.0119557	40.112	37.426	40.112																	0.331765	2.24162	0.0119557	40.112
A2AHC3	560	A2AHC3	A2AHC3	Calmodulin-regulated spectrin-associated protein 1	Camsap1	sp|A2AHC3|CAMP1_MOUSE Calmodulin-regulated spectrin-associated protein 1 OS=Mus musculus OX=10090 GN=Camsap1 PE=1 SV=1	0.499992	0.12319	0	0.0136707	72.321	59.284	72.321	0.499992	0	0.0136707	72.321	0	0		#NUM!	0.499608	0	0.0745019	54.09	0.499897	0	0.035634	60.657	0.499866	0	0.0247199	67.234	0.499849	0	0.0633194	55.98	0	0		#NUM!	0.499245	0	0.0648324	55.724	0.499701	0	0.0780501	53.491
A2AI08	184	A2AI08	A2AI08	Taperin	Tprn	sp|A2AI08|TPRN_MOUSE Taperin OS=Mus musculus OX=10090 GN=Tprn PE=1 SV=1	0.999944	4.29287e-06	42.529	0.00272422	76.927	31.766	76.927	0.977847	16.4483	0.0233724	54.486					0.999944	42.529	0.00272422	76.927	0	0		#NUM!	0.993857	22.0898	0.0140624	62.466													0.988643	19.3977	0.0222847	55.401
A2AI08	457	A2AI08	A2AI08	Taperin	Tprn	sp|A2AI08|TPRN_MOUSE Taperin OS=Mus musculus OX=10090 GN=Tprn PE=1 SV=1	0.887977	0.0163608	8.99093	8.90257e-05	56.049	49.822	56.049					0	0		#NUM!	0.802433	6.08694	0.000785912	43.831					0.574315	1.30062	0.000189705	50.645	0.627447	2.26389	9.82625e-05	55.336	0.758934	4.98068	0.000940571	42.064
A2AIV2	1577	A2AIV2	A2AIV2	Protein virilizer homolog	Virma	sp|A2AIV2|VIR_MOUSE Protein virilizer homolog OS=Mus musculus OX=10090 GN=Virma PE=1 SV=1	0.979909	0.00232928	17.5923	3.32918e-21	168.31	145.59	168.31	0.979909	17.5923	3.32918e-21	168.31									0.656659	2.86561	0.000107565	90.614									0.948226	12.9925	1.74e-05	113.76	0.879884	8.76399	5.85863e-17	143.98
A2AIV2	1578	A2AIV2	A2AIV2	Protein virilizer homolog	Virma	sp|A2AIV2|VIR_MOUSE Protein virilizer homolog OS=Mus musculus OX=10090 GN=Virma PE=1 SV=1	0.971491	0.0034123	15.3255	5.49235e-13	134.21	104.87	132.5	0.684901	3.4646	6.83498e-06	111.63	0.96461	14.3574	1.97237e-08	126.51	0.971491	15.3255	5.00704e-11	132.5	0.889817	12.0823	1.35716e-08	128.21	0.825231	7.49497	2.11961e-08	126.1	0.877007	11.5419	8.9149e-06	117.72	0.543584	0.801088	7.47271e-05	87.719	0.495285	0	0.000771577	80.245	0.686487	3.42623	2.85084e-08	124.07
A2AIV2	1582	A2AIV2	A2AIV2	Protein virilizer homolog	Virma	sp|A2AIV2|VIR_MOUSE Protein virilizer homolog OS=Mus musculus OX=10090 GN=Virma PE=1 SV=1	0.458449	0.149353	0	2.85084e-08	124.07	101.35	124.07																																	0.458449	0	2.85084e-08	124.07
A2AIV2	133	A2AIV2	A2AIV2	Protein virilizer homolog	Virma	sp|A2AIV2|VIR_MOUSE Protein virilizer homolog OS=Mus musculus OX=10090 GN=Virma PE=1 SV=1	0.492052	0.134667	0	1.34216e-05	75.654	70.524	54.375					0.4383	0	0.00109405	42.571	0.491719	0	1.34216e-05	75.654					0.434184	0	0.00063582	46.66					0.438301	0	0.00086716	44.596					0.475287	0	2.9111e-05	69.094
A2AIV2	138	A2AIV2	A2AIV2	Protein virilizer homolog	Virma	sp|A2AIV2|VIR_MOUSE Protein virilizer homolog OS=Mus musculus OX=10090 GN=Virma PE=1 SV=1	0.629236	0.0737219	2.3022	1.68421e-07	84.962	82.512	84.962					0.4383	0	0.00109405	42.571	0.491719	0	1.34216e-05	75.654	0.563084	1.48334	0.000106474	54.375	0.434184	0	0.00063582	46.66	0.629236	2.3022	1.68421e-07	84.962	0.438301	0	0.00086716	44.596	0.584951	1.6693	4.76684e-05	61.228	0.475287	0	2.9111e-05	69.094
A2AJ88	379	A2AJ88	A2AJ88	Patatin-like phospholipase domain-containing protein 7	Pnpla7	sp|A2AJ88|PLPL7_MOUSE Patatin-like phospholipase domain-containing protein 7 OS=Mus musculus OX=10090 GN=Pnpla7 PE=1 SV=1	0.831279	0.026291	7.0846	0.000492486	66.045	54.745	66.045																					0.801997	6.33594	0.0015238	52.03	0.831279	7.0846	0.000492486	66.045
A2AJD1;Q80XI7	92;92	A2AJD1	A2AJD1	Vomeromodulin	Bpifb9b;Bpifb9a	tr|A2AJD1|A2AJD1_MOUSE BPI fold containing family B, member 9B OS=Mus musculus OX=10090 GN=Bpifb9b PE=1 SV=1;sp|Q80XI7|VOME_MOUSE Vomeromodulin OS=Mus musculus OX=10090 GN=Bpifb9a PE=1 SV=1	0.547596	0.0997993	4.65142	0.000511245	47.429	24.85	47.429													0.529586	3.40252	0.000545485	47.104													0.536939	3.52829	0.00152128	40.544	0.547596	4.65142	0.000511245	47.429
A2AJI0	114	A2AJI0	A2AJI0	MAP7 domain-containing protein 1	Map7d1	sp|A2AJI0|MA7D1_MOUSE MAP7 domain-containing protein 1 OS=Mus musculus OX=10090 GN=Map7d1 PE=1 SV=1	0.2638	0.228451	0	0.00251262	47.754	32.553	43.349					0	0		#NUM!	0.2638	0	0.00251262	47.754
A2AJI0	115	A2AJI0	A2AJI0	MAP7 domain-containing protein 1	Map7d1	sp|A2AJI0|MA7D1_MOUSE MAP7 domain-containing protein 1 OS=Mus musculus OX=10090 GN=Map7d1 PE=1 SV=1	0.644063	0.0700582	2.81803	1.13085e-16	102.51	96.479	102.51					0	0		#NUM!	0.59142	2.73577	3.87218e-12	99.29	0.579428	2.60753	5.44503e-08	83.332					0.644063	2.81803	1.13085e-16	102.51
A2AJI0	118	A2AJI0	A2AJI0	MAP7 domain-containing protein 1	Map7d1	sp|A2AJI0|MA7D1_MOUSE MAP7 domain-containing protein 1 OS=Mus musculus OX=10090 GN=Map7d1 PE=1 SV=1	0.368274	0.187216	0	0.00155887	44.365	38.646	44.336					0	0		#NUM!
A2AJT4	211	A2AJT4	A2AJT4	Arginine/serine-rich protein PNISR	Pnisr	sp|A2AJT4|PNISR_MOUSE Arginine/serine-rich protein PNISR OS=Mus musculus OX=10090 GN=Pnisr PE=1 SV=1	1	0	70.5982	2.94552e-42	154.7	142.84	99.343	1	69.6713	1.98363e-06	81.316	1	77.4415	2.74647e-27	136.34	1	76.4346	7.11048e-12	110.37	1	68.5083	2.4478e-11	106.99	1	134.477	2.94552e-42	154.7	1	79.9974	6.69493e-13	111.62	1	71.7625	4.11541e-27	133.47	1	34.2599	4.54667e-06	78.794	1	14.5847	0.000293921	55.983
A2AJT4	290	A2AJT4	A2AJT4	Arginine/serine-rich protein PNISR	Pnisr	sp|A2AJT4|PNISR_MOUSE Arginine/serine-rich protein PNISR OS=Mus musculus OX=10090 GN=Pnisr PE=1 SV=1	0.951631	0.00615162	13.1258	3.35435e-10	92.545	83.722	78.489	0.607761	3.08096	0.000216017	51.503	0.717919	4.27445	0.00135664	66.853	0.773406	5.68192	0.000306826	50.783	0.738797	5.27985	0.00023001	50.492					0.846412	7.44194	1.54723e-05	68.234					0.81632	7.52433	0.0127464	43.31
A2ALU4	236	A2ALU4	A2ALU4	Protein Shroom2	Shroom2	sp|A2ALU4|SHRM2_MOUSE Protein Shroom2 OS=Mus musculus OX=10090 GN=Shroom2 PE=1 SV=1	0.975296	0.00285184	16.2899	7.79172e-13	136.53	105.35	117.86	0	0		#NUM!	0.704624	3.79026	7.79172e-13	136.53	0.9608	15.1827	0.000170423	106.67	0.952715	14.9315	0.000307843	85.522	0.66621	3.47773	0.00184235	74.76	0.887464	9.47665	3.47828e-08	124.6	0.870689	9.10876	3.70225e-08	124.12	0.563926	3.57477	0.00675894	58.674	0.523423	3.51827	0.0142954	62.338
A2ALU4	1164	A2ALU4	A2ALU4	Protein Shroom2	Shroom2	sp|A2ALU4|SHRM2_MOUSE Protein Shroom2 OS=Mus musculus OX=10090 GN=Shroom2 PE=1 SV=1	0.484457	0.138052	0	4.04265e-05	83.617	76.928	51.211					0.484457	0	0.00640133	51.211	0.484028	0	0.000348968	73.466													0.461992	0	0.0348703	47.915
A2ALU4	1165	A2ALU4	A2ALU4	Protein Shroom2	Shroom2	sp|A2ALU4|SHRM2_MOUSE Protein Shroom2 OS=Mus musculus OX=10090 GN=Shroom2 PE=1 SV=1	0.810139	0.0307397	7.43803	4.04265e-05	83.617	76.928	58.487					0.484457	0	0.00640133	51.211	0.484028	0	0.000348968	73.466	0.648823	3.49724	0.0303673	49.732					0.691797	3.65506	0.000296014	83.204	0.461992	0	0.0348703	47.915
A2ALU4	318	A2ALU4	A2ALU4	Protein Shroom2	Shroom2	sp|A2ALU4|SHRM2_MOUSE Protein Shroom2 OS=Mus musculus OX=10090 GN=Shroom2 PE=1 SV=1	1	0	35.7834	1.90398e-10	115.12	108.53	79.466	1	17.0486	2.13007e-10	95.823	1	34.788	1.01424e-05	108.18	1	63.167	3.20559e-08	115.12	1	24.9508	1.90398e-10	105.39	1	26.6436	1.83544e-06	78.244	1	41.0988	7.11207e-08	106.6	1	43.2291	2.19009e-05	99.747	1	54.9669	4.10363e-08	84.365	1	21.3753	0.000102375	77.324
A2ALU4	493	A2ALU4	A2ALU4	Protein Shroom2	Shroom2	sp|A2ALU4|SHRM2_MOUSE Protein Shroom2 OS=Mus musculus OX=10090 GN=Shroom2 PE=1 SV=1	0.678516	0.0603817	0.455479	0.00253565	56.482	26.501	48.112	0	0		#NUM!	0.634551	0.504349	0.0283786	40.278																									0.634551	0.504349	0.00253565	56.482
A2ALU4	499	A2ALU4	A2ALU4	Protein Shroom2	Shroom2	sp|A2ALU4|SHRM2_MOUSE Protein Shroom2 OS=Mus musculus OX=10090 GN=Shroom2 PE=1 SV=1	0.826965	0.0272549	4.87814	0.00253565	56.482	26.501	46.408	0	0		#NUM!	0.775901	2.62823	0.0283786	40.278					0.826965	4.87814	0.0156911	46.408																	0.775901	2.62823	0.00253565	56.482
A2ALU4	957	A2ALU4	A2ALU4	Protein Shroom2	Shroom2	sp|A2ALU4|SHRM2_MOUSE Protein Shroom2 OS=Mus musculus OX=10090 GN=Shroom2 PE=1 SV=1	0.368911	0.18703	1.26071	3.91836e-11	103.75	85.953	103.75									0.368911	1.26071	3.91836e-11	103.75									0	0		#NUM!
A2ALU4	959	A2ALU4	A2ALU4	Protein Shroom2	Shroom2	sp|A2ALU4|SHRM2_MOUSE Protein Shroom2 OS=Mus musculus OX=10090 GN=Shroom2 PE=1 SV=1	0.513832	0.113093	1.64299	4.3346e-21	131.04	120.03	131.04					0.513832	1.64299	4.3346e-21	131.04					0.371886	0	1.03241e-08	94.72					0	0		#NUM!									0.324284	0	7.18191e-06	82.36
A2ALU4	960	A2ALU4	A2ALU4	Protein Shroom2	Shroom2	sp|A2ALU4|SHRM2_MOUSE Protein Shroom2 OS=Mus musculus OX=10090 GN=Shroom2 PE=1 SV=1	0.532826	0.105804	2.81946	5.37353e-15	114.62	97.029	114.62									0.519378	2.63764	2.19334e-12	109.42	0.371886	0	1.03241e-08	94.72	0.264143	0.999582	0.000279533	54.152	0	0		#NUM!	0.532826	2.81946	5.37353e-15	114.62					0.324284	0	7.18191e-06	82.36
A2ALU4	798	A2ALU4	A2ALU4	Protein Shroom2	Shroom2	sp|A2ALU4|SHRM2_MOUSE Protein Shroom2 OS=Mus musculus OX=10090 GN=Shroom2 PE=1 SV=1	0.583051	0.0864973	4.48176	2.41713e-05	68.516	59.548	68.516																					0.583051	4.48176	2.41713e-05	68.516	0.425288	3.13407	0.0416183	40.837	0	0		#NUM!
A2ALU4	935	A2ALU4	A2ALU4	Protein Shroom2	Shroom2	sp|A2ALU4|SHRM2_MOUSE Protein Shroom2 OS=Mus musculus OX=10090 GN=Shroom2 PE=1 SV=1	0.701449	0.0543925	3.73629	4.20576e-12	100.64	93.84	100.64																					0.701449	3.73629	4.20576e-12	100.64
A2AM29	484	A2AM29	A2AM29	Protein AF-9	Mllt3	sp|A2AM29|AF9_MOUSE Protein AF-9 OS=Mus musculus OX=10090 GN=Mllt3 PE=1 SV=1	0.982599	0.00205227	17.6457	0.000133685	82.477	65.761	82.477																	0	0		#NUM!	0.982599	17.6457	0.000133685	82.477	0.974759	16.9363	0.00274888	49.223	0	0		#NUM!
A2AN08	619	A2AN08	A2AN08	E3 ubiquitin-protein ligase UBR4	Ubr4	sp|A2AN08|UBR4_MOUSE E3 ubiquitin-protein ligase UBR4 OS=Mus musculus OX=10090 GN=Ubr4 PE=1 SV=1	0.5	0.120958	0	0.000952844	58.024	53.853	47.688									0.5	0	0.00528094	41.711													0.5	0	0.000952844	58.024					0	0		#NUM!
A2AN08	620	A2AN08	A2AN08	E3 ubiquitin-protein ligase UBR4	Ubr4	sp|A2AN08|UBR4_MOUSE E3 ubiquitin-protein ligase UBR4 OS=Mus musculus OX=10090 GN=Ubr4 PE=1 SV=1	0.5	0.120677	0	0.000952844	58.024	53.853	47.688									0.5	0	0.00528094	41.711													0.5	0	0.000952844	58.024					0	0		#NUM!
A2AN08	2715	A2AN08	A2AN08	E3 ubiquitin-protein ligase UBR4	Ubr4	sp|A2AN08|UBR4_MOUSE E3 ubiquitin-protein ligase UBR4 OS=Mus musculus OX=10090 GN=Ubr4 PE=1 SV=1	0.533723	0.105525	3.15761	2.51257e-19	184.71	157.92	49.35					0.533723	3.15761	0.0309658	49.35	0.499963	0	4.27733e-19	184.71	0.442126	0.980741	0.118162	45.307									0.497221	0	0.0563321	40.883					0.499955	0	0.000259976	140.49
A2AN08	2716	A2AN08	A2AN08	E3 ubiquitin-protein ligase UBR4	Ubr4	sp|A2AN08|UBR4_MOUSE E3 ubiquitin-protein ligase UBR4 OS=Mus musculus OX=10090 GN=Ubr4 PE=1 SV=1	0.961273	0.00486425	13.9483	2.9859e-20	192.12	161.43	175.33	0.954693	13.2373	2.59519e-13	180.07	0.957076	13.5665	2.9859e-20	192.12	0.68663	3.41698	4.27733e-19	184.71	0.956051	13.3836	1.04142e-12	172.56	0.951389	13.082	2.06145e-08	166.66	0.959088	13.701	1.97901e-19	188.99	0.696271	3.76175	5.53596e-09	170.89	0.954645	13.2373	5.96463e-10	172.27	0.499955	0	0.000259976	140.49
A2AN08	362	A2AN08	A2AN08	E3 ubiquitin-protein ligase UBR4	Ubr4	sp|A2AN08|UBR4_MOUSE E3 ubiquitin-protein ligase UBR4 OS=Mus musculus OX=10090 GN=Ubr4 PE=1 SV=1	0.630282	0.0732169	5.80737	1.52955e-05	70.316	61.822	61.109									0	0		#NUM!	0.630282	5.80737	0.000140701	61.109					0	0		#NUM!	0.369075	2.41757	0.00614068	41.939
A2AN08	178	A2AN08	A2AN08	E3 ubiquitin-protein ligase UBR4	Ubr4	sp|A2AN08|UBR4_MOUSE E3 ubiquitin-protein ligase UBR4 OS=Mus musculus OX=10090 GN=Ubr4 PE=1 SV=1	0.955907	0.00564039	13.3878	6.83063e-43	160.47	137.14	133.62	0.92018	10.6786	5.32067e-06	78.098	0.947638	12.5764	2.03334e-27	137.62	0.882159	8.74255	6.83063e-43	160.47	0.757266	4.94397	6.48244e-15	115.45	0.663682	3.54869	1.397e-05	71.091	0.896019	9.58762	2.43835e-05	69.619	0.8792	8.62909	2.8495e-20	125.78
A2APB8	486	A2APB8	A2APB8	Targeting protein for Xklp2	Tpx2	sp|A2APB8|TPX2_MOUSE Targeting protein for Xklp2 OS=Mus musculus OX=10090 GN=Tpx2 PE=1 SV=1	0.984447	0.00184795	18.0138	0.000783623	70.944	59.682	67.136	0.912085	10.1597	0.00378015	50.188	0.970109	15.1128	0.00168001	66.246	0.780089	5.49896	0.0010545	62.966	0.959563	13.753	0.00686559	54.7	0.956982	13.4726	0.0267439	50.102	0.970323	15.1449	0.00360674	64.136	0.984447	18.0138	0.00251663	67.136	0.954836	13.2514	0.0657307	41.967
A2APB8	737	A2APB8	A2APB8	Targeting protein for Xklp2	Tpx2	sp|A2APB8|TPX2_MOUSE Targeting protein for Xklp2 OS=Mus musculus OX=10090 GN=Tpx2 PE=1 SV=1	0.997263	0.000291707	25.617	6.77533e-05	102.28	78.923	102.28	0.995432	23.4006	0.000200383	86.291	0.991056	20.4496	0.000751603	77.204	0.996731	24.8444	6.77533e-05	96.591	0.988566	19.428	0.00258862	65.805	0.956655	13.4461	0.00209893	66.285	0.985062	18.2306	0.000226202	85.457	0.997102	25.3901	0.000810287	76.588	0.785834	5.66103	0.00258862	63.16	0.981461	17.2977	0.00156129	69.716
A2APF3	325	A2APF3	A2APF3	Transcriptional repressor CTCFL	Ctcfl	sp|A2APF3|CTCFL_MOUSE Transcriptional repressor CTCFL OS=Mus musculus OX=10090 GN=Ctcfl PE=1 SV=1	1	0	27.0884	0.00947937	53.756	36.983	52.49	0	0		#NUM!	1	18.7212	0.00947937	53.756					1	14.2182	0.0671913	44.318	1	18.7212	0.00947937	53.756	1	18.7212	0.00947937	53.756	1	18.7212	0.025525	46.001	0	0		#NUM!
A2APV2	171	A2APV2	A2APV2	Formin-like protein 2	Fmnl2	sp|A2APV2|FMNL2_MOUSE Formin-like protein 2 OS=Mus musculus OX=10090 GN=Fmnl2 PE=1 SV=2	1	0	50.855	0.00868307	89.698	58.469	57.96	1	26.8837	0.0688821	50.04	1	47.5944	0.0233137	61.679	1	70.332	0.00868307	89.698	1	45.7399	0.0162035	68.422	1	28.4945	0.0253229	60.788					1	55.5027	0.00980928	82.279	1	34.1024	0.0312463	59.245	1	42.0946	0.0278937	60.118
A2AQ19	58	A2AQ19	A2AQ19	RNA polymerase-associated protein RTF1 homolog	Rtf1	sp|A2AQ19|RTF1_MOUSE RNA polymerase-associated protein RTF1 homolog OS=Mus musculus OX=10090 GN=Rtf1 PE=1 SV=1	0.815017	0.0295496	1.47953	0.000940866	43.523	40.981	43.523													0.815017	1.47953	0.000940866	43.523					0.808817	0.901115	0.00146514	40.669
A2AQ19	63	A2AQ19	A2AQ19	RNA polymerase-associated protein RTF1 homolog	Rtf1	sp|A2AQ19|RTF1_MOUSE RNA polymerase-associated protein RTF1 homolog OS=Mus musculus OX=10090 GN=Rtf1 PE=1 SV=1	0.815017	0.0296569	1.47953	0.000940866	43.523	40.981	43.523													0.815017	1.47953	0.000940866	43.523					0.808817	0.901115	0.00146514	40.669
A2AQ19	65	A2AQ19	A2AQ19	RNA polymerase-associated protein RTF1 homolog	Rtf1	sp|A2AQ19|RTF1_MOUSE RNA polymerase-associated protein RTF1 homolog OS=Mus musculus OX=10090 GN=Rtf1 PE=1 SV=1	0.815017	0.0294959	1.47953	0.000940866	43.523	40.981	43.523													0.815017	1.47953	0.000940866	43.523					0.808817	0.901115	0.00146514	40.669
A2AR02	395	A2AR02	A2AR02	Peptidyl-prolyl cis-trans isomerase G	Ppig	sp|A2AR02|PPIG_MOUSE Peptidyl-prolyl cis-trans isomerase G OS=Mus musculus OX=10090 GN=Ppig PE=1 SV=1	1	0	18.1216	0.000746194	73.138	40.588	42.083					0.988338	19.2815	0.00276816	54.368	0.995454	23.4038	0.00577555	47.688													0.998238	27.5332	0.000746194	73.138
A2AR02	354	A2AR02	A2AR02	Peptidyl-prolyl cis-trans isomerase G	Ppig	sp|A2AR02|PPIG_MOUSE Peptidyl-prolyl cis-trans isomerase G OS=Mus musculus OX=10090 GN=Ppig PE=1 SV=1	1	0	24.9508	2.14673e-05	115.82	94.583	43.761	1	23.9642	0.000362515	102.63	1	17.0486	0.000317915	103.88	1	69.6789	2.14673e-05	115.82	1	11.9991	0.00469116	77.562	1	48.4754	0.00389782	78.69	1	24.9508	0.000356545	99.069	1	29.9107	0.00503816	77.068	1	16.7352	0.0357545	51.466	1	15.5483	0.000583147	89.506
A2AR02	254	A2AR02	A2AR02	Peptidyl-prolyl cis-trans isomerase G	Ppig	sp|A2AR02|PPIG_MOUSE Peptidyl-prolyl cis-trans isomerase G OS=Mus musculus OX=10090 GN=Ppig PE=1 SV=1	0.530384	0.106549	0.596495	0.013128	47.429	42.852	47.429													0.530384	0.596495	0.013128	47.429									0.523012	0.505609	0.0300734	42.461	0	0		#NUM!	0	0		#NUM!
A2AR02	255	A2AR02	A2AR02	Peptidyl-prolyl cis-trans isomerase G	Ppig	sp|A2AR02|PPIG_MOUSE Peptidyl-prolyl cis-trans isomerase G OS=Mus musculus OX=10090 GN=Ppig PE=1 SV=1	0.530384	0.106642	0.596495	0.013128	47.429	42.852	47.429													0.530384	0.596495	0.013128	47.429									0.523012	0.505609	0.0300734	42.461	0	0		#NUM!	0	0		#NUM!
A2AR02	257	A2AR02	A2AR02	Peptidyl-prolyl cis-trans isomerase G	Ppig	sp|A2AR02|PPIG_MOUSE Peptidyl-prolyl cis-trans isomerase G OS=Mus musculus OX=10090 GN=Ppig PE=1 SV=1	0.530384	0.106735	0.596495	0.013128	47.429	42.852	47.429													0.530384	0.596495	0.013128	47.429									0.523012	0.505609	0.0300734	42.461	0	0		#NUM!	0	0		#NUM!
A2BE20;A2ART2	88;88	A2BE20	A2BE20		Zfp973;Zfp968	tr|A2BE20|A2BE20_MOUSE Novel KRAB box and zinc finger, C2H2 type domain containing protein OS=Mus musculus OX=10090 GN=Zfp973 PE=3 SV=1;tr|A2ART2|A2ART2_MOUSE Zinc finger protein 966 OS=Mus musculus OX=10090 GN=Zfp968 PE=3 SV=1	0.480059	0.139746	0	0.00484672	45.844	34.739	45.844
A2BE20;A2ART2	89;89	A2BE20	A2BE20		Zfp973;Zfp968	tr|A2BE20|A2BE20_MOUSE Novel KRAB box and zinc finger, C2H2 type domain containing protein OS=Mus musculus OX=10090 GN=Zfp973 PE=3 SV=1;tr|A2ART2|A2ART2_MOUSE Zinc finger protein 966 OS=Mus musculus OX=10090 GN=Zfp968 PE=3 SV=1	0.480059	0.139835	0	0.00484672	45.844	34.739	45.844
A2ATK9	371	A2ATK9	A2ATK9		Fam171a1	tr|A2ATK9|A2ATK9_MOUSE Family with sequence similarity 171, member A1 OS=Mus musculus OX=10090 GN=Fam171a1 PE=1 SV=1	0.664821	0.0644396	3.12722	2.04302e-05	67.69	57.001	52.96	0.345049	1.45349	0.000679153	48.422	0.664821	3.12722	0.000181241	52.96	0.527793	2.14892	0.000199005	51.9									0.431069	1.66273	0.00108128	46.149	0.574567	2.21929	2.04302e-05	67.69	0	0		#NUM!
A2AVA0	1235	A2AVA0	A2AVA0	Sushi, von Willebrand factor type A, EGF and pentraxin domain-containing protein 1	Svep1	sp|A2AVA0|SVEP1_MOUSE Sushi, von Willebrand factor type A, EGF and pentraxin domain-containing protein 1 OS=Mus musculus OX=10090 GN=Svep1 PE=1 SV=1	0.499568	0.125671	0	0.000156792	65.179	51.448	65.179	0.495041	0	0.0427476	42.809	0.499568	0	0.000156792	65.179	0	0		#NUM!	0	0		#NUM!
A2AVA0	1236	A2AVA0	A2AVA0	Sushi, von Willebrand factor type A, EGF and pentraxin domain-containing protein 1	Svep1	sp|A2AVA0|SVEP1_MOUSE Sushi, von Willebrand factor type A, EGF and pentraxin domain-containing protein 1 OS=Mus musculus OX=10090 GN=Svep1 PE=1 SV=1	0.499568	0.125762	0	0.000156792	65.179	51.448	65.179	0.495041	0	0.0427476	42.809	0.499568	0	0.000156792	65.179	0	0		#NUM!	0	0		#NUM!
A2BE28	20	A2BE28	A2BE28	Ribosomal biogenesis protein LAS1L	Las1l	sp|A2BE28|LAS1L_MOUSE Ribosomal biogenesis protein LAS1L OS=Mus musculus OX=10090 GN=Las1l PE=1 SV=1	0.503143	0.115938	1.40712	0.00721572	52.909	35.97	47.392									0.497676	1.48973	0.0107157	48.229									0.466226	1.88141	0.00721572	52.909
A2BH40	697	A2BH40	A2BH40	AT-rich interactive domain-containing protein 1A	Arid1a	sp|A2BH40|ARI1A_MOUSE AT-rich interactive domain-containing protein 1A OS=Mus musculus OX=10090 GN=Arid1a PE=1 SV=1	0.985631	0.00172212	18.3716	9.96132e-06	99.344	88.972	99.344									0.985631	18.3716	9.96132e-06	99.344
A2BH40	365	A2BH40	A2BH40	AT-rich interactive domain-containing protein 1A	Arid1a	sp|A2BH40|ARI1A_MOUSE AT-rich interactive domain-containing protein 1A OS=Mus musculus OX=10090 GN=Arid1a PE=1 SV=1	0.909349	0.0128719	12.5912	7.40786e-06	75.3	71.847	75.3																					0.909349	12.5912	7.40786e-06	75.3
A2BH40	1756	A2BH40	A2BH40	AT-rich interactive domain-containing protein 1A	Arid1a	sp|A2BH40|ARI1A_MOUSE AT-rich interactive domain-containing protein 1A OS=Mus musculus OX=10090 GN=Arid1a PE=1 SV=1	0.446436	0.155102	1.80075	1.50975e-12	72.238	71.018	72.238
A2RSJ4	934	A2RSJ4	A2RSJ4	Bridge-like lipid transfer protein family member 3B	Bltp3b	sp|A2RSJ4|BLT3B_MOUSE Bridge-like lipid transfer protein family member 3B OS=Mus musculus OX=10090 GN=Bltp3b PE=1 SV=2	0.952248	0.00602038	13.6526	6.99006e-06	90.714	81.667	90.397	0.931278	12.4162	7.19078e-05	78.975	0.942768	12.4098	3.63084e-05	82.635	0.693478	3.81403	9.26297e-05	79.635	0.952248	13.6526	8.79297e-06	90.397					0.807126	6.82459	0.000255035	67.396	0.939626	12.2895	6.99006e-06	90.714	0.729348	5.81806	0.00143371	54.368	0.776435	6.29873	0.000219562	72.771
A6H619	914	A6H619	A6H619	PHD and RING finger domain-containing protein 1	Phrf1	sp|A6H619|PHRF1_MOUSE PHD and RING finger domain-containing protein 1 OS=Mus musculus OX=10090 GN=Phrf1 PE=1 SV=2	0.324481	0.206471	0	0.00201937	46.926	35.82	46.926																	0	0		#NUM!									0.30112	0.164527	0.00201937	40.756
A6H619	919	A6H619	A6H619	PHD and RING finger domain-containing protein 1	Phrf1	sp|A6H619|PHRF1_MOUSE PHD and RING finger domain-containing protein 1 OS=Mus musculus OX=10090 GN=Phrf1 PE=1 SV=2	0.468795	0.144499	1.74204	0.000157068	53.342	45.895	51.645									0.431139	0	0.00517975	43.841					0	0		#NUM!	0.468795	1.74204	0.000682678	51.645	0.450766	0	0.000608079	53.342
A6H619	867	A6H619	A6H619	PHD and RING finger domain-containing protein 1	Phrf1	sp|A6H619|PHRF1_MOUSE PHD and RING finger domain-containing protein 1 OS=Mus musculus OX=10090 GN=Phrf1 PE=1 SV=2	0.954262	0.00583563	16.3441	0.000459855	74.776	42.684	49.973	0.383878	0.191503	0.00250903	65.951	0.645211	5.86367	0.00102314	62.617	0.791842	9.01234	0.000602792	70.414	0.590371	4.62136	0.001958	54.637	0.709587	6.89918	0.00165648	56.936	0.82253	10.012	0.000462972	74.662	0.349083	0	0.0372395	41.871	0.354518	0.349228	0.00276115	50.397	0.672894	6.18462	0.00342361	49.089
A6H6J9	175	A6H6J9	A6H6J9		Ankrd50	tr|A6H6J9|A6H6J9_MOUSE Ankyrin repeat domain 50 OS=Mus musculus OX=10090 GN=Ankrd50 PE=1 SV=1	0.651659	0.0683473	1.14436	0.000627755	72.496	60.63	72.496	0.423222	1.14436	0.0024274	69.602	0.435084	1.24262	0.00424047	63.337	0.444448	1.33195	0.00428335	53.754
A6H6J9	177	A6H6J9	A6H6J9		Ankrd50	tr|A6H6J9|A6H6J9_MOUSE Ankyrin repeat domain 50 OS=Mus musculus OX=10090 GN=Ankrd50 PE=1 SV=1	0.880188	0.0171923	10.8889	0.000124717	88.552	82.32	69.361	0.352714	0	0.00405209	53.001	0.693524	2.91538	0.000124717	88.552					0.376108	0	0.00693192	58.159
A6H6J9	178	A6H6J9	A6H6J9		Ankrd50	tr|A6H6J9|A6H6J9_MOUSE Ankyrin repeat domain 50 OS=Mus musculus OX=10090 GN=Ankrd50 PE=1 SV=1	0.86977	0.0188505	10.2143	0.000124717	88.552	82.32	69.361	0.352714	0	0.00405209	53.001	0.693524	2.91538	0.000124717	88.552					0.376108	0	0.00693192	58.159
A6H8H2	971	A6H8H2	A6H8H2	DENN domain-containing protein 4C	Dennd4c	sp|A6H8H2|DEN4C_MOUSE DENN domain-containing protein 4C OS=Mus musculus OX=10090 GN=Dennd4c PE=1 SV=1	0.664636	0.064598	4.86517	1.92911e-05	56.486	49.479	56.486
A6H8H2	1087	A6H8H2	A6H8H2	DENN domain-containing protein 4C	Dennd4c	sp|A6H8H2|DEN4C_MOUSE DENN domain-containing protein 4C OS=Mus musculus OX=10090 GN=Dennd4c PE=1 SV=1	0.602754	0.0810038	2.52	6.6021e-18	130.25	116.65	81.574	0.389074	0	0.000980271	61.962	0.31783	0	0.00953444	45.413	0.343513	0	0.00451897	49.973	0.565074	2.43887	6.6021e-18	130.25	0	0		#NUM!	0.531907	1.97933	0.000104859	80.412	0.331342	0	0.00128414	60.036	0.373532	0	0.00366186	50.752	0.347365	0	0.0289902	45.992
A6H8H2	1057	A6H8H2	A6H8H2	DENN domain-containing protein 4C	Dennd4c	sp|A6H8H2|DEN4C_MOUSE DENN domain-containing protein 4C OS=Mus musculus OX=10090 GN=Dennd4c PE=1 SV=1	0.392944	0.17676	0.715971	2.91562e-06	83.213	73.93	68.49	0.351711	0	2.91562e-06	83.213					0.386667	0	0.000656092	60.602	0.392944	0.715971	2.3178e-05	68.49													0.333074	0	0.00246265	40.756
A6H8H2	1058	A6H8H2	A6H8H2	DENN domain-containing protein 4C	Dennd4c	sp|A6H8H2|DEN4C_MOUSE DENN domain-containing protein 4C OS=Mus musculus OX=10090 GN=Dennd4c PE=1 SV=1	0.508626	0.114131	2.08838	2.91562e-06	83.213	73.93	42.908	0.351711	0	2.91562e-06	83.213					0.386667	0	0.000656092	60.602									0.508626	2.08838	0.0070114	42.908	0.371256	1.37646	0.000172719	55.127	0.333074	0	0.00246265	40.756
A6H8H2	1043	A6H8H2	A6H8H2	DENN domain-containing protein 4C	Dennd4c	sp|A6H8H2|DEN4C_MOUSE DENN domain-containing protein 4C OS=Mus musculus OX=10090 GN=Dennd4c PE=1 SV=1	0.700714	0.054838	6.67689	0.0199677	57.348	52.992	57.348					0.656993	6.13244	0.0339657	47.894	0.700714	6.67689	0.0199677	57.348	0.67413	6.67689	0.0199677	57.348					0.656993	6.13244	0.0199677	57.348	0.620923	6.15532	0.0467123	41.704
A6H8H2	1096	A6H8H2	A6H8H2	DENN domain-containing protein 4C	Dennd4c	sp|A6H8H2|DEN4C_MOUSE DENN domain-containing protein 4C OS=Mus musculus OX=10090 GN=Dennd4c PE=1 SV=1	0.998772	0.000105019	29.103	4.83398e-38	170.35	152.65	109.28	0.790315	5.91768	0.00267262	52.19	0.995215	23.1811	1.00205e-11	125.89	0.997336	25.7324	1.63764e-22	146.78	0.988908	19.6167	0.00119003	63.578	0.998772	29.103	1.31058e-07	109.28	0.926089	10.9953	0.00264586	52.372	0.998542	28.3553	4.83398e-38	170.35
A6X919	22	A6X919	A6X919	Protein C-mannosyl-transferase DPY19L1	Dpy19l1	sp|A6X919|D19L1_MOUSE Protein C-mannosyl-transferase DPY19L1 OS=Mus musculus OX=10090 GN=Dpy19l1 PE=1 SV=1	0.299747	0.215838	0	0.000175629	51.323	38.889	51.323									0.299747	0	0.000175629	51.323
A6X919	23	A6X919	A6X919	Protein C-mannosyl-transferase DPY19L1	Dpy19l1	sp|A6X919|D19L1_MOUSE Protein C-mannosyl-transferase DPY19L1 OS=Mus musculus OX=10090 GN=Dpy19l1 PE=1 SV=1	0.299747	0.215933	0	0.000175629	51.323	38.889	51.323									0.299747	0	0.000175629	51.323
B1AR17	764	B1AR17	B1AR17	DNA helicase	Chd3	tr|B1AR17|B1AR17_MOUSE DNA helicase OS=Mus musculus OX=10090 GN=Chd3 PE=1 SV=1	0.425075	0.162891	0	2.14488e-05	63.323	55.611	49.088	0.286265	0	0.000839379	42.909													0.367157	0	0.00288096	40.129
B1AR17	765	B1AR17	B1AR17	DNA helicase	Chd3	tr|B1AR17|B1AR17_MOUSE DNA helicase OS=Mus musculus OX=10090 GN=Chd3 PE=1 SV=1	0.425075	0.162799	0	2.14488e-05	63.323	55.611	49.088	0.286265	0	0.000839379	42.909													0.367157	0	0.00288096	40.129									0.399982	1.45795	0.000169142	53.073
B1AVY7	838	B1AVY7	B1AVY7	Kinesin-like protein KIF16B	Kif16b	sp|B1AVY7|KI16B_MOUSE Kinesin-like protein KIF16B OS=Mus musculus OX=10090 GN=Kif16b PE=1 SV=1	1	0	71.2355	2.77962e-25	180.28	120.71	81.904	1	63.167	0.000402112	95.264	1	73.2663	0.00309292	77.633	1	144.409	9.96386e-21	170.26	1	160.809	4.9433e-25	178.51	1	81.8055	2.57126e-12	134.68	1	149.417	3.83775e-25	179.41	1	136.801	3.48805e-20	164.81	1	94.7375	4.28311e-08	128.31	1	100.283	7.17148e-08	125.84
B1AXD8	21	B1AXD8	B1AXD8	Akirin-2	Akirin2	sp|B1AXD8|AKIR2_MOUSE Akirin-2 OS=Mus musculus OX=10090 GN=Akirin2 PE=1 SV=1	0.876915	0.0177069	8.54487	0.000593621	70.335	59.28	54.812					0.620073	3.08271	0.0268262	46.621	0.876915	8.54487	0.000593621	70.335									0.723308	4.96386	0.00216948	61.102					0.598453	2.07572	0.00697455	67.115
B1AY10	147	B1AY10	B1AY10	Transcriptional repressor NF-X1	Nfx1	sp|B1AY10|NFX1_MOUSE Transcriptional repressor NF-X1 OS=Mus musculus OX=10090 GN=Nfx1 PE=1 SV=1	0.842524	0.0239712	10.294	0.000668604	51.591	40.804	51.591									0	0		#NUM!	0.351118	3.37947	0.000668604	47.803
B1AY13	1135	B1AY13	B1AY13	Ubiquitin carboxyl-terminal hydrolase 24	Usp24	sp|B1AY13|UBP24_MOUSE Ubiquitin carboxyl-terminal hydrolase 24 OS=Mus musculus OX=10090 GN=Usp24 PE=1 SV=1	0.161658	0.253111	0	0.000227779	61.136	44.256	61.136
B1AY13	1136	B1AY13	B1AY13	Ubiquitin carboxyl-terminal hydrolase 24	Usp24	sp|B1AY13|UBP24_MOUSE Ubiquitin carboxyl-terminal hydrolase 24 OS=Mus musculus OX=10090 GN=Usp24 PE=1 SV=1	0.161658	0.253218	0	0.000227779	61.136	44.256	61.136
B1AY13	1138	B1AY13	B1AY13	Ubiquitin carboxyl-terminal hydrolase 24	Usp24	sp|B1AY13|UBP24_MOUSE Ubiquitin carboxyl-terminal hydrolase 24 OS=Mus musculus OX=10090 GN=Usp24 PE=1 SV=1	0.897431	0.015118	10.4478	4.41336e-26	133.95	123.79	125.39	0.264792	1.86819	0.000488263	56.149	0.897431	10.4478	3.61706e-19	125.39					0.395226	2.89169	3.79266e-06	89.365	0.352416	2.01901	2.18568e-05	80.683	0.498278	2.31976	4.29997e-19	124.14	0.762048	7.23434	3.97767e-14	118.57	0.40831	2.30651	1.83862e-06	90.534	0.426086	2.24528	4.79171e-05	73.546
B1AY13	2044	B1AY13	B1AY13	Ubiquitin carboxyl-terminal hydrolase 24	Usp24	sp|B1AY13|UBP24_MOUSE Ubiquitin carboxyl-terminal hydrolase 24 OS=Mus musculus OX=10090 GN=Usp24 PE=1 SV=1	1	3.27402e-12	97.0647	3.89262e-17	172.41	139.53	172.41	0.999997	55.8746	7.44261e-05	93.772	0.999901	40.0338	0.000600365	92.781	0.999997	56.0143	0.000966274	107.39					1	81.6634	5.5866e-11	133.88	1	97.0647	3.89262e-17	172.41	0.999904	40.1926	8.42952e-05	95.98					0.999485	32.8826	0.00213102	73.219
B1AZA5	12	B1AZA5	B1AZA5	Transmembrane protein 245	Tmem245	sp|B1AZA5|TM245_MOUSE Transmembrane protein 245 OS=Mus musculus OX=10090 GN=Tmem245 PE=1 SV=1	1	0	8.56359	0.00565178	46.481	25.18	42.209					1	13.7556	0.00934155	41.092													1	21.1928	0.00833048	42.568	1	24.1474	0.00658667	45.115
B1AZA5	327	B1AZA5	B1AZA5	Transmembrane protein 245	Tmem245	sp|B1AZA5|TM245_MOUSE Transmembrane protein 245 OS=Mus musculus OX=10090 GN=Tmem245 PE=1 SV=1	0.590627	0.0845319	2.08654	0.00867363	66.393	38.184	58.996	0.567554	5.56007	0.0125401	50.222	0.590627	2.08654	0.00930856	66.393
B1AZA5	329	B1AZA5	B1AZA5	Transmembrane protein 245	Tmem245	sp|B1AZA5|TM245_MOUSE Transmembrane protein 245 OS=Mus musculus OX=10090 GN=Tmem245 PE=1 SV=1	0.571994	0.0904548	2.77212	0.00529504	71.933	46.126	49.31	0.391891	2.69995	0.0300849	53.252																									0.443786	2.63477	0.054459	45.79	0.571994	2.77212	0.0142767	49.31
B1AZI6	1393	B1AZI6	B1AZI6	THO complex subunit 2	Thoc2	sp|B1AZI6|THOC2_MOUSE THO complex subunit 2 OS=Mus musculus OX=10090 GN=Thoc2 PE=1 SV=1	0.970726	0.00352368	18.5631	0.00168591	52.99	43.826	52.99																					0.970726	18.5631	0.00168591	52.99	0.861966	11.125	0.00416503	46.154
B1AZI6	1417	B1AZI6	B1AZI6	THO complex subunit 2	Thoc2	sp|B1AZI6|THOC2_MOUSE THO complex subunit 2 OS=Mus musculus OX=10090 GN=Thoc2 PE=1 SV=1	0.969501	0.00373976	16.5492	1.91365e-40	151.31	125.79	118.44					0.337556	1.98587	1.3932e-06	75.695	0.850992	11.8785	1.91365e-40	151.31	0.941519	14.05	2.01584e-39	142.72	0.723361	5.97012	1.88408e-18	116.2	0.682778	9.24202	3.41487e-05	63.803	0.919022	13.1033	2.55386e-08	87.091	0.824004	8.66707	3.00534e-14	107.75	0.722755	5.59831	5.52824e-24	128.06
B1AZI6	1419	B1AZI6	B1AZI6	THO complex subunit 2	Thoc2	sp|B1AZI6|THOC2_MOUSE THO complex subunit 2 OS=Mus musculus OX=10090 GN=Thoc2 PE=1 SV=1	0.339028	0.196629	1.19161	1.81327e-08	75.695	62.128	75.695																	0	0		#NUM!	0	0		#NUM!	0	0		#NUM!
B1AZI6	1448	B1AZI6	B1AZI6	THO complex subunit 2	Thoc2	sp|B1AZI6|THOC2_MOUSE THO complex subunit 2 OS=Mus musculus OX=10090 GN=Thoc2 PE=1 SV=1	0.489962	0.135201	0	0.00676719	43.12	38.315	43.12																									0.489962	0	0.00676719	43.12
B1AZI6	1450	B1AZI6	B1AZI6	THO complex subunit 2	Thoc2	sp|B1AZI6|THOC2_MOUSE THO complex subunit 2 OS=Mus musculus OX=10090 GN=Thoc2 PE=1 SV=1	0.913912	0.0120462	10.2606	0.00110906	62.002	55.111	62.002									0.615383	2.12038	0.00327346	51.611	0.641733	3.1782	0.00428938	47.32					0.913912	10.2606	0.00110906	62.002	0.489962	0	0.00676719	43.12
B1AZP2	973	B1AZP2	B1AZP2	Disks large-associated protein 4	Dlgap4	sp|B1AZP2|DLGP4_MOUSE Disks large-associated protein 4 OS=Mus musculus OX=10090 GN=Dlgap4 PE=1 SV=1	0.320497	0.208352	0	0.000107698	55.127	48.036	52.72	0.238289	0	0.00120587	42.612	0.271578	0	0.00535679	42.325													0.309833	0	0.000149562	52.541	0.303115	0	0.00172984	46.178	0.242564	0	0.00152749	40.756
B1AZP2	977	B1AZP2	B1AZP2	Disks large-associated protein 4	Dlgap4	sp|B1AZP2|DLGP4_MOUSE Disks large-associated protein 4 OS=Mus musculus OX=10090 GN=Dlgap4 PE=1 SV=1	0.333118	0.200723	0	0.000107698	55.127	48.036	46.833									0.333118	0	0.00118414	46.833
B2RQC6	1859	B2RQC6	B2RQC6	Multifunctional protein CAD;Glutamine-dependent carbamoyl-phosphate synthase;Glutamine amidotransferase;Ammonium-dependent carbamoyl phosphate synthase;Aspartate carbamoyltransferase;Dihydroorotase	Cad	sp|B2RQC6|PYR1_MOUSE Multifunctional protein CAD OS=Mus musculus OX=10090 GN=Cad PE=1 SV=1	1	0	11.5697	3.32216e-06	103.61	84.286	55.885									1	53.7426	3.32216e-06	103.61	1	24.0456	0.00240633	55.763					1	54.7075	3.73995e-06	102.58	1	22.9792	0.00880113	64.52
B2RQC6	1406	B2RQC6	B2RQC6	Multifunctional protein CAD;Glutamine-dependent carbamoyl-phosphate synthase;Glutamine amidotransferase;Ammonium-dependent carbamoyl phosphate synthase;Aspartate carbamoyltransferase;Dihydroorotase	Cad	sp|B2RQC6|PYR1_MOUSE Multifunctional protein CAD OS=Mus musculus OX=10090 GN=Cad PE=1 SV=1	0.998798	0.000102534	29.2	1.1506e-11	177.47	89.66	131.02	0.85365	7.65992	0.00318436	107.03	0.697987	3.63821	1.1506e-11	177.47	0.852563	7.62208	0.00346428	141.71					0.84853	7.48342	4.3993e-06	162.21	0.981251	17.188	0.00281347	144.35	0.853413	7.65317	0.00445891	110.93	0.5	0	0.000494925	151.66	0.853484	7.65317	0.00247584	127.03
B2RQC6	1407	B2RQC6	B2RQC6	Multifunctional protein CAD;Glutamine-dependent carbamoyl-phosphate synthase;Glutamine amidotransferase;Ammonium-dependent carbamoyl phosphate synthase;Aspartate carbamoyltransferase;Dihydroorotase	Cad	sp|B2RQC6|PYR1_MOUSE Multifunctional protein CAD OS=Mus musculus OX=10090 GN=Cad PE=1 SV=1	0.933143	0.0089472	11.4485	0.000494925	151.66	76.285	139.31													0.933143	11.4485	0.00313243	139.31									0	0		#NUM!	0.5	0	0.000494925	151.66
B2RQG2	839	B2RQG2	B2RQG2		Phf3	tr|B2RQG2|B2RQG2_MOUSE PHD finger protein 3 OS=Mus musculus OX=10090 GN=Phf3 PE=1 SV=1	1	0	18.3731	0.00752684	50.04	33.902	50.04													1	18.3731	0.00752684	50.04
B2RQG2	377	B2RQG2	B2RQG2		Phf3	tr|B2RQG2|B2RQG2_MOUSE PHD finger protein 3 OS=Mus musculus OX=10090 GN=Phf3 PE=1 SV=1	0.996011	0.000453462	24.2827	2.1576e-161	207.52	192.35	169.96	0.370094	2.21709	3.67689e-05	55.895	0.978112	16.5897	1.37558e-105	179.11	0.950399	12.8442	7.90324e-58	145.33					0.988076	19.3967	4.71883e-19	107.29	0.996011	24.2827	3.73913e-88	169.96	0.933317	11.6629	1.23719e-09	81.844					0.648208	5.76952	1.69815e-06	67.913
B2RQG2	660	B2RQG2	B2RQG2		Phf3	tr|B2RQG2|B2RQG2_MOUSE PHD finger protein 3 OS=Mus musculus OX=10090 GN=Phf3 PE=1 SV=1	0.797284	0.034087	5.97349	4.31452e-05	64.547	61.356	64.547																																	0	0		#NUM!
B2RRE7	1016	B2RRE7	B2RRE7	OTU domain-containing protein 4	Otud4	sp|B2RRE7|OTUD4_MOUSE OTU domain-containing protein 4 OS=Mus musculus OX=10090 GN=Otud4 PE=1 SV=1	1	9.11018e-11	84.5661	1.05471e-63	178.53	163.92	178.53	0.979683	16.7412	8.60909e-09	97.441	1	63.0642	2.2533e-52	169.36	0.999999	62.19	4.35921e-52	166.49	0.999437	32.4822	3.98211e-20	124.17	0.976563	16.0925	8.60909e-09	97.441	0.999579	33.7551	8.91267e-21	130.23	1	68.8171	1.08961e-42	159.66	0.998425	28.0097	2.98123e-28	141.5	0.967554	14.597	1.26008e-05	72.425
B2RRE7	1017	B2RRE7	B2RRE7	OTU domain-containing protein 4	Otud4	sp|B2RRE7|OTUD4_MOUSE OTU domain-containing protein 4 OS=Mus musculus OX=10090 GN=Otud4 PE=1 SV=1	1	1.9213e-10	81.1526	1.05471e-63	178.53	163.92	178.53	0.979683	16.7412	8.60909e-09	97.441	0.999999	59.5049	2.2533e-52	169.36	0.999999	62.19	4.35921e-52	166.49	0.998061	27.1125	3.98211e-20	124.17	0.976563	16.0925	8.60909e-09	97.441	0.999398	32.1964	8.91267e-21	130.23	1	66.1506	1.08961e-42	159.66	0.997795	26.5502	2.98123e-28	141.5	0.967554	14.597	1.26008e-05	72.425
B2RT41	356	B2RT41	B2RT41		Zfc3h1	tr|B2RT41|B2RT41_MOUSE Zinc finger, C3H1-type containing OS=Mus musculus OX=10090 GN=Zfc3h1 PE=1 SV=1	0.993375	0.00072948	22.0509	0.000100082	107.69	59.844	107.69	0.930159	11.2445	0.000355281	89.157	0.993375	22.0509	0.000100082	107.69	0.96584	14.6494	0.000145042	105.41	0.854204	7.69364	0.00831991	68.164	0.935629	11.66	0.0717652	42.232	0.955912	13.3942	0.00365245	53.193	0.819302	6.57412	0.0363974	50.659
B2RUR8	100	B2RUR8	B2RUR8	OTU domain-containing protein 7B	Otud7b	sp|B2RUR8|OTU7B_MOUSE OTU domain-containing protein 7B OS=Mus musculus OX=10090 GN=Otud7b PE=1 SV=1	1	1.08342e-08	65.5544	2.6918e-82	228.95	204.54	228.95	0.99982	37.5475	2.16949e-26	161.04	0.999999	62.4708	4.56714e-33	175.6	0.999959	44.0079	2.18194e-57	207.64	0.9999	40.0889	3.56089e-57	204.31	0.999991	50.4925	5.17309e-69	218.6	0.994464	22.6087	6.82584e-69	217.19	0.999995	53.4777	1.34821e-28	167.03	0.99995	43.0622	4.49302e-58	211.82	0.999983	47.798	3.16292e-57	205.27
B2RUR8	103	B2RUR8	B2RUR8	OTU domain-containing protein 7B	Otud7b	sp|B2RUR8|OTU7B_MOUSE OTU domain-containing protein 7B OS=Mus musculus OX=10090 GN=Otud7b PE=1 SV=1	0.240174	0.23767	0	0.00818213	43.297	21.252	43.297
B2RUR8	104	B2RUR8	B2RUR8	OTU domain-containing protein 7B	Otud7b	sp|B2RUR8|OTU7B_MOUSE OTU domain-containing protein 7B OS=Mus musculus OX=10090 GN=Otud7b PE=1 SV=1	0.240174	0.237571	0	0.00818213	43.297	21.252	43.297
B2RUR8	105	B2RUR8	B2RUR8	OTU domain-containing protein 7B	Otud7b	sp|B2RUR8|OTU7B_MOUSE OTU domain-containing protein 7B OS=Mus musculus OX=10090 GN=Otud7b PE=1 SV=1	0.240174	0.237473	0	0.00818213	43.297	21.252	43.297
B2RUR8	464	B2RUR8	B2RUR8	OTU domain-containing protein 7B	Otud7b	sp|B2RUR8|OTU7B_MOUSE OTU domain-containing protein 7B OS=Mus musculus OX=10090 GN=Otud7b PE=1 SV=1	0.680787	0.0598401	8.1211	1.9793e-08	90.485	80.247	52.777	0.321336	1.33892	1.0786e-05	75.248	0.680787	8.1211	0.000194497	52.777	0.565057	2.39596	1.35863e-07	76.162	0.527433	6.53066	1.0786e-05	75.248													0.308878	2.19219	0.000991476	46.898	0.283	1.86753	2.30922e-06	80.174
B2RUR8	467	B2RUR8	B2RUR8	OTU domain-containing protein 7B	Otud7b	sp|B2RUR8|OTU7B_MOUSE OTU domain-containing protein 7B OS=Mus musculus OX=10090 GN=Otud7b PE=1 SV=1	0.703813	0.0537996	8.38543	1.9793e-08	90.485	80.247	52.777	0.291851	1.33892	1.0786e-05	75.248	0.703813	8.38543	0.000171456	52.92	0.437198	2.39596	1.35863e-07	76.162	0.463059	4.3025	1.0786e-05	75.248													0.308753	2.19219	0.000991476	46.898	0.282922	1.86753	2.30922e-06	80.174
Q7TQV7;K7N684;B2RVY8	184;184;202	Q7TQV7	Q7TQV7		Or10ak11;Or10ak9;Or10ak12	tr|Q7TQV7|Q7TQV7_MOUSE Olfactory receptor 1333 OS=Mus musculus OX=10090 GN=Or10ak11 PE=1 SV=1;tr|K7N684|K7N684_MOUSE Olfactory receptor family 10 subfamily AK member 9 OS=Mus musculus OX=10090 GN=Or10ak9 PE=4 SV=1;tr|B2RVY8|B2RVY8_MOUSE Olfactory receptor	0.92995	0.0094928	11.2305	0.00628423	46.408	16.72	46.408																	0.92995	11.2305	0.00628423	46.408	0	0		#NUM!	0	0		#NUM!	0	0		#NUM!
B2RXQ2	775	B2RXQ2	B2RXQ2		Ppfia1	tr|B2RXQ2|B2RXQ2_MOUSE Ppfia1 protein OS=Mus musculus OX=10090 GN=Ppfia1 PE=1 SV=1	0.563005	0.0934712	2.49424	0.00501935	48.288	34.247	48.288																	0.539802	3.16935	0.00501935	46.408	0.563005	2.49424	0.00891571	48.288
B2RXQ2	797	B2RXQ2	B2RXQ2		Ppfia1	tr|B2RXQ2|B2RXQ2_MOUSE Ppfia1 protein OS=Mus musculus OX=10090 GN=Ppfia1 PE=1 SV=1	0.815986	0.0293349	6.46832	8.05603e-05	91.401	72.365	53.188	0.690822	3.49157	0.0135445	40.349	0.799655	6.01123	0.00525133	63.691	0.815986	6.46832	0.00283121	53.188	0.742783	4.60562	0.00136634	63.145	0.787289	5.68344	0.00199657	58.246	0.764651	5.1175	0.000217488	88.133	0.716067	4.01738	8.05603e-05	91.401	0.633326	2.37348	0.00233177	56.215	0.659478	2.87055	0.00196251	69.979
B2RXQ2	238	B2RXQ2	B2RXQ2		Ppfia1	tr|B2RXQ2|B2RXQ2_MOUSE Ppfia1 protein OS=Mus musculus OX=10090 GN=Ppfia1 PE=1 SV=1	0.643217	0.0704682	0	0.0085647	49.35	35.144	49.35									0.498678	0	0.0199258	45.825	0	0		#NUM!	0	0		#NUM!	0	0		#NUM!									0	0		#NUM!
B2RXQ2	239	B2RXQ2	B2RXQ2		Ppfia1	tr|B2RXQ2|B2RXQ2_MOUSE Ppfia1 protein OS=Mus musculus OX=10090 GN=Ppfia1 PE=1 SV=1	0.811556	0.0304673	6.38646	5.95745e-06	101.92	93.539	87.49					0.66113	2.32656	0.000279484	80.238	0.811556	6.38646	0.000161046	87.49	0.685737	2.39645	0.000873319	61.942	0	0		#NUM!	0.651009	2.5216	0.000418976	74.786	0.65293	2.4009	0.00065972	66.536					0	0		#NUM!
B2RXQ2	242	B2RXQ2	B2RXQ2		Ppfia1	tr|B2RXQ2|B2RXQ2_MOUSE Ppfia1 protein OS=Mus musculus OX=10090 GN=Ppfia1 PE=1 SV=1	0.955515	0.00567549	13.3231	1.10538e-06	120.6	93.175	120.6					0.839655	6.7472	0.000279484	80.238	0.932149	11.5923	0.000161046	87.498	0.797418	4.72301	0.000598327	78.814	0.56156	2.42063	0.0372322	40.066	0.955515	13.3231	1.10538e-06	120.6	0.903013	10.8577	0.000144587	88.092					0	0		#NUM!
B2RXQ2	716	B2RXQ2	B2RXQ2		Ppfia1	tr|B2RXQ2|B2RXQ2_MOUSE Ppfia1 protein OS=Mus musculus OX=10090 GN=Ppfia1 PE=1 SV=1	0.260147	0.229816	0.67321	0.00118243	46.145	37.326	46.145																																	0.260147	0.67321	0.00118243	46.145
B2RXQ2	717	B2RXQ2	B2RXQ2		Ppfia1	tr|B2RXQ2|B2RXQ2_MOUSE Ppfia1 protein OS=Mus musculus OX=10090 GN=Ppfia1 PE=1 SV=1	0.441892	0.156454	1.76757	3.05466e-05	64.733	51.278	64.733																	0.441892	1.76757	3.05466e-05	64.733
B2RY56	698	B2RY56	B2RY56	RNA-binding protein 25	Rbm25	sp|B2RY56|RBM25_MOUSE RNA-binding protein 25 OS=Mus musculus OX=10090 GN=Rbm25 PE=1 SV=2	0.760933	0.041029	5.02826	0.000323534	52.329	44.796	52.329									0.760933	5.02826	0.000323534	52.329
B2RY56	672	B2RY56	B2RY56	RNA-binding protein 25	Rbm25	sp|B2RY56|RBM25_MOUSE RNA-binding protein 25 OS=Mus musculus OX=10090 GN=Rbm25 PE=1 SV=2	0.999985	1.05842e-06	48.1042	1.6519e-47	196.8	163.61	196.8					0	0		#NUM!	0.999985	48.1042	1.6519e-47	196.8	0.997573	26.1389	8.3251e-21	150.78	0.973027	16.6475	0.0146784	48.351	0.998958	29.8178	3.125e-20	146.84	0.999809	37.18	2.82534e-20	147.36
B9EJ80	532	B9EJ80	B9EJ80	PDZ domain-containing protein 8	Pdzd8	sp|B9EJ80|PDZD8_MOUSE PDZ domain-containing protein 8 OS=Mus musculus OX=10090 GN=Pdzd8 PE=1 SV=1	0.989281	0.00122727	21.6969	4.23548e-05	77.576	68.976	77.576	0.670679	8.1297	0.00172021	46.66	0.989281	21.6969	4.23548e-05	77.576	0	0		#NUM!	0.83646	11.3119	0.00134197	49.638	0.982107	20.3721	0.000179076	64.488	0.954045	18.0193	6.44896e-05	74.222	0.931715	13.7176	0.000159285	65.901	0.94828	18.0287	0.00161282	48.852
B9EJ80	515	B9EJ80	B9EJ80	PDZ domain-containing protein 8	Pdzd8	sp|B9EJ80|PDZD8_MOUSE PDZ domain-containing protein 8 OS=Mus musculus OX=10090 GN=Pdzd8 PE=1 SV=1	0.918953	0.0111937	10.9451	3.61613e-08	108.5	98.121	66.3	0.850781	8.74433	0.00287394	48.641	0.823399	6.76952	1.08817e-05	94.449	0.891825	9.18145	3.61613e-08	108.5									0	0		#NUM!	0.918953	10.9451	0.000542634	66.3	0.683429	3.9486	0.00408513	43.841	0	0		#NUM!
B9EKI3	340	B9EKI3	B9EKI3	TATA element modulatory factor	Tmf1	sp|B9EKI3|TMF1_MOUSE TATA element modulatory factor OS=Mus musculus OX=10090 GN=Tmf1 PE=1 SV=2	0.99049	0.001087	20.902	0.000845179	45.334	30.915	45.334	0	0		#NUM!					0.99049	20.902	0.0010711	45.334
C0HKD9;C0HKD8	116;116	C0HKD9	C0HKD9	Microfibrillar-associated protein 1B;Microfibrillar-associated protein 1A	Mfap1b;Mfap1a	sp|C0HKD9|MFA1B_MOUSE Microfibrillar-associated protein 1B OS=Mus musculus OX=10090 GN=Mfap1b PE=1 SV=1;sp|C0HKD8|MFA1A_MOUSE Microfibrillar-associated protein 1A OS=Mus musculus OX=10090 GN=Mfap1a PE=1 SV=1	1	0	10.5773	0.000178475	54.324	46.332	53.615																	0.578579	1.37646	0.00109602	45.88	1	13.7701	0.000178475	54.324
C0HKD9;C0HKD8	118;118	C0HKD9	C0HKD9	Microfibrillar-associated protein 1B;Microfibrillar-associated protein 1A	Mfap1b;Mfap1a	sp|C0HKD9|MFA1B_MOUSE Microfibrillar-associated protein 1B OS=Mus musculus OX=10090 GN=Mfap1b PE=1 SV=1;sp|C0HKD8|MFA1A_MOUSE Microfibrillar-associated protein 1A OS=Mus musculus OX=10090 GN=Mfap1a PE=1 SV=1	1	0	10.5773	0.000178475	54.324	46.332	53.615																					1	13.7701	0.000178475	54.324
C0HKD9;C0HKD8	132;132	C0HKD9	C0HKD9	Microfibrillar-associated protein 1B;Microfibrillar-associated protein 1A	Mfap1b;Mfap1a	sp|C0HKD9|MFA1B_MOUSE Microfibrillar-associated protein 1B OS=Mus musculus OX=10090 GN=Mfap1b PE=1 SV=1;sp|C0HKD8|MFA1A_MOUSE Microfibrillar-associated protein 1A OS=Mus musculus OX=10090 GN=Mfap1a PE=1 SV=1	1	0	22.3447	3.80425e-30	135.84	126.23	96.748					1	17.8722	1.74122e-10	100.66	1	24.2592	5.10802e-23	124.57					1	10.2723	2.79725e-23	127.92	1	29.2231	3.05632e-13	103.42	1	25.2843	7.59173e-08	88.633	1	13.3956	8.62175e-05	60.527
C0HKD9;C0HKD8	133;133	C0HKD9	C0HKD9	Microfibrillar-associated protein 1B;Microfibrillar-associated protein 1A	Mfap1b;Mfap1a	sp|C0HKD9|MFA1B_MOUSE Microfibrillar-associated protein 1B OS=Mus musculus OX=10090 GN=Mfap1b PE=1 SV=1;sp|C0HKD8|MFA1A_MOUSE Microfibrillar-associated protein 1A OS=Mus musculus OX=10090 GN=Mfap1a PE=1 SV=1	1	0	22.3447	3.80425e-30	135.84	126.23	96.748					1	17.8722	1.74122e-10	100.66	1	24.2592	5.10802e-23	124.57					1	10.2723	2.79725e-23	127.92	1	29.2231	3.05632e-13	103.42	1	25.2843	7.59173e-08	88.633	1	13.3956	8.62175e-05	60.527
C0HKD9;C0HKD8	52;52	C0HKD9	C0HKD9	Microfibrillar-associated protein 1B;Microfibrillar-associated protein 1A	Mfap1b;Mfap1a	sp|C0HKD9|MFA1B_MOUSE Microfibrillar-associated protein 1B OS=Mus musculus OX=10090 GN=Mfap1b PE=1 SV=1;sp|C0HKD8|MFA1A_MOUSE Microfibrillar-associated protein 1A OS=Mus musculus OX=10090 GN=Mfap1a PE=1 SV=1	0.999895	7.28741e-06	39.7672	2.03567e-95	194.11	180.43	179.28	0.992701	21.3033	3.23906e-18	113.15	0.999806	37.1157	8.48334e-59	168.09	0.999895	39.7672	5.70898e-71	179.28	0.999214	31.0411	5.13288e-31	138.4	0.996326	24.3261	1.7965e-31	141.78	0.998972	29.8732	1.45055e-49	157.95	0.998579	28.4669	2.61528e-49	160.41	0.997408	25.8417	1.03416e-13	108.75	0.990656	20.2127	1.15468e-10	99.446
C0HKD9;C0HKD8	53;53	C0HKD9	C0HKD9	Microfibrillar-associated protein 1B;Microfibrillar-associated protein 1A	Mfap1b;Mfap1a	sp|C0HKD9|MFA1B_MOUSE Microfibrillar-associated protein 1B OS=Mus musculus OX=10090 GN=Mfap1b PE=1 SV=1;sp|C0HKD8|MFA1A_MOUSE Microfibrillar-associated protein 1A OS=Mus musculus OX=10090 GN=Mfap1a PE=1 SV=1	0.999967	2.20787e-06	44.8698	2.03567e-95	194.11	180.43	179.28	0.992701	21.3033	3.23906e-18	113.15	0.999879	39.1731	8.48334e-59	168.09	0.999967	44.8698	5.70898e-71	179.28	0.999214	31.0411	5.13288e-31	138.4	0.998557	28.3848	1.7965e-31	141.78	0.99941	32.287	1.45055e-49	157.95	0.999537	33.3392	2.61528e-49	160.41	0.997408	25.8417	1.03416e-13	108.75	0.990656	20.2127	1.15468e-10	99.446
CON__P02672	517	CON__P02672	CON__P02672				0.333333	0.199489	0	0.000559162	80.238	68.967	42.711					0	0		#NUM!	0.333333	0	0.000559162	80.238
CON__P02672	518	CON__P02672	CON__P02672				0.333333	0.199679	0	0.000559162	80.238	68.967	42.711					0	0		#NUM!	0.333333	0	0.000559162	80.238
CON__P06868	365	CON__P06868	CON__P06868				0.68184	0.0595315	3.43896	1.8883e-44	162.15	147.9	162.15					0.664588	3.39855	3.31921e-19	136.43	0.68184	3.43896	1.8883e-44	162.15
CON__P12763	138	CON__P12763	CON__P12763				0.99987	9.63487e-06	38.9036	1.02212e-31	188.48	177.15	122.1	0.71488	4.21375	5.14494e-13	138.42	0.99976	36.2085	1.43104e-20	164.68	0.987009	18.8466	1.02212e-31	188.48	0.929187	11.245	1.11588e-31	188.09	0.997558	26.4595	1.11588e-31	188.09	0.99976	36.2494	1.11588e-31	188.09	0.925181	11.245	1.11588e-31	188.09					0.993155	21.9667	2.25202e-05	113.76
CON__P12763	320	CON__P12763	CON__P12763				0.980971	0.00216021	18.1367	1.74073e-57	216.3	202.47	104.89	0	0		#NUM!	0.980971	18.1367	1.74073e-57	216.3	0.968731	16.9833	9.23638e-10	95.523	0	0		#NUM!	0.642625	4.72294	0.00192594	43.696	0.974684	17.5818	1.03787e-09	94.767	0.979567	19.7598	2.61408e-13	103.33	0.801659	9.54414	1.26001e-05	69.619	0.650173	6.11847	1.62967e-05	68.895
CON__P12763	323	CON__P12763	CON__P12763				0.991051	0.00100728	20.8976	1.65876e-116	233.63	213.91	199.89	0.818493	6.93996	5.95601e-70	172.75	0.81635	6.79442	4.76985e-70	174.7	0.946291	14.6215	1.65876e-116	233.63	0	0		#NUM!	0.767406	6.74165	1.27835e-70	180.45	0.964012	14.4761	1.01735e-104	205.43	0.838715	7.72271	1.75162e-39	150.09	0.834873	7.77427	4.50642e-39	146.76	0.982627	19.9354	1.29658e-39	150.64
CON__P12763	324	CON__P12763	CON__P12763				0.74647	0.0442948	4.44927	1.81201e-07	83.253	73.294	60.814	0	0		#NUM!	0.641892	0	0.0010736	47.618	0	0		#NUM!	0	0		#NUM!	0	0		#NUM!	0.38703	0	0.000981811	48.376	0.74647	4.44927	9.27757e-05	60.814	0.577535	0	0.00331311	41.83	0	0		#NUM!
CON__P12763	325	CON__P12763	CON__P12763				0.954458	0.00579966	13.27	1.01735e-104	205.43	167.55	156.89	0.953108	13.2958	5.46652e-70	173.55	0.934284	11.7341	3.58394e-39	147.87	0.954458	13.27	6.2824e-49	156.89	0.950529	12.9019	1.01735e-104	205.43	0.932723	11.7341	2.57836e-23	124	0.867507	6.89582	4.6937e-18	118.24	0.954242	12.0466	2.3126e-39	149.41	0.947113	12.6802	7.04814e-49	156.23	0.92096	10.933	3.60019e-30	134.66
CON__Q3SX28;P58771;P58774	87;87;87	CON__Q3SX28;P58771;P58774	P58771	Tropomyosin alpha-1 chain;Tropomyosin beta chain	Tpm1;Tpm2	sp|P58771|TPM1_MOUSE Tropomyosin alpha-1 chain OS=Mus musculus OX=10090 GN=Tpm1 PE=1 SV=1;sp|P58774|TPM2_MOUSE Tropomyosin beta chain OS=Mus musculus OX=10090 GN=Tpm2 PE=1 SV=1	0.999999	4.52495e-08	58.4652	6.59298e-05	90.259	78.884	90.259					0.999983	47.7952	0.000391995	74.147	0.999941	42.3146	0.00180775	54.292	0.999466	32.7238	0.00130737	58.164	0.99315	21.613	0.00398284	47.916	0.999999	58.4652	6.59298e-05	90.259	0.999976	46.1588	0.000297614	79.393	0.997783	26.5334	0.00260629	50.376
CON__Q9TRI1	57	CON__Q9TRI1	CON__Q9TRI1				0.436355	0.158985	1.61708	0.000483527	73.405	51.395	73.405									0.436355	1.61708	0.000483527	73.405
CON__Q9TRI1	60	CON__Q9TRI1	CON__Q9TRI1				0.670835	0.0634181	6.29873	6.17207e-06	85.537	68.871	46.847					0.419749	1.98638	0.00190912	53.033									0.316671	1.48804	0.00361638	44.811					0.670835	6.29873	0.00108312	46.847
D2EAC2	381	D2EAC2	D2EAC2	Zinc finger BED domain-containing protein 6	Zbed6	sp|D2EAC2|ZBED6_MOUSE Zinc finger BED domain-containing protein 6 OS=Mus musculus OX=10090 GN=Zbed6 PE=1 SV=1	0.546686	0.10026	0.813391	0.000129946	66.874	53.247	61.732					0.546686	0.813391	0.000611787	61.732					0.534203	0.595102	0.000129946	66.874
D2EAC2	383	D2EAC2	D2EAC2	Zinc finger BED domain-containing protein 6	Zbed6	sp|D2EAC2|ZBED6_MOUSE Zinc finger BED domain-containing protein 6 OS=Mus musculus OX=10090 GN=Zbed6 PE=1 SV=1	0.894285	0.0154622	9.2734	1.97647e-06	90.308	81.913	79.426	0.714994	3.99449	0.00236345	45.844	0.894285	9.2734	2.68938e-05	79.426	0.824832	6.72912	8.57199e-05	70.414					0.702701	3.73577	0.00183768	47.554	0.793243	5.83946	0.000437538	56.9	0.793243	5.83946	6.24293e-05	73.389					0.643214	2.55948	0.00034961	58.49
D3YUJ3;Q8BGU5	99;71	D3YUJ3;Q8BGU5	Q8BGU5	Cyclin-Y-like protein 1;Cyclin-Y	Ccnyl1;Ccny	sp|D3YUJ3|CCYL1_MOUSE Cyclin-Y-like protein 1 OS=Mus musculus OX=10090 GN=Ccnyl1 PE=1 SV=1;sp|Q8BGU5|CCNY_MOUSE Cyclin-Y OS=Mus musculus OX=10090 GN=Ccny PE=1 SV=1	0.709262	0.0525486	4.7676	0.00280892	79.885	58.772	79.885	0	0		#NUM!	0.709262	4.7676	0.00280892	79.885									0.392693	0	0.0288352	56.529	0	0		#NUM!
D3YUJ3;Q8BGU5	101;73	D3YUJ3;Q8BGU5	Q8BGU5	Cyclin-Y-like protein 1;Cyclin-Y	Ccnyl1;Ccny	sp|D3YUJ3|CCYL1_MOUSE Cyclin-Y-like protein 1 OS=Mus musculus OX=10090 GN=Ccnyl1 PE=1 SV=1;sp|Q8BGU5|CCNY_MOUSE Cyclin-Y OS=Mus musculus OX=10090 GN=Ccny PE=1 SV=1	0.93236	0.00914432	14.4049	1.00299e-32	176.4	150.27	176.4	0.615263	4.65965	0.0404892	47.808									0.621452	3.116	0.017119	52.966	0.678036	6.27401	0.00046062	104.17	0.635369	3.29065	0.00026186	95.067	0.869611	10.2226	9.81019e-05	100.4	0.773495	7.21989	0.0042756	83.499	0.760342	6.94796	0.00327577	86.214
D3YUJ3	350	D3YUJ3	D3YUJ3	Cyclin-Y-like protein 1	Ccnyl1	sp|D3YUJ3|CCYL1_MOUSE Cyclin-Y-like protein 1 OS=Mus musculus OX=10090 GN=Ccnyl1 PE=1 SV=1	0.5	0.120208	0	0.00238028	60.489	32.52	40.085					0.5	0	0.00238028	60.489	0.5	0	0.0238075	40.085
D3YUJ3	352	D3YUJ3	D3YUJ3	Cyclin-Y-like protein 1	Ccnyl1	sp|D3YUJ3|CCYL1_MOUSE Cyclin-Y-like protein 1 OS=Mus musculus OX=10090 GN=Ccnyl1 PE=1 SV=1	0.999993	4.11182e-07	51.3337	7.29256e-106	247.13	212.38	247.13	0.99984	37.9559	5.80874e-22	172.13	0.992986	21.5095	1.44524e-49	208.74	0.5	0	0.0238075	40.085	0.996156	24.1353	9.39724e-40	198.57	0.984771	18.1065	1.33122e-12	132.59					0.990746	20.2962	5.80874e-22	172.13	0.98057	17.03	9.86099e-17	146.36	0.999842	38.0009	3.37115e-32	191.29
D3YXK1	150	D3YXK1	D3YXK1	Sterile alpha motif domain-containing protein 1	Samd1	sp|D3YXK1|SAMD1_MOUSE Sterile alpha motif domain-containing protein 1 OS=Mus musculus OX=10090 GN=Samd1 PE=1 SV=1	0.987559	0.00145248	18.997	0.00083606	65.467	48.398	65.467					0.758898	4.97983	0.00216214	48.315	0.987559	18.997	0.00083606	65.467	0.877633	8.55649	0.0054614	40.622	0.986882	18.764	0.0178859	40.493	0.887469	8.96881	0.00729711	47.904	0.942329	12.1324	0.00514669	46.121	0.986473	18.6289	0.00109589	61.265	0.965766	14.5041	0.0010271	62.377
D3YXK2	20	D3YXK2	D3YXK2	Scaffold attachment factor B1	Safb	sp|D3YXK2|SAFB1_MOUSE Scaffold attachment factor B1 OS=Mus musculus OX=10090 GN=Safb PE=1 SV=2	0.310075	0.212035	0.302195	4.35396e-70	155.1	141.98	155.1	0	0		#NUM!					0.163445	0	0.00057666	42.241					0.310075	0.302195	4.35396e-70	155.1	0.300036	0	1.42341e-11	92.874
D3YXK2	21	D3YXK2	D3YXK2	Scaffold attachment factor B1	Safb	sp|D3YXK2|SAFB1_MOUSE Scaffold attachment factor B1 OS=Mus musculus OX=10090 GN=Safb PE=1 SV=2	0.318795	0.208823	0.547804	3.15077e-17	105.49	86.704	105.49	0	0		#NUM!					0.163445	0	0.00057666	42.241									0.300036	0	1.42341e-11	92.874
D3YXK2	24	D3YXK2	D3YXK2	Scaffold attachment factor B1	Safb	sp|D3YXK2|SAFB1_MOUSE Scaffold attachment factor B1 OS=Mus musculus OX=10090 GN=Safb PE=1 SV=2	0.456919	0.150072	4.95944	4.91589e-33	124.28	106.18	124.28	0.306596	2.39094	6.01314e-05	55.492	0.456919	4.95944	4.91589e-33	124.28	0.324009	1.67944	1.68732e-11	90.303	0.364241	1.80267	6.93096e-25	116.94									0.308756	1.4359	6.80028e-05	53.231	0.288657	1.03687	1.77426e-06	77.433
D3YXK2;Q80YR5	366;387	D3YXK2;Q80YR5	D3YXK2	Scaffold attachment factor B1;Scaffold attachment factor B2	Safb;Safb2	sp|D3YXK2|SAFB1_MOUSE Scaffold attachment factor B1 OS=Mus musculus OX=10090 GN=Safb PE=1 SV=2;sp|Q80YR5|SAFB2_MOUSE Scaffold attachment factor B2 OS=Mus musculus OX=10090 GN=Safb2 PE=1 SV=2	1	1.03035e-11	93.1162	0	396.93	396.93	302.71	1	69.1717	1.11801e-185	263.54	1	89.4969	1.05388e-232	293.46	1	93.1162	0	351.02	1	78.1187	0	396.93	1	81.181	0	318.69	1	84.8532	0	345.67	1	71.0317	0	379.94	1	91.0817	0	333.36	1	77.7532	5.55753e-208	279.73
D3YXK2	623	D3YXK2	D3YXK2	Scaffold attachment factor B1	Safb	sp|D3YXK2|SAFB1_MOUSE Scaffold attachment factor B1 OS=Mus musculus OX=10090 GN=Safb PE=1 SV=2	1	0	51.2639	0.000650479	98.754	68.185	55.578	0	0		#NUM!	0.999602	34.0006	0.00244666	82.803	1	72.2723	0.000650479	98.754	0.991996	20.9319	0.0496488	57.293	0	0		#NUM!	0.994496	22.5694	0.0107902	72.531	0.999467	32.7282	0.00682835	76.843	0	0		#NUM!	0	0		#NUM!
D3YXK2	626	D3YXK2	D3YXK2	Scaffold attachment factor B1	Safb	sp|D3YXK2|SAFB1_MOUSE Scaffold attachment factor B1 OS=Mus musculus OX=10090 GN=Safb PE=1 SV=2	1	0	51.2639	1.41388e-48	203.85	170.31	55.578	1	63.276	4.24265e-20	167.32	0.999997	54.9671	1.12558e-12	140.31	1	72.2723	5.70144e-08	145.01	0.999999	61.5258	1.64058e-24	175.15	0.999996	54.4639	3.80388e-25	180.84	0.999991	50.6158	6.03336e-16	143.94	0.999999	61.6934	2.06078e-24	173.25	0.999997	55.8597	8.52953e-05	112.42	0.999998	56.677	2.7059e-12	137.8
D3YZP9	233	D3YZP9	D3YZP9	Coiled-coil domain-containing protein 6	Ccdc6	sp|D3YZP9|CCDC6_MOUSE Coiled-coil domain-containing protein 6 OS=Mus musculus OX=10090 GN=Ccdc6 PE=1 SV=1	1	0	34.3201	1.40242e-26	148.85	121.24	63.062	1	17.3714	2.99491e-15	123.19	1	40.2522	3.79062e-07	108.17	1	32.619	2.30112e-15	125.23	1	37.2622	3.84901e-26	142.98	1	68.3309	6.53717e-11	118.37	1	43.2859	0.00145297	74.141	1	26.8027	1.37016e-18	131.98	1	66.1419	2.34469e-16	133.09	1	36.114	0.000781689	72.898
D3YZP9	237	D3YZP9	D3YZP9	Coiled-coil domain-containing protein 6	Ccdc6	sp|D3YZP9|CCDC6_MOUSE Coiled-coil domain-containing protein 6 OS=Mus musculus OX=10090 GN=Ccdc6 PE=1 SV=1	1	0	34.3201	9.16997e-68	200.6	178.17	63.062	1	17.3714	2.99491e-15	123.19	1	40.2522	7.12384e-53	175.33	1	32.619	2.30112e-15	125.23	1	37.2622	4.63226e-27	150.69	1	68.3309	6.53717e-11	118.37	1	43.2859	3.00974e-20	136.43	1	26.8027	2.41941e-26	144.27	1	66.1419	2.34469e-16	133.09	1	36.114	1.20431e-26	148.26
D3YZP9	410	D3YZP9	D3YZP9	Coiled-coil domain-containing protein 6	Ccdc6	sp|D3YZP9|CCDC6_MOUSE Coiled-coil domain-containing protein 6 OS=Mus musculus OX=10090 GN=Ccdc6 PE=1 SV=1	0.520699	0.110469	3.37008	0.00936605	78.655	34.452	76.332	0.333333	0	0.0232741	70.942	0.520699	3.37008	0.013238	76.332									0.333333	0	0.0179579	73.499					0.333333	0	0.0232741	70.942	0.333333	0	0.00936605	78.655
D3YZP9	411	D3YZP9	D3YZP9	Coiled-coil domain-containing protein 6	Ccdc6	sp|D3YZP9|CCDC6_MOUSE Coiled-coil domain-containing protein 6 OS=Mus musculus OX=10090 GN=Ccdc6 PE=1 SV=1	0.411901	0.168017	0	0.000868269	103.08	57.715	103.08	0.333333	0	0.0232741	70.942					0.411901	0	0.000868269	103.08	0.404885	0	0.0179579	73.499	0.333333	0	0.0179579	73.499					0.333333	0	0.0232741	70.942	0.333333	0	0.00936605	78.655	0.408085	0	0.0039749	84.658
D3YZP9	412	D3YZP9	D3YZP9	Coiled-coil domain-containing protein 6	Ccdc6	sp|D3YZP9|CCDC6_MOUSE Coiled-coil domain-containing protein 6 OS=Mus musculus OX=10090 GN=Ccdc6 PE=1 SV=1	0.624985	0.0750727	3.748	0.000868269	103.08	57.715	92.866	0.333333	0	0.0232741	70.942					0.411901	0	0.000868269	103.08	0.404885	0	0.0179579	73.499	0.333333	0	0.0179579	73.499	0.624985	3.748	0.00157519	92.866	0.333333	0	0.0232741	70.942	0.333333	0	0.00936605	78.655	0.408085	0	0.0039749	84.658
D3YZP9	345	D3YZP9	D3YZP9	Coiled-coil domain-containing protein 6	Ccdc6	sp|D3YZP9|CCDC6_MOUSE Coiled-coil domain-containing protein 6 OS=Mus musculus OX=10090 GN=Ccdc6 PE=1 SV=1	0.12544	0.256551	0.0608813	0.00063139	41.844	33.509	41.844									0	0		#NUM!																					0.12544	0.0608813	0.00063139	41.844
D3YZP9	352	D3YZP9	D3YZP9	Coiled-coil domain-containing protein 6	Ccdc6	sp|D3YZP9|CCDC6_MOUSE Coiled-coil domain-containing protein 6 OS=Mus musculus OX=10090 GN=Ccdc6 PE=1 SV=1	0.114577	0.257571	0.120117	0.00063139	41.844	33.509	41.844									0	0		#NUM!																					0.114577	0.120117	0.00063139	41.844
D3YZP9	354	D3YZP9	D3YZP9	Coiled-coil domain-containing protein 6	Ccdc6	sp|D3YZP9|CCDC6_MOUSE Coiled-coil domain-containing protein 6 OS=Mus musculus OX=10090 GN=Ccdc6 PE=1 SV=1	0.269108	0.226021	0	1.04148e-176	209.09	193.79	143.91	0.142704	0	1.67618e-17	89.096	0.269108	0	8.98263e-80	143.91	0	0		#NUM!					0.195563	0	2.76315e-113	175.69	0.209091	0	1.42313e-132	176.73	0.22249	0	1.38064e-80	154.16
D3YZP9	355	D3YZP9	D3YZP9	Coiled-coil domain-containing protein 6	Ccdc6	sp|D3YZP9|CCDC6_MOUSE Coiled-coil domain-containing protein 6 OS=Mus musculus OX=10090 GN=Ccdc6 PE=1 SV=1	0.269108	0.226118	0	1.04148e-176	209.09	193.79	143.91	0.142704	0	1.67618e-17	89.096	0.269108	0	8.98263e-80	143.91	0	0		#NUM!					0.195563	0	2.76315e-113	175.69	0.209091	0	1.42313e-132	176.73	0.22249	0	1.38064e-80	154.16
D3YZP9	356	D3YZP9	D3YZP9	Coiled-coil domain-containing protein 6	Ccdc6	sp|D3YZP9|CCDC6_MOUSE Coiled-coil domain-containing protein 6 OS=Mus musculus OX=10090 GN=Ccdc6 PE=1 SV=1	0.269108	0.226215	0	1.04148e-176	209.09	193.79	143.91	0.142704	0	1.67618e-17	89.096	0.269108	0	8.98263e-80	143.91	0	0		#NUM!					0.195563	0	2.76315e-113	175.69	0.209091	0	1.42313e-132	176.73	0.22249	0	1.38064e-80	154.16
D3YZP9	360	D3YZP9	D3YZP9	Coiled-coil domain-containing protein 6	Ccdc6	sp|D3YZP9|CCDC6_MOUSE Coiled-coil domain-containing protein 6 OS=Mus musculus OX=10090 GN=Ccdc6 PE=1 SV=1	0.622088	0.076005	6.59731	1.4083e-153	194.91	185.43	160.81	0.142704	0	1.67618e-17	89.096					0.443897	6.94744	8.15922e-66	143.33	0.622088	6.59731	1.16782e-80	161.04	0.195563	0	2.76315e-113	175.69	0.323361	4.84422	1.32078e-17	89.943	0.294249	3.37599	4.25576e-43	118.84	0.269628	3.51158	4.58621e-34	115.22	0.544939	7.61114	1.42313e-132	183.59
D3Z0M9	105	D3Z0M9	D3Z0M9	RNA helicase	Ddx23	tr|D3Z0M9|D3Z0M9_MOUSE RNA helicase OS=Mus musculus OX=10090 GN=Ddx23 PE=1 SV=1	0.666667	0.0642024	0	0.0158369	55.314	35.304	40.066									0	0		#NUM!	0.560052	0	0.0482464	43.03	0	0		#NUM!	0.605256	0	0.0158369	55.314	0	0		#NUM!
D3Z0M9	106	D3Z0M9	D3Z0M9	RNA helicase	Ddx23	tr|D3Z0M9|D3Z0M9_MOUSE RNA helicase OS=Mus musculus OX=10090 GN=Ddx23 PE=1 SV=1	0.666667	0.0641235	0	0.0158369	55.314	35.304	40.066									0	0		#NUM!	0.560052	0	0.0482464	43.03	0	0		#NUM!	0.605256	0	0.0158369	55.314	0	0		#NUM!
D3Z0M9	108	D3Z0M9	D3Z0M9	RNA helicase	Ddx23	tr|D3Z0M9|D3Z0M9_MOUSE RNA helicase OS=Mus musculus OX=10090 GN=Ddx23 PE=1 SV=1	0.907776	0.0131536	6.92105	0.0158369	55.314	35.304	42.809									0	0		#NUM!	0.879896	5.63846	0.0482464	43.03	0	0		#NUM!	0.907776	6.92105	0.0158369	55.314	0	0		#NUM!
D3Z5X9	389	D3Z5X9	D3Z5X9		Erich2	tr|D3Z5X9|D3Z5X9_MOUSE Glutamate rich 2 OS=Mus musculus OX=10090 GN=Erich2 PE=1 SV=1	1	0	19.6153	0.00809448	68.069	7.668	68.069													1	24.2286	0.00809448	68.069																	1	19.6153	0.00809448	68.069
E1U8D0	1251	E1U8D0	E1U8D0	Microtubule cross-linking factor 2;N-terminal form;C-terminal 80 kDa form	Mtcl2	sp|E1U8D0|MTCL2_MOUSE Microtubule cross-linking factor 2 OS=Mus musculus OX=10090 GN=Mtcl2 PE=1 SV=4	0.976249	0.00275577	16.5254	0.0174962	59.426	49.012	59.426																																	0.737601	5.59183	0.0211444	56.359
E2JF22	1646	E2JF22	E2JF22	Piezo-type mechanosensitive ion channel component 1	Piezo1	sp|E2JF22|PIEZ1_MOUSE Piezo-type mechanosensitive ion channel component 1 OS=Mus musculus OX=10090 GN=Piezo1 PE=1 SV=1	1	1.59875e-08	63.3862	3.40323e-80	242.97	214.79	229.82	0.999734	35.7487	2.99971e-08	160.91	0.999987	48.9181	1.27748e-21	189.66	1	63.3862	3.95023e-64	229.82	0.999999	60.1265	3.40323e-80	242.97	0.999957	43.6963	1.76439e-15	180.66	0.999999	60.1265	2.65616e-39	208.84	0.999958	43.8154	2.36311e-06	141.89	0.999734	35.7487	3.74423e-21	183.85	0.999983	47.6448	4.82962e-30	201.56
E9PUA5;Q9QWT9	490;492	E9PUA5	E9PUA5	Kinesin-like protein;Kinesin-like protein KIFC1	Kifc5b;Kifc1	tr|E9PUA5|E9PUA5_MOUSE Kinesin-like protein OS=Mus musculus OX=10090 GN=Kifc5b PE=1 SV=1;sp|Q9QWT9|KIFC1_MOUSE Kinesin-like protein KIFC1 OS=Mus musculus OX=10090 GN=Kifc1 PE=1 SV=2	0.835953	0.0251447	7.09129	0.00060654	70.094	64.553	62.739	0	0		#NUM!	0.835953	7.09129	0.000817428	62.739	0	0		#NUM!					0.737564	4.72147	0.00060654	70.094									0.691688	3.6981	0.00598257	48.968
E9PUR0	1678	E9PUR0	E9PUR0		Ankhd1	tr|E9PUR0|E9PUR0_MOUSE Ankyrin repeat and KH domain containing 1 OS=Mus musculus OX=10090 GN=Ankhd1 PE=1 SV=1	0.855864	0.0213552	7.73631	0.00841348	101.46	39.352	69.375	0.707729	3.84082	0.0443205	82.645	0.855474	7.72259	0.00844906	101.46	0.855474	7.72259	0.00844906	101.46					0.855474	7.72259	0.00841348	93.098	0.855474	7.72259	0.00844389	100.25	0.708682	3.86083	0.00926538	85.862
E9PUR0	2277	E9PUR0	E9PUR0		Ankhd1	tr|E9PUR0|E9PUR0_MOUSE Ankyrin repeat and KH domain containing 1 OS=Mus musculus OX=10090 GN=Ankhd1 PE=1 SV=1	0.126024	0.255875	0.0906156	0.000467095	44.317	35.842	44.317
E9PV82	119	E9PV82	E9PV82	Protein FAM53A	Fam53a	sp|E9PV82|FA53A_MOUSE Protein FAM53A OS=Mus musculus OX=10090 GN=Fam53a PE=1 SV=1	0.997962	0.000202042	26.8982	0.000655823	94.465	67.328	65.695									0.995947	23.9047	0.0258288	59.739	0.991784	20.8177	0.0245191	50.484					0.995547	23.4936	0.0539905	51.252	0.990316	20.0972	0.101326	44.564	0.987003	18.8049	0.000655823	94.465
E9PVX6	517	E9PVX6	E9PVX6	Proliferation marker protein Ki-67	Mki67	sp|E9PVX6|KI67_MOUSE Proliferation marker protein Ki-67 OS=Mus musculus OX=10090 GN=Mki67 PE=1 SV=1	0.980623	0.00223938	19.4215	0.000493723	60.272	50.626	60.272																					0.980623	19.4215	0.000493723	60.272
E9PVX6	212	E9PVX6	E9PVX6	Proliferation marker protein Ki-67	Mki67	sp|E9PVX6|KI67_MOUSE Proliferation marker protein Ki-67 OS=Mus musculus OX=10090 GN=Mki67 PE=1 SV=1	0.469276	0.144051	0	7.79836e-11	110.4	98.2	110.4									0.469276	0	7.79836e-11	110.4													0.390647	0	0.000191822	63.578	0	0		#NUM!
E9PVX6	213	E9PVX6	E9PVX6	Proliferation marker protein Ki-67	Mki67	sp|E9PVX6|KI67_MOUSE Proliferation marker protein Ki-67 OS=Mus musculus OX=10090 GN=Mki67 PE=1 SV=1	0.554377	0.0972237	2.2033	7.79836e-11	110.4	98.2	88.222					0.554377	2.2033	3.79266e-06	88.222	0.469276	0	7.79836e-11	110.4													0.390647	0	0.000191822	63.578	0	0		#NUM!
E9PVZ8	2655	E9PVZ8	E9PVZ8		Golgb1	tr|E9PVZ8|E9PVZ8_MOUSE Golgin B1 OS=Mus musculus OX=10090 GN=Golgb1 PE=1 SV=1	1	0	33.8228	0.00436177	57.034	39.867	57.034	1	26.1725	0.0150744	40.941	1	29.0438	0.00987058	47.037					1	33.8228	0.00436177	57.034
E9PW37	133	E9PW37	E9PW37		Rasal2	tr|E9PW37|E9PW37_MOUSE RAS protein activator like 2 OS=Mus musculus OX=10090 GN=Rasal2 PE=1 SV=1	0.342526	0.195202	2.30599	0.000612349	49.942	36.2	49.942									0.342526	2.30599	0.000612349	49.942
E9PWW9	1281	E9PWW9	E9PWW9		Rsf1	tr|E9PWW9|E9PWW9_MOUSE Remodeling and spacing factor 1 OS=Mus musculus OX=10090 GN=Rsf1 PE=1 SV=2	0.922247	0.0106028	8.44889	3.52077e-10	95.206	92.24	91.086									0.860034	4.61302	5.46916e-05	63.225	0.842192	4.14448	0.00288043	48.088	0.901855	7.09983	1.65196e-05	70.98													0.830897	3.93779	5.21229e-05	60.747
E9PWW9	1286	E9PWW9	E9PWW9		Rsf1	tr|E9PWW9|E9PWW9_MOUSE Remodeling and spacing factor 1 OS=Mus musculus OX=10090 GN=Rsf1 PE=1 SV=2	0.76741	0.0395021	3.43987	3.52077e-10	95.206	92.24	95.206									0.652461	0.502885	5.46916e-05	63.225	0.655334	0.432841	0.00288043	48.088	0.741283	2.80929	1.65196e-05	70.98													0.65515	0.403897	5.21229e-05	60.747
E9PWW9	608	E9PWW9	E9PWW9		Rsf1	tr|E9PWW9|E9PWW9_MOUSE Remodeling and spacing factor 1 OS=Mus musculus OX=10090 GN=Rsf1 PE=1 SV=2	0.999998	7.38711e-08	59.3527	1.89184e-10	108.64	100.25	102.27	0.990502	22.7201	0.000553866	56.303	0.999972	47.8873	6.71074e-08	98.299	0.992403	24.1709	6.60909e-05	74.456	0.982723	20.56	4.71489e-05	77.19	0.977295	19.3494	0.000873852	51.39	0.999998	59.3527	5.76727e-10	102.27	0.998292	30.5852	1.3178e-05	84.127	0.982212	20.4311	0.000192972	64.152	0.999639	36.8656	3.1546e-08	100.08
E9PX68	258	E9PX68	E9PX68		Slc4a1ap	tr|E9PX68|E9PX68_MOUSE Solute carrier family 4 (anion exchanger), member 1, adaptor protein OS=Mus musculus OX=10090 GN=Slc4a1ap PE=1 SV=1	1	2.82718e-11	90.5623	2.04227e-78	206.8	197.22	152.94	0.999974	47.6773	1.29939e-45	166.35	0.999997	57.1717	1.46883e-54	179.46	1	90.5623	6.40406e-69	199.61	1	70.0679	1.27012e-60	187	0.999996	55.572	1.72208e-60	184.99	1	82.9402	2.93431e-78	204.13	1	78.0101	2.04227e-78	206.8	0.994452	24.4617	7.96243e-28	146.78	0.999997	57.2808	3.60484e-54	174.95
E9PX68	412	E9PX68	E9PX68		Slc4a1ap	tr|E9PX68|E9PX68_MOUSE Solute carrier family 4 (anion exchanger), member 1, adaptor protein OS=Mus musculus OX=10090 GN=Slc4a1ap PE=1 SV=1	0.640292	0.0708798	6.41012	1.63726e-08	93.147	88.091	77.984																					0.587009	5.23776	3.21543e-05	68.101
E9PXF3	26	E9PXF3	E9PXF3		Semp2l1	tr|E9PXF3|E9PXF3_MOUSE SUMO/sentrin specific peptidase 2-like 1 OS=Mus musculus OX=10090 GN=Semp2l1 PE=3 SV=1	1	0	29.4372	0.00625505	63.816	31.935	63.816																					1	29.4372	0.00625505	63.816	0	0		#NUM!
E9PYF7	223	E9PYF7	E9PYF7		Ap1ar	tr|E9PYF7|E9PYF7_MOUSE AP1AR OS=Mus musculus OX=10090 GN=Ap1ar PE=1 SV=1	0.838367	0.0245518	7.14903	0.0104502	55.841	55.841	55.841									0.838367	7.14903	0.0104502	55.841
E9PYH6	1159	E9PYH6	E9PYH6	Histone-lysine N-methyltransferase SETD1A	Setd1a	sp|E9PYH6|SET1A_MOUSE Histone-lysine N-methyltransferase SETD1A OS=Mus musculus OX=10090 GN=Setd1a PE=1 SV=1	1	0	16.8695	0.000674306	64.705	53.013	42.947	0.5	0	0.00219701	52.814					0.5	0	0.00151839	57.989					1	16.8695	0.00117743	58.079	1	13.6294	0.00595936	43.791	1	25.155	0.00142611	57.366	0.5	0	0.00559104	44.807	1	21.7502	0.00276115	50.397
E9PYH6	1160	E9PYH6	E9PYH6	Histone-lysine N-methyltransferase SETD1A	Setd1a	sp|E9PYH6|SET1A_MOUSE Histone-lysine N-methyltransferase SETD1A OS=Mus musculus OX=10090 GN=Setd1a PE=1 SV=1	1	0	16.8695	0.000674306	67.995	58.464	42.947	0.5	0	0.00219701	52.814	0.63036	2.3181	0.00209999	53.554	0.5	0	0.00151839	57.989	0.551834	0.903689	0.00560064	44.788	1	16.8695	0.00117743	58.079	1	13.6294	0.000733195	67.995	1	25.155	0.00798272	53.567	0.5	0	0.00559104	44.807	1	21.7502	0.00276115	50.397
E9PYH6	481	E9PYH6	E9PYH6	Histone-lysine N-methyltransferase SETD1A	Setd1a	sp|E9PYH6|SET1A_MOUSE Histone-lysine N-methyltransferase SETD1A OS=Mus musculus OX=10090 GN=Setd1a PE=1 SV=1	0.475023	0.141536	0.542541	1.16201e-05	73.036	59.848	73.036									0.439178	0.478884	0.00838407	42.106													0.475023	0.542541	1.16201e-05	73.036					0.391608	0.307639	0.000299717	50.229
E9PYH6	517	E9PYH6	E9PYH6	Histone-lysine N-methyltransferase SETD1A	Setd1a	sp|E9PYH6|SET1A_MOUSE Histone-lysine N-methyltransferase SETD1A OS=Mus musculus OX=10090 GN=Setd1a PE=1 SV=1	0.223219	0.242324	0	0.00662692	44.258	36.546	44.258	0.223219	0	0.00662692	44.258
E9PYH6	521	E9PYH6	E9PYH6	Histone-lysine N-methyltransferase SETD1A	Setd1a	sp|E9PYH6|SET1A_MOUSE Histone-lysine N-methyltransferase SETD1A OS=Mus musculus OX=10090 GN=Setd1a PE=1 SV=1	0.223219	0.242423	0	0.00662692	44.258	36.546	44.258	0.223219	0	0.00662692	44.258
E9PYL2	859	E9PYL2	E9PYL2	Proline-rich protein 12	Prr12	sp|E9PYL2|PRR12_MOUSE Proline-rich protein 12 OS=Mus musculus OX=10090 GN=Prr12 PE=1 SV=1	0.649414	0.068915	2.67726	0.0048482	63.091	39.865	58.674													0.514563	0.253053	0.0048482	63.091
E9PYL2	1069	E9PYL2	E9PYL2	Proline-rich protein 12	Prr12	sp|E9PYL2|PRR12_MOUSE Proline-rich protein 12 OS=Mus musculus OX=10090 GN=Prr12 PE=1 SV=1	0.475403	0.141357	0	0.00580404	76.064	49.68	76.064					0.475403	0	0.00580404	76.064	0	0		#NUM!					0	0		#NUM!
E9PYL2	1070	E9PYL2	E9PYL2	Proline-rich protein 12	Prr12	sp|E9PYL2|PRR12_MOUSE Proline-rich protein 12 OS=Mus musculus OX=10090 GN=Prr12 PE=1 SV=1	0.752606	0.0427717	6.96607	0.00580404	76.064	49.68	55.549					0.475403	0	0.00580404	76.064	0	0		#NUM!	0.752606	6.96607	0.0282735	55.549	0	0		#NUM!	0.496587	2.95101	0.0267791	56.729
E9PZM7	498	E9PZM7	E9PZM7		Scaf11	tr|E9PZM7|E9PZM7_MOUSE SR-related CTD-associated factor 11 OS=Mus musculus OX=10090 GN=Scaf11 PE=1 SV=1	0.999998	6.27012e-08	57.793	2.13654e-56	193.96	172.72	193.96	0.890141	11.1998	0.000522674	78.021	0.99999	51.5651	8.5579e-31	159.75	0.999998	57.793	2.13654e-56	193.96	0.969764	17.0036	0.000534228	77.514	0.986415	20.3237	1.80667e-09	116.13	0.99912	32.3029	4.65194e-16	133.23	0.998249	29.3026	4.82703e-23	147.16	0.949993	14.8821	0.000280917	85.808	0.765489	7.3084	0.00143986	60.564
E9PZM7	857	E9PZM7	E9PZM7		Scaf11	tr|E9PZM7|E9PZM7_MOUSE SR-related CTD-associated factor 11 OS=Mus musculus OX=10090 GN=Scaf11 PE=1 SV=1	0.767158	0.0395651	6.27818	1.55161e-10	125.5	106.18	125.5									0.767158	6.27818	1.55161e-10	125.5
E9PZM7	859	E9PZM7	E9PZM7		Scaf11	tr|E9PZM7|E9PZM7_MOUSE SR-related CTD-associated factor 11 OS=Mus musculus OX=10090 GN=Scaf11 PE=1 SV=1	0.931218	0.00939207	12.4278	1.55161e-10	125.5	106.18	125.5									0.931218	12.4278	1.55161e-10	125.5
E9PZM7	821	E9PZM7	E9PZM7		Scaf11	tr|E9PZM7|E9PZM7_MOUSE SR-related CTD-associated factor 11 OS=Mus musculus OX=10090 GN=Scaf11 PE=1 SV=1	0.999501	4.00707e-05	35.2574	6.87226e-73	189.82	168.4	109.16	0.905703	14.1567	1.70022e-05	81.949	0.99072	22.0971	3.43304e-36	153.58	0.999501	35.2574	1.74821e-12	114.37	0.988035	24.3137	7.13015e-09	105.06	0.907629	12.3622	1.26234e-12	116.45	0.967005	17.1621	6.87226e-73	189.82	0.987931	21.4082	6.64399e-22	132.09	0.957646	18.3181	1.34144e-17	127.8	0.798545	11.0793	3.99677e-19	125.04
E9PZM7	823	E9PZM7	E9PZM7		Scaf11	tr|E9PZM7|E9PZM7_MOUSE SR-related CTD-associated factor 11 OS=Mus musculus OX=10090 GN=Scaf11 PE=1 SV=1	0.482772	0.138676	1.57465	3.58453e-36	122.19	112.43	122.19					0.318511	0	0.00182293	48.759									0	0		#NUM!	0	0		#NUM!					0.363283	0.202703	0.00345003	44.5
E9PZM7	827	E9PZM7	E9PZM7		Scaf11	tr|E9PZM7|E9PZM7_MOUSE SR-related CTD-associated factor 11 OS=Mus musculus OX=10090 GN=Scaf11 PE=1 SV=1	0.49891	0.127672	3.83606	8.42593e-05	72.474	69.429	72.474					0.337195	0	0.00182293	48.759					0.364607	0.882314	0.000374617	59.359	0	0		#NUM!	0.325873	0.314063	0.000146569	67.832	0.49891	3.83606	8.42593e-05	72.474
E9PZP8	1428	E9PZP8	E9PZP8		Herc1	tr|E9PZP8|E9PZP8_MOUSE HECT and RLD domain containing E3 ubiquitin protein ligase family member 1 OS=Mus musculus OX=10090 GN=Herc1 PE=1 SV=1	0.638716	0.0712107	2.47584	1.85516e-12	99.987	90.232	99.987					0.597641	1.7191	7.75609e-07	80.415	0.499932	0	1.02475e-05	81.379	0.497189	0	4.45156e-05	60.093					0.495384	0	7.00485e-05	59.228	0.638716	2.47584	1.85516e-12	99.987
E9PZP8	1510	E9PZP8	E9PZP8		Herc1	tr|E9PZP8|E9PZP8_MOUSE HECT and RLD domain containing E3 ubiquitin protein ligase family member 1 OS=Mus musculus OX=10090 GN=Herc1 PE=1 SV=1	0.407329	0.169948	0.691877	0.000323589	50.531	42.442	50.531	0	0		#NUM!									0.407329	0.691877	0.000323589	50.531
E9PZP8	1512	E9PZP8	E9PZP8		Herc1	tr|E9PZP8|E9PZP8_MOUSE HECT and RLD domain containing E3 ubiquitin protein ligase family member 1 OS=Mus musculus OX=10090 GN=Herc1 PE=1 SV=1	0.663729	0.0650732	5.9106	2.68618e-05	66.294	54.983	66.294	0	0		#NUM!	0.663729	5.9106	2.68618e-05	66.294																	0.439756	3.76845	0.00329036	54.732
E9Q0S6	1346	E9Q0S6	E9Q0S6	Tensin-1	Tns1	sp|E9Q0S6|TENS1_MOUSE Tensin-1 OS=Mus musculus OX=10090 GN=Tns1 PE=1 SV=1	0.971816	0.00336372	16.5337	0.000490864	74.147	59.225	74.147									0.663123	5.64274	0.000941801	63.827	0.855792	10.0654	0.000502242	73.498					0.839174	8.84843	0.00063713	69.522	0.706109	7.2755	0.00390563	47.754	0.722871	6.2067	0.000490864	74.12	0.971816	16.5337	0.000640839	74.147
E9Q137	302	E9Q137	E9Q137	Testis-expressed protein 264 homolog	Tex264	sp|E9Q137|TX264_MOUSE Testis-expressed protein 264 homolog OS=Mus musculus OX=10090 GN=Tex264 PE=2 SV=1	0.557761	0.0958479	1.0079	0.0122529	64.82	59.661	64.82																													0	0		#NUM!
E9Q1P8	71	E9Q1P8	E9Q1P8	Interferon regulatory factor 2-binding protein 2	Irf2bp2	sp|E9Q1P8|I2BP2_MOUSE Interferon regulatory factor 2-binding protein 2 OS=Mus musculus OX=10090 GN=Irf2bp2 PE=1 SV=1	0.850063	0.0222712	7.53841	6.71296e-12	100.36	95.811	93.043					0.618681	2.12899	2.02547e-07	83.633	0.850063	7.53841	4.53676e-11	93.043	0.640842	2.5161	6.71296e-12	100.36	0.603724	2.17849	0.000829638	44.931	0.607455	1.96123	9.23293e-05	56.562					0	0		#NUM!	0	0		#NUM!
E9Q1P8	250	E9Q1P8	E9Q1P8	Interferon regulatory factor 2-binding protein 2	Irf2bp2	sp|E9Q1P8|I2BP2_MOUSE Interferon regulatory factor 2-binding protein 2 OS=Mus musculus OX=10090 GN=Irf2bp2 PE=1 SV=1	0.974904	0.00297241	16.0286	4.44546e-70	159.65	148.5	124.82	0.533504	3.77169	3.84812e-05	63.625	0.956965	13.6558	2.23614e-33	130.71	0.695791	3.64588	1.92359e-55	142.72	0.873899	8.80974	2.52645e-13	101.58	0.609906	2.41146	2.17513e-07	80.439	0.81532	6.72686	4.44546e-70	159.65	0.935969	12.0567	1.26029e-32	124.79	0.832093	7.96006	1.28683e-16	104.51	0.931849	12.2524	1.16954e-16	105.17
E9Q1P8	343	E9Q1P8	E9Q1P8	Interferon regulatory factor 2-binding protein 2	Irf2bp2	sp|E9Q1P8|I2BP2_MOUSE Interferon regulatory factor 2-binding protein 2 OS=Mus musculus OX=10090 GN=Irf2bp2 PE=1 SV=1	1	0	12.2276	0.004721	67.964	58.309	40.552									1	28.5985	0.004721	67.964									1	12.2276	0.00801784	60.401
E9Q1P8	169	E9Q1P8	E9Q1P8	Interferon regulatory factor 2-binding protein 2	Irf2bp2	sp|E9Q1P8|I2BP2_MOUSE Interferon regulatory factor 2-binding protein 2 OS=Mus musculus OX=10090 GN=Irf2bp2 PE=1 SV=1	1	0	42.7425	5.89826e-07	101.67	77.259	100.77	1	40.7118	0.000374942	84.375	1	46.3622	0.000580449	78.234	1	39.1279	5.89826e-07	101.67	1	14.0909	0.00422844	49.537	1	12.9684	0.00175209	59.728	1	56.1454	0.000343411	95.067	1	32.3359	0.00128756	64.2	1	12.9684	0.00937392	42.059	1	9.58146	0.054309	56.215
E9Q2I4	456	E9Q2I4	E9Q2I4		Mideas	tr|E9Q2I4|E9Q2I4_MOUSE Mitotic deacetylase associated SANT domain protein OS=Mus musculus OX=10090 GN=Mideas PE=1 SV=1	1	3.92441e-10	77.557	8.45233e-20	144.97	97.785	117.78	0.990831	20.3368	7.5043e-05	89.846	1	77.557	8.45233e-20	144.97	0.999992	51.1873	1.00544e-06	119.47	0.999998	56.4334	1.70078e-10	138.05	0.999977	46.3094	2.80458e-06	115.8	1	77.557	2.17417e-07	117.78	0.999959	43.8732	4.09979e-09	126.07	0.999907	40.3364	5.23128e-09	124.43	0.999954	43.409	5.22625e-08	120.9
E9Q394	1890	E9Q394	E9Q394	A-kinase anchor protein 13	Akap13	sp|E9Q394|AKP13_MOUSE A-kinase anchor protein 13 OS=Mus musculus OX=10090 GN=Akap13 PE=1 SV=1	0.569791	0.0909094	1.50647	1.58799e-08	116.03	59.478	116.03																					0.569791	1.50647	1.58799e-08	116.03									0	0		#NUM!
E9Q394	1613	E9Q394	E9Q394	A-kinase anchor protein 13	Akap13	sp|E9Q394|AKP13_MOUSE A-kinase anchor protein 13 OS=Mus musculus OX=10090 GN=Akap13 PE=1 SV=1	0.786046	0.0365774	5.80872	1.89326e-07	104.03	98.045	87.49									0.621717	2.20667	0.000981786	61.181	0.652707	3.40228	0.00735969	48.354	0.770846	5.3116	0.000305057	75.55					0.665799	3.15532	0.000545786	73.21					0.70161	4.31537	0.000915376	65.097
E9Q394	2525	E9Q394	E9Q394	A-kinase anchor protein 13	Akap13	sp|E9Q394|AKP13_MOUSE A-kinase anchor protein 13 OS=Mus musculus OX=10090 GN=Akap13 PE=1 SV=1	0.447153	0.154202	0	0.00187703	59.512	50.416	59.512													0.447153	0	0.00187703	59.512													0.25	0	0.00431603	49.708
E9Q394	2527	E9Q394	E9Q394	A-kinase anchor protein 13	Akap13	sp|E9Q394|AKP13_MOUSE A-kinase anchor protein 13 OS=Mus musculus OX=10090 GN=Akap13 PE=1 SV=1	0.447153	0.154112	0	0.00187703	59.512	50.416	59.512													0.447153	0	0.00187703	59.512													0.25	0	0.00431603	49.708
E9Q394	2530	E9Q394	E9Q394	A-kinase anchor protein 13	Akap13	sp|E9Q394|AKP13_MOUSE A-kinase anchor protein 13 OS=Mus musculus OX=10090 GN=Akap13 PE=1 SV=1	0.290456	0.219174	0	0.00431603	50.178	41.381	47.204																													0.25	0	0.00431603	49.708
E9Q394	2531	E9Q394	E9Q394	A-kinase anchor protein 13	Akap13	sp|E9Q394|AKP13_MOUSE A-kinase anchor protein 13 OS=Mus musculus OX=10090 GN=Akap13 PE=1 SV=1	0.290456	0.21927	0	0.00431603	50.178	41.381	47.204																													0.25	0	0.00431603	49.708
E9Q3L2	233	E9Q3L2	E9Q3L2	Phosphatidylinositol 4-kinase alpha	Pi4ka	sp|E9Q3L2|PI4KA_MOUSE Phosphatidylinositol 4-kinase alpha OS=Mus musculus OX=10090 GN=Pi4ka PE=1 SV=2	1	0	26.2681	0.0160577	45.68	28.313	45.68													1	26.2681	0.0160577	45.68
E9Q411	472	E9Q411	E9Q411		Nbas	tr|E9Q411|E9Q411_MOUSE Neuroblastoma amplified sequence OS=Mus musculus OX=10090 GN=Nbas PE=1 SV=1	0.580915	0.0873066	2.55331	9.14308e-06	84.493	71.513	84.493									0.580915	2.55331	9.14308e-06	84.493
E9Q4F7	1777	E9Q4F7	E9Q4F7	Ankyrin repeat domain-containing protein 11	Ankrd11	sp|E9Q4F7|ANR11_MOUSE Ankyrin repeat domain-containing protein 11 OS=Mus musculus OX=10090 GN=Ankrd11 PE=1 SV=1	0.997339	0.000285271	25.7375	0.00843192	97.431	25.929	97.431	0.997339	25.7375	0.00843192	97.431	0.972558	15.495	0.0116519	76.064	0	0		#NUM!	0.992747	21.363	0.038272	83.948	0.994956	22.9505	0.0844734	74.464	0.958906	13.68	0.0376024	57.59									0.980311	16.9714	0.019575	65.224
E9Q4N7	1612	E9Q4N7	E9Q4N7	AT-rich interactive domain-containing protein 1B	Arid1b	sp|E9Q4N7|ARI1B_MOUSE AT-rich interactive domain-containing protein 1B OS=Mus musculus OX=10090 GN=Arid1b PE=1 SV=2	0.992426	0.000829416	21.1736	0.00919112	67.113	28.546	67.113					0.992426	21.1736	0.00919112	67.113	0.97673	16.2299	0.0211444	56.359	0	0		#NUM!
E9Q512	1888	E9Q512	E9Q512		Trip11	tr|E9Q512|E9Q512_MOUSE Thyroid hormone receptor interactor 11 OS=Mus musculus OX=10090 GN=Trip11 PE=1 SV=1	1	4.19339e-09	68.7008	2.96879e-09	113.86	106.8	113.86	0.999709	35.3605	0.000525626	80.238	0.999937	41.9989	0.000887899	70.114	0.999157	30.7383	0.00113384	66.152	0.999907	40.3184	0.000742006	73.294	0.997166	25.4638	0.00213477	58.024	0.999995	52.6155	0.000405497	84.107	0.999985	48.3586	3.46033e-05	97.271	0.999986	48.506	0.00111899	67.168	0.993123	21.5962	0.00223484	56.708
E9Q5C9	563	E9Q5C9	E9Q5C9	Nucleolar and coiled-body phosphoprotein 1	Nolc1	sp|E9Q5C9|NOLC1_MOUSE Nucleolar and coiled-body phosphoprotein 1 OS=Mus musculus OX=10090 GN=Nolc1 PE=1 SV=1	1	0	187.872	0	456.46	437.53	456.46					0.999996	54.5026	6.22995e-08	113.73	1	197.707	0	388.81	0.999697	35.1799	5.79312e-21	141					1	193.372	0	372.24	1	171.28	1.48124e-299	320.88
E9Q5C9	625	E9Q5C9	E9Q5C9	Nucleolar and coiled-body phosphoprotein 1	Nolc1	sp|E9Q5C9|NOLC1_MOUSE Nucleolar and coiled-body phosphoprotein 1 OS=Mus musculus OX=10090 GN=Nolc1 PE=1 SV=1	1	0	18.7212	0.000644349	76.282	44.439	53.756	0.5	0	0.0106742	55.314	1	29.4372	0.0123536	53.327	1	29.4372	0.0168941	53.756	1	29.4372	0.0174263	53.327	1	35.6123	0.0213903	50.473	1	51.488	0.00701546	63.184	1	32.8978	0.014096	56.013	1	26.0207	0.0058451	66.621	1	20.5809	0.031849	45.161
E9Q5C9	626	E9Q5C9	E9Q5C9	Nucleolar and coiled-body phosphoprotein 1	Nolc1	sp|E9Q5C9|NOLC1_MOUSE Nucleolar and coiled-body phosphoprotein 1 OS=Mus musculus OX=10090 GN=Nolc1 PE=1 SV=1	1	0	18.7212	0.000267218	130.53	72.452	53.756	0.985378	18.2859	0.0106742	71.379	1	29.4372	0.0123536	91.853	1	29.4372	0.0168941	93.429	1	29.4372	0.0123536	80.438	1	35.6123	0.0190403	84.368	1	51.488	0.00198202	115.42	1	32.8978	0.014096	79.474	1	26.0207	0.0058451	69.825	1	20.5809	0.00363561	79.474
E9Q5C9	701	E9Q5C9	E9Q5C9	Nucleolar and coiled-body phosphoprotein 1	Nolc1	sp|E9Q5C9|NOLC1_MOUSE Nucleolar and coiled-body phosphoprotein 1 OS=Mus musculus OX=10090 GN=Nolc1 PE=1 SV=1	0.999997	1.09086e-07	55.9105	4.00783e-123	248.75	228.01	248.75	0.999978	46.4798	3.98973e-78	216.71	0.999928	41.4104	1.04616e-66	207.92	0.999975	46.0267	8.58842e-43	179.9	0.999268	31.3493	1.09527e-37	163.91	0.999997	55.9105	4.00783e-123	248.75	0.999799	36.964	2.83696e-19	149	0.999966	44.6433	5.1629e-57	198.95	0.999666	34.7657	5.74159e-78	213.94	0.999965	44.5523	1.84015e-49	191.51
E9Q5F9	532	E9Q5F9	E9Q5F9	Histone-lysine N-methyltransferase SETD2	Setd2	sp|E9Q5F9|SETD2_MOUSE Histone-lysine N-methyltransferase SETD2 OS=Mus musculus OX=10090 GN=Setd2 PE=1 SV=1	1	0	16.5659	0.00344045	76.332	66.544	52.247	1	23.3397	0.0965625	43.544	1	32.5181	0.0131471	55.452	1	46.34	0.011704	57.003													1	32.5181	0.00344045	76.332
E9Q5F9	753	E9Q5F9	E9Q5F9	Histone-lysine N-methyltransferase SETD2	Setd2	sp|E9Q5F9|SETD2_MOUSE Histone-lysine N-methyltransferase SETD2 OS=Mus musculus OX=10090 GN=Setd2 PE=1 SV=1	0.94023	0.00775228	11.9675	0.00110626	50.827	44.323	50.827									0.94023	11.9675	0.00110626	50.827	0	0		#NUM!
E9Q5F9	633	E9Q5F9	E9Q5F9	Histone-lysine N-methyltransferase SETD2	Setd2	sp|E9Q5F9|SETD2_MOUSE Histone-lysine N-methyltransferase SETD2 OS=Mus musculus OX=10090 GN=Setd2 PE=1 SV=1	1	0	31.6536	1.73672e-22	139.46	121.21	101.47	1	14.0909	0.00448015	43.349	1	41.7939	2.08745e-18	131.33	1	78.4999	1.73672e-22	139.46	1	43.2531	4.91863e-08	101.41	1	19.4679	0.000296355	65.425	1	32.9037	7.31532e-05	78.837	1	54.723	2.64855e-09	109.39					1	29.341	1.3121e-06	93.583
E9Q5G3	160	E9Q5G3	E9Q5G3	Kinesin-like protein KIF23	Kif23	sp|E9Q5G3|KIF23_MOUSE Kinesin-like protein KIF23 OS=Mus musculus OX=10090 GN=Kif23 PE=1 SV=1	0.5662	0.0918235	1.15679	0.00419578	51.819	44.286	51.819					0.5662	1.15679	0.00419578	51.819
E9Q5K9	309	E9Q5K9	E9Q5K9	YTH domain-containing protein 1	Ythdc1	sp|E9Q5K9|YTDC1_MOUSE YTH domain-containing protein 1 OS=Mus musculus OX=10090 GN=Ythdc1 PE=1 SV=2	1	0	78.1156	0.00018033	134.57	114.28	121.61	1	66.5496	0.000371415	95.483	1	94.801	0.00024752	120.63	1	70.3208	0.000405312	94.465	1	70.3208	0.000296458	97.734	1	55.8385	0.000197898	103.34	1	66.5496	0.000760993	86.879	1	70.3208	0.000405312	94.465	1	57.2038	0.000985729	82.831	1	70.3208	0.000225083	104.82
E9Q5K9	417	E9Q5K9	E9Q5K9	YTH domain-containing protein 1	Ythdc1	sp|E9Q5K9|YTDC1_MOUSE YTH domain-containing protein 1 OS=Mus musculus OX=10090 GN=Ythdc1 PE=1 SV=2	0.256705	0.230598	0	7.15184e-05	51.296	39.984	51.296					0	0		#NUM!																	0.256705	0	7.15184e-05	51.296
E9Q5K9	418	E9Q5K9	E9Q5K9	YTH domain-containing protein 1	Ythdc1	sp|E9Q5K9|YTDC1_MOUSE YTH domain-containing protein 1 OS=Mus musculus OX=10090 GN=Ythdc1 PE=1 SV=2	0.384589	0.180634	0.649901	1.14256e-35	100.95	84.148	78.942					0.384589	0.649901	4.92317e-07	78.942													0.382527	0.820011	1.14256e-35	100.95	0.256705	0	7.15184e-05	51.296
E9Q5K9	420	E9Q5K9	E9Q5K9	YTH domain-containing protein 1	Ythdc1	sp|E9Q5K9|YTDC1_MOUSE YTH domain-containing protein 1 OS=Mus musculus OX=10090 GN=Ythdc1 PE=1 SV=2	0.256705	0.2305	0	7.15184e-05	51.296	39.984	51.296					0	0		#NUM!																	0.256705	0	7.15184e-05	51.296
E9Q5K9	425	E9Q5K9	E9Q5K9	YTH domain-containing protein 1	Ythdc1	sp|E9Q5K9|YTDC1_MOUSE YTH domain-containing protein 1 OS=Mus musculus OX=10090 GN=Ythdc1 PE=1 SV=2	0.990913	0.0010256	22.39	2.21098e-67	167.27	155.04	147.22	0.738833	9.32872	6.61813e-17	107.01	0.977912	19.1885	1.46548e-28	123.89	0.990913	22.39	1.02372e-44	147.22	0.930322	16.0358	1.49076e-28	122.53	0.741552	6.1104	1.35492e-28	124.5	0.986993	21.3159	7.61983e-36	137.03	0.976447	18.5098	2.21098e-67	167.27	0.746728	7.81667	1.16166e-22	117.82	0.835131	11.0507	4.56677e-08	85.537
E9Q616	5522	E9Q616	E9Q616		Ahnak	tr|E9Q616|E9Q616_MOUSE AHNAK nucleoprotein OS=Mus musculus OX=10090 GN=Ahnak PE=1 SV=1	0.999969	2.02396e-06	48.1043	4.40424e-270	297.5	269.89	216.67	0.999726	38.6332	5.39627e-104	209.2	0.999969	48.1043	2.59695e-115	216.67	0.999026	32.2785	6.81627e-70	172.54	0.997416	27.535	1.49202e-82	189.02	0.999364	32.9702	9.98473e-129	228.36	0.998812	30.4813	2.99904e-29	136.3	0.998607	29.3299	4.40424e-270	297.5	0.997008	28.2382	8.55123e-70	181.24	0.997579	29.1609	1.46859e-52	185.96
E9Q616	5525	E9Q616	E9Q616		Ahnak	tr|E9Q616|E9Q616_MOUSE AHNAK nucleoprotein OS=Mus musculus OX=10090 GN=Ahnak PE=1 SV=1	1	3.61415e-12	96.6652	0	367.31	346.92	367.31	1	75.5944	5.39627e-104	212.69	1	89.9671	2.84455e-135	250.26	1	81.7159	5.61405e-246	303.59	1	71.8237	8.45834e-155	263.2	1	71.9876	6.9446e-154	261.15	1	96.6652	0	367.31	1	85.6832	4.40424e-270	297.5	1	71.7056	1.53611e-78	206.62	0.999988	51.9207	1.31354e-78	207.53
E9Q616	5535	E9Q616	E9Q616		Ahnak	tr|E9Q616|E9Q616_MOUSE AHNAK nucleoprotein OS=Mus musculus OX=10090 GN=Ahnak PE=1 SV=1	0.616109	0.0772833	2.0548	3.30789e-05	78.848	60.252	78.848	0.434203	0	9.83573e-05	57.845					0	0		#NUM!	0	0		#NUM!	0	0		#NUM!	0.499986	0	0.00267063	68.83	0	0		#NUM!	0.438475	0	5.82756e-05	60.728	0	0		#NUM!
E9Q616	5536	E9Q616	E9Q616		Ahnak	tr|E9Q616|E9Q616_MOUSE AHNAK nucleoprotein OS=Mus musculus OX=10090 GN=Ahnak PE=1 SV=1	0.908731	0.0129655	10.0022	0	339.53	273.14	98.968	0.850759	7.55918	8.41253e-187	264.1	0.84842	7.47969	0	339.53	0.849197	7.50599	1.91472e-284	309.23	0.850029	7.53427	0	317.83	0.850081	7.53603	6.04066e-258	296.75	0.849212	7.50648	3.96821e-284	304.05	0.849779	7.52576	5.74444e-257	294.12	0.849674	7.52219	1.66512e-187	271.72	0.84428	7.34141	1.16759e-166	255.99
E9Q616	5542	E9Q616	E9Q616		Ahnak	tr|E9Q616|E9Q616_MOUSE AHNAK nucleoprotein OS=Mus musculus OX=10090 GN=Ahnak PE=1 SV=1	1	0	64.9268	0.0130983	106.18	74.8	74.267	1	49.5272	0.0402895	68.371	1	68.7599	0.0229825	85.807					1	85.7644	0.0130983	106.18	1	91.0848	0.0209293	91.265	0	0		#NUM!	0	0		#NUM!	0	0		#NUM!	1	67.0807	0.0436605	67.081
E9Q616	178	E9Q616	E9Q616		Ahnak	tr|E9Q616|E9Q616_MOUSE AHNAK nucleoprotein OS=Mus musculus OX=10090 GN=Ahnak PE=1 SV=1	0.5	0.119266	0	0.000376607	69.522	57.671	50.387													0.5	0	0.00248058	53.278	0.5	0	0.0064786	48.112					0.5	0	0.000376607	69.522					0.5	0	0.00560174	44.863
E9Q616	4766	E9Q616	E9Q616		Ahnak	tr|E9Q616|E9Q616_MOUSE AHNAK nucleoprotein OS=Mus musculus OX=10090 GN=Ahnak PE=1 SV=1	1	0	47.7243	0.000523546	105.13	105.13	81.525	1	45.6025	0.00675131	76.927	1	68.4357	0.001517	89.561	1	72.1868	0.000571896	105.13	1	72.1868	0.000781835	97.163	1	42.8623	0.00302842	80.979	1	79.8602	0.000523546	104.07	1	54.2591	0.0014703	89.9	1	64.6877	0.00216064	84.882	1	72.1868	0.0019735	86.243
E9Q616	893	E9Q616	E9Q616		Ahnak	tr|E9Q616|E9Q616_MOUSE AHNAK nucleoprotein OS=Mus musculus OX=10090 GN=Ahnak PE=1 SV=1	1	0	2.99754	4.24469e-14	118.35	108.69	45.784									1	27.5834	0.000122157	68.552	1	6.88635	0.0029363	45.011	1	10.9014	0.00103144	50.539	1	11.8762	0.000197605	63.165	1	12.5633	0.000498781	56.766
E9Q616	5596	E9Q616	E9Q616		Ahnak	tr|E9Q616|E9Q616_MOUSE AHNAK nucleoprotein OS=Mus musculus OX=10090 GN=Ahnak PE=1 SV=1	0.999936	4.77067e-06	41.9667	3.02171e-40	202.24	177.39	83.226	0.713001	3.97131	0.000620395	72.421	0.99836	27.8453	3.76948e-17	152.02	0.999145	30.6757	1.28225e-13	141.73	0.999391	32.1478	3.56223e-20	164.65	0.999564	33.5992	1.50621e-05	114.56	0.999936	41.9667	4.89045e-08	127.79	0.999856	38.4216	3.02171e-40	202.24	0.998325	27.7534	1.88841e-17	156.08	0.927592	11.0764	3.10071e-12	133.16
E9Q616	5598	E9Q616	E9Q616		Ahnak	tr|E9Q616|E9Q616_MOUSE AHNAK nucleoprotein OS=Mus musculus OX=10090 GN=Ahnak PE=1 SV=1	0.578379	0.0891027	1.38647	0.000534354	68.243	55.682	61.477	0	0		#NUM!					0.499818	0	0.000534354	68.243
E9Q616	4890	E9Q616	E9Q616		Ahnak	tr|E9Q616|E9Q616_MOUSE AHNAK nucleoprotein OS=Mus musculus OX=10090 GN=Ahnak PE=1 SV=1	1	0	30.5553	3.74199e-16	162.88	132.95	83.905	1	17.2157	3.72679e-08	122.97	1	27.0083	1.62376e-10	136.17	1	30.5553	3.74199e-16	160.46	1	144.409	4.65745e-11	150.85	1	18.1351	4.8298e-06	119.88	1	27.0083	1.74653e-12	161.41	1	38.9939	2.81181e-14	162.88	1	23.6725	1.90581e-10	143.76	1	61.0821	1.5868e-10	135.81
E9Q616	3140	E9Q616	E9Q616		Ahnak	tr|E9Q616|E9Q616_MOUSE AHNAK nucleoprotein OS=Mus musculus OX=10090 GN=Ahnak PE=1 SV=1	0.844531	0.0233497	7.49918	3.63556e-05	129.82	94.277	105.13					0.526056	3.46335	0.0239468	61.344	0.844531	7.49918	3.63556e-05	129.82	0.533605	3.59496	0.017374	67.214	0.637875	3.63203	0.010654	60.691	0.551555	2.77695	0.0604632	44.612
E9Q616	3088	E9Q616	E9Q616		Ahnak	tr|E9Q616|E9Q616_MOUSE AHNAK nucleoprotein OS=Mus musculus OX=10090 GN=Ahnak PE=1 SV=1	0.938189	0.00811772	11.8123	0.000486407	106.6	63.73	96.668																	0.488689	0	0.000486407	73.809	0.938189	11.8123	0.00842867	96.668	0.887453	8.96813	0.00499195	106.6
E9Q616	3090	E9Q616	E9Q616		Ahnak	tr|E9Q616|E9Q616_MOUSE AHNAK nucleoprotein OS=Mus musculus OX=10090 GN=Ahnak PE=1 SV=1	0.488689	0.136003	0	0.000486407	73.809	61.524	73.809																	0.488689	0	0.000486407	73.809
E9Q616	5098	E9Q616	E9Q616		Ahnak	tr|E9Q616|E9Q616_MOUSE AHNAK nucleoprotein OS=Mus musculus OX=10090 GN=Ahnak PE=1 SV=1	0.760504	0.0415402	5.8798	5.16247e-11	101.62	74.909	72.731	0	0		#NUM!	0.444171	0	0.00343278	47.016	0.493071	0	2.16089e-07	83.806	0.50703	1.07596	2.3027e-07	82.554	0	0		#NUM!	0.760504	5.8798	0.000160065	101.62	0.515198	1.26242	5.16247e-11	92.387	0	0		#NUM!
E9Q616	5099	E9Q616	E9Q616		Ahnak	tr|E9Q616|E9Q616_MOUSE AHNAK nucleoprotein OS=Mus musculus OX=10090 GN=Ahnak PE=1 SV=1	0.906161	0.0134713	11.3805	7.53438e-23	139.78	120.48	114.24	0.546137	2.69327	0.00192673	54.875	0.906161	11.3805	1.85829e-10	119.62	0.825147	9.74889	9.69986e-18	139.78	0.733345	6.49917	7.53438e-23	113.65	0.425361	0.059175	0.00134093	59.342	0.777003	8.43157	1.392e-05	101.62	0.742892	7.30834	0.000241373	100.11	0	0		#NUM!
E9Q616	5101	E9Q616	E9Q616		Ahnak	tr|E9Q616|E9Q616_MOUSE AHNAK nucleoprotein OS=Mus musculus OX=10090 GN=Ahnak PE=1 SV=1	0.309891	0.212129	0	0.0011147	49.199	42.22	49.199	0	0		#NUM!	0	0		#NUM!	0	0		#NUM!	0.309891	0	0.0011147	49.199	0	0		#NUM!	0	0		#NUM!	0	0		#NUM!	0	0		#NUM!
E9Q616	5518	E9Q616	E9Q616		Ahnak	tr|E9Q616|E9Q616_MOUSE AHNAK nucleoprotein OS=Mus musculus OX=10090 GN=Ahnak PE=1 SV=1	0.561204	0.0945684	0	1.67826e-13	106.62	96.702	48.115					0.561204	0	0.000492157	48.115	0	0		#NUM!					0.326964	0	1.70106e-07	84.169									0.325632	0	1.67826e-13	106.62	0.284709	0	3.13229e-06	74.206
E9Q616	5519	E9Q616	E9Q616		Ahnak	tr|E9Q616|E9Q616_MOUSE AHNAK nucleoprotein OS=Mus musculus OX=10090 GN=Ahnak PE=1 SV=1	0.561348	0.094477	0	1.67826e-13	106.62	96.702	48.115					0.561348	0	0.000492157	48.115	0	0		#NUM!					0.326964	0	1.70106e-07	84.169									0.325632	0	1.67826e-13	106.62	0.284709	0	3.13229e-06	74.206
E9Q616	94	E9Q616	E9Q616		Ahnak	tr|E9Q616|E9Q616_MOUSE AHNAK nucleoprotein OS=Mus musculus OX=10090 GN=Ahnak PE=1 SV=1	1	5.57052e-16	130.048	0	383.69	350.29	248.4	1	77.6277	1.00837e-150	253.35	1	87.052	3.23801e-258	300.27	1	86.2947	0	383.69	1	119.831	4.87073e-285	305.91	1	106.133	7.13473e-209	277.6	1	96.0485	3.03514e-233	292.57	1	115.817	0	332.95	1	127.705	5.86603e-285	304.24	1	106.947	3.80897e-258	299.62
E9Q616	5504	E9Q616	E9Q616		Ahnak	tr|E9Q616|E9Q616_MOUSE AHNAK nucleoprotein OS=Mus musculus OX=10090 GN=Ahnak PE=1 SV=1	0.999999	2.38861e-08	61.7569	3.76612e-165	260.58	231.79	194.77	0.999859	39.7192	5.24486e-49	158.47	0.999955	46.2232	3.37694e-116	215.53	0.999988	49.307	3.17293e-102	222.11	0.999985	48.2915	2.16635e-161	248.29	0.999971	46.9829	4.47238e-116	213.1	0.999934	41.89	1.17153e-116	220.42	0.999999	61.7569	2.52133e-130	232.04	0.999557	35.4762	9.98519e-117	220.8	0.999825	37.6302	2.69347e-83	186.68
E9Q616	5512	E9Q616	E9Q616		Ahnak	tr|E9Q616|E9Q616_MOUSE AHNAK nucleoprotein OS=Mus musculus OX=10090 GN=Ahnak PE=1 SV=1	0.607893	0.0798705	2.19956	6.876e-05	73.574	64.013	43.516					0	0		#NUM!	0	0		#NUM!	0.607893	2.19956	0.00207027	43.516					0.591524	2.26325	6.876e-05	73.574	0.578003	2.17787	0.000123658	67.217
E9Q616	5607	E9Q616	E9Q616		Ahnak	tr|E9Q616|E9Q616_MOUSE AHNAK nucleoprotein OS=Mus musculus OX=10090 GN=Ahnak PE=1 SV=1	0.999789	1.66611e-05	36.7493	1.14604e-276	285.45	271.3	214.95	0.99972	35.5277	3.50079e-135	205.81	0.995585	23.5326	9.12695e-148	265.62	0.999617	34.1996	1.14604e-276	285.45	0.999789	36.7493	4.2e-231	266.81	0.99796	26.9723	8.3389e-161	228.34	0.999082	30.3768	7.97761e-136	211.87	0.996792	24.9655	2.01417e-160	228.33	0.998495	28.3016	6.21631e-176	239.56	0.998522	28.316	1.79222e-211	261.71
E9Q616	5623	E9Q616	E9Q616		Ahnak	tr|E9Q616|E9Q616_MOUSE AHNAK nucleoprotein OS=Mus musculus OX=10090 GN=Ahnak PE=1 SV=1	0.860873	0.0205528	8.80692	0.000107766	55.951	53.41	55.951					0.82991	8.27831	0.000131042	53.867	0.860873	8.80692	0.000107766	55.951	0	0		#NUM!	0	0		#NUM!	0	0		#NUM!	0	0		#NUM!	0	0		#NUM!	0	0		#NUM!
E9Q616	5333	E9Q616	E9Q616		Ahnak	tr|E9Q616|E9Q616_MOUSE AHNAK nucleoprotein OS=Mus musculus OX=10090 GN=Ahnak PE=1 SV=1	0.997004	0.000317079	25.3799	5.373e-05	69.47	61.848	62.107					0.961896	15.3495	0.000804686	69.47													0.997004	25.3799	5.373e-05	62.107	0.995216	23.3548	0.000849961	69.052
E9Q616	2985	E9Q616	E9Q616		Ahnak	tr|E9Q616|E9Q616_MOUSE AHNAK nucleoprotein OS=Mus musculus OX=10090 GN=Ahnak PE=1 SV=1	0.993136	0.000761533	21.6041	3.87357e-05	72.29	50.918	54.343													0.911528	10.1297	0.000993482	44.683					0.993136	21.6041	3.87357e-05	65.213	0.986858	18.7559	5.86258e-05	72.29
E9Q616	211	E9Q616	E9Q616		Ahnak	tr|E9Q616|E9Q616_MOUSE AHNAK nucleoprotein OS=Mus musculus OX=10090 GN=Ahnak PE=1 SV=1	0.998085	0.000177113	27.1689	1.70886e-159	246.42	205.93	185.28	0.506963	2.08921	6.85136e-80	152.76	0.907458	9.93074	1.03835e-130	214.15	0.910409	10.078	1.13939e-146	246.42	0.690108	3.47707	3.93991e-62	170.89	0.886407	8.97538	1.22838e-50	159.26	0.945263	12.5294	1.63995e-146	243.37	0.71934	4.08718	4.78563e-131	213.52	0.825453	6.7521	1.25961e-144	231.2	0.686626	4.92785	9.71904e-36	135.08
E9Q616	213	E9Q616	E9Q616		Ahnak	tr|E9Q616|E9Q616_MOUSE AHNAK nucleoprotein OS=Mus musculus OX=10090 GN=Ahnak PE=1 SV=1	0.999997	1.06114e-07	56.003	0	383.99	362.59	383.99	0.999446	32.6042	2.73249e-260	293.22	0.99998	48.5189	0	337.82	0.999513	34.7013	2.29373e-259	288.73	0.999812	37.3255	3.52275e-253	273.92	0.998907	29.5586	1.45011e-175	252.32	0.999997	56.003	0	383.99	0.999911	40.4931	0	341.19	0.999601	34.0705	7.66701e-237	283.37	0.998327	27.7937	2.75608e-107	193.15
E9Q616	217	E9Q616	E9Q616		Ahnak	tr|E9Q616|E9Q616_MOUSE AHNAK nucleoprotein OS=Mus musculus OX=10090 GN=Ahnak PE=1 SV=1	0.999954	3.32077e-06	43.4569	0	434.23	383.28	434.23	0.9974	26.5861	0	328.48	0.998827	29.6132	0	349.21	0.995477	23.5566	0	323.9	0.999954	43.4569	0	434.23	0.997302	25.696	0	356.83	0.999759	37.0547	0	409.89	0.999786	36.7461	0	348.06	0.992806	21.6233	0	319.32	0.990777	20.3541	0	322.33
E9Q616	5553	E9Q616	E9Q616		Ahnak	tr|E9Q616|E9Q616_MOUSE AHNAK nucleoprotein OS=Mus musculus OX=10090 GN=Ahnak PE=1 SV=1	0.999915	5.89117e-06	40.4966	0	336.66	316.16	330.9	0.957177	13.5162	0	336.66	0.992501	20.1378	1.55697e-228	253.87	0.985446	17.3067	1.42178e-148	207.96	0.991437	18.0701	2.18015e-294	279.69	0.984319	17.4855	1.04861e-193	239.63	0.999915	40.4966	0	330.9	0.997941	26.6667	0	332.55	0.97836	14.7985	2.46232e-148	204.34	0.970976	15.6011	0	311.09
E9Q616	5555	E9Q616	E9Q616		Ahnak	tr|E9Q616|E9Q616_MOUSE AHNAK nucleoprotein OS=Mus musculus OX=10090 GN=Ahnak PE=1 SV=1	0.999577	3.5334e-05	34.2185	0	332.55	320.14	83.438	0.994451	22.7636	1.01898e-131	200.23	0.991827	21.2416	3.98249e-293	288.13	0.985512	18.9473	0	310.77	0.962782	14.7533	9.63011e-194	239.74	0.995913	23.8959	1.04861e-193	239.63	0.992467	21.2416	0	330.9	0.949397	13.3775	0	332.55	0.991209	23.5314	1.47118e-208	241.63	0.999577	34.2185	1.56444e-148	204.44
E9Q616	5557	E9Q616	E9Q616		Ahnak	tr|E9Q616|E9Q616_MOUSE AHNAK nucleoprotein OS=Mus musculus OX=10090 GN=Ahnak PE=1 SV=1	0.588035	0.0852435	0	2.18015e-294	279.69	263.91	146.56	0.443294	1.43253	3.50897e-84	157.42	0.320121	0	7.03803e-25	119.39	0.175323	0	1.62648e-05	64.668	0.553413	0.896182	2.18015e-294	279.69	0.565891	0	6.2739e-56	144	0.452858	0	0.0126449	49.088	0.533978	0	3.21477e-70	157.19	0.379307	0	0.000119299	52.226	0	0		#NUM!
E9Q616	5563	E9Q616	E9Q616		Ahnak	tr|E9Q616|E9Q616_MOUSE AHNAK nucleoprotein OS=Mus musculus OX=10090 GN=Ahnak PE=1 SV=1	0.452858	0.152762	0	2.12283e-05	61.89	54.803	49.088	0	0		#NUM!	0	0		#NUM!	0	0		#NUM!	0	0		#NUM!	0.42359	0	0.033777	42.863	0.452858	0	0.0126449	49.088	0	0		#NUM!	0.379307	0	0.0305935	43.801	0	0		#NUM!
E9Q616	5566	E9Q616	E9Q616		Ahnak	tr|E9Q616|E9Q616_MOUSE AHNAK nucleoprotein OS=Mus musculus OX=10090 GN=Ahnak PE=1 SV=1	0.44699	0.154472	0	0.0126449	49.088	43.876	49.088	0	0		#NUM!	0	0		#NUM!	0	0		#NUM!	0	0		#NUM!	0.405482	0	0.033777	42.863	0.44699	0	0.0126449	49.088	0	0		#NUM!	0.379307	0	0.0305935	43.801	0	0		#NUM!
E9Q616	5017	E9Q616	E9Q616		Ahnak	tr|E9Q616|E9Q616_MOUSE AHNAK nucleoprotein OS=Mus musculus OX=10090 GN=Ahnak PE=1 SV=1	1	0	15.4785	0.000321367	80.522	66.843	52.555	1	13.0579	0.00726629	53.967	1	31.7283	0.00183092	67.997	1	31.7283	0.0037339	61.212	1	27.8455	0.0021137	66.989	1	20.6479	0.00699364	54.524	1	30.4137	0.0020333	67.275	1	34.788	0.00450974	59.607	1	38.9631	0.000321367	80.522	1	11.9991	0.0154981	42.789
E9Q616	2381	E9Q616	E9Q616		Ahnak	tr|E9Q616|E9Q616_MOUSE AHNAK nucleoprotein OS=Mus musculus OX=10090 GN=Ahnak PE=1 SV=1	1	4.76088e-10	76.8101	1.70176e-09	122.49	108.83	122.49	0.999998	57.0584	0.00035853	81.618	1	69.9924	7.92228e-07	114.55	1	64.3314	4.36858e-07	117.84	0.999995	53.3781	2.24876e-07	119.8	0.999996	53.472	0.000188608	89.049	0.999992	51.0931	1.69669e-07	120.31	0.999999	62.2442	6.7402e-08	121.26	0.999913	40.597	0.00133436	66.777	1	76.8101	1.70176e-09	122.49
E9Q616	4905	E9Q616	E9Q616		Ahnak	tr|E9Q616|E9Q616_MOUSE AHNAK nucleoprotein OS=Mus musculus OX=10090 GN=Ahnak PE=1 SV=1	0.5	0.118319	0	7.38309e-05	61.109	48.306	61.109																					0.5	0	0.000166962	54.259	0.5	0	0.000188068	52.707
E9Q616	4906	E9Q616	E9Q616		Ahnak	tr|E9Q616|E9Q616_MOUSE AHNAK nucleoprotein OS=Mus musculus OX=10090 GN=Ahnak PE=1 SV=1	0.5	0.117749	0	7.38309e-05	61.109	48.306	61.109																					0.5	0	0.000166962	54.259	0.5	0	0.000188068	52.707
E9Q616	136	E9Q616	E9Q616		Ahnak	tr|E9Q616|E9Q616_MOUSE AHNAK nucleoprotein OS=Mus musculus OX=10090 GN=Ahnak PE=1 SV=1	1	0	205.788	0	457.25	386.72	415.69	1	163.882	0	342.34	1	231.306	0	388.9	1	188.773	0	366.66	1	221.483	0	454.88	1	225.05	0	444.53	1	172.416	0	368.83	1	168.468	0	381.27	1	160.925	0	369.61	1	169.516	0	393.88
E9Q616	4686	E9Q616	E9Q616		Ahnak	tr|E9Q616|E9Q616_MOUSE AHNAK nucleoprotein OS=Mus musculus OX=10090 GN=Ahnak PE=1 SV=1	0.801051	0.0329022	6.22302	0.00342276	45.011	35.089	45.011																					0.801051	6.22302	0.00342276	45.011
E9Q616	4879	E9Q616	E9Q616		Ahnak	tr|E9Q616|E9Q616_MOUSE AHNAK nucleoprotein OS=Mus musculus OX=10090 GN=Ahnak PE=1 SV=1	0.999812	1.45288e-05	37.2465	4.97696e-05	92.307	83.257	81.723									0.999072	30.3222	4.97696e-05	92.307	0.912638	10.1898	0.0102951	41.86	0.985097	18.202	0.00214	56.424					0.968668	14.9019	0.0021778	56.215					0	0		#NUM!
E9Q616	116	E9Q616	E9Q616		Ahnak	tr|E9Q616|E9Q616_MOUSE AHNAK nucleoprotein OS=Mus musculus OX=10090 GN=Ahnak PE=1 SV=1	1	8.4939e-12	94.1049	2.63731e-123	251.68	233.31	248.23	0.999991	50.7823	1.56898e-48	187.16	0.999897	39.9529	5.66295e-43	181.58	0.999998	58.0735	2.51244e-67	212.24	0.999279	31.4169	2.63787e-48	183.41	0.999998	56.9201	4.39653e-57	200.97	1	74.2794	2.13178e-56	193.98	1	75.7997	3.76327e-91	228.03	0.986789	19.6163	0.0126029	58.814	1	85.2384	3.76327e-91	228.03
E9Q616	4798	E9Q616	E9Q616		Ahnak	tr|E9Q616|E9Q616_MOUSE AHNAK nucleoprotein OS=Mus musculus OX=10090 GN=Ahnak PE=1 SV=1	0.999783	1.70069e-05	36.6331	1.19736e-55	146.59	144.82	146.59					0.959443	14.5229	3.88813e-06	79.616	0.921689	11.1535	2.53484e-05	69.551	0.99727	25.6507	7.76936e-17	107.59					0.990281	20.1433	6.1098e-06	78.531	0.957356	13.6719	3.69498e-11	93.759
E9Q634	1001	E9Q634	E9Q634	Unconventional myosin-Ie	Myo1e	sp|E9Q634|MYO1E_MOUSE Unconventional myosin-Ie OS=Mus musculus OX=10090 GN=Myo1e PE=1 SV=1	0.367227	0.187773	0	3.67415e-17	102.86	90.454	50.706	0.291611	0	0.000102917	59.017	0.204658	0	0.000757242	44.099	0.336661	0	3.67415e-17	102.86									0.358998	2.52762	4.52386e-06	75.893	0.280299	0	7.38995e-05	57.488	0.2176	0	0.000156725	50.935	0.18298	0	0.000780346	44.319
E9Q634	1004	E9Q634	E9Q634	Unconventional myosin-Ie	Myo1e	sp|E9Q634|MYO1E_MOUSE Unconventional myosin-Ie OS=Mus musculus OX=10090 GN=Myo1e PE=1 SV=1	0.280299	0.222921	0	7.38995e-05	57.488	50.207	57.488													0.268333	1.91856	0.000316714	48.931									0.280299	0	7.38995e-05	57.488					0.18298	0	0.000780346	44.319
E9Q634	1008	E9Q634	E9Q634	Unconventional myosin-Ie	Myo1e	sp|E9Q634|MYO1E_MOUSE Unconventional myosin-Ie OS=Mus musculus OX=10090 GN=Myo1e PE=1 SV=1	0.236603	0.23836	0	0.000235198	49.366	32.78	49.366					0.236603	0	0.000235198	49.366																									0.18298	0	0.000780346	44.319
E9Q6H8	1241	E9Q6H8	E9Q6H8		Plekha5	tr|E9Q6H8|E9Q6H8_MOUSE Pleckstrin homology domain containing, family A member 5 OS=Mus musculus OX=10090 GN=Plekha5 PE=1 SV=1	0.464579	0.145937	0.609071	4.38726e-05	80.316	68.524	80.316									0.464579	0.609071	4.38726e-05	80.316
E9Q6H8	1243	E9Q6H8	E9Q6H8		Plekha5	tr|E9Q6H8|E9Q6H8_MOUSE Pleckstrin homology domain containing, family A member 5 OS=Mus musculus OX=10090 GN=Plekha5 PE=1 SV=1	0.813028	0.0300342	8.14262	8.56623e-20	121.01	109.22	86.182					0.590737	2.06751	8.56623e-20	121.01									0.658764	6.59242	0.000226283	54.261					0.77628	7.86804	2.41279e-13	109.13	0.813028	8.14262	1.10581e-07	86.182
E9Q6H8	1020	E9Q6H8	E9Q6H8		Plekha5	tr|E9Q6H8|E9Q6H8_MOUSE Pleckstrin homology domain containing, family A member 5 OS=Mus musculus OX=10090 GN=Plekha5 PE=1 SV=1	0.733296	0.047471	6.2983	1.44865e-06	93.006	85.597	57.238	0.684849	4.47422	1.44865e-06	92.8	0.637347	4.33872	0.000124967	74.793	0.564198	3.43364	0.00120507	51.819	0.468698	1.12669	1.66753e-05	87.668	0.511634	2.7419	0.00017665	70.959	0.733296	6.2983	5.49298e-05	80.314	0.485829	4.72359	4.65434e-05	80.975	0.469227	2.352	0.000974382	60.991	0.530807	2.83428	2.36447e-05	85.881
E9Q6H8	417	E9Q6H8	E9Q6H8		Plekha5	tr|E9Q6H8|E9Q6H8_MOUSE Pleckstrin homology domain containing, family A member 5 OS=Mus musculus OX=10090 GN=Plekha5 PE=1 SV=1	0.683088	0.0591462	3.33538	0.0080333	56.359	43.481	56.359	0.673726	3.14901	0.0102798	52.278									0.683088	3.33538	0.0080333	56.359
E9Q6J5	2001	E9Q6J5	E9Q6J5	Biorientation of chromosomes in cell division protein 1-like 1	Bod1l	sp|E9Q6J5|BD1L1_MOUSE Biorientation of chromosomes in cell division protein 1-like 1 OS=Mus musculus OX=10090 GN=Bod1l PE=1 SV=1	0.993612	0.000701871	22.8207	1.77751e-06	74.698	63.641	62.683									0.993612	22.8207	3.49419e-05	62.683	0.680325	5.53386	0.00158575	44.931									0.921496	10.9074	0.0014999	45.332
E9Q6J5	795	E9Q6J5	E9Q6J5	Biorientation of chromosomes in cell division protein 1-like 1	Bod1l	sp|E9Q6J5|BD1L1_MOUSE Biorientation of chromosomes in cell division protein 1-like 1 OS=Mus musculus OX=10090 GN=Bod1l PE=1 SV=1	1	0	53.3167	0.000495414	122.44	59.555	82.645	1	73.1963	0.0168767	93.098	1	87.2582	0.00692881	108.81	1	108.262	0.00269477	112.3	1	81.9152	0.0168767	93.098	1	81.9152	0.00378162	111.06	1	81.9152	0.016948	101.46	1	117.761	0.000495414	122.44	1	91.0848	0.000497396	122.33	1	46.0223	0.0168745	92.838
E9Q6J5	656	E9Q6J5	E9Q6J5	Biorientation of chromosomes in cell division protein 1-like 1	Bod1l	sp|E9Q6J5|BD1L1_MOUSE Biorientation of chromosomes in cell division protein 1-like 1 OS=Mus musculus OX=10090 GN=Bod1l PE=1 SV=1	0.355394	0.191042	0	5.10843e-08	101.41	86.158	83.31					0.330779	0	0.000584821	59.512	0.333333	0	1.21685e-06	94.845					0.333222	0	9.15178e-07	96.544									0.331639	0	0.00122543	67.645
E9Q6J5	2909	E9Q6J5	E9Q6J5	Biorientation of chromosomes in cell division protein 1-like 1	Bod1l	sp|E9Q6J5|BD1L1_MOUSE Biorientation of chromosomes in cell division protein 1-like 1 OS=Mus musculus OX=10090 GN=Bod1l PE=1 SV=1	0.209817	0.245241	0	2.73604e-05	59.228	53.853	59.228																	0	0		#NUM!	0.209817	0	2.73604e-05	59.228
E9Q6J5	2912	E9Q6J5	E9Q6J5	Biorientation of chromosomes in cell division protein 1-like 1	Bod1l	sp|E9Q6J5|BD1L1_MOUSE Biorientation of chromosomes in cell division protein 1-like 1 OS=Mus musculus OX=10090 GN=Bod1l PE=1 SV=1	0.209817	0.24514	0	2.73604e-05	59.228	53.853	59.228																	0	0		#NUM!	0.209817	0	2.73604e-05	59.228
E9Q6J5	2920	E9Q6J5	E9Q6J5	Biorientation of chromosomes in cell division protein 1-like 1	Bod1l	sp|E9Q6J5|BD1L1_MOUSE Biorientation of chromosomes in cell division protein 1-like 1 OS=Mus musculus OX=10090 GN=Bod1l PE=1 SV=1	0.836413	0.0248973	11.4644	1.18538e-25	114.92	111.06	107.09	0.462101	3.93568	5.56129e-06	65.284	0.503147	3.20069	9.51193e-06	61.871					0.373059	2.49217	3.90148e-07	70.137	0	0		#NUM!	0.209817	0	2.73604e-05	59.228	0.518046	3.14821	1.18538e-25	114.92					0.79775	10.7202	0.000903661	40.056
E9Q6J5	480	E9Q6J5	E9Q6J5	Biorientation of chromosomes in cell division protein 1-like 1	Bod1l	sp|E9Q6J5|BD1L1_MOUSE Biorientation of chromosomes in cell division protein 1-like 1 OS=Mus musculus OX=10090 GN=Bod1l PE=1 SV=1	0.807119	0.0313427	10.3638	0.00240068	76.759	59.88	76.759																	0.807119	10.3638	0.00240068	76.759
E9Q6J5	482	E9Q6J5	E9Q6J5	Biorientation of chromosomes in cell division protein 1-like 1	Bod1l	sp|E9Q6J5|BD1L1_MOUSE Biorientation of chromosomes in cell division protein 1-like 1 OS=Mus musculus OX=10090 GN=Bod1l PE=1 SV=1	0.798021	0.0338041	10.3638	0.00240068	76.759	59.88	76.759																	0.798021	10.3638	0.00240068	76.759
E9Q6R7	933	E9Q6R7	E9Q6R7		Utrn	tr|E9Q6R7|E9Q6R7_MOUSE Utrophin OS=Mus musculus OX=10090 GN=Utrn PE=1 SV=1	1	0	23.4461	4.74195e-14	104.72	95.904	46.415					1	46.2213	4.80221e-07	79.365	1	55.5659	4.74195e-14	104.72	1	28.4001	1.50704e-10	97.057	1	23.0977	2.69595e-05	64.779	1	47.6306	6.76092e-14	101.73	1	37.4914	1.1222e-06	76.31	0	0		#NUM!	1	14.4364	7.18102e-05	59.469
E9Q777	1163	E9Q777	E9Q777		Akap11	tr|E9Q777|E9Q777_MOUSE A kinase anchor protein 11 OS=Mus musculus OX=10090 GN=Akap11 PE=1 SV=2	0.945948	0.00688114	12.5944	9.56636e-09	95.835	81.888	95.835					0.799348	6.86077	0.00172651	46.839	0.945948	12.5944	9.56636e-09	95.835
E9Q784	242	E9Q784	E9Q784	Zinc finger CCCH domain-containing protein 13	Zc3h13	sp|E9Q784|ZC3HD_MOUSE Zinc finger CCCH domain-containing protein 13 OS=Mus musculus OX=10090 GN=Zc3h13 PE=1 SV=1	1	0	38.4116	2.01005e-13	132.44	101.25	101.39	1	53.816	2.86689e-05	106.19	1	14.5395	2.01005e-13	132.44	1	32.2013	2.76882e-08	121.82	1	44.2207	0.000144067	98.531	1	50.1303	3.07787e-05	109.22	1	14.5395	7.32943e-05	97.551	1	28.7334	0.000727948	86.467	1	52.2404	6.75264e-05	105	1	7.93531	0.00312479	78.486
E9Q784	198	E9Q784	E9Q784	Zinc finger CCCH domain-containing protein 13	Zc3h13	sp|E9Q784|ZC3HD_MOUSE Zinc finger CCCH domain-containing protein 13 OS=Mus musculus OX=10090 GN=Zc3h13 PE=1 SV=1	1	0	43.8583	2.19812e-77	215.23	173.94	54.066	1	52.2683	4.58107e-16	138.57	1	46.0223	0.000536115	96.331	1	57.1076	2.19812e-77	215.23	1	43.8583	0.000657609	75.215	1	57.4713	0.000287792	86.455	1	71.1336	2.02156e-48	189.81	1	37.7713	5.48382e-56	193.64	1	47.732	0.0017015	72.928	1	42.3125	0.000366314	84.581
E9Q784	1069	E9Q784	E9Q784	Zinc finger CCCH domain-containing protein 13	Zc3h13	sp|E9Q784|ZC3HD_MOUSE Zinc finger CCCH domain-containing protein 13 OS=Mus musculus OX=10090 GN=Zc3h13 PE=1 SV=1	0.994533	0.000617128	23.269	0.00131074	61.767	50.823	61.767					0.900255	10.6789	0.00189159	57.496	0.994533	23.269	0.00131074	61.767					0.884362	10.2198	0.0237471	42.309	0.93975	12.788	0.0057208	46.362
E9Q784	207	E9Q784	E9Q784	Zinc finger CCCH domain-containing protein 13	Zc3h13	sp|E9Q784|ZC3HD_MOUSE Zinc finger CCCH domain-containing protein 13 OS=Mus musculus OX=10090 GN=Zc3h13 PE=1 SV=1	0.99983	1.29114e-05	39.9309	2.35173e-06	129.77	96.499	93.649	0.996195	24.7716	0.000328127	98.253	0.999491	35.1191	0.000605102	92.495	0.99983	39.9309	0.000549581	93.649	0.999139	30.7526	0.000142671	103.11	0.99078	20.3429	5.80033e-05	108.58	0.996572	24.7435	0.000104133	105.6	0.999181	32.3087	7.95078e-06	113.53	0.998224	28.3525	0.000375275	97.273	0.99959	34.712	2.35173e-06	129.77
E9Q784	209	E9Q784	E9Q784	Zinc finger CCCH domain-containing protein 13	Zc3h13	sp|E9Q784|ZC3HD_MOUSE Zinc finger CCCH domain-containing protein 13 OS=Mus musculus OX=10090 GN=Zc3h13 PE=1 SV=1	0.997491	0.00026209	26.6912	2.35173e-06	129.77	96.499	116.96	0.98074	17.0797	0.000328127	98.253	0.990275	20.0888	0.000605102	92.495	0.996231	24.2429	0.000549581	93.649	0.996252	24.4195	0.000142671	103.11	0.997123	26.4678	5.80033e-05	108.58	0.984247	18	0.000104133	105.6	0.986223	18.5562	7.95078e-06	113.53	0.978351	16.5653	0.000375275	97.273	0.996596	24.7435	2.35173e-06	129.77
E9Q784	951	E9Q784	E9Q784	Zinc finger CCCH domain-containing protein 13	Zc3h13	sp|E9Q784|ZC3HD_MOUSE Zinc finger CCCH domain-containing protein 13 OS=Mus musculus OX=10090 GN=Zc3h13 PE=1 SV=1	0.999005	8.27089e-05	31.4326	0.000483774	85.837	54.01	85.837					0.971827	16.4893	0.0108681	64.394	0.999005	31.4326	0.000483774	85.837					0.846485	9.04199	0.0624469	43.184	0.983869	19.5782	0.00096814	81.431	0.93977	12.1312	0.00273396	76.262
E9Q784	953	E9Q784	E9Q784	Zinc finger CCCH domain-containing protein 13	Zc3h13	sp|E9Q784|ZC3HD_MOUSE Zinc finger CCCH domain-containing protein 13 OS=Mus musculus OX=10090 GN=Zc3h13 PE=1 SV=1	0.99994	4.60657e-06	44.4965	1.40384e-15	171.26	117.29	143.42	0.998617	30.6921	6.06724e-11	135.02	0.976137	16.6901	8.33538e-11	142.97	0.999794	37.7957	1.40384e-15	171.26	0.99994	44.4965	7.9617e-11	143.42	0.999814	38.0009	6.4162e-11	145.31	0.999839	38.8261	8.33315e-15	165.42	0.999657	34.9894	3.45974e-11	148.92	0.997523	26.8609	3.79332e-10	128.9	0.999893	41.8585	7.52564e-12	152.38
E9Q7D5	1109	E9Q7D5	E9Q7D5	Rho guanine nucleotide exchange factor 5	Arhgef5	sp|E9Q7D5|ARHG5_MOUSE Rho guanine nucleotide exchange factor 5 OS=Mus musculus OX=10090 GN=Arhgef5 PE=1 SV=1	0.701079	0.0546895	3.70211	5.81072e-15	138.21	109.89	138.21	0.499972	0	0.000135628	92.65	0.5	0	2.65115e-05	101.45	0.701079	3.70211	5.81072e-15	138.21	0.499998	0	6.68113e-07	111.78	0.499238	0	0.00205047	55.546	0.59941	2.28674	0.0015217	80.905	0.499998	0	1.7558e-05	104.7	0.499849	0	0.00252979	54.276
E9Q7D5	1110	E9Q7D5	E9Q7D5	Rho guanine nucleotide exchange factor 5	Arhgef5	sp|E9Q7D5|ARHG5_MOUSE Rho guanine nucleotide exchange factor 5 OS=Mus musculus OX=10090 GN=Arhgef5 PE=1 SV=1	0.65729	0.0672223	2.9735	6.68113e-07	111.78	85.286	46.892	0.499972	0	0.000135628	92.65	0.5	0	2.65115e-05	101.45	0.499984	0	4.25677e-05	92.773	0.499998	0	6.68113e-07	111.78	0.499238	0	0.00205047	55.546	0.499935	0	0.00335777	80.905	0.499998	0	1.7558e-05	104.7	0.499849	0	0.00252979	54.276
E9Q7D5	742	E9Q7D5	E9Q7D5	Rho guanine nucleotide exchange factor 5	Arhgef5	sp|E9Q7D5|ARHG5_MOUSE Rho guanine nucleotide exchange factor 5 OS=Mus musculus OX=10090 GN=Arhgef5 PE=1 SV=1	0.999061	7.80129e-05	30.3694	1.62946e-07	103.9	93.114	76.704					0.995104	24.9244	0.00088839	60.602	0.998079	28.4828	1.62946e-07	103.9	0.977318	17.0993	0.000481968	69.763					0.999061	30.3694	0.000307435	76.704	0.997912	28.647	7.28003e-05	89.011	0.994581	22.9379	0.000798133	62.002
E9Q7F2	679	E9Q7F2	E9Q7F2	E3 ubiquitin-protein ligase RNF169	Rnf169	sp|E9Q7F2|RN169_MOUSE E3 ubiquitin-protein ligase RNF169 OS=Mus musculus OX=10090 GN=Rnf169 PE=1 SV=1	0.965601	0.00429855	14.4825	0.00642746	51.092	28.175	45.79																													0.920183	10.6178	0.00642746	51.092
E9Q7F2	390	E9Q7F2	E9Q7F2	E3 ubiquitin-protein ligase RNF169	Rnf169	sp|E9Q7F2|RN169_MOUSE E3 ubiquitin-protein ligase RNF169 OS=Mus musculus OX=10090 GN=Rnf169 PE=1 SV=1	1	0	34.1024	0.000780792	102.07	53.894	58.433	1	34.1024	0.00580404	76.064	1	53.3167	0.000808986	93.178	1	67.0807	0.000822138	92.051	1	47.732	0.0145824	66.568	1	47.732	0.0019119	84.615	1	51.488	0.000780792	102.07	1	53.3167	0.00200864	83.998	1	35.6123	0.0149099	66.299	1	24.6739	0.106605	51.066
E9Q7G0	398	E9Q7G0	E9Q7G0	Nuclear mitotic apparatus protein 1	Numa1	sp|E9Q7G0|NUMA1_MOUSE Nuclear mitotic apparatus protein 1 OS=Mus musculus OX=10090 GN=Numa1 PE=1 SV=1	1	1.94013e-11	90.5093	7.069e-98	179.1	171.53	179.1	0.998886	29.5282	2.1047e-07	82.317	0.999971	45.4381	3.66014e-43	134.03	1	85.161	6.68048e-84	169.23	0.999999	62.4342	3.83782e-11	93.455	0.999993	51.7347	5.40014e-17	108.86	0.999535	33.3207	0.000110131	54.691	1	64.8797	1.98111e-55	142.91	0.999257	31.285	3.70734e-05	64.936	0.999742	35.8825	1.38143e-05	74.767
E9Q7G0	1951	E9Q7G0	E9Q7G0	Nuclear mitotic apparatus protein 1	Numa1	sp|E9Q7G0|NUMA1_MOUSE Nuclear mitotic apparatus protein 1 OS=Mus musculus OX=10090 GN=Numa1 PE=1 SV=1	0.999965	2.46298e-06	47.5202	2.42574e-09	108.57	102.59	79.172	0.999965	47.5202	2.42574e-09	108.57	0.999454	35.5306	3.4888e-05	81.329	0.990686	23.2782	5.47106e-05	79.445	0.999518	36.1809	1.25762e-07	100.62	0.934806	14.5754	0.00655816	61.222	0.99992	43.9608	5.85048e-05	78.202	0.99949	35.8999	3.59761e-05	80.683	0.999623	37.2414	3.16043e-05	82.177	0.999163	33.7776	5.6627e-06	90.193
E9Q7G0	2029	E9Q7G0	E9Q7G0	Nuclear mitotic apparatus protein 1	Numa1	sp|E9Q7G0|NUMA1_MOUSE Nuclear mitotic apparatus protein 1 OS=Mus musculus OX=10090 GN=Numa1 PE=1 SV=1	0.963971	0.00454641	15.2763	0.000313273	72.184	64.573	60.528	0.963971	14.6289	0.0012743	70.783	0.827054	8.18083	0.0351626	49.463	0.937971	12.9675	0.000313273	72.184	0.963971	15.2763	0.000825213	60.528
E9Q7G0	1739	E9Q7G0	E9Q7G0	Nuclear mitotic apparatus protein 1	Numa1	sp|E9Q7G0|NUMA1_MOUSE Nuclear mitotic apparatus protein 1 OS=Mus musculus OX=10090 GN=Numa1 PE=1 SV=1	0.834107	0.0255413	7.02205	8.35572e-43	140.16	116.74	139.38	0.813912	6.43714	2.42753e-10	110.26	0.826317	6.78503	8.35572e-43	132.01	0.834107	7.02205	4.13214e-26	139.38	0.817849	6.52581	1.38037e-09	103.27	0.785979	6.17265	3.61259e-17	113.53	0.679835	3.3311	2.02889e-21	113.33	0.833693	7.00135	6.41614e-27	118.52	0.708104	5.88832	3.15448e-13	112.56	0.772321	6.38921	1.50542e-18	122.22
E9Q7G0	1742	E9Q7G0	E9Q7G0	Nuclear mitotic apparatus protein 1	Numa1	sp|E9Q7G0|NUMA1_MOUSE Nuclear mitotic apparatus protein 1 OS=Mus musculus OX=10090 GN=Numa1 PE=1 SV=1	0.369891	0.186193	0.636559	1.03687e-16	75.99	70.676	75.99	0.369891	0.636559	1.03687e-16	75.99									0	0		#NUM!
E9Q8D0	283	E9Q8D0	E9Q8D0	DnaJ homolog subfamily C member 21	Dnajc21	sp|E9Q8D0|DJC21_MOUSE DnaJ homolog subfamily C member 21 OS=Mus musculus OX=10090 GN=Dnajc21 PE=1 SV=1	1	7.34902e-14	110.912	0	344.69	325.62	288.82	0.95813	13.5952	1.69982e-08	92.426	1	110.912	8.03441e-232	288.82	1	101.45	0	344.69	0.95648	13.4199	0.000110551	60.472	0.999905	40.2232	2.2238e-43	169.39	0.999991	50.5339	6.87325e-34	149.47	0.999995	52.6971	4.84347e-20	130.47	0.999848	38.1822	2.22552e-22	133.21	0.979164	16.7205	6.97128e-07	87.659
E9Q942	59	E9Q942	E9Q942	Small integral membrane protein 13	Smim13	sp|E9Q942|SIM13_MOUSE Small integral membrane protein 13 OS=Mus musculus OX=10090 GN=Smim13 PE=1 SV=1	0.736139	0.0469227	6.15284	8.51513e-06	65.244	59.7	65.244																					0.70671	3.94364	3.31206e-05	59.536	0.736139	6.15284	8.51513e-06	65.244
E9Q942	61	E9Q942	E9Q942	Small integral membrane protein 13	Smim13	sp|E9Q942|SIM13_MOUSE Small integral membrane protein 13 OS=Mus musculus OX=10090 GN=Smim13 PE=1 SV=1	0.736139	0.0468545	6.15284	8.51513e-06	65.244	59.7	65.244																					0.70671	3.94364	3.31206e-05	59.536	0.736139	6.15284	8.51513e-06	65.244
E9Q9Q2	1007	E9Q9Q2	E9Q9Q2		R3hdm1	tr|E9Q9Q2|E9Q9Q2_MOUSE R3H domain containing 1 OS=Mus musculus OX=10090 GN=R3hdm1 PE=1 SV=1	0.935426	0.00863275	11.6095	3.32648e-12	127.49	106.24	105.2	0.664086	2.95996	0.00019268	100.04	0.816589	6.48579	0.00203748	78.359	0.676681	3.20752	0.00227414	76.831	0.822362	6.65527	1.15947e-09	119.38	0.699982	3.6794	0.00125677	82.651	0.823554	6.69082	1.28538e-06	103.45	0.811356	6.33568	0.0034893	70.114	0.815035	6.44087	3.32648e-12	127.49	0.935426	11.6095	1.0149e-06	105.2
E9Q9Q2	381	E9Q9Q2	E9Q9Q2		R3hdm1	tr|E9Q9Q2|E9Q9Q2_MOUSE R3H domain containing 1 OS=Mus musculus OX=10090 GN=R3hdm1 PE=1 SV=1	0.998532	0.000128348	28.3839	9.10543e-05	96.059	81.852	96.059	0.992513	21.5069	0.000352845	84.365	0.992513	21.5069	0.00274654	70.622	0.993468	22.2425	9.10543e-05	91.093	0.972043	16.2338	0.00169707	75.462	0.915029	11.0804	0.00250486	71.558	0.984884	18.6027	0.000442185	82.069	0.998532	28.3839	0.000180861	96.059	0.997142	25.8844	0.000189924	88.552	0.940405	12.5997	0.00403517	66.004
E9Q9Q2	361	E9Q9Q2	E9Q9Q2		R3hdm1	tr|E9Q9Q2|E9Q9Q2_MOUSE R3H domain containing 1 OS=Mus musculus OX=10090 GN=R3hdm1 PE=1 SV=1	0.360545	0.19001	0	0.000256394	76.027	66.743	76.027					0.273134	0	0.00165357	52.541
E9Q9Q2	362	E9Q9Q2	E9Q9Q2		R3hdm1	tr|E9Q9Q2|E9Q9Q2_MOUSE R3H domain containing 1 OS=Mus musculus OX=10090 GN=R3hdm1 PE=1 SV=1	0.372885	0.185263	2.15279	0.000256394	76.027	66.743	57.826					0.273134	0	0.00165357	52.541																	0.372885	2.15279	0.00097312	57.826
E9QA16	400	E9QA16	E9QA16		Cald1	tr|E9QA16|E9QA16_MOUSE Caldesmon 1 OS=Mus musculus OX=10090 GN=Cald1 PE=1 SV=1	1	0	70.3446	4.51596e-06	116.71	92.37	98.156					1	53.3665	0.007791	81.676					1	63.5554	0.00102259	87.216									1	85.2937	4.51596e-06	116.71	1	36.9549	0.00376144	76.655	1	38.1606	0.0342379	58.274
E9QA16	387	E9QA16	E9QA16		Cald1	tr|E9QA16|E9QA16_MOUSE Caldesmon 1 OS=Mus musculus OX=10090 GN=Cald1 PE=1 SV=1	0.991843	0.000906752	20.8492	0.0006951	117.83	94.605	65.5					0.87608	8.49401	0.0161305	69.672	0.963339	14.1957	0.0269672	65.5	0	0		#NUM!	0.991843	20.8492	0.0269672	65.5	0.844198	7.33872	0.0348502	62.466	0.982367	17.4595	0.000988428	94.66	0.984758	18.103	0.0006951	117.83
E9QA16	496	E9QA16	E9QA16		Cald1	tr|E9QA16|E9QA16_MOUSE Caldesmon 1 OS=Mus musculus OX=10090 GN=Cald1 PE=1 SV=1	0.970592	0.00353621	17.1775	2.61299e-22	138.35	115.06	80.683	0.692574	4.2428	0.00407474	44.848	0.946044	14.9071	2.61299e-22	138.35	0.803138	8.57048	1.48591e-06	93.006					0.609127	2.31928	0.000247105	68.291	0.863911	9.53082	0.000174701	71.527	0.738982	5.40499	0.00033943	64.295	0	0		#NUM!
E9QA16	254	E9QA16	E9QA16		Cald1	tr|E9QA16|E9QA16_MOUSE Caldesmon 1 OS=Mus musculus OX=10090 GN=Cald1 PE=1 SV=1	0.990109	0.00113558	20.0046	1.07415e-07	141.13	106.44	136.38	0.82737	6.82239	2.66233e-05	106.49					0.958281	13.6145	3.85396e-05	113.53	0.84157	7.25277	1.07415e-07	122.78	0.912502	10.1889	2.39021e-05	107.09	0.921138	10.6879	0.000499439	101.97	0.990109	20.0046	8.64112e-07	136.38	0.835721	7.06738	0.000636273	82.85	0.845949	7.39997	1.13486e-06	141.13
E9QA16	129	E9QA16	E9QA16		Cald1	tr|E9QA16|E9QA16_MOUSE Caldesmon 1 OS=Mus musculus OX=10090 GN=Cald1 PE=1 SV=1	0.271413	0.225632	0	0.0040552	42.325	31.268	42.325																					0.271413	0	0.0040552	42.325
E9QA16	131	E9QA16	E9QA16		Cald1	tr|E9QA16|E9QA16_MOUSE Caldesmon 1 OS=Mus musculus OX=10090 GN=Cald1 PE=1 SV=1	0.271413	0.225729	0	0.0040552	42.325	31.268	42.325																					0.271413	0	0.0040552	42.325
E9QA16	532	E9QA16	E9QA16		Cald1	tr|E9QA16|E9QA16_MOUSE Caldesmon 1 OS=Mus musculus OX=10090 GN=Cald1 PE=1 SV=1	0.995874	0.000471636	23.8781	2.15373e-74	232.33	155.28	214.69	0.701712	3.71777	4.79652e-49	209.83	0.96165	13.9971	2.15373e-74	232.33	0.70321	3.74729	3.38067e-39	199.41	0.701798	3.71777	3.00562e-38	194.53	0.698633	3.65205	1.56941e-73	227.3	0.481792	1.19922	0.0103479	42.257	0.704303	3.7703	6.86313e-39	195.94	0.698322	3.64562	1.06664e-73	229.17	0.995874	23.8781	4.19308e-60	214.69
E9QAT4	1245	E9QAT4	E9QAT4	Protein transport protein Sec16A	Sec16a	sp|E9QAT4|SC16A_MOUSE Protein transport protein Sec16A OS=Mus musculus OX=10090 GN=Sec16a PE=1 SV=1	0.459715	0.148993	0.496144	0.00407663	77.593	65.638	77.593					0.459715	0.496144	0.00407663	77.593
E9QAT4	1342	E9QAT4	E9QAT4	Protein transport protein Sec16A	Sec16a	sp|E9QAT4|SC16A_MOUSE Protein transport protein Sec16A OS=Mus musculus OX=10090 GN=Sec16a PE=1 SV=1	0.994464	0.000623067	22.5626	3.81298e-67	164.43	153.82	145.63	0.963551	14.3191	1.287e-11	93.397	0.993424	21.7922	4.62979e-67	162.71	0.994464	22.5626	1.27202e-44	146.64	0.979448	16.8121	1.15793e-28	125.39	0.952546	13.0472	5.24381e-17	107.88	0.925493	10.9927	1.28417e-16	102.27	0.981597	17.3648	1.70265e-44	144.76	0.801906	6.97047	0.00122585	45.332	0.971191	15.3553	3.81298e-67	164.43
E9QAT4	2053	E9QAT4	E9QAT4	Protein transport protein Sec16A	Sec16a	sp|E9QAT4|SC16A_MOUSE Protein transport protein Sec16A OS=Mus musculus OX=10090 GN=Sec16a PE=1 SV=1	0.95752	0.00543425	13.5937	1.56477e-63	158.6	133.01	152.84	0.465424	0.864049	9.58519e-05	54.745	0.849477	7.54751	2.48707e-11	96.957	0.607339	1.96296	1.56477e-63	158.6					0.699262	3.67796	2.84815e-44	141.69	0.513772	0.258158	1.47023e-52	143.48	0.787368	6.1708	3.06299e-08	90.336	0.788572	5.99602	2.82372e-17	110.41
E9QAT4	2058	E9QAT4	E9QAT4	Protein transport protein Sec16A	Sec16a	sp|E9QAT4|SC16A_MOUSE Protein transport protein Sec16A OS=Mus musculus OX=10090 GN=Sec16a PE=1 SV=1	0.644892	0.0697303	2.68946	1.48903e-32	124.79	115.08	124.79					0.545276	2.20261	2.04335e-05	74.05	0.400937	0.497158	0.00126316	42.904	0.509834	0.176895	2.85007e-24	119.99
F2Z3U3	899	F2Z3U3	F2Z3U3		Raph1	tr|F2Z3U3|F2Z3U3_MOUSE Ras association (RalGDS/AF-6) and pleckstrin homology domains 1 OS=Mus musculus OX=10090 GN=Raph1 PE=1 SV=2	0.993867	0.000651254	22.1673	4.97008e-09	116.86	93.486	89.923					0.930623	12.0495	0.00208655	71.895	0.968637	15.0203	8.51181e-07	106.6					0.95028	12.9792	0.0062017	56.973	0.993867	22.1673	0.000400475	89.923	0.829668	7.60733	4.97008e-09	116.86	0.967118	15.0503	0.00804028	53.008	0.756239	5.70418	0.0117723	49.595
F2Z3U3	192	F2Z3U3	F2Z3U3		Raph1	tr|F2Z3U3|F2Z3U3_MOUSE Ras association (RalGDS/AF-6) and pleckstrin homology domains 1 OS=Mus musculus OX=10090 GN=Raph1 PE=1 SV=2	0.999319	5.36261e-05	34.7403	2.37349e-17	143.94	132.09	143.94	0.848828	9.8276	0.00372422	59.607	0.990915	22.1513	9.3819e-09	125.53	0.992967	21.7377	0.000144587	88.092	0.996523	24.7313	7.37519e-05	97.631	0.983791	17.8716	2.27127e-06	119.25	0.992357	21.3862	7.07549e-06	113.69	0.999319	34.7403	2.37349e-17	143.94	0.982474	17.7571	1.50865e-06	120.14
F6U5V1	266	F6U5V1	F6U5V1		Larp1b	tr|F6U5V1|F6U5V1_MOUSE La ribonucleoprotein 1B OS=Mus musculus OX=10090 GN=Larp1b PE=1 SV=2	0.900926	0.0144787	9.95895	2.44253e-05	66.137	51.827	66.137																	0.900926	9.95895	2.44253e-05	66.137													0.512581	3.18306	0.00315044	53.262
F8VPU2	427	F8VPU2	F8VPU2	FERM, ARHGEF and pleckstrin domain-containing protein 1	Farp1	sp|F8VPU2|FARP1_MOUSE FERM, ARHGEF and pleckstrin domain-containing protein 1 OS=Mus musculus OX=10090 GN=Farp1 PE=1 SV=1	1	1.89681e-15	127.094	6.61227e-79	220.43	175.82	194.38	0.999996	53.9048	2.12714e-09	112.67	1	116.42	4.4993e-49	185.63	1	105.324	2.96183e-50	192.21	1	127.094	4.56025e-57	194.38	1	83.9571	3.11454e-32	161.91	1	110.588	6.61227e-79	220.43	1	109.66	6.95937e-67	204.69	0.999996	54.349	3.75439e-17	138.91	0.999806	37.1229	7.5919e-05	89.483
F8VPU2	836	F8VPU2	F8VPU2	FERM, ARHGEF and pleckstrin domain-containing protein 1	Farp1	sp|F8VPU2|FARP1_MOUSE FERM, ARHGEF and pleckstrin domain-containing protein 1 OS=Mus musculus OX=10090 GN=Farp1 PE=1 SV=1	0.999745	2.03547e-05	37.1582	0.00248942	61.409	41.648	55.186	0.835733	10.0755	0.0131996	40.085					0.996685	27.5541	0.0366031	48.131	0.999745	37.1582	0.00897651	55.186					0.975143	18.6498	0.00248942	53.395	0	0		#NUM!	0.949516	15.2698	0.00957051	42.708	0.905395	12.8195	0.0131996	41.621
F8VPU2	336	F8VPU2	F8VPU2	FERM, ARHGEF and pleckstrin domain-containing protein 1	Farp1	sp|F8VPU2|FARP1_MOUSE FERM, ARHGEF and pleckstrin domain-containing protein 1 OS=Mus musculus OX=10090 GN=Farp1 PE=1 SV=1	0.993704	0.000678099	21.9818	0.000837662	112.95	84.772	112.95	0	0		#NUM!	0	0		#NUM!	0.909217	10.0802	0.0255247	66.056	0.993704	21.9818	0.000837662	112.95	0.835902	7.10311	0.00964161	73.781	0.842154	7.3498	0.0318416	63.624	0.892853	9.49148	0.0518456	56.548	0.822811	6.70816	0.0190252	68.557	0.989313	19.665	0.00145108	96.957
F8VPU2	370	F8VPU2	F8VPU2	FERM, ARHGEF and pleckstrin domain-containing protein 1	Farp1	sp|F8VPU2|FARP1_MOUSE FERM, ARHGEF and pleckstrin domain-containing protein 1 OS=Mus musculus OX=10090 GN=Farp1 PE=1 SV=1	0.328425	0.205062	0	1.18832e-08	95.205	88.33	72.158																	0.298749	0	0.000431339	51.971	0.322629	0	0.00243911	43.658	0.322992	0	1.18832e-08	95.205
F8VPU2	373	F8VPU2	F8VPU2	FERM, ARHGEF and pleckstrin domain-containing protein 1	Farp1	sp|F8VPU2|FARP1_MOUSE FERM, ARHGEF and pleckstrin domain-containing protein 1 OS=Mus musculus OX=10090 GN=Farp1 PE=1 SV=1	0.999813	1.43757e-05	37.2835	7.37483e-15	136.83	116.54	131.96	0.998534	28.34	1.89352e-06	97.797	0.999146	30.6833	3.6924e-14	131.96	0.998466	28.1355	2.93252e-12	130.2	0.999115	30.5282	7.37483e-15	136.83	0.993432	21.8098	0.000188967	92.65	0.999081	30.3635	4.62709e-12	129.17	0.994188	22.3319	1.11325e-11	125.22	0.999509	33.0884	2.48984e-12	130.47	0.999813	37.2835	3.6924e-14	131.96
F8VPU2	23	F8VPU2	F8VPU2	FERM, ARHGEF and pleckstrin domain-containing protein 1	Farp1	sp|F8VPU2|FARP1_MOUSE FERM, ARHGEF and pleckstrin domain-containing protein 1 OS=Mus musculus OX=10090 GN=Farp1 PE=1 SV=1	0.499931	0.124113	0	2.00014e-43	162.46	119.65	162.46	0.385424	0	1.30316e-05	75.717	0.405861	0	3.5671e-05	66.879	0	0		#NUM!					0.360939	0	0.00210974	40.682									0.470159	0	2.00014e-43	140.71	0.442531	0	2.25655e-05	71.472
F8VPU2	892	F8VPU2	F8VPU2	FERM, ARHGEF and pleckstrin domain-containing protein 1	Farp1	sp|F8VPU2|FARP1_MOUSE FERM, ARHGEF and pleckstrin domain-containing protein 1 OS=Mus musculus OX=10090 GN=Farp1 PE=1 SV=1	0.999535	3.89899e-05	34.0357	1.44626e-91	209.25	197.6	209.25	0.969411	15.8819	1.6123e-20	130.73					0.999535	34.0357	1.44626e-91	209.25	0.977153	17.1089	4.96171e-43	173.49					0.873983	10.6871	5.55956e-05	64.256	0.865961	12.2419	0.000216658	71.54
F8VPU2	902	F8VPU2	F8VPU2	FERM, ARHGEF and pleckstrin domain-containing protein 1	Farp1	sp|F8VPU2|FARP1_MOUSE FERM, ARHGEF and pleckstrin domain-containing protein 1 OS=Mus musculus OX=10090 GN=Farp1 PE=1 SV=1	0.297489	0.217362	0	0.00255187	67.076	52.767	67.076
F8VPZ9	1427	F8VPZ9	F8VPZ9	BRD4-interacting chromatin-remodeling complex-associated protein	Bicra	sp|F8VPZ9|BICRA_MOUSE BRD4-interacting chromatin-remodeling complex-associated protein OS=Mus musculus OX=10090 GN=Bicra PE=1 SV=1	0.97828	0.00249976	16.596	1.26799e-13	107.88	98.713	107.88	0.664996	5.15251	0.000253707	54.259	0.639704	4.9606	1.32895e-05	69.619	0.97828	16.596	1.26799e-13	107.88	0.513495	2.88702	4.33896e-05	64.028	0.749816	5.61575	2.1312e-06	76.691	0.973893	15.8351	2.13053e-13	105.24	0.831391	8.32159	1.13422e-05	69.981	0.90762	10.5923	4.76422e-08	89.511	0.772335	6.25508	2.1312e-06	76.691
F8VQ05	1958	F8VQ05	F8VQ05		Fryl	tr|F8VQ05|F8VQ05_MOUSE FRY like transcription coactivator OS=Mus musculus OX=10090 GN=Fryl PE=1 SV=1	0.929738	0.00954362	11.8714	0.000812994	96.059	65.187	96.059	0.757056	5.2755	0.0036573	53.169	0.711342	4.61628	0.00407324	51.147	0.717744	5.0645	0.00180678	63.134	0.929738	11.8714	0.000812994	96.059	0.617574	2.58909	0.0223472	43.024	0.88854	9.03717	0.00087723	84.718	0.475306	0	0.0150825	68.44
F8VQ05	1979	F8VQ05	F8VQ05		Fryl	tr|F8VQ05|F8VQ05_MOUSE FRY like transcription coactivator OS=Mus musculus OX=10090 GN=Fryl PE=1 SV=1	0.995921	0.000464793	26.9349	0.00185802	129	72.085	95.618	0.788484	6.89287	0.00659499	81.017	0.968151	15.548	0.0028892	104.43	0.995579	25.3919	0.0027305	129	0.691402	3.61134	0.0023894	90.653	0.916701	13.3969	0.0345942	67.08	0.890082	11.2015	0.00339943	88.056	0.994923	24.6995	0.00445293	108.31	0.826503	7.2063	0.00688186	80.834	0.795197	6.33858	0.0268361	69.65
F8VQB6	1887	F8VQB6	F8VQB6	Unconventional myosin-X	Myo10	sp|F8VQB6|MYO10_MOUSE Unconventional myosin-X OS=Mus musculus OX=10090 GN=Myo10 PE=1 SV=1	0.794007	0.0348863	5.87523	3.73367e-05	99.481	82.079	99.481	0.731743	4.58963	0.00476113	55.885	0.789122	5.76101	0.00113774	70.26	0.734254	4.77529	0.00191875	66.285	0.794007	5.87523	3.73367e-05	99.481									0.77063	5.31671	0.00223517	64.675	0.609694	2.33659	0.00720922	50.155
F8VQC1	620	F8VQC1	F8VQC1	Signal recognition particle subunit SRP72	Srp72	tr|F8VQC1|F8VQC1_MOUSE Signal recognition particle subunit SRP72 OS=Mus musculus OX=10090 GN=Srp72 PE=1 SV=1	0.512542	0.113469	1.68564	6.33636e-11	95.042	88.09	95.042	0.281042	0.342469	0.0127747	42.302	0.512542	1.68564	6.33636e-11	95.042					0.346554	1.36177	0.0011702	47.919					0.147726	0	0.00855612	44.811
F8VQC1	621	F8VQC1	F8VQC1	Signal recognition particle subunit SRP72	Srp72	tr|F8VQC1|F8VQC1_MOUSE Signal recognition particle subunit SRP72 OS=Mus musculus OX=10090 GN=Srp72 PE=1 SV=1	0.832442	0.0260904	7.46795	2.79132e-43	136.33	129.35	126.34	0.660723	3.21989	7.91966e-17	107.29	0.684606	3.67244	2.79132e-43	136.33	0.602278	2.95104	4.91117e-24	118.05	0.79363	6.12273	5.33929e-25	121.45	0.70054	3.91337	6.54708e-24	119.36	0.832442	7.46795	6.64915e-33	128.6	0.805454	6.34729	3.07275e-43	135.17	0.717622	4.12791	2.03321e-23	115.74	0.770762	7.57994	8.48798e-33	127.14
F8VQC1	625	F8VQC1	F8VQC1	Signal recognition particle subunit SRP72	Srp72	tr|F8VQC1|F8VQC1_MOUSE Signal recognition particle subunit SRP72 OS=Mus musculus OX=10090 GN=Srp72 PE=1 SV=1	0.738592	0.0461061	5.0345	2.79132e-43	136.33	129.35	110.59	0.341117	0	4.91608e-07	82.765	0.57895	1.64183	2.79132e-43	136.33	0.443383	0	4.03465e-16	102.27	0.306263	0	0.000288343	52.329	0.612715	2.82369	6.54708e-24	119.36	0.558335	1.7482	6.64915e-33	128.6	0.572906	1.7482	3.07275e-43	135.17					0.583733	1.76659	1.51238e-32	123.53
F8VQC1	630	F8VQC1	F8VQC1	Signal recognition particle subunit SRP72	Srp72	tr|F8VQC1|F8VQC1_MOUSE Signal recognition particle subunit SRP72 OS=Mus musculus OX=10090 GN=Srp72 PE=1 SV=1	0.281252	0.222439	0	0.000104829	56.947	43.79	46.956	0.249046	0.523206	0.0156016	40.428	0.281252	0	0.000104829	56.468
G3X9A3	439	G3X9A3	G3X9A3		Zbtb21	tr|G3X9A3|G3X9A3_MOUSE Zinc finger and BTB domain containing 21 OS=Mus musculus OX=10090 GN=Zbtb21 PE=1 SV=1	0.809112	0.0310126	9.4178	3.05699e-11	105.51	87.19	105.51													0.809112	9.4178	3.05699e-11	105.51	0.509987	4.51057	5.13509e-06	78.272													0.669015	4.2025	0.000232593	57.238
G3X9J0	1358	G3X9J0	G3X9J0	Signal-induced proliferation-associated 1-like protein 3	Sipa1l3	sp|G3X9J0|SI1L3_MOUSE Signal-induced proliferation-associated 1-like protein 3 OS=Mus musculus OX=10090 GN=Sipa1l3 PE=1 SV=1	1	0	68.5634	0.00091594	92.112	74.292	92.112	1	19.626	0.0636449	44.309	1	42.3125	0.00514186	56.916					1	67.0807	0.00091594	75.479
G3X9J0	1538	G3X9J0	G3X9J0	Signal-induced proliferation-associated 1-like protein 3	Sipa1l3	sp|G3X9J0|SI1L3_MOUSE Signal-induced proliferation-associated 1-like protein 3 OS=Mus musculus OX=10090 GN=Sipa1l3 PE=1 SV=1	0.996226	0.000409717	27.4907	6.58715e-05	92.19	76.528	92.19					0.971274	17.9365	0.00507925	66.393	0.995488	26.0481	6.58715e-05	91.858					0.859048	9.85053	0.0999264	43.297	0.94813	14.6546	0.00876944	60.157	0.874053	11.1128	0.0211352	49.35
G3XA57	277	G3XA57	G3XA57	Rab11 family-interacting protein 2	Rab11fip2	sp|G3XA57|RFIP2_MOUSE Rab11 family-interacting protein 2 OS=Mus musculus OX=10090 GN=Rab11fip2 PE=1 SV=1	0.983342	0.00198982	18.3007	1.36247e-62	159.1	145.36	117.88	0.983342	18.3007	5.59735e-24	117.88									0.960516	14.1889	1.38281e-42	132.57	0.885532	8.93912	4.66295e-43	138.88	0.895896	9.99582	1.24889e-24	120.98	0.907756	13.239	1.44188e-33	131.23	0.922834	10.9373	8.67428e-33	127.44	0.850052	9.21399	4.7595e-11	92.231
G5E829	1139	G5E829	G5E829	Plasma membrane calcium-transporting ATPase 1	Atp2b1	sp|G5E829|AT2B1_MOUSE Plasma membrane calcium-transporting ATPase 1 OS=Mus musculus OX=10090 GN=Atp2b1 PE=1 SV=1	0.499937	0.123836	0	0.000304664	75.018	54.893	72.433	0.4736	0	0.00501831	47.666	0.499937	0	0.000382799	72.433					0.499712	0	0.00141567	58.21	0.455707	0	0.00046495	70.332	0.499917	0	0.000600568	67.605	0.497566	0	0.00064693	66.673	0.462551	0	0.00501831	47.666	0.478993	0	0.00968482	41.092
G5E829	1140	G5E829	G5E829	Plasma membrane calcium-transporting ATPase 1	Atp2b1	sp|G5E829|AT2B1_MOUSE Plasma membrane calcium-transporting ATPase 1 OS=Mus musculus OX=10090 GN=Atp2b1 PE=1 SV=1	0.499937	0.123928	0	0.000304664	75.018	54.893	72.433	0.4736	0	0.00501831	47.666	0.499937	0	0.000382799	72.433					0.499712	0	0.00141567	58.21	0.455707	0	0.00046495	70.332	0.499917	0	0.000600568	67.605	0.497566	0	0.00064693	66.673	0.462551	0	0.00501831	47.666	0.478993	0	0.00968482	41.092
G5E829	1155	G5E829	G5E829	Plasma membrane calcium-transporting ATPase 1	Atp2b1	sp|G5E829|AT2B1_MOUSE Plasma membrane calcium-transporting ATPase 1 OS=Mus musculus OX=10090 GN=Atp2b1 PE=1 SV=1	0.447086	0.154292	4.57559	2.82389e-06	59.187	57.263	59.187	0.447086	4.57559	2.82389e-06	59.187
G5E870	1460	G5E870	G5E870	E3 ubiquitin-protein ligase TRIP12	Trip12	sp|G5E870|TRIPC_MOUSE E3 ubiquitin-protein ligase TRIP12 OS=Mus musculus OX=10090 GN=Trip12 PE=1 SV=1	0.451069	0.153122	0	0.000559395	97.463	75.503	97.463	0.328596	0	0.00970891	75.819	0	0		#NUM!	0.451069	0	0.000559395	97.463	0.449306	0	0.00681864	78.324									0	0		#NUM!	0.31212	0	0.0697165	57.019
G5E870	312	G5E870	G5E870	E3 ubiquitin-protein ligase TRIP12	Trip12	sp|G5E870|TRIPC_MOUSE E3 ubiquitin-protein ligase TRIP12 OS=Mus musculus OX=10090 GN=Trip12 PE=1 SV=1	0.952194	0.0060765	12.9997	0.000282157	73.466	57.952	71.531	0.772203	5.71008	0.0266938	42.785	0.937246	12.9517	0.00044978	68.413	0.790409	7.04147	0.00651627	43.297	0.899414	9.52547	0.000402621	69.594	0.952194	12.9997	0.000329098	71.531	0.833342	7.02227	0.00166932	54.237	0.884824	8.94522	0.00146569	55.755	0.922572	11.7036	0.001542	55.186	0.943298	12.5519	0.000940002	59.673
G5E8K5	1451	G5E8K5	G5E8K5	Ankyrin-3	Ank3	sp|G5E8K5|ANK3_MOUSE Ankyrin-3 OS=Mus musculus OX=10090 GN=Ank3 PE=1 SV=1	0.999644	2.77762e-05	34.4827	1.27585e-06	131.36	73.522	131.36	0.998522	28.2967	0.000567646	89.747	0.997936	26.8441	1.67695e-06	125.82	0.99678	24.9079	0.00106019	84.954	0.999644	34.4827	1.27585e-06	131.36	0.994175	22.3215	0.0181776	62.454	0.982003	17.3691	0.003358	75.736	0.997462	25.9446	0.000330148	93.468	0.980073	16.9183	0.00271376	60.345	0.992651	21.3058	0.0103579	46.744
G5E8P1	128	G5E8P1	G5E8P1	Bromodomain-containing protein 1	Brd1	sp|G5E8P1|BRD1_MOUSE Bromodomain-containing protein 1 OS=Mus musculus OX=10090 GN=Brd1 PE=1 SV=1	0.873068	0.0183514	10.0597	3.33104e-09	130.01	68.652	98.105					0.851776	8.24407	3.33104e-09	130.01	0.843746	8.00997	8.17794e-05	95.417	0	0		#NUM!					0.792741	7.89469	8.01661e-06	113.65	0.873068	10.0597	0.000420629	98.105	0.747752	6.50188	0.000853717	79.82	0.783919	7.66698	0.000531114	105.17
G5E8V9	39	G5E8V9	G5E8V9	Arfaptin-1	Arfip1	sp|G5E8V9|ARFP1_MOUSE Arfaptin-1 OS=Mus musculus OX=10090 GN=Arfip1 PE=1 SV=1	0.528195	0.107666	2.96049	0.000906369	56.247	44.167	56.247	0.528195	2.96049	0.000906369	56.247
G5E8V9	132	G5E8V9	G5E8V9	Arfaptin-1	Arfip1	sp|G5E8V9|ARFP1_MOUSE Arfaptin-1 OS=Mus musculus OX=10090 GN=Arfip1 PE=1 SV=1	0.958493	0.00533377	13.8342	0.00905353	78.098	12.793	57.203	0	0		#NUM!	0.958493	13.8342	0.0525136	57.203									0	0		#NUM!	0.90451	10.3252	0.0144143	73.887	0.953046	14.1238	0.0264754	67.704	0	0		#NUM!
J3QN14	390	J3QN14	J3QN14		Zfp616	tr|J3QN14|J3QN14_MOUSE Zinc finger protein 616 OS=Mus musculus OX=10090 GN=Zfp616 PE=4 SV=1	0.71338	0.0516789	1.72877	0.00206517	41.912	21.486	41.912
J3QN14	393	J3QN14	J3QN14		Zfp616	tr|J3QN14|J3QN14_MOUSE Zinc finger protein 616 OS=Mus musculus OX=10090 GN=Zfp616 PE=4 SV=1	0.71338	0.0517511	1.72877	0.00206517	41.912	21.486	41.912
O08539	286	O08539	O08539	Myc box-dependent-interacting protein 1	Bin1	sp|O08539|BIN1_MOUSE Myc box-dependent-interacting protein 1 OS=Mus musculus OX=10090 GN=Bin1 PE=1 SV=1	0.530731	0.106362	0	1.96986e-06	59.954	54.051	43.31																	0.47045	0.979102	0.000107113	58.08					0.236652	0	3.52632e-05	57.299	0.257362	0	0.000827465	43.291
O08539	296	O08539	O08539	Myc box-dependent-interacting protein 1	Bin1	sp|O08539|BIN1_MOUSE Myc box-dependent-interacting protein 1 OS=Mus musculus OX=10090 GN=Bin1 PE=1 SV=1	0.641692	0.0707146	1.49622	7.31536e-07	77.598	75.514	50.705									0.380003	0	1.70015e-06	68.907	0.641692	1.49622	1.68959e-05	64.315	0.47045	0.979102	0.000107113	58.08	0.283126	0	3.91507e-06	65.736	0.299965	0	1.49983e-05	65.377	0.257362	0	0.000827465	43.291	0.277328	0	0.000668084	45.125
O08539	298	O08539	O08539	Myc box-dependent-interacting protein 1	Bin1	sp|O08539|BIN1_MOUSE Myc box-dependent-interacting protein 1 OS=Mus musculus OX=10090 GN=Bin1 PE=1 SV=1	0.649734	0.0686716	5.68624	7.2426e-12	94.263	85.989	83.59	0.41028	1.40519	9.71781e-06	68.333	0.649734	5.68624	5.82811e-09	90.303	0.63512	5.22927	1.70015e-06	77.433	0.641692	1.49622	1.68959e-05	64.315	0.456842	1.98193	3.74367e-07	79.829	0.283126	0	3.91507e-06	65.736	0.299965	0	1.49983e-05	65.377	0.27917	0.78164	0.000827465	43.291	0.430958	4.2447	3.81751e-05	59.954
O08539	304	O08539	O08539	Myc box-dependent-interacting protein 1	Bin1	sp|O08539|BIN1_MOUSE Myc box-dependent-interacting protein 1 OS=Mus musculus OX=10090 GN=Bin1 PE=1 SV=1	0.875705	0.0179469	9.41752	0.00278165	68.481	50.672	51.606					0.712369	7.40295	0.017873	50.053	0.875705	9.41752	0.0153409	51.606
O08539	332	O08539	O08539	Myc box-dependent-interacting protein 1	Bin1	sp|O08539|BIN1_MOUSE Myc box-dependent-interacting protein 1 OS=Mus musculus OX=10090 GN=Bin1 PE=1 SV=1	0.527987	0.107759	3.75588	0.0010994	61.112	49.324	61.112													0.527987	3.75588	0.0010994	61.112
O08547	137	O08547	O08547	Vesicle-trafficking protein SEC22b	Sec22b	sp|O08547|SC22B_MOUSE Vesicle-trafficking protein SEC22b OS=Mus musculus OX=10090 GN=Sec22b PE=1 SV=3	1	3.73781e-11	88.0613	9.8965e-133	260.97	232.24	243.92	0.99995	42.9671	6.31054e-23	143.99	1	88.0613	1.26235e-113	243.92	0.999354	31.8925	5.41854e-31	155.92	1	72.8483	2.7381e-132	256.52	1	80.7751	5.08164e-69	218.68	0.999998	58.0131	1.60499e-70	222.88	0.999998	57.9977	1.22111e-113	244.23	1	76.9213	3.1531e-57	205.3	1	73.4251	9.8965e-133	260.97
O08553	518	O08553	O08553	Dihydropyrimidinase-related protein 2	Dpysl2	sp|O08553|DPYL2_MOUSE Dihydropyrimidinase-related protein 2 OS=Mus musculus OX=10090 GN=Dpysl2 PE=1 SV=2	0.347322	0.19359	0	4.29244e-05	73.918	60.866	73.918																									0.347322	0	4.29244e-05	73.918
O08553	522	O08553	O08553	Dihydropyrimidinase-related protein 2	Dpysl2	sp|O08553|DPYL2_MOUSE Dihydropyrimidinase-related protein 2 OS=Mus musculus OX=10090 GN=Dpysl2 PE=1 SV=2	0.893718	0.0156022	9.86716	6.79689e-39	145.25	111.91	99.441	0.649014	2.82625	9.69803e-18	115.5					0.893718	9.86716	2.86878e-08	99.441	0.647316	2.76498	1.51788e-09	92.565	0.657425	5.48853	0.0082174	52.91	0.488948	1.0441	6.79689e-39	145.25					0.342699	0	0.00457822	44.683	0.58077	3.76071	0.000109515	59.557
O08582	44	O08582	O08582	GTP-binding protein 1	Gtpbp1	sp|O08582|GTPB1_MOUSE GTP-binding protein 1 OS=Mus musculus OX=10090 GN=Gtpbp1 PE=1 SV=2	0.882301	0.0169209	13.1061	0.000104569	54.703	50.781	54.703									0.593157	3.75419	0.00057008	47.006									0.882301	13.1061	0.000104569	54.703	0.67513	6.23894	0.000682242	45.957
O08582	47	O08582	O08582	GTP-binding protein 1	Gtpbp1	sp|O08582|GTPB1_MOUSE GTP-binding protein 1 OS=Mus musculus OX=10090 GN=Gtpbp1 PE=1 SV=2	0.880783	0.0171144	13.0202	0.000104569	54.703	50.781	54.703									0.593157	3.75419	0.00057008	47.006									0.880783	13.0202	0.000104569	54.703	0.673487	6.19407	0.000682242	45.957
O08582	6	O08582	O08582	GTP-binding protein 1	Gtpbp1	sp|O08582|GTPB1_MOUSE GTP-binding protein 1 OS=Mus musculus OX=10090 GN=Gtpbp1 PE=1 SV=2	0.656412	0.0673023	3.40501	4.68415e-33	129.53	112.16	80.816	0.650543	3.58384	1.31453e-05	78.04	0.656412	3.40501	9.57013e-24	115.78	0.46223	0	1.94815e-32	122.88	0.476305	0	2.85624e-11	95.111	0.598504	2.20844	8.86756e-24	115.55	0.562873	1.6998	2.02801e-24	120.42	0.503079	1.30191	9.53948e-10	91.485	0.510746	1.38924	2.2454e-08	88.616	0.432515	1.29906	3.03304e-16	103.03
O08582	8	O08582	O08582	GTP-binding protein 1	Gtpbp1	sp|O08582|GTPB1_MOUSE GTP-binding protein 1 OS=Mus musculus OX=10090 GN=Gtpbp1 PE=1 SV=2	0.918884	0.0112223	10.6046	3.45074e-84	206.95	184.31	206.95	0.894121	9.49364	2.16477e-51	150.62	0.918884	10.6046	3.45074e-84	206.95	0.65664	3.84083	1.94815e-32	122.88	0.476304	0	2.85624e-11	95.111	0.632443	3.43425	1.53811e-16	104.78	0.577874	2.75577	1.14207e-23	111.52	0.669851	3.49823	5.38543e-27	120.91	0.561965	1.62094	2.14129e-32	121.98	0.453856	1.30281	1.72252e-16	103.94
O08582	24	O08582	O08582	GTP-binding protein 1	Gtpbp1	sp|O08582|GTPB1_MOUSE GTP-binding protein 1 OS=Mus musculus OX=10090 GN=Gtpbp1 PE=1 SV=2	0.727103	0.0491312	4.27566	3.45074e-84	206.95	184.31	206.95	0.602112	1.84337	1.31453e-05	78.04	0.727103	4.27566	3.45074e-84	206.95	0.49771	0	0.000129785	55.119					0.532421	0.586576	2.86928e-07	85.19	0.567885	1.29901	2.89093e-05	73.868	0.532553	0.582154	9.53948e-10	91.485	0.451068	0	0.000167947	52.237	0	0		#NUM!
O08582	25	O08582	O08582	GTP-binding protein 1	Gtpbp1	sp|O08582|GTPB1_MOUSE GTP-binding protein 1 OS=Mus musculus OX=10090 GN=Gtpbp1 PE=1 SV=2	0.887757	0.0163976	8.97306	2.16477e-51	150.62	117.92	115.78	0.806687	6.22447	2.16477e-51	150.62	0.887757	8.97306	9.57013e-24	115.78	0.728569	4.32808	1.94815e-32	122.88	0.85357	7.81069	2.85624e-11	95.111	0.808173	6.25356	1.53811e-16	104.78	0.877599	8.57022	1.14207e-23	111.52	0.723352	4.18697	5.38543e-27	120.91	0.721351	4.14278	2.14129e-32	121.98	0.857773	7.86178	1.72252e-16	103.94
O08648	1259	O08648	O08648	Mitogen-activated protein kinase kinase kinase 4	Map3k4	sp|O08648|M3K4_MOUSE Mitogen-activated protein kinase kinase kinase 4 OS=Mus musculus OX=10090 GN=Map3k4 PE=1 SV=2	0.322907	0.207787	0	0.000216838	86.548	71.458	86.548	0.298534	0	0.000355677	82.259																									0.322907	0	0.000216838	86.548
O08648	1263	O08648	O08648	Mitogen-activated protein kinase kinase kinase 4	Map3k4	sp|O08648|M3K4_MOUSE Mitogen-activated protein kinase kinase kinase 4 OS=Mus musculus OX=10090 GN=Map3k4 PE=1 SV=2	0.924624	0.0103292	14.0398	3.9993e-06	107.82	95.076	95.9	0.298534	0	0.000355677	82.259	0.60866	6.39724	0.00118956	63.46	0.924624	14.0398	3.56179e-05	95.9	0.45771	2.38849	2.40017e-05	98.408	0.718925	7.6739	0.000307154	83.758	0.79296	10.2008	0.00107623	65.105					0.322907	0	0.000216838	86.548	0.5045	3.76757	0.00101306	66.022
O08715	55	O08715	O08715	A-kinase anchor protein 1, mitochondrial	Akap1	sp|O08715|AKAP1_MOUSE A-kinase anchor protein 1, mitochondrial OS=Mus musculus OX=10090 GN=Akap1 PE=1 SV=4	0.999986	9.52382e-07	48.9003	1.56303e-52	146.5	140.54	115.93	0.959179	16.5393	1.53179e-06	80.847	0.997393	27.4713	3.68372e-43	136.79	0.999986	48.9003	8.96702e-24	115.93	0.998362	30.8518	2.13517e-13	101.59	0.998711	31.5817	2.02248e-11	97.804	0.999949	43.0841	4.40891e-43	135.75	0.999484	35.1385	1.28403e-16	105.61	0.998207	29.4321	1.56303e-52	146.5	0.999245	32.7752	8.42041e-08	88.242
O08715	101	O08715	O08715	A-kinase anchor protein 1, mitochondrial	Akap1	sp|O08715|AKAP1_MOUSE A-kinase anchor protein 1, mitochondrial OS=Mus musculus OX=10090 GN=Akap1 PE=1 SV=4	0.995263	0.000516107	23.6215	2.22558e-23	143.4	121.8	125.57	0.853457	10.6629	0.000522364	73.405	0.995263	23.6215	8.84097e-13	125.57	0.994996	23.801	8.97954e-14	131.33	0.991499	21.5989	4.85572e-12	129.05	0.977533	17.211	5.75886e-10	115.2	0.975816	16.3437	5.31877e-13	128.12	0.97266	17.1499	2.22558e-23	143.4	0.986964	19.2284	5.62393e-13	127.9	0.452832	1.18581	7.08874e-05	90.22
O08784	592	O08784	O08784	Treacle protein	Tcof1	sp|O08784|TCOF_MOUSE Treacle protein OS=Mus musculus OX=10090 GN=Tcof1 PE=1 SV=1	0.485957	0.137161	0	0.000130711	83.37	71.756	83.37
O08784	593	O08784	O08784	Treacle protein	Tcof1	sp|O08784|TCOF_MOUSE Treacle protein OS=Mus musculus OX=10090 GN=Tcof1 PE=1 SV=1	0.849497	0.0224108	7.54893	8.30198e-31	170.77	152.38	170.77																	0.842538	7.35458	1.14379e-26	137.61	0.849497	7.54893	8.30198e-31	170.77	0.838331	7.21513	6.62233e-16	125.39
O08784	1216	O08784	O08784	Treacle protein	Tcof1	sp|O08784|TCOF_MOUSE Treacle protein OS=Mus musculus OX=10090 GN=Tcof1 PE=1 SV=1	1	3.50351e-11	88.1347	1.26772e-113	249.54	216.31	249.54					0.999662	37.3347	1.46015e-14	143.93	1	88.1347	1.26772e-113	249.54	0.999999	62.9441	3.05461e-39	189.04	0.999995	52.9256	6.64992e-33	178.47	0.999926	41.2852	7.96285e-29	171.15	0.999986	48.4345	1.48888e-20	151.18	0.992476	22.689	0.016737	54.967
O08784	1224	O08784	O08784	Treacle protein	Tcof1	sp|O08784|TCOF_MOUSE Treacle protein OS=Mus musculus OX=10090 GN=Tcof1 PE=1 SV=1	0.997184	0.000303265	29.4074	0.0134274	58.268	40.311	50.102	0.990486	23.669	0.0564419	43.548	0	0		#NUM!	0.997184	29.4074	0.107774	50.102	0.991571	23.7956	0.0611554	42.52	0	0		#NUM!	0.989257	22.3352	0.0263763	50.102	0.982354	21.4865	0.0136616	58.071	0.932778	14.6262	0.0683975	40.941
O08784	1191	O08784	O08784	Treacle protein	Tcof1	sp|O08784|TCOF_MOUSE Treacle protein OS=Mus musculus OX=10090 GN=Tcof1 PE=1 SV=1	1	0	27.0497	1.88289e-49	210.2	163.22	49.265	1	168.567	4.74494e-25	177.76	1	156.291	4.77335e-21	171.15	1	152.502	5.51382e-21	170.95	1	169.666	4.4432e-31	183.58	1	186.129	1.75936e-31	189.07	1	210.202	1.88289e-49	210.2	1	178.555	1.67736e-39	199.04	1	24.3628	1.15503e-16	149.14	1	14.6107	9.89343e-18	158.29
O08784	169	O08784	O08784	Treacle protein	Tcof1	sp|O08784|TCOF_MOUSE Treacle protein OS=Mus musculus OX=10090 GN=Tcof1 PE=1 SV=1	0.999749	2.01538e-05	36.9524	3.28309e-179	232.55	214.63	125.47	0.980354	18.8291	2.32746e-56	149.55	0.996837	25.8802	3.83051e-98	177.93	0.999749	36.9524	1.35856e-114	191.82	0.942299	11.964	3.31258e-165	219.76	0.969332	16.0725	2.22931e-56	149.67	0.985365	19.0023	3.28309e-179	232.55	0.99563	24.6896	6.17704e-165	216.94	0.956476	14.5607	3.37711e-56	148.36	0.999153	31.2506	3.28715e-44	140.34
O08784	1124	O08784	O08784	Treacle protein	Tcof1	sp|O08784|TCOF_MOUSE Treacle protein OS=Mus musculus OX=10090 GN=Tcof1 PE=1 SV=1	0.306785	0.213079	0	1.96762e-13	116.06	91.34	116.06	0.302961	0	3.9383e-05	83.253					0.212168	0	5.01736e-07	92.264					0.2403	0	0.0150607	49.708									0.293309	0	4.30041e-05	82.482	0.210481	0	0.000312116	75.462
O08784	1126	O08784	O08784	Treacle protein	Tcof1	sp|O08784|TCOF_MOUSE Treacle protein OS=Mus musculus OX=10090 GN=Tcof1 PE=1 SV=1	0.604561	0.0805666	6.01205	1.96762e-13	116.06	91.34	111.33	0.302961	0	3.9383e-05	83.253	0.180176	0	0.000530082	55.228	0.594191	6.91121	5.01736e-07	92.264					0.492522	4.48799	2.33972e-13	114.96	0.518258	4.80598	1.28097e-09	103.88	0.604561	6.01205	6.93566e-11	111.33	0.293309	0	4.30041e-05	82.482	0.407601	3.19051	0.000312116	75.462
O08784	1127	O08784	O08784	Treacle protein	Tcof1	sp|O08784|TCOF_MOUSE Treacle protein OS=Mus musculus OX=10090 GN=Tcof1 PE=1 SV=1	0.389578	0.178788	0	3.24439e-19	129.88	112.39	129.88	0.170833	0	0.00032431	51.398	0.180176	0	0.000530082	55.228													0.17069	0	4.46204e-05	64.256
O08784	1128	O08784	O08784	Treacle protein	Tcof1	sp|O08784|TCOF_MOUSE Treacle protein OS=Mus musculus OX=10090 GN=Tcof1 PE=1 SV=1	0.389578	0.178695	0	3.24439e-19	129.88	112.39	129.88	0.170833	0	0.00032431	51.398	0.180176	0	0.000530082	55.228									0.316621	2.2625	0.00066124	48.053	0.17069	0	4.46204e-05	64.256
O08784	852	O08784	O08784	Treacle protein	Tcof1	sp|O08784|TCOF_MOUSE Treacle protein OS=Mus musculus OX=10090 GN=Tcof1 PE=1 SV=1	0.627632	0.0741432	2.26732	5.58527e-10	100.39	83.704	100.39	0.567888	1.21915	0.000280113	74.029	0.627632	2.26732	5.58527e-10	100.39	0.575206	1.33104	6.74211e-06	76.027	0.602177	1.80068	0.00550146	54.857	0.585545	1.5053	9.81875e-10	94.73	0.491395	0	0.000709469	49.088	0.607175	1.89116	7.51324e-10	96.351	0.495254	0	0.000103134	56.366	0.515917	0.814676	0.00189116	55.763
O08784	853	O08784	O08784	Treacle protein	Tcof1	sp|O08784|TCOF_MOUSE Treacle protein OS=Mus musculus OX=10090 GN=Tcof1 PE=1 SV=1	0.714402	0.0513897	3.98313	1.94564e-10	98.967	89.48	73.616	0.457695	0	0.00614419	42.885	0.643885	2.57363	9.0066e-07	75.018	0.498119	0	2.80439e-05	62.683	0.677767	3.25648	0.000137792	54.003	0.616675	2.10846	9.03431e-07	75.103	0.714402	3.98313	1.35507e-06	78.987	0.7069	3.82576	1.46837e-05	67.055	0.495254	0	0.000103134	56.366	0.626076	2.25617	3.35449e-05	60.348
O08784	154	O08784	O08784	Treacle protein	Tcof1	sp|O08784|TCOF_MOUSE Treacle protein OS=Mus musculus OX=10090 GN=Tcof1 PE=1 SV=1	0.999939	4.66029e-06	42.1798	3.11117e-12	133.13	106.38	133.13	0.999225	31.1035	9.60185e-08	123.76	0.999939	42.1798	3.11117e-12	133.13	0.999553	33.4988	6.16027e-08	126.71	0.989601	19.7847	0.000136969	104.55	0.99938	32.0715	9.2618e-05	101.2	0.99985	38.2487	9.69738e-08	123.68	0.999734	35.7529	5.29797e-09	128.82	0.986326	18.5816	3.10552e-05	100.11	0.98247	17.4867	0.000139323	83.37
O08792	161	O08792	O08792	Transcription factor COE2	Ebf2	sp|O08792|COE2_MOUSE Transcription factor COE2 OS=Mus musculus OX=10090 GN=Ebf2 PE=1 SV=4	0.5	0.121984	0	0.0121262	78.655	37.08	78.655					0	0		#NUM!	0.5	0	0.0491964	67.726									0.5	0	0.0121262	78.655					0	0		#NUM!
O08796	344	O08796	O08796	Eukaryotic elongation factor 2 kinase	Eef2k	sp|O08796|EF2K_MOUSE Eukaryotic elongation factor 2 kinase OS=Mus musculus OX=10090 GN=Eef2k PE=1 SV=1	0.55105	0.0985103	0.889927	0.00561136	60.49	48.907	60.49					0	0		#NUM!													0.55105	0.889927	0.00561136	60.49
O08796	365	O08796	O08796	Eukaryotic elongation factor 2 kinase	Eef2k	sp|O08796|EF2K_MOUSE Eukaryotic elongation factor 2 kinase OS=Mus musculus OX=10090 GN=Eef2k PE=1 SV=1	0.951521	0.00617054	13.2639	1.98443e-12	136.38	84.398	136.38	0.633265	5.14899	0.00344245	53.377	0.542503	3.17547	0.00148869	70.412	0.951521	13.2639	1.98443e-12	136.38	0.742437	6.98146	0.000357128	78.814	0.881317	12.3196	0.000520973	76.588	0.870612	11.2022	0.00086763	71.879	0.807928	8.52759	0.000654894	74.769	0.60383	3.42952	0.000638804	74.987	0.507839	3.22822	0.00298281	61.375
O08796	366	O08796	O08796	Eukaryotic elongation factor 2 kinase	Eef2k	sp|O08796|EF2K_MOUSE Eukaryotic elongation factor 2 kinase OS=Mus musculus OX=10090 GN=Eef2k PE=1 SV=1	0.362248	0.189544	0	0.0104909	58.098	7.9317	58.098	0.355522	0	0.0291947	52.495																									0.330837	0	0.0260266	51.875
O08796	367	O08796	O08796	Eukaryotic elongation factor 2 kinase	Eef2k	sp|O08796|EF2K_MOUSE Eukaryotic elongation factor 2 kinase OS=Mus musculus OX=10090 GN=Eef2k PE=1 SV=1	0.362248	0.189637	0	0.0104909	58.098	7.9317	58.098	0.355522	0	0.0291947	52.495																									0.330837	0	0.0260266	51.875
O08810	19	O08810	O08810	116 kDa U5 small nuclear ribonucleoprotein component	Eftud2	sp|O08810|U5S1_MOUSE 116 kDa U5 small nuclear ribonucleoprotein component OS=Mus musculus OX=10090 GN=Eftud2 PE=1 SV=1	0.810555	0.0306306	9.7807	1.69636e-05	68.304	62.584	68.304									0.810555	9.7807	1.69636e-05	68.304
O08856	310	O08856	O08856	RNA polymerase II elongation factor ELL	Ell	sp|O08856|ELL_MOUSE RNA polymerase II elongation factor ELL OS=Mus musculus OX=10090 GN=Ell PE=2 SV=2	0.895947	0.0153231	11.0366	5.30782e-10	103.02	90.889	103.02	0.722678	6.45494	0.00178547	48.597					0.821923	9.3947	0.000480388	57.432	0.895947	11.0366	5.30782e-10	103.02	0.656098	7.26097	0.00226185	47.281	0.84596	10.0089	7.66277e-05	72.935
O08919	324	O08919	O08919	Numb-like protein	Numbl	sp|O08919|NUMBL_MOUSE Numb-like protein OS=Mus musculus OX=10090 GN=Numbl PE=1 SV=3	0.964607	0.0043851	17.3646	0.0104486	40.798	29.754	40.798																													0.964607	17.3646	0.0104486	40.798
O08919	411	O08919	O08919	Numb-like protein	Numbl	sp|O08919|NUMBL_MOUSE Numb-like protein OS=Mus musculus OX=10090 GN=Numbl PE=1 SV=3	0.902494	0.0141814	10.5562	1.03655e-28	149.62	127.5	70.453	0.857149	7.78215	1.59264e-12	115.36	0.850333	7.99994	0.00247945	71.527					0.902494	10.5562	6.75725e-09	105.72	0.748538	4.76568	0.000428122	60.991	0.632712	2.38549	0.000164199	72.316	0.680596	3.77009	0.00516244	42.384	0.743266	4.71174	0.000716687	57.829	0.635851	2.44108	0.000224501	69.27
O08999	270	O08999	O08999	Latent-transforming growth factor beta-binding protein 2	Ltbp2	sp|O08999|LTBP2_MOUSE Latent-transforming growth factor beta-binding protein 2 OS=Mus musculus OX=10090 GN=Ltbp2 PE=1 SV=2	0.999998	5.45162e-08	60.3804	4.21e-13	127.5	119.64	101.71	0.999981	50.0769	4.21e-13	127.5	0.999449	35.4335	0.000304864	76.015	0.999125	33.4216	0.000509257	68.401	0.999998	60.3804	1.97412e-07	101.71	0.997897	29.6444	0.000633459	65.184	0.999974	48.3631	2.60132e-05	91.583	0.999575	36.5181	1.09402e-06	101.29	0.999993	54.6077	2.19067e-10	118.16	0.991636	23.621	0.00054099	67.579
O08999	491	O08999	O08999	Latent-transforming growth factor beta-binding protein 2	Ltbp2	sp|O08999|LTBP2_MOUSE Latent-transforming growth factor beta-binding protein 2 OS=Mus musculus OX=10090 GN=Ltbp2 PE=1 SV=2	0.92606	0.0101419	10.9776	5.69961e-13	121.63	101.19	110.75	0.845726	7.38938	7.65457e-08	104.86	0.794218	5.86532	0.000495974	67.563	0.835467	7.05676	8.53235e-06	96.016	0.92606	10.9776	1.11518e-08	110.75	0.818308	6.53582	1.51776e-05	91.583	0.897068	9.40275	2.2659e-11	112.58	0.867775	8.17093	5.69961e-13	121.63	0.899613	9.52377	1.01313e-11	118.16	0.872759	8.36267	2.28082e-06	100.19
O09039	129	O09039	O09039	SH2B adapter protein 3	Sh2b3	sp|O09039|SH2B3_MOUSE SH2B adapter protein 3 OS=Mus musculus OX=10090 GN=Sh2b3 PE=1 SV=2	0.821197	0.028595	13.5864	9.18668e-05	56.68	45.691	56.68									0.821197	13.5864	9.18668e-05	56.68
O09044	110	O09044	O09044	Synaptosomal-associated protein 23	Snap23	sp|O09044|SNP23_MOUSE Synaptosomal-associated protein 23 OS=Mus musculus OX=10090 GN=Snap23 PE=1 SV=1	0.974464	0.00301691	16.0094	6.26389e-70	173.35	161.27	119.62	0.754074	5.11522	5.87076e-18	117.82	0.922439	10.9198	2.31187e-18	120.27	0.916986	10.5281	6.64678e-27	146.81	0.974464	16.0094	6.26389e-70	173.35	0.933666	11.5136	1.28415e-30	139.73	0.940691	12.0508	7.64025e-49	156.43	0.879366	8.78046	1.72422e-30	138.92	0.901982	9.70116	8.4868e-39	143.05	0.784567	7.09507	4.51737e-05	63.697
O09044	112	O09044	O09044	Synaptosomal-associated protein 23	Snap23	sp|O09044|SNP23_MOUSE Synaptosomal-associated protein 23 OS=Mus musculus OX=10090 GN=Snap23 PE=1 SV=1	0.492111	0.134579	0	7.98375e-06	99.813	81.546	99.813													0.482229	0	0.00108336	70.555
O09106	421	O09106	O09106	Histone deacetylase 1	Hdac1	sp|O09106|HDAC1_MOUSE Histone deacetylase 1 OS=Mus musculus OX=10090 GN=Hdac1 PE=1 SV=1	1	0	33.5286	2.47416e-33	145.88	114	84.249					1	91.534	2.47416e-33	145.88	1	58.8476	2.62936e-10	106.75	1	22.4651	1.49504e-16	104.9	1	18.5244	4.96935e-05	62.918	1	61.9827	9.77225e-11	109.89	1	36.1928	1.85961e-14	119.69	0.714438	7.12024	9.84776e-05	58.21	1	24.0456	1.19501e-05	76.478
O09106	423	O09106	O09106	Histone deacetylase 1	Hdac1	sp|O09106|HDAC1_MOUSE Histone deacetylase 1 OS=Mus musculus OX=10090 GN=Hdac1 PE=1 SV=1	1	0	33.5286	2.47416e-33	145.88	114	84.249					1	91.534	2.47416e-33	145.88	1	58.8476	2.62936e-10	106.75	1	22.4651	1.49504e-16	104.9	1	18.5244	4.96935e-05	62.918	1	61.9827	9.77225e-11	109.89	1	36.1928	1.85961e-14	119.69	0.714438	7.12024	9.84776e-05	58.21	1	24.0456	1.19501e-05	76.478
O09106	393	O09106	O09106	Histone deacetylase 1	Hdac1	sp|O09106|HDAC1_MOUSE Histone deacetylase 1 OS=Mus musculus OX=10090 GN=Hdac1 PE=1 SV=1	1	0	41.4299	3.87474e-46	139.96	123.22	139.96	1	29.2177	1.45676e-27	121.61	1	42.5441	3.57509e-35	128	1	67.6668	7.50088e-46	137.97	1	44.7441	6.41624e-35	124.17	1	14.6108	3.12373e-10	88.582	1	43.632	3.98439e-26	114.92	1	28.3595	4.60446e-20	111.23	1	18.2064	1.42213e-13	95.172	1	20.4914	3.53263e-26	116.53
O35071	674	O35071	O35071	Kinesin-like protein KIF1C	Kif1c	sp|O35071|KIF1C_MOUSE Kinesin-like protein KIF1C OS=Mus musculus OX=10090 GN=Kif1c PE=1 SV=2	0.996708	0.000352093	25.2694	1.56304e-07	119.56	105.3	119.56					0.955318	14.0288	1.6111e-05	99.566	0.970346	15.802	0.000445675	76.391	0.945504	14.0306	0.00258111	52.522					0.996708	25.2694	1.56304e-07	119.56	0.975161	16.0922	0.000160226	87.519
O35071	676	O35071	O35071	Kinesin-like protein KIF1C	Kif1c	sp|O35071|KIF1C_MOUSE Kinesin-like protein KIF1C OS=Mus musculus OX=10090 GN=Kif1c PE=1 SV=2	0.910472	0.0126553	10.2558	1.56304e-07	119.56	105.3	76.391					0.845565	7.45464	1.6111e-05	99.566	0.910472	10.2558	0.000445675	76.391	0.893234	10.3094	0.00258111	52.522					0.890504	9.09741	1.56304e-07	119.56	0.861163	7.93277	0.000160226	87.519
O35071	1089	O35071	O35071	Kinesin-like protein KIF1C	Kif1c	sp|O35071|KIF1C_MOUSE Kinesin-like protein KIF1C OS=Mus musculus OX=10090 GN=Kif1c PE=1 SV=2	1	2.01009e-09	71.6613	0.00572699	86.738	67.495	86.738	0.999621	34.216	0.00572699	77.894	0.999986	48.6206	0.0392451	51.07	0	0		#NUM!	1	71.6613	0.0100277	86.738									0.979123	16.7117	0.00941741	43.557	0.999937	41.9978	0.0184759	60.178	0.99999	50.0204	0.0129363	65.12
O35126	646	O35126	O35126	Atrophin-1	Atn1	sp|O35126|ATN1_MOUSE Atrophin-1 OS=Mus musculus OX=10090 GN=Atn1 PE=1 SV=1	0.740332	0.0458345	5.91986	0.001835	57.989	49.17	55.575													0.433983	1.88422	0.00364276	48.656
O35130	16	O35130	O35130	Ribosomal RNA small subunit methyltransferase NEP1	Emg1	sp|O35130|NEP1_MOUSE Ribosomal RNA small subunit methyltransferase NEP1 OS=Mus musculus OX=10090 GN=Emg1 PE=1 SV=1	1	1.02824e-10	86.1573	2.51771e-48	188.27	149.93	157.97	1	77.9888	2.82705e-17	139.98	0.999998	59.5554	3.11775e-37	165.71	1	84.9527	6.40445e-30	152.71	1	70.8527	1.20083e-16	140.95	0.999999	60.6081	1.91229e-24	151.96	1	86.1573	3.67936e-31	157.97	1	64.1372	5.60378e-22	142.94	1	72.3627	6.40445e-30	152.71	0.99984	38.7064	4.33528e-08	110.77
O35136	2	O35136	O35136	Neural cell adhesion molecule 2	Ncam2	sp|O35136|NCAM2_MOUSE Neural cell adhesion molecule 2 OS=Mus musculus OX=10090 GN=Ncam2 PE=1 SV=1	1	0	11.6314	0.0115288	40.496	10.689	40.496					1	11.6314	0.0115288	40.496	0	0		#NUM!
O35136	6	O35136	O35136	Neural cell adhesion molecule 2	Ncam2	sp|O35136|NCAM2_MOUSE Neural cell adhesion molecule 2 OS=Mus musculus OX=10090 GN=Ncam2 PE=1 SV=1	1	0	11.6314	0.0115288	40.496	10.689	40.496					1	11.6314	0.0115288	40.496	0	0		#NUM!
O35144	366	O35144	O35144	Telomeric repeat-binding factor 2	Terf2	sp|O35144|TERF2_MOUSE Telomeric repeat-binding factor 2 OS=Mus musculus OX=10090 GN=Terf2 PE=1 SV=3	0.550579	0.0986943	3.05857	0.00282646	70.089	53.512	70.089	0	0		#NUM!
O35144	367	O35144	O35144	Telomeric repeat-binding factor 2	Terf2	sp|O35144|TERF2_MOUSE Telomeric repeat-binding factor 2 OS=Mus musculus OX=10090 GN=Terf2 PE=1 SV=3	0.83317	0.0258404	7.09444	4.66618e-12	133.25	118.56	104.16	0	0		#NUM!	0.675755	3.55304	0.000447871	92.703	0.83317	7.09444	5.86227e-07	104.16									0.62741	2.52436	0.000670875	67.645	0.761779	5.22515	4.66618e-12	133.25
O35188	259	O35188	O35188	Fractalkine;Processed fractalkine	Cx3cl1	sp|O35188|X3CL1_MOUSE Fractalkine OS=Mus musculus OX=10090 GN=Cx3cl1 PE=1 SV=3	0.574512	0.0900021	1.31873	1.45955e-06	82.007	59.354	82.007																													0.574512	1.31873	1.45955e-06	82.007
O35188	262	O35188	O35188	Fractalkine;Processed fractalkine	Cx3cl1	sp|O35188|X3CL1_MOUSE Fractalkine OS=Mus musculus OX=10090 GN=Cx3cl1 PE=1 SV=3	0.999799	1.51583e-05	36.9775	5.78146e-46	163.91	151.35	163.91	0.953585	13.628	0.000170232	70.315	0.991471	20.6756	2.10932e-05	85.881	0.997982	26.97	2.70592e-06	91.166	0.981297	17.4381	1.089e-06	94.201	0.997557	26.1467	3.32399e-10	111.4	0.996395	24.4436	5.49077e-22	132.83	0.997075	25.3321	7.30034e-13	118.36					0.999455	32.6378	5.1155e-30	152.06
O35216	15	O35216	O35216	Histone H3-like centromeric protein A	Cenpa	sp|O35216|CENPA_MOUSE Histone H3-like centromeric protein A OS=Mus musculus OX=10090 GN=Cenpa PE=2 SV=1	0.866192	0.019734	8.23693	0.00336345	71.548	51.761	50.088	0	0		#NUM!	0.626107	2.63477	0.023946	59.898	0.866192	8.23693	0.00336345	54.598	0.798026	6.93764	0.0475766	51.726	0	0		#NUM!	0	0		#NUM!	0.849491	7.73065	0.0414555	54.199	0.62291	2.73858	0.0697394	47.189
O35216	16	O35216	O35216	Histone H3-like centromeric protein A	Cenpa	sp|O35216|CENPA_MOUSE Histone H3-like centromeric protein A OS=Mus musculus OX=10090 GN=Cenpa PE=2 SV=1	0.658024	0.066823	2.98902	0.00336345	60.157	40.37	60.157	0	0		#NUM!	0	0		#NUM!	0.499756	0	0.00336345	54.598					0	0		#NUM!	0	0		#NUM!									0.658024	2.98902	0.023052	60.157
O35218	419	O35218	O35218	Cleavage and polyadenylation specificity factor subunit 2	Cpsf2	sp|O35218|CPSF2_MOUSE Cleavage and polyadenylation specificity factor subunit 2 OS=Mus musculus OX=10090 GN=Cpsf2 PE=1 SV=1	0.999965	2.42967e-06	44.5543	9.42011e-44	138.33	133.78	69.922					0.999351	31.9734	2.29455e-33	129.72	0.999965	44.5543	6.38554e-25	121.01	0.998264	29.4273	1.06416e-07	83.088	0.939385	11.3394	0.000569231	70.051	0.999082	30.6675	9.42011e-44	138.33	0.994503	22.6688	3.08728e-24	117.73	0	0		#NUM!	0.94249	12.7461	1.65344e-05	68.834
O35218	420	O35218	O35218	Cleavage and polyadenylation specificity factor subunit 2	Cpsf2	sp|O35218|CPSF2_MOUSE Cleavage and polyadenylation specificity factor subunit 2 OS=Mus musculus OX=10090 GN=Cpsf2 PE=1 SV=1	0.999962	2.77283e-06	44.1671	9.42011e-44	138.33	133.78	69.922					0.999351	31.9734	2.29455e-33	129.72	0.999962	44.1671	6.38554e-25	121.01	0.998264	29.4273	1.06416e-07	83.088	0.939385	11.3394	0.000569231	70.051	0.999082	30.6675	9.42011e-44	138.33	0.994505	22.6688	3.08728e-24	117.73	0	0		#NUM!	0.94249	12.7461	1.65344e-05	68.834
O35218	423	O35218	O35218	Cleavage and polyadenylation specificity factor subunit 2	Cpsf2	sp|O35218|CPSF2_MOUSE Cleavage and polyadenylation specificity factor subunit 2 OS=Mus musculus OX=10090 GN=Cpsf2 PE=1 SV=1	0.999962	2.80836e-06	44.1671	9.42011e-44	138.33	133.78	69.922					0.999351	31.9734	2.29455e-33	129.72	0.999962	44.1671	6.38554e-25	121.01	0.998427	29.4273	1.06416e-07	83.088	0.939385	11.3394	0.000569231	70.051	0.999022	30.7045	9.42011e-44	138.33	0.994482	22.6688	3.08728e-24	117.73	0	0		#NUM!	0.94249	12.7461	1.65344e-05	68.834
O35245	810	O35245	O35245	Polycystin-2	Pkd2	sp|O35245|PKD2_MOUSE Polycystin-2 OS=Mus musculus OX=10090 GN=Pkd2 PE=1 SV=2	0.917298	0.011395	11.0618	1.67849e-05	90.412	81.007	90.412																					0.917298	11.0618	1.67849e-05	90.412
O35295	6	O35295	O35295	Transcriptional regulator protein Pur-beta	Purb	sp|O35295|PURB_MOUSE Transcriptional regulator protein Pur-beta OS=Mus musculus OX=10090 GN=Purb PE=1 SV=3	1	0	6.94406	2.41347e-176	241.01	232.32	48.65	1	55.738	4.41311e-161	229.17	1	106.209	7.47669e-148	219.16	1	59.2557	7.59712e-137	212.46	1	19.227	4.36573e-119	192.96	1	6.88155	3.50206e-119	194.9	1	71.4966	1.64243e-104	188.8	1	45.2858	1.61866e-147	214.67	1	36.3648	5.41192e-150	222.99	1	5.12566	2.41347e-176	241.01
O35295	8	O35295	O35295	Transcriptional regulator protein Pur-beta	Purb	sp|O35295|PURB_MOUSE Transcriptional regulator protein Pur-beta OS=Mus musculus OX=10090 GN=Purb PE=1 SV=3	1	0	6.94406	6.63785e-104	184.81	174.5	48.65	1	55.738	1.01302e-16	108.15	1	106.209	3.12729e-89	172.52	1	59.2557	7.43219e-53	150.19	1	19.227	2.03055e-52	146.7	1	6.88155	1.81665e-32	125.42	1	71.4966	5.61585e-63	157.16	1	45.2858	1.90011e-63	160.58	1	36.3648	6.02577e-75	162.82	1	5.12566	6.63785e-104	184.81
O35295	112	O35295	O35295	Transcriptional regulator protein Pur-beta	Purb	sp|O35295|PURB_MOUSE Transcriptional regulator protein Pur-beta OS=Mus musculus OX=10090 GN=Purb PE=1 SV=3	0.506847	0.114701	0.57737	3.68524e-06	56.504	47.209	56.504
O35295	113	O35295	O35295	Transcriptional regulator protein Pur-beta	Purb	sp|O35295|PURB_MOUSE Transcriptional regulator protein Pur-beta OS=Mus musculus OX=10090 GN=Purb PE=1 SV=3	0.809816	0.0309579	6.294	6.00396e-106	180.47	158.39	180.47					0.782439	5.56491	7.23205e-19	102.78	0.809816	6.294	6.00396e-106	180.47
O35295	310	O35295	O35295	Transcriptional regulator protein Pur-beta	Purb	sp|O35295|PURB_MOUSE Transcriptional regulator protein Pur-beta OS=Mus musculus OX=10090 GN=Purb PE=1 SV=3	0.694895	0.0563326	3.57471	3.04485e-13	117.48	110.63	117.48													0.687074	3.41562	1.45215e-09	101.3
O35295	316	O35295	O35295	Transcriptional regulator protein Pur-beta	Purb	sp|O35295|PURB_MOUSE Transcriptional regulator protein Pur-beta OS=Mus musculus OX=10090 GN=Purb PE=1 SV=3	0.821419	0.0284906	6.62729	2.32522e-13	123.02	117.24	79.614																	0.668269	3.04165	2.32522e-13	123.02	0.570834	1.23885	1.02382e-09	114.7
O35326;Q3TWW8;Q8VE97	116;118;112	O35326;Q3TWW8;Q8VE97	Q3TWW8	Serine/arginine-rich splicing factor 5;Serine/arginine-rich splicing factor 6;Serine/arginine-rich splicing factor 4	Srsf5;Srsf6;Srsf4	sp|O35326|SRSF5_MOUSE Serine/arginine-rich splicing factor 5 OS=Mus musculus OX=10090 GN=Srsf5 PE=1 SV=2;sp|Q3TWW8|SRSF6_MOUSE Serine/arginine-rich splicing factor 6 OS=Mus musculus OX=10090 GN=Srsf6 PE=1 SV=1;sp|Q8VE97|SRSF4_MOUSE Serine/arginine-rich spl	0.5	0.117464	0	0.00785231	84.658	32.38	84.658									0.5	0	0.00785231	84.658
O35326;Q3TWW8;Q8VE97	117;119;113	O35326;Q3TWW8;Q8VE97	Q3TWW8	Serine/arginine-rich splicing factor 5;Serine/arginine-rich splicing factor 6;Serine/arginine-rich splicing factor 4	Srsf5;Srsf6;Srsf4	sp|O35326|SRSF5_MOUSE Serine/arginine-rich splicing factor 5 OS=Mus musculus OX=10090 GN=Srsf5 PE=1 SV=2;sp|Q3TWW8|SRSF6_MOUSE Serine/arginine-rich splicing factor 6 OS=Mus musculus OX=10090 GN=Srsf6 PE=1 SV=1;sp|Q8VE97|SRSF4_MOUSE Serine/arginine-rich spl	0.5	0.118793	0	0.00785231	84.658	32.38	84.658									0.5	0	0.00785231	84.658
O35344	60	O35344	O35344	Importin subunit alpha-4	Kpna3	sp|O35344|IMA4_MOUSE Importin subunit alpha-4 OS=Mus musculus OX=10090 GN=Kpna3 PE=1 SV=1	0.984911	0.00179097	18.1473	5.49997e-12	113.47	92.227	86.453									0.972267	15.4479	6.09793e-06	86.213													0.984911	18.1473	6.01832e-05	86.453
O35379	289	O35379	O35379	Multidrug resistance-associated protein 1	Abcc1	sp|O35379|MRP1_MOUSE Multidrug resistance-associated protein 1 OS=Mus musculus OX=10090 GN=Abcc1 PE=1 SV=1	0.543295	0.10192	0.753997	0.000789283	74.786	61.358	53.448	0.543295	0.753997	0.0123399	53.448	0	0		#NUM!					0	0		#NUM!					0.538259	0.665937	0.000789283	74.786	0.538259	0.665937	0.0035986	66.022					0	0		#NUM!
O35379	290	O35379	O35379	Multidrug resistance-associated protein 1	Abcc1	sp|O35379|MRP1_MOUSE Multidrug resistance-associated protein 1 OS=Mus musculus OX=10090 GN=Abcc1 PE=1 SV=1	0.82375	0.028076	6.69665	2.35939e-06	101.15	84.235	101.15	0	0		#NUM!	0	0		#NUM!	0.82375	6.69665	2.35939e-06	101.15	0	0		#NUM!																	0	0		#NUM!
O35381;Q64G17	17;17	O35381	O35381	Acidic leucine-rich nuclear phosphoprotein 32 family member A;Putative acidic leucine-rich nuclear phosphoprotein 32 family member C	Anp32a;Anp32c	sp|O35381|AN32A_MOUSE Acidic leucine-rich nuclear phosphoprotein 32 family member A OS=Mus musculus OX=10090 GN=Anp32a PE=1 SV=1;sp|Q64G17|AN32C_MOUSE Putative acidic leucine-rich nuclear phosphoprotein 32 family member C OS=Mus musculus OX=10090 GN=Anp32c	0.649862	0.0685905	2.68582	0.000482836	83.063	74.244	83.063	0.631226	2.33424	0.000706025	69.122	0.636397	2.43101	0.00473266	54.008	0	0		#NUM!	0.629574	2.30345	0.000482836	74.776	0.644345	2.5809	0.0168778	41.41	0.626296	2.24253	0.0154425	42.618	0.607982	1.90585	0.0130238	44.441
O35492	9	O35492	O35492	Dual specificity protein kinase CLK3	Clk3	sp|O35492|CLK3_MOUSE Dual specificity protein kinase CLK3 OS=Mus musculus OX=10090 GN=Clk3 PE=1 SV=3	0.988422	0.00133179	19.3326	1.17941e-21	170.98	137.23	111.74	0.953099	13.0883	9.29362e-14	136.08	0.956472	13.419	1.17941e-21	170.98	0.981102	17.1529	6.38787e-19	153.97	0.888323	9.00607	1.27095e-13	133.86	0.973142	15.591	4.29969e-18	148.41	0.942652	12.9044	9.66887e-18	142.62	0.977142	16.3098	3.6236e-08	121.92	0.968564	14.8871	6.43984e-18	146.1	0.978375	16.5554	7.87527e-14	136.99
O35493	136	O35493	O35493	Dual specificity protein kinase CLK4	Clk4	sp|O35493|CLK4_MOUSE Dual specificity protein kinase CLK4 OS=Mus musculus OX=10090 GN=Clk4 PE=1 SV=1	0.977345	0.00258002	16.2468	0.000351777	52.122	37.529	52.122									0.977345	16.2468	0.000351777	52.122
O35493	138	O35493	O35493	Dual specificity protein kinase CLK4	Clk4	sp|O35493|CLK4_MOUSE Dual specificity protein kinase CLK4 OS=Mus musculus OX=10090 GN=Clk4 PE=1 SV=1	0.977326	0.00259016	16.2433	0.000351777	52.122	37.529	52.122									0.977326	16.2433	0.000351777	52.122
O35493;P22518	339;340	O35493	O35493	Dual specificity protein kinase CLK4;Dual specificity protein kinase CLK1	Clk4;Clk1	sp|O35493|CLK4_MOUSE Dual specificity protein kinase CLK4 OS=Mus musculus OX=10090 GN=Clk4 PE=1 SV=1;sp|P22518|CLK1_MOUSE Dual specificity protein kinase CLK1 OS=Mus musculus OX=10090 GN=Clk1 PE=1 SV=2	0.623576	0.0755808	2.74178	2.9797e-31	141.48	130.42	130.01	0.417529	1.81496	1.39318e-07	88.571					0.612545	2.85876	2.9797e-31	141.48	0.427838	2.45392	2.32981e-23	127.73					0.487311	1.86149	0.000776735	47.73	0.444045	1.90531	1.38514e-06	78.128	0.340573	1.35292	0.000194469	55.526
O35495	24	O35495	O35495	Cyclin-dependent kinase 14	Cdk14	sp|O35495|CDK14_MOUSE Cyclin-dependent kinase 14 OS=Mus musculus OX=10090 GN=Cdk14 PE=1 SV=2	0.98165	0.00212597	17.6119	0.000752134	98.048	84.54	91.584	0.967601	16.0356	0.00149701	87.258	0.966803	16.0356	0.00508842	77.192	0.947902	12.9361	0.00991764	70.399	0.98165	17.6119	0.000827594	91.584	0.910761	11.2786	0.0354097	50.194	0.978785	19.0678	0.000752134	98.048	0.972671	16.0356	0.00130279	88.496	0.889091	11.2786	0.00478967	77.662	0.889091	11.2786	0.0136495	67.334
O35551	407	O35551	O35551	Rab GTPase-binding effector protein 1	Rabep1	sp|O35551|RABE1_MOUSE Rab GTPase-binding effector protein 1 OS=Mus musculus OX=10090 GN=Rabep1 PE=1 SV=2	0.99445	0.000626051	22.5932	1.4914e-88	214.66	155.24	147.09	0.953892	13.8689	7.76384e-05	94.01	0.99418	22.3255	1.4914e-88	214.66	0.984677	18.0871	5.55304e-53	179.74	0.957873	13.6116	1.50996e-88	214.55	0.963242	14.1844	1.25872e-31	160.64	0.99445	22.5932	4.04833e-44	164.2	0.978742	16.6468	3.29282e-53	178.43	0.93919	12.0798	1.01972e-07	110.12	0.981657	17.3761	5.61742e-17	137.32
O35623	50	O35623	O35623	BET1 homolog	Bet1	sp|O35623|BET1_MOUSE BET1 homolog OS=Mus musculus OX=10090 GN=Bet1 PE=1 SV=1	0.999933	4.94531e-06	41.763	1.44803e-16	148.13	100.01	140.45	0.989069	19.5656	9.81708e-08	110.12	0.999933	41.763	4.83293e-07	113.99	0.997964	26.9024	9.47641e-05	103.14	0.999359	31.9271	4.50688e-12	124.29	0.998608	28.5579	9.29768e-13	130.39	0.996462	24.4976	5.25958e-12	148.13	0.999933	41.763	1.44803e-16	140.45	0.998484	28.1852	1.77472e-16	132.59	0.995681	23.6278	1.55889e-12	129.32
O35691	66	O35691	O35691	Pinin	Pnn	sp|O35691|PININ_MOUSE Pinin OS=Mus musculus OX=10090 GN=Pnn PE=1 SV=4	0.999995	2.13003e-07	53.0944	1.75618e-21	171.49	146.86	160.62	0.993632	21.9321	3.62602e-06	120.57	0.999974	45.8348	2.6589e-18	160.16	0.999977	46.469	1.80837e-18	160.86	0.999995	53.0944	2.09926e-18	160.62	0.997234	25.5701	3.62602e-06	120.57	0.999958	43.803	5.14324e-13	138.42	0.999523	33.2113	9.64436e-17	146.5	0.99948	32.8343	3.80699e-09	131.17	0.997576	26.144	3.62602e-06	120.57
O35691	100	O35691	O35691	Pinin	Pnn	sp|O35691|PININ_MOUSE Pinin OS=Mus musculus OX=10090 GN=Pnn PE=1 SV=4	0.991053	0.00100274	25.4081	2.06114e-05	70.028	64.248	70.028	0.985134	23.1945	3.79382e-05	64.726									0.938747	17.4318	0.00158625	43.103	0.986676	24.0012	8.02909e-05	59.228													0	0		#NUM!
O35737;P70333	104;104	O35737;P70333	O35737	Heterogeneous nuclear ribonucleoprotein H;Heterogeneous nuclear ribonucleoprotein H, N-terminally processed;Heterogeneous nuclear ribonucleoprotein H2;Heterogeneous nuclear ribonucleoprotein H2, N-terminally processed	Hnrnph1;Hnrnph2	sp|O35737|HNRH1_MOUSE Heterogeneous nuclear ribonucleoprotein H OS=Mus musculus OX=10090 GN=Hnrnph1 PE=1 SV=3;sp|P70333|HNRH2_MOUSE Heterogeneous nuclear ribonucleoprotein H2 OS=Mus musculus OX=10090 GN=Hnrnph2 PE=1 SV=1	1	2.19314e-10	80.5577	0	357.3	292.18	282.87	0.999445	32.5554	4.81878e-79	221.13	1	70.3011	1.70762e-233	301.65	1	73.3958	5.28922e-289	316.9	0.999991	51.4464	9.73531e-142	255.07	0.999917	40.9063	9.54493e-142	255.23	1	68.7926	1.1689e-207	286.65	0.999974	45.7703	4.08553e-260	306.2	0.999092	30.7032	3.4607e-23	147.09	0.999956	43.6285	1.95392e-123	247.79
O35841	464	O35841	O35841	Apoptosis inhibitor 5	Api5	sp|O35841|API5_MOUSE Apoptosis inhibitor 5 OS=Mus musculus OX=10090 GN=Api5 PE=1 SV=2	0.930799	0.00941717	14.0079	2.58143e-41	156.74	127.47	141.69					0.573426	2.86896	8.30454e-08	97.5	0.915577	11.6172	1.19932e-19	129.9	0.749259	6.07448	3.14933e-26	136.56	0.657959	5.13109	4.3065e-10	104.67	0.930799	14.0079	2.33164e-27	141.69	0.891511	13.3513	4.41262e-33	142.45	0.426847	3.71163	0.0630406	48.5	0.666797	5.30574	4.61592e-14	118.22
O54724	42	O54724	O54724	Caveolae-associated protein 1	Cavin1	sp|O54724|CAVN1_MOUSE Caveolae-associated protein 1 OS=Mus musculus OX=10090 GN=Cavin1 PE=1 SV=1	0.902664	0.0141487	10.0497	8.63468e-23	149.35	129.61	122.78	0.651298	3.19404	0.00747167	54.234	0.50235	0.382866	4.52252e-16	133.48	0.70115	3.73057	8.63468e-23	149.35													0.786859	7.08669	0.000149726	94.532
O54724	367	O54724	O54724	Caveolae-associated protein 1	Cavin1	sp|O54724|CAVN1_MOUSE Caveolae-associated protein 1 OS=Mus musculus OX=10090 GN=Cavin1 PE=1 SV=1	0.475426	0.141178	0	2.49148e-32	125.58	117.24	125.58	0	0		#NUM!	0	0		#NUM!	0.44596	0	2.80268e-23	108.28	0	0		#NUM!	0.441963	0	1.16081e-07	84.635	0.441995	0	6.05086e-18	107.47
O54724	368	O54724	O54724	Caveolae-associated protein 1	Cavin1	sp|O54724|CAVN1_MOUSE Caveolae-associated protein 1 OS=Mus musculus OX=10090 GN=Cavin1 PE=1 SV=1	0.475426	0.141268	0	2.49148e-32	125.58	117.24	125.58	0	0		#NUM!	0	0		#NUM!	0.44596	0	2.80268e-23	108.28	0	0		#NUM!	0.441963	0	1.16081e-07	84.635	0.441995	0	6.05086e-18	107.47									0.427913	0.367696	0.000227631	52.187
O54724	389	O54724	O54724	Caveolae-associated protein 1	Cavin1	sp|O54724|CAVN1_MOUSE Caveolae-associated protein 1 OS=Mus musculus OX=10090 GN=Cavin1 PE=1 SV=1	0.999995	2.07491e-07	53.5952	1.89295e-33	131.16	121.86	125.58	0	0		#NUM!	0.955735	21.3584	3.65406e-05	67.829	0.999993	53.7577	2.80268e-23	108.28	0.9502	15.8244	5.3779e-05	61.939	0.99992	42.7235	1.16081e-07	84.635	0.999907	42.5157	6.05086e-18	107.47	0.991987	26.4634	1.80644e-17	110.98	0.965572	19.5804	1.71688e-05	74.869	0.96732	21.3394	3.3679e-05	68.807
O54724	391	O54724	O54724	Caveolae-associated protein 1	Cavin1	sp|O54724|CAVN1_MOUSE Caveolae-associated protein 1 OS=Mus musculus OX=10090 GN=Cavin1 PE=1 SV=1	0.999997	1.5158e-07	55.0263	1.89295e-33	131.16	121.86	125.58	0	0		#NUM!	0.95574	21.3584	3.65406e-05	67.829	0.999995	54.8536	2.80268e-23	108.28	0.950553	15.8244	5.3779e-05	61.939	0.999934	43.8076	1.16081e-07	84.635	0.999922	43.6269	6.05086e-18	107.47	0.992428	27.1868	1.80644e-17	110.98	0.968267	20.5172	1.71688e-05	74.869	0.967599	21.4477	3.3679e-05	68.807
O54724	302	O54724	O54724	Caveolae-associated protein 1	Cavin1	sp|O54724|CAVN1_MOUSE Caveolae-associated protein 1 OS=Mus musculus OX=10090 GN=Cavin1 PE=1 SV=1	0.999903	7.02205e-06	40.1225	2.62354e-68	228.06	197.67	204.67	0.812663	6.37305	8.80999e-26	186.74	0.943305	12.2111	1.11189e-11	151.79	0.99683	24.9762	6.86775e-12	153.25	0.959052	13.696	5.28562e-15	167.99	0.999875	39.0251	1.10264e-33	194.52	0.978632	16.6085	2.82926e-19	173.6	0.998419	28.0042	4.76872e-34	199.21	0.99896	29.8266	2.62354e-68	228.06	0.999903	40.1225	1.82072e-43	204.67
O54724	169	O54724	O54724	Caveolae-associated protein 1	Cavin1	sp|O54724|CAVN1_MOUSE Caveolae-associated protein 1 OS=Mus musculus OX=10090 GN=Cavin1 PE=1 SV=1	0.988235	0.0013996	19.2427	1.0712e-36	157.83	150.95	114.76	0.858737	7.83839	6.52055e-17	125.78	0.90415	9.74649	1.03703e-16	122.78	0.988235	19.2427	1.6224e-17	125.39	0.92158	10.7011	3.48528e-36	151.91	0.854833	7.70016	1.72407e-08	106.45	0.877153	8.53712	1.0712e-36	157.83	0.935787	11.6355	8.09174e-12	112.13	0.844673	7.35457	1.35577e-06	92.426	0.859463	7.86439	6.0427e-09	106.35
O54724	171	O54724	O54724	Caveolae-associated protein 1	Cavin1	sp|O54724|CAVN1_MOUSE Caveolae-associated protein 1 OS=Mus musculus OX=10090 GN=Cavin1 PE=1 SV=1	0.493955	0.132617	0	0.00703044	41.45	35.355	41.45	0	0		#NUM!													0	0		#NUM!	0	0		#NUM!					0	0		#NUM!	0.493955	0	0.00703044	41.45
O54724	173	O54724	O54724	Caveolae-associated protein 1	Cavin1	sp|O54724|CAVN1_MOUSE Caveolae-associated protein 1 OS=Mus musculus OX=10090 GN=Cavin1 PE=1 SV=1	0.999233	6.49756e-05	31.1478	0.00176757	104.82	45.756	93.928					0.910684	10.125	0.0504269	61.833	0.826215	6.79629	0.0580874	59.367	0.999233	31.1478	0.00198318	93.928	0.818236	6.6191	0.0360549	66.595	0.966661	14.8538	0.0177068	73.951	0.926614	11.015	0.00176757	101.38	0.964195	14.3331	0.0336725	67.385	0.908273	10.0021	0.00803396	80.102
O54724	20	O54724	O54724	Caveolae-associated protein 1	Cavin1	sp|O54724|CAVN1_MOUSE Caveolae-associated protein 1 OS=Mus musculus OX=10090 GN=Cavin1 PE=1 SV=1	0.757776	0.0419894	4.95568	0	334.18	319.55	268.75	0	0		#NUM!	0	0		#NUM!	0.293825	0	0.00237048	41.174	0	0		#NUM!	0.645944	2.61166	0	334.18	0.757776	4.95568	9.60505e-291	268.75	0.487782	0	7.94624e-26	114.61	0.392339	0	2.67729e-07	56.41	0	0		#NUM!
O54724	21	O54724	O54724	Caveolae-associated protein 1	Cavin1	sp|O54724|CAVN1_MOUSE Caveolae-associated protein 1 OS=Mus musculus OX=10090 GN=Cavin1 PE=1 SV=1	0.988517	0.00132051	19.3612	0	425.12	411.68	349.31	0.955889	13.3709	0	362.68	0.949734	12.7711	0	343.06	0.988517	19.3612	0	349.31	0.949535	12.7808	0	388.9	0.671977	3.11544	0	287.23	0.835034	7.04312	0	425.12	0.821294	6.62484	0	358.88	0.89115	9.13261	0	360.75	0.967919	14.8017	0	330.94
O54774	754	O54774	O54774	AP-3 complex subunit delta-1	Ap3d1	sp|O54774|AP3D1_MOUSE AP-3 complex subunit delta-1 OS=Mus musculus OX=10090 GN=Ap3d1 PE=1 SV=1	0.544811	0.10109	1.02028	0.00478003	43.611	33.862	43.611	0.544811	1.02028	0.00478003	43.611
O54774	755	O54774	O54774	AP-3 complex subunit delta-1	Ap3d1	sp|O54774|AP3D1_MOUSE AP-3 complex subunit delta-1 OS=Mus musculus OX=10090 GN=Ap3d1 PE=1 SV=1	0.988598	0.00130371	20.2592	2.3373e-61	192.6	177.18	118.52	0.867577	8.45186	4.8627e-05	95.197	0.967869	14.7743	2.3373e-61	192.6	0.970088	15.1504	6.48142e-35	159.44	0.961491	14.3714	1.20198e-15	125.23	0.811145	8.45186	1.18405e-05	87.659	0.988598	20.2592	2.14293e-18	131.04	0.953403	14.1896	6.16312e-18	129.27	0.593452	0.504196	0.000957016	79.013	0.860084	8.70531	0.0011583	77.137
O54774	760	O54774	O54774	AP-3 complex subunit delta-1	Ap3d1	sp|O54774|AP3D1_MOUSE AP-3 complex subunit delta-1 OS=Mus musculus OX=10090 GN=Ap3d1 PE=1 SV=1	0.999956	3.19681e-06	43.7973	5.69258e-196	283.49	266.96	144.26	0.944146	12.366	2.45732e-44	162.41	0.996267	24.702	2.3373e-61	192.6	0.999956	43.7973	5.69258e-196	283.49	0.994183	22.342	2.88425e-45	171.26	0.9663	14.4165	2.50691e-11	118.21	0.993885	22.6024	3.59743e-53	173.51	0.99687	25.5227	9.3154e-68	197.29	0.971794	15.4637	1.49127e-44	166.35	0.969403	15.0244	9.15007e-35	155.1
O54774	784	O54774	O54774	AP-3 complex subunit delta-1	Ap3d1	sp|O54774|AP3D1_MOUSE AP-3 complex subunit delta-1 OS=Mus musculus OX=10090 GN=Ap3d1 PE=1 SV=1	0.997502	0.000256034	26.4791	5.10972e-11	95.042	84.039	95.042	0.927958	11.9651	4.82911e-05	61.829	0.799216	8.15651	0.000162415	54.583	0.977619	17.8583	2.07484e-05	75.343									0.832	7.95088	0.000107119	55.043	0.97801	18.9711	4.56546e-05	68.326					0	0		#NUM!
O54781	487	O54781	O54781	SRSF protein kinase 2;SRSF protein kinase 2 N-terminal;SRSF protein kinase 2 C-terminal	Srpk2	sp|O54781|SRPK2_MOUSE SRSF protein kinase 2 OS=Mus musculus OX=10090 GN=Srpk2 PE=1 SV=2	0.889833	0.0160323	8.86497	0.00824658	57.804	44.087	57.804
O54781	489	O54781	O54781	SRSF protein kinase 2;SRSF protein kinase 2 N-terminal;SRSF protein kinase 2 C-terminal	Srpk2	sp|O54781|SRPK2_MOUSE SRSF protein kinase 2 OS=Mus musculus OX=10090 GN=Srpk2 PE=1 SV=2	0.468954	0.14423	0	0.00824658	57.804	44.087	57.804
O54781	490	O54781	O54781	SRSF protein kinase 2;SRSF protein kinase 2 N-terminal;SRSF protein kinase 2 C-terminal	Srpk2	sp|O54781|SRPK2_MOUSE SRSF protein kinase 2 OS=Mus musculus OX=10090 GN=Srpk2 PE=1 SV=2	0.468954	0.14414	0	0.00824658	57.804	44.087	57.804
O54785	289	O54785	O54785	LIM domain kinase 2	Limk2	sp|O54785|LIMK2_MOUSE LIM domain kinase 2 OS=Mus musculus OX=10090 GN=Limk2 PE=1 SV=2	0.952	0.00613273	13.5412	6.55587e-18	117.57	108.71	117.57	0.885804	9.12125	7.36634e-18	117.03	0.823951	7.7988	3.91305e-05	65.165	0.906276	11.1013	7.20657e-08	88.595	0.952	13.5412	6.55587e-18	117.57	0.777168	7.50169	8.91409e-07	79.875	0.724242	4.46164	2.48845e-13	104.51	0.54311	1.97431	3.91871e-05	64.315	0.530082	2.52013	0.000944296	48.634	0.726671	5.78107	5.31612e-05	62.683
O54804	71	O54804	O54804	Choline kinase alpha	Chka	sp|O54804|CHKA_MOUSE Choline kinase alpha OS=Mus musculus OX=10090 GN=Chka PE=1 SV=3	0.963421	0.00463505	14.2058	2.98635e-05	59.052	53.893	59.052									0.768382	5.20806	9.29382e-05	52.341																	0.753245	4.8467	0.000436607	46.981	0.80221	6.08085	6.14546e-05	55.691
O54825	97	O54825	O54825	Bystin	Bysl	sp|O54825|BYST_MOUSE Bystin OS=Mus musculus OX=10090 GN=Bysl PE=1 SV=3	1	9.34178e-12	92.6277	5.87356e-59	167.56	157.09	167.56	0.995398	23.3503	7.68415e-05	65.454	1	92.6277	5.87356e-59	167.56																	1	67.2292	9.38108e-24	124.57	0.996206	24.1931	9.1359e-14	107.45
O54916	708	O54916	O54916	RalBP1-associated Eps domain-containing protein 1	Reps1	sp|O54916|REPS1_MOUSE RalBP1-associated Eps domain-containing protein 1 OS=Mus musculus OX=10090 GN=Reps1 PE=1 SV=2	1	5.29238e-15	120.973	2.78814e-60	188.48	179.66	188.48					0.999999	58.8025	1.44349e-27	148.89	1	120.973	2.78814e-60	188.48	1	76.6093	8.66445e-45	162.43	0.999998	58.0509	7.65246e-08	104.81	1	81.0297	2.96045e-35	155.71	1	92.6184	8.66445e-45	162.43					0.9964	24.4219	0.000738767	61.942
O54916	272	O54916	O54916	RalBP1-associated Eps domain-containing protein 1	Reps1	sp|O54916|REPS1_MOUSE RalBP1-associated Eps domain-containing protein 1 OS=Mus musculus OX=10090 GN=Reps1 PE=1 SV=2	0.925172	0.0102486	12.6063	6.46696e-45	165.38	154	158.37	0.768288	7.22414	0.000611888	65.213	0.737258	6.80175	0.000111835	84.156	0.686597	5.61198	0.000219264	78.236	0.895709	11.2129	1.15663e-05	94.359	0.729684	6.66614	4.08916e-06	99.11	0.64978	3.25238	2.37914e-11	112.58	0.668757	5.27748	1.96829e-05	91.238	0.843464	9.01891	4.48204e-27	142.45	0.906827	11.6463	6.46696e-45	165.38
O54916	273	O54916	O54916	RalBP1-associated Eps domain-containing protein 1	Reps1	sp|O54916|REPS1_MOUSE RalBP1-associated Eps domain-containing protein 1 OS=Mus musculus OX=10090 GN=Reps1 PE=1 SV=2	0.58035	0.0878462	2.509	0.000731514	62.677	53.019	49.186									0.447824	0	0.000731514	62.677	0.519554	1.86881	0.00191375	51.857	0.502687	1.67602	0.00625166	42.347	0.503523	1.72787	0.00139801	56.215	0.44606	0	0.00648876	41.86	0.447848	0	0.001246	57.499
O54916	274	O54916	O54916	RalBP1-associated Eps domain-containing protein 1	Reps1	sp|O54916|REPS1_MOUSE RalBP1-associated Eps domain-containing protein 1 OS=Mus musculus OX=10090 GN=Reps1 PE=1 SV=2	0.447848	0.154021	0	0.000731514	62.677	53.019	57.499									0.447824	0	0.000731514	62.677													0.446275	0	0.00648876	41.86	0.447848	0	0.001246	57.499
O54931	314	O54931	O54931	PALM2-AKAP2 fusion protein	Pakap	sp|O54931|AKAP2_MOUSE PALM2-AKAP2 fusion protein OS=Mus musculus OX=10090 GN=Pakap PE=1 SV=4	0.50133	0.116796	1.48576	0.000170207	89.261	62.453	59.9																					0.50133	1.48576	0.0017237	59.9	0.474563	1.19565	0.000170207	89.261
O54931	316	O54931	O54931	PALM2-AKAP2 fusion protein	Pakap	sp|O54931|AKAP2_MOUSE PALM2-AKAP2 fusion protein OS=Mus musculus OX=10090 GN=Pakap PE=1 SV=4	0.450765	0.153391	2.15222	0.00139472	61.648	36.57	61.648
O54931	318	O54931	O54931	PALM2-AKAP2 fusion protein	Pakap	sp|O54931|AKAP2_MOUSE PALM2-AKAP2 fusion protein OS=Mus musculus OX=10090 GN=Pakap PE=1 SV=4	0.548147	0.0994304	2.71961	0.000575165	78.441	59.37	78.441	0.431156	1.80671	0.00620567	46.663	0.433309	1.84481	0.00141644	61.167	0.456668	1.58621	0.00264968	52.298	0.548147	2.71961	0.000575165	78.441
O54931	936	O54931	O54931	PALM2-AKAP2 fusion protein	Pakap	sp|O54931|AKAP2_MOUSE PALM2-AKAP2 fusion protein OS=Mus musculus OX=10090 GN=Pakap PE=1 SV=4	0.998887	9.22861e-05	29.5314	7.36113e-07	134.13	106.7	96.103	0.968516	14.8801	0.000237983	121.02	0.998887	29.5314	7.36113e-07	134.13	0.99369	21.9725	1.76037e-06	117.09	0.99369	21.9725	3.17916e-06	111.63	0.934268	11.527	0.000773149	110.08	0.989456	19.7241	9.98525e-05	98.033	0.997053	25.2929	1.04209e-06	127.87	0.985858	18.4329	0.000942413	111.63	0.993085	21.5719	0.00155293	78.903
O54931	995	O54931	O54931	PALM2-AKAP2 fusion protein	Pakap	sp|O54931|AKAP2_MOUSE PALM2-AKAP2 fusion protein OS=Mus musculus OX=10090 GN=Pakap PE=1 SV=4	0.678495	0.0604593	6.54508	1.97307e-33	126.88	113.47	79.559	0.387263	1.6847	3.55274e-08	84.097	0.470848	2.68803	3.33873e-12	98.236	0.431707	2.71073	1.79381e-08	87.772	0.595994	4.73963	1.97307e-33	126.88	0.395979	2.24294	4.31566e-08	82.503	0.645176	6.03813	3.91514e-17	101.74	0.524139	3.74937	1.71753e-17	107.6	0.326331	0	1.40661e-05	65.899	0.416871	2.276	1.89466e-06	77.149
O54940	114	O54940	O54940	BCL2/adenovirus E1B 19 kDa protein-interacting protein 2	Bnip2	sp|O54940|BNIP2_MOUSE BCL2/adenovirus E1B 19 kDa protein-interacting protein 2 OS=Mus musculus OX=10090 GN=Bnip2 PE=1 SV=2	0.999836	1.19426e-05	37.9175	3.32016e-13	138.28	119.07	138.28					0.96278	14.2025	2.32377e-12	125.77	0.999836	37.9175	3.32016e-13	138.28	0.969165	15.1266	0.000198103	79.172	0.753337	6.92107	0.000277807	75.646	0.936262	12.7122	0.00111927	68.978	0.930686	11.6608	0.000123692	83.245	0.49552	2.05843	0.00159742	53.779
O54988	189	O54988	O54988	STE20-like serine/threonine-protein kinase	Slk	sp|O54988|SLK_MOUSE STE20-like serine/threonine-protein kinase OS=Mus musculus OX=10090 GN=Slk PE=1 SV=2	0.388761	0.178972	2.58265	0.00163484	42.347	35.071	42.347									0.388761	2.58265	0.00163484	42.347
O54988	539	O54988	O54988	STE20-like serine/threonine-protein kinase	Slk	sp|O54988|SLK_MOUSE STE20-like serine/threonine-protein kinase OS=Mus musculus OX=10090 GN=Slk PE=1 SV=2	0.236297	0.239051	0	0.00071607	53.553	44.734	53.553									0.236297	0	0.00071607	53.553	0	0		#NUM!
O54988	542	O54988	O54988	STE20-like serine/threonine-protein kinase	Slk	sp|O54988|SLK_MOUSE STE20-like serine/threonine-protein kinase OS=Mus musculus OX=10090 GN=Slk PE=1 SV=2	0.401813	0.172524	0	6.91072e-24	117.54	103.38	117.54					0.343424	0	1.017e-05	78.678	0.236297	0	0.00071607	53.553	0.401813	0	6.91072e-24	117.54									0.313188	0	0.000100435	64.315
O54988	543	O54988	O54988	STE20-like serine/threonine-protein kinase	Slk	sp|O54988|SLK_MOUSE STE20-like serine/threonine-protein kinase OS=Mus musculus OX=10090 GN=Slk PE=1 SV=2	0.401813	0.172616	0	6.91072e-24	117.54	103.38	117.54					0.343424	0	1.017e-05	78.678	0.236297	0	0.00071607	53.553	0.401813	0	6.91072e-24	117.54									0.313188	0	0.000100435	64.315
O55022	181	O55022	O55022	Membrane-associated progesterone receptor component 1	Pgrmc1	sp|O55022|PGRC1_MOUSE Membrane-associated progesterone receptor component 1 OS=Mus musculus OX=10090 GN=Pgrmc1 PE=1 SV=4	0.999955	3.2377e-06	43.6855	0	369.88	312.36	335.4	0.996496	24.6125	6.20451e-260	303.05	0.996707	24.811	0	316.25	0.999716	35.4865	0	344.14	0.988902	19.4994	0	344.85	0.99205	20.971	1.90711e-236	275.91	0.999682	34.9691	0	340.19	0.999955	43.6855	0	335.4	0.989951	19.9838	6.63764e-285	301.04	0.970603	15.1978	3.29501e-260	292.35
O55028	31	O55028	O55028	Branched-chain alpha-ketoacid dehydrogenase kinase	Bckdk	sp|O55028|BCKD_MOUSE Branched-chain alpha-ketoacid dehydrogenase kinase OS=Mus musculus OX=10090 GN=Bckdk PE=1 SV=1	0.467258	0.145217	0	3.97303e-05	93.494	67.511	82.908	0.379452	0	0.000268083	83.499	0.384558	0	0.000494248	73.887					0.45778	0	3.97303e-05	93.494					0.467258	0	0.000284361	82.908	0	0		#NUM!	0	0		#NUM!	0.349287	0	0.00188089	56.599
O55098	13	O55098	O55098	Serine/threonine-protein kinase 10	Stk10	sp|O55098|STK10_MOUSE Serine/threonine-protein kinase 10 OS=Mus musculus OX=10090 GN=Stk10 PE=1 SV=2	0.829355	0.0267456	6.86646	0.0022122	84.507	46.78	84.507
O55106	245	O55106	O55106	Striatin	Strn	sp|O55106|STRN_MOUSE Striatin OS=Mus musculus OX=10090 GN=Strn PE=1 SV=2	0.999766	1.88015e-05	36.6594	4.69234e-36	138.71	120.01	138.71					0.894121	10.5742	2.23955e-22	114.91	0.792418	6.303	7.02755e-08	82.089					0.793068	6.69238	1.84927e-08	89.039	0.984075	18.724	4.25809e-29	129.57	0.985389	20.7775	2.61262e-08	88.014	0.934088	14.1353	1.41626e-11	92.632	0.978526	17.9193	1.08763e-11	94.721
O55131	333	O55131	O55131	Septin-7	Septin7	sp|O55131|SEPT7_MOUSE Septin-7 OS=Mus musculus OX=10090 GN=Septin7 PE=1 SV=1	0.905272	0.013695	9.80301	0.000407385	77.391	65.435	61.102									0.727862	4.2726	0.000407385	77.391									0.679169	3.25701	0.0129834	53.554
O55131	422	O55131	O55131	Septin-7	Septin7	sp|O55131|SEPT7_MOUSE Septin-7 OS=Mus musculus OX=10090 GN=Septin7 PE=1 SV=1	0.368402	0.187123	0	5.32104e-05	87.932	77.454	87.932																									0.333333	0	0.000179132	79.81
O55131	423	O55131	O55131	Septin-7	Septin7	sp|O55131|SEPT7_MOUSE Septin-7 OS=Mus musculus OX=10090 GN=Septin7 PE=1 SV=1	0.463633	0.146477	1.84067	5.32104e-05	87.932	77.454	66.436													0.397854	0	0.0106923	58.487									0.333333	0	0.000179132	79.81	0.463633	1.84067	0.000628203	66.436
O55143	663	O55143	O55143	Sarcoplasmic/endoplasmic reticulum calcium ATPase 2	Atp2a2	sp|O55143|AT2A2_MOUSE Sarcoplasmic/endoplasmic reticulum calcium ATPase 2 OS=Mus musculus OX=10090 GN=Atp2a2 PE=1 SV=2	0.998845	9.69418e-05	29.3717	2.81129e-17	135.38	120.13	124.35	0.944953	12.3588	0.000213313	84.107	0.995068	23.0504	2.81129e-17	135.38	0.997878	26.7272	5.19885e-12	121.82					0.842416	8.05032	0.000135968	97.271	0.990993	20.4151	0.000520028	72.585	0.998845	29.3717	1.00231e-12	124.35					0.982228	17.4413	0.000630331	75.358
O55201	664	O55201	O55201	Transcription elongation factor SPT5	Supt5h	sp|O55201|SPT5H_MOUSE Transcription elongation factor SPT5 OS=Mus musculus OX=10090 GN=Supt5h PE=1 SV=1	0.952356	0.00598291	13.0879	6.65307e-07	104.26	83.225	77.468	0.687926	5.20619	0.0308789	40.693	0.690495	3.52411	0.00198326	72.731					0.952356	13.0879	0.000695299	77.468	0.914563	10.298	7.91414e-07	104.26	0.89257	9.60424	6.65307e-07	103.13	0.816078	6.48912	0.00277228	92.264
O70194	528	O70194	O70194	Eukaryotic translation initiation factor 3 subunit D	Eif3d	sp|O70194|EIF3D_MOUSE Eukaryotic translation initiation factor 3 subunit D OS=Mus musculus OX=10090 GN=Eif3d PE=1 SV=2	0.677342	0.0606924	3.43425	6.06764e-05	54.514	52.892	54.514																					0.573269	0	6.06764e-05	49.517									0	0		#NUM!
O70194	529	O70194	O70194	Eukaryotic translation initiation factor 3 subunit D	Eif3d	sp|O70194|EIF3D_MOUSE Eukaryotic translation initiation factor 3 subunit D OS=Mus musculus OX=10090 GN=Eif3d PE=1 SV=2	0.904883	0.0137272	9.41141	6.06764e-05	54.514	52.892	54.514																					0.772028	2.9219	6.06764e-05	49.517									0	0		#NUM!
O70251	106	O70251	O70251	Elongation factor 1-beta	Eef1b	sp|O70251|EF1B_MOUSE Elongation factor 1-beta OS=Mus musculus OX=10090 GN=Eef1b PE=1 SV=5	0.999811	1.4682e-05	37.3123	0	356.05	345.79	140.78	0.996336	24.3655	2.85e-201	219.34	0.999293	31.5239	2.29326e-292	261.45	0.99862	28.5976	0	348.33	0.996415	24.7958	9.28837e-96	165.01	0.999067	30.2993	0	297.1	0.998588	28.5171	0	303.63	0.998574	28.4515	0	315.67	0.997733	26.5736	1.1935e-95	162.34	0.990021	19.9779	4.96816e-254	241.75
O70279	295	O70279	O70279	Splicing factor ESS-2 homolog	Ess2	sp|O70279|ESS2_MOUSE Splicing factor ESS-2 homolog OS=Mus musculus OX=10090 GN=Ess2 PE=1 SV=2	1	0	24.9571	0.0051776	70.942	40.756	45.158									1	47.0528	0.0051776	70.942
O70305	741	O70305	O70305	Ataxin-2	Atxn2	sp|O70305|ATX2_MOUSE Ataxin-2 OS=Mus musculus OX=10090 GN=Atxn2 PE=1 SV=1	0.654372	0.067783	5.6425	0.00180573	74.962	47.48	51.727																	0.561862	3.42952	0.0387602	44.024	0.620761	5.22873	0.0138153	58.274	0.500436	3.32868	0.0441091	41.598	0	0		#NUM!
O70305	653	O70305	O70305	Ataxin-2	Atxn2	sp|O70305|ATX2_MOUSE Ataxin-2 OS=Mus musculus OX=10090 GN=Atxn2 PE=1 SV=1	0.9504	0.00638108	14.8202	2.29075e-05	67.832	58.549	67.832	0.571719	5.4101	0.00130562	46.862	0.9504	14.8202	2.29075e-05	67.832	0.710101	8.57607	0.00118696	47.38	0.855308	9.69197	0.000145957	58.08	0.443356	4.53474	0.00293011	40.756	0.723531	8.21663	5.76995e-05	61.37	0.277783	2.42791	0.00115468	47.52					0	0		#NUM!
O70305	435	O70305	O70305	Ataxin-2	Atxn2	sp|O70305|ATX2_MOUSE Ataxin-2 OS=Mus musculus OX=10090 GN=Atxn2 PE=1 SV=1	0.946858	0.00679867	14.8848	7.76896e-06	87.208	59.244	48.852	0	0		#NUM!	0.549046	3.23987	0.000111088	69.72					0.911054	12.4293	7.76896e-06	87.208									0.839765	8.70465	0.000200644	63.63					0	0		#NUM!
O70310	69	O70310	O70310	Glycylpeptide N-tetradecanoyltransferase 1	Nmt1	sp|O70310|NMT1_MOUSE Glycylpeptide N-tetradecanoyltransferase 1 OS=Mus musculus OX=10090 GN=Nmt1 PE=1 SV=1	0.999826	1.33373e-05	40.6074	0.0065252	68.893	44.618	68.893	0.997826	29.6289	0.0125502	59.426	0.975709	19.0491	0.0738317	40.727	0.959395	16.7444	0.0570889	43.77	0.999175	33.8429	0.0332657	48.741	0	0		#NUM!	0.999826	40.6074	0.0065252	68.893	0.998164	30.3638	0.0213579	51.762	0.976437	19.1843	0.0305844	49.3	0.974697	18.8673	0.0738317	40.727
O70310	47	O70310	O70310	Glycylpeptide N-tetradecanoyltransferase 1	Nmt1	sp|O70310|NMT1_MOUSE Glycylpeptide N-tetradecanoyltransferase 1 OS=Mus musculus OX=10090 GN=Nmt1 PE=1 SV=1	0.999983	1.13978e-06	48.1961	2.04006e-17	151.66	131.04	151.66					0.994947	23.2735	0.000216324	105.03	0.997185	25.9968	0.000396486	83.243	0.979658	16.8344	8.67151e-05	92.039	0.996589	26.068	0.000207492	88.101	0.994454	22.5498	0.000272942	99.991	0.999983	48.1961	2.04006e-17	151.66	0.763709	5.35791	0.00157077	76.073
O70318	38	O70318	O70318	Band 4.1-like protein 2	Epb41l2	sp|O70318|E41L2_MOUSE Band 4.1-like protein 2 OS=Mus musculus OX=10090 GN=Epb41l2 PE=1 SV=2	0.999993	3.80148e-07	51.4834	0	342.14	322.37	250.66	0.999367	32.0767	9.90534e-249	271.48	0.999981	48.8185	1.70577e-248	269.96	0.998195	27.4336	8.19473e-250	273.42	0.999362	33.2294	0	313.68	0.999134	31.0644	9.27893e-193	236.39	0.999481	34.0886	0	337.16	0.998585	28.485	0	342.14	0.999993	51.4834	6.94637e-210	250.66	0.999778	36.7897	0	322.87
O70318	536	O70318	O70318	Band 4.1-like protein 2	Epb41l2	sp|O70318|E41L2_MOUSE Band 4.1-like protein 2 OS=Mus musculus OX=10090 GN=Epb41l2 PE=1 SV=2	0.597024	0.0824091	2.15275	0.000361653	74.062	45.249	74.062																									0.597024	2.15275	0.000361653	74.062
O70318	201	O70318	O70318	Band 4.1-like protein 2	Epb41l2	sp|O70318|E41L2_MOUSE Band 4.1-like protein 2 OS=Mus musculus OX=10090 GN=Epb41l2 PE=1 SV=2	0.999998	9.18839e-08	56.3979	5.50416e-37	162.82	123.82	162.82	0.955076	14.8138	0.00262405	51.234	0.998776	31.3015	0.000173061	81.157	0.999998	56.3979	5.50416e-37	162.82	0	0		#NUM!	0.985753	21.4108	0.00797707	44.089	0.999486	34.7599	0.000611203	77.031	0.999995	54.907	0.00028284	106.28	0.991702	21.6532	9.86639e-09	102.94	0.965305	16.5667	0.000620598	66.644
O70318	86	O70318	O70318	Band 4.1-like protein 2	Epb41l2	sp|O70318|E41L2_MOUSE Band 4.1-like protein 2 OS=Mus musculus OX=10090 GN=Epb41l2 PE=1 SV=2	0.996733	0.000346356	24.8449	2.12821e-50	210.95	155.55	210.95	0.986132	18.5192	2.53656e-39	209.77	0.987637	19.0247	2.08726e-07	154.29	0.985028	18.1818	0.00153387	139.43	0.987422	18.9489	5.41514e-06	136.84	0.985164	18.2218	3.95781e-06	141.08	0.987422	18.9489	0.000377938	162.1	0.996733	24.8449	2.12821e-50	210.95	0.985028	18.1818	3.85431e-21	184.58	0.980522	17.0191	2.49549e-05	117.7
O70318	395	O70318	O70318	Band 4.1-like protein 2	Epb41l2	sp|O70318|E41L2_MOUSE Band 4.1-like protein 2 OS=Mus musculus OX=10090 GN=Epb41l2 PE=1 SV=2	0.925438	0.0101951	10.9386	4.57169e-30	133.61	114.5	133.61	0	0		#NUM!	0.788796	5.95379	1.59869e-05	69.845	0.852878	7.63211	1.19972e-07	86.32					0	0		#NUM!	0.767204	5.17934	3.32406e-10	99.536	0.919798	10.6109	1.09658e-09	96.44	0.647751	3.18546	3.70816e-05	66.886	0.718974	4.1906	0.00240109	44.648
O70326	76	O70326	O70326	Gremlin-1	Grem1	sp|O70326|GREM1_MOUSE Gremlin-1 OS=Mus musculus OX=10090 GN=Grem1 PE=2 SV=1	0.461115	0.148006	0	1.64251e-06	75.226	45.756	75.226	0.461115	0	1.64251e-06	75.226																									0.355463	0	0.0106058	40.756
O70326	77	O70326	O70326	Gremlin-1	Grem1	sp|O70326|GREM1_MOUSE Gremlin-1 OS=Mus musculus OX=10090 GN=Grem1 PE=2 SV=1	0.753468	0.0425751	5.03108	1.35315e-23	123.2	108.94	102.27	0.461115	0	1.64251e-06	75.226	0.630201	2.37714	1.35315e-23	123.2	0.753468	5.03108	7.78671e-14	102.27	0.546801	1.76549	1.33201e-08	90.468					0.578399	1.86149	6.05425e-08	80.847	0.585493	1.93642	2.60829e-10	93.966	0.355463	0	0.0106058	40.756	0.571442	1.76549	8.24382e-05	58.877
O70374	24	O70374	O70374	Protein CBFA2T2	Cbfa2t2	sp|O70374|MTG8R_MOUSE Protein CBFA2T2 OS=Mus musculus OX=10090 GN=Cbfa2t2 PE=1 SV=3	1	0	30.8052	0.00394923	67.115	47.853	51.546					0	0		#NUM!	1	32.8863	0.00394923	67.115	1	30.8052	0.0162258	51.546
O70374	255	O70374	O70374	Protein CBFA2T2	Cbfa2t2	sp|O70374|MTG8R_MOUSE Protein CBFA2T2 OS=Mus musculus OX=10090 GN=Cbfa2t2 PE=1 SV=3	0.993515	0.00071556	21.8525	0.00320444	93.561	68.723	93.561	0.5	0	0.00613504	58.981	0.784643	5.61513	0.0123464	64.103	0.993515	21.8525	0.00320444	93.561	0.926541	11.0082	0.0605375	54.259					0.852473	7.61809	0.024858	53.237	0.988369	19.2929	0.024858	53.237	0.911327	10.1188	0.0174962	59.426
O70400	90	O70400	O70400	PDZ and LIM domain protein 1	Pdlim1	sp|O70400|PDLI1_MOUSE PDZ and LIM domain protein 1 OS=Mus musculus OX=10090 GN=Pdlim1 PE=1 SV=4	0.960388	0.00495955	14.9051	0.0022548	52.254	48.65	52.254
O70400	144	O70400	O70400	PDZ and LIM domain protein 1	Pdlim1	sp|O70400|PDLI1_MOUSE PDZ and LIM domain protein 1 OS=Mus musculus OX=10090 GN=Pdlim1 PE=1 SV=4	0.795665	0.0343147	6.45546	2.16409e-43	136.48	126.42	136.48	0.231239	0	1.16283e-06	80.847	0.410994	0	2.75601e-11	94.721					0.243762	0	3.10255e-05	65.155	0.380582	0	4.64704e-08	89.129	0.339032	0	6.37093e-08	88.242	0.43394	5.13712	5.08977e-05	65.736	0.204384	0	3.71838e-05	62.302	0.166191	0	5.41555e-05	59.426
O70400	150	O70400	O70400	PDZ and LIM domain protein 1	Pdlim1	sp|O70400|PDLI1_MOUSE PDZ and LIM domain protein 1 OS=Mus musculus OX=10090 GN=Pdlim1 PE=1 SV=4	0.166191	0.252575	0	2.72892e-05	66.886	56.179	59.426									0.144519	0	2.72892e-05	66.886																					0.166191	0	5.41555e-05	59.426
O70400	151	O70400	O70400	PDZ and LIM domain protein 1	Pdlim1	sp|O70400|PDLI1_MOUSE PDZ and LIM domain protein 1 OS=Mus musculus OX=10090 GN=Pdlim1 PE=1 SV=4	0.166191	0.252682	0	2.72892e-05	66.886	56.179	59.426									0.144519	0	2.72892e-05	66.886																					0.166191	0	5.41555e-05	59.426
O70405	555	O70405	O70405	Serine/threonine-protein kinase ULK1	Ulk1	sp|O70405|ULK1_MOUSE Serine/threonine-protein kinase ULK1 OS=Mus musculus OX=10090 GN=Ulk1 PE=1 SV=1	0.996477	0.000377978	24.5149	2.37486e-07	103.1	97.379	74.793					0.937576	11.7665	2.37486e-07	103.1	0.996477	24.5149	0.000545335	74.793	0.983726	17.8138	0.000796568	69.148					0.898831	9.48632	0.00491076	47.68
O70405	622	O70405	O70405	Serine/threonine-protein kinase ULK1	Ulk1	sp|O70405|ULK1_MOUSE Serine/threonine-protein kinase ULK1 OS=Mus musculus OX=10090 GN=Ulk1 PE=1 SV=1	0.688702	0.0576931	3.46061	8.27639e-05	91.307	80.477	62.14	0.677483	3.2288	0.00814646	67.997	0.683415	3.34242	0.000398033	83.204	0.684258	3.36016	8.27639e-05	91.307	0.688702	3.46061	0.0145391	62.14	0.677688	3.22927	0.00908039	66.708	0.681372	3.30161	0.00675349	69.92
O70435	250	O70435	O70435	Proteasome subunit alpha type-3	Psma3	sp|O70435|PSA3_MOUSE Proteasome subunit alpha type-3 OS=Mus musculus OX=10090 GN=Psma3 PE=1 SV=3	1	1.33809e-11	91.7038	3.02367e-133	243.86	243.86	243.86	0.999976	46.2836	5.68315e-44	167.28	0.999994	52.2182	3.43403e-53	201.95	1	65.4473	1.00984e-53	181.72	1	77.7584	3.04572e-77	209.31	0.999449	33.0273	1.51526e-08	111.64	1	91.7038	3.02367e-133	243.86	0.999992	51.1023	5.10084e-59	183.7	0.99994	42.5058	4.086e-15	122.93	0.999937	42.0475	1.16458e-52	176.04
O70472	1153	O70472	O70472	Transmembrane protein 131	Tmem131	sp|O70472|TM131_MOUSE Transmembrane protein 131 OS=Mus musculus OX=10090 GN=Tmem131 PE=2 SV=2	0.997663	0.000242759	26.3031	3.65017e-10	101.47	73.582	92.426	0.905965	9.83824	6.22882e-05	64.68	0.990717	20.2827	3.65017e-10	101.47	0.997663	26.3031	1.78477e-08	92.426					0.903501	9.71407	0.000343049	54.744	0.882255	8.74651	8.36687e-05	61.801	0.952219	12.9948	0.000160184	59.359	0.749447	4.75842	0.00026474	56.72	0.807034	6.21412	0.00328087	41.087
O70472	1864	O70472	O70472	Transmembrane protein 131	Tmem131	sp|O70472|TM131_MOUSE Transmembrane protein 131 OS=Mus musculus OX=10090 GN=Tmem131 PE=2 SV=2	0.628985	0.073806	2.3215	1.91453e-08	111.35	97.896	111.35	0.628985	2.3215	1.91453e-08	111.35	0.608745	1.92964	0.000425721	77.681																									0.575677	1.44326	0.000939572	63.869
O70472	1865	O70472	O70472	Transmembrane protein 131	Tmem131	sp|O70472|TM131_MOUSE Transmembrane protein 131 OS=Mus musculus OX=10090 GN=Tmem131 PE=2 SV=2	0.69686	0.0558824	3.61579	3.21266e-31	158.53	142.3	158.53					0.634674	3.08038	0.00173837	81.594	0.694742	3.57209	6.5309e-31	152.13	0.648063	2.74205	0.00261341	50.377	0.684411	3.36651	7.66789e-10	118.84	0.69057	3.4869	4.40387e-24	151.64	0.69686	3.61579	3.21266e-31	158.53	0.691655	3.50932	6.81773e-23	143.33
O70480	30	O70480	O70480	Vesicle-associated membrane protein 4	Vamp4	sp|O70480|VAMP4_MOUSE Vesicle-associated membrane protein 4 OS=Mus musculus OX=10090 GN=Vamp4 PE=1 SV=1	1	0	14.3192	6.57645e-84	186.02	163.3	73.783	1	29.4488	6.57645e-84	186.02	0.990586	20.2213	3.74316e-05	63.491	1	39.3116	1.16783e-70	175.12	0.999973	45.6179	4.1139e-59	162.82	1	21.8989	3.42813e-59	164.43	1	35.1895	9.84368e-24	125.05	1	31.9413	3.45972e-40	150.59	1	28.1977	1.62819e-31	140.8	1	18.7182	1.23409e-49	158.2
O70481	1601	O70481	O70481	E3 ubiquitin-protein ligase UBR1	Ubr1	sp|O70481|UBR1_MOUSE E3 ubiquitin-protein ligase UBR1 OS=Mus musculus OX=10090 GN=Ubr1 PE=1 SV=2	0.998645	0.000118898	31.4381	5.76474e-07	80.729	76.925	66.732	0.510509	4.58527	0.00145218	44.052	0.882581	11.9753	1.77422e-05	68.444	0.993315	24.4882	5.76474e-07	80.729	0.998645	31.4381	2.38472e-05	66.732					0.979848	19.2902	0.000154081	54.582	0.978938	20.161	0.000148183	54.934					0	0		#NUM!
O70492	72	O70492	O70492	Sorting nexin-3	Snx3	sp|O70492|SNX3_MOUSE Sorting nexin-3 OS=Mus musculus OX=10090 GN=Snx3 PE=1 SV=3	0.910841	0.012563	10.0928	0.000344979	118.48	89.184	118.48	0.733769	4.403	0.0124094	69.979	0.876328	8.50397	0.000344979	101.93	0.89965	9.52559	0.000582805	97.911					0	0		#NUM!	0.861212	7.92758	0.00110623	90.653					0.710875	3.90708	0.0269848	59.426
O70493	73	O70493	O70493	Sorting nexin-12	Snx12	sp|O70493|SNX12_MOUSE Sorting nexin-12 OS=Mus musculus OX=10090 GN=Snx12 PE=1 SV=1	0.931831	0.00929252	11.3575	3.39469e-15	141.22	132.04	109.89	0.736662	4.46754	2.50818e-05	98.175	0.931831	11.3575	2.30819e-06	109.89	0.869591	8.24009	2.27031e-07	118.96	0.726709	4.24735	8.4984e-06	102.33	0.742081	4.58967	2.40844e-05	98.391	0.699222	3.66369	0.000414156	80.238	0	0		#NUM!	0.716836	4.03382	8.38801e-05	90.654	0.726709	4.24735	0.000283174	84.499
O70493	2	O70493	O70493	Sorting nexin-12	Snx12	sp|O70493|SNX12_MOUSE Sorting nexin-12 OS=Mus musculus OX=10090 GN=Snx12 PE=1 SV=1	0.869706	0.0189338	8.24649	0.00128464	82.417	66.163	82.417													0.852996	7.65942	0.00149723	66.595	0.808724	6.46823	0.00583755	51.092	0.848228	7.49767	0.00462293	54.784	0.869706	8.24649	0.00128464	82.417	0.825337	6.81524	0.00190449	64.439
O70496	9	O70496	O70496	H(+)/Cl(-) exchange transporter 7	Clcn7	sp|O70496|CLCN7_MOUSE H(+)/Cl(-) exchange transporter 7 OS=Mus musculus OX=10090 GN=Clcn7 PE=1 SV=1	0.998141	0.000172251	27.2981	0.0170325	88.37	67.888	76.605									0.998141	27.2981	0.0170325	88.37	0.998141	27.2981	0.0230254	76.605
O70551	51	O70551	O70551	SRSF protein kinase 1	Srpk1	sp|O70551|SRPK1_MOUSE SRSF protein kinase 1 OS=Mus musculus OX=10090 GN=Srpk1 PE=1 SV=2	0.999985	1.02775e-06	48.572	4.12505e-201	215.98	204.89	215.98	0.994567	23.7778	4.03203e-43	125.05	0.999593	35.2687	1.17243e-11	91.418	0.998951	30.7746	1.91605e-66	149.44	0.999862	39.4205	1.34189e-133	191.5	0.956007	17.7283	3.73092e-17	85.595	0.997767	28.0248	5.7128e-54	138.36	0.98445	18.8866	3.48814e-34	113.88					0.996638	25.3706	5.5321e-96	166.25
O88271	246	O88271	O88271	Craniofacial development protein 1	Cfdp1	sp|O88271|CFDP1_MOUSE Craniofacial development protein 1 OS=Mus musculus OX=10090 GN=Cfdp1 PE=1 SV=1	0.980267	0.00226609	16.9616	3.10725e-17	109.45	100.54	109.45	0.980267	16.9616	3.10725e-17	109.45	0.954628	13.2304	8.90831e-17	105.17	0.894974	9.30515	0.000179586	53.059					0.847764	7.45759	6.59231e-06	72.644	0.90342	9.71003	3.08109e-05	64.779	0.88923	9.04594	0.000105464	57.484	0.935973	11.649	6.41635e-06	72.881	0.927314	11.0577	0.000108663	57.293
O88286	1014	O88286	O88286	Protein Wiz	Wiz	sp|O88286|WIZ_MOUSE Protein Wiz OS=Mus musculus OX=10090 GN=Wiz PE=1 SV=2	0.659343	0.0665039	5.88182	0.000508806	120.57	84.157	108.98	0.476733	1.34441	0.00138482	88.596	0.658587	5.88182	0.000508806	108.98	0.659343	5.88182	0.000508806	108.98	0.621618	5.2368	0.000776452	120.57													0.388576	1.07208	0.0842999	43.502
O88286	1015	O88286	O88286	Protein Wiz	Wiz	sp|O88286|WIZ_MOUSE Protein Wiz OS=Mus musculus OX=10090 GN=Wiz PE=1 SV=2	0.333318	0.200344	0	0.000776452	120.57	84.157	120.57													0.333318	0	0.000776452	120.57
O88286	1016	O88286	O88286	Protein Wiz	Wiz	sp|O88286|WIZ_MOUSE Protein Wiz OS=Mus musculus OX=10090 GN=Wiz PE=1 SV=2	0.333318	0.200249	0	0.000776452	120.57	84.157	120.57													0.333318	0	0.000776452	120.57
O88286	1029	O88286	O88286	Protein Wiz	Wiz	sp|O88286|WIZ_MOUSE Protein Wiz OS=Mus musculus OX=10090 GN=Wiz PE=1 SV=2	0.692556	0.0569344	3.91252	0.00908552	58.079	51.388	58.079									0.692556	3.91252	0.00908552	58.079
O88286	1179	O88286	O88286	Protein Wiz	Wiz	sp|O88286|WIZ_MOUSE Protein Wiz OS=Mus musculus OX=10090 GN=Wiz PE=1 SV=2	0.743051	0.0453637	6.83897	2.78425e-05	62.589	49.84	62.589													0.743051	6.83897	2.78425e-05	62.589													0.37653	2.93216	0.000281426	50.055	0.505825	2.84562	0.00106784	43.888
O88286	1045	O88286	O88286	Protein Wiz	Wiz	sp|O88286|WIZ_MOUSE Protein Wiz OS=Mus musculus OX=10090 GN=Wiz PE=1 SV=2	0.547927	0.0996148	2.49558	0.000911162	61.801	55.319	52.359																					0.481035	1.38647	0.000911162	49.924	0.466373	0.871377	0.0020246	61.801
O88286	1050	O88286	O88286	Protein Wiz	Wiz	sp|O88286|WIZ_MOUSE Protein Wiz OS=Mus musculus OX=10090 GN=Wiz PE=1 SV=2	0.687888	0.0577694	3.48392	1.11575e-72	188.98	177.88	172.42	0.40314	0	0.00323332	49.832	0.496073	0	4.38433e-33	148.2	0.498784	0	3.1853e-62	178.11	0.390149	0	0.000403845	65.905	0.472427	0	2.19706e-10	110.26	0.532434	0	2.61056e-26	140.2	0.687888	3.48392	5.62962e-62	172.42	0.484246	0	1.34078e-18	122.34	0.494174	0	4.96197e-26	138.49
O88379	1335	O88379	O88379	Bromodomain adjacent to zinc finger domain protein 1A	Baz1a	sp|O88379|BAZ1A_MOUSE Bromodomain adjacent to zinc finger domain protein 1A OS=Mus musculus OX=10090 GN=Baz1a PE=1 SV=3	0.273565	0.224759	0	3.08268e-05	65.775	61.705	52.909					0.247941	0	3.08268e-05	65.775					0.228985	0	0.00183531	44.5					0.273565	0	0.000233902	52.909	0.253287	0	0.00134876	45.784
O88379	1339	O88379	O88379	Bromodomain adjacent to zinc finger domain protein 1A	Baz1a	sp|O88379|BAZ1A_MOUSE Bromodomain adjacent to zinc finger domain protein 1A OS=Mus musculus OX=10090 GN=Baz1a PE=1 SV=3	0.273565	0.224856	0	3.08268e-05	65.775	61.705	52.909					0.247941	0	3.08268e-05	65.775					0.228985	0	0.00183531	44.5					0.273565	0	0.000233902	52.909	0.253287	0	0.00134876	45.784
O88379	1341	O88379	O88379	Bromodomain adjacent to zinc finger domain protein 1A	Baz1a	sp|O88379|BAZ1A_MOUSE Bromodomain adjacent to zinc finger domain protein 1A OS=Mus musculus OX=10090 GN=Baz1a PE=1 SV=3	0.247941	0.234425	0	3.08268e-05	65.775	61.705	65.775					0.247941	0	3.08268e-05	65.775					0.228985	0	0.00183531	44.5
O88448	574	O88448	O88448	Kinesin light chain 2	Klc2	sp|O88448|KLC2_MOUSE Kinesin light chain 2 OS=Mus musculus OX=10090 GN=Klc2 PE=1 SV=1	0.697115	0.0557328	3.62026	0.000272398	95.498	32.963	89.189																	0	0		#NUM!									0.697115	3.62026	0.000625011	89.189	0.677722	3.22822	0.01747	62.088
O88448	575	O88448	O88448	Kinesin light chain 2	Klc2	sp|O88448|KLC2_MOUSE Kinesin light chain 2 OS=Mus musculus OX=10090 GN=Klc2 PE=1 SV=1	0.999967	2.2699e-06	44.8314	1.89098e-06	150.18	123.73	150.18	0.999638	34.4165	4.17324e-06	121.5	0.993895	22.1164	0.000189685	117.3	0.999967	44.8314	7.54052e-05	150.18	0.999933	41.7461	0.000136616	147.78	0.993895	22.1164	0.000314192	114.97	0.995691	23.6378	0.00015107	132.39	0.99495	22.9452	1.89098e-06	128.27	0.999391	32.1489	0.00033558	113.15	0.993895	22.1164	0.00017762	128.27
O88448	539	O88448	O88448	Kinesin light chain 2	Klc2	sp|O88448|KLC2_MOUSE Kinesin light chain 2 OS=Mus musculus OX=10090 GN=Klc2 PE=1 SV=1	0.999382	4.83978e-05	32.0862	0.00577448	81.95	20.808	74.376	0.997339	25.7375	0.0233182	70.816					0.998027	27.0396	0.0370366	66.27	0.999382	32.0862	0.0170385	74.376	0.998283	27.645	0.0105273	78.516	0.997548	26.0935	0.0216395	71.451	0.997147	25.4343	0.0370366	66.27	0.987745	19.0631	0.0401926	65.224	0.998961	29.8307	0.00577448	81.95
O88466	1381	O88466	O88466	Zinc finger protein 106	Znf106	sp|O88466|ZN106_MOUSE Zinc finger protein 106 OS=Mus musculus OX=10090 GN=Znf106 PE=1 SV=3	0.626735	0.0743121	4.24939	3.76513e-08	89.946	76.854	72.033																					0.611992	2.29441	3.76513e-08	89.946					0.626735	4.24939	0.000526651	72.033
O88477	181	O88477	O88477	Insulin-like growth factor 2 mRNA-binding protein 1	Igf2bp1	sp|O88477|IF2B1_MOUSE Insulin-like growth factor 2 mRNA-binding protein 1 OS=Mus musculus OX=10090 GN=Igf2bp1 PE=1 SV=1	1	0	29.5604	2.10919e-39	149.93	146.7	72.417	1	76.3981	3.7527e-14	110.6	1	105.371	4.22009e-30	140.56	1	36.9532	8.14548e-08	88.036	1	86.755	2.48367e-23	127.94	1	78.4543	1.59042e-09	91.657	1	109.059	2.10919e-39	149.93	1	72.3678	1.12163e-13	108.32	1	86.755	3.96155e-23	125.54	1	32.6147	6.174e-23	121.94
O88487	81	O88487	O88487	Cytoplasmic dynein 1 intermediate chain 2	Dync1i2	sp|O88487|DC1I2_MOUSE Cytoplasmic dynein 1 intermediate chain 2 OS=Mus musculus OX=10090 GN=Dync1i2 PE=1 SV=1	0.525326	0.108693	2.53834	2.00685e-16	102.97	90.043	88.244	0.258271	1.65499	0.000116262	54.255	0.434007	1.15008	2.00685e-16	102.97	0.43117	1.16909	1.62841e-07	83.202	0.428067	1.16211	1.92458e-11	95.319	0.525326	2.53834	9.1947e-08	88.244	0.41787	1.17106	1.04188e-07	87.808	0.435835	1.13287	1.52706e-07	83.317	0.42342	1.16726	2.02759e-05	68.046	0.415237	1.15815	2.34747e-06	80.171
O88502	452	O88502	O88502	High affinity cAMP-specific and IBMX-insensitive 3',5'-cyclic phosphodiesterase 8A	Pde8a	sp|O88502|PDE8A_MOUSE High affinity cAMP-specific and IBMX-insensitive 3',5'-cyclic phosphodiesterase 8A OS=Mus musculus OX=10090 GN=Pde8a PE=1 SV=1	0.999757	1.9368e-05	36.1483	3.41825e-20	163.2	126.79	163.2	0.948046	12.6236	2.11371e-05	118.08	0.939448	12.0175	3.88829e-06	121.18	0.933908	12.5002	5.36336e-05	112.24	0.950886	12.8707	2.11821e-10	131.96	0.979498	16.7941	2.79926e-16	143.58	0.999741	35.8595	2.31053e-12	133.87	0.99827	27.623	8.85896e-17	150.05	0.983085	18.0879	0.000204983	109.1	0.983219	17.7166	3.77037e-05	115.1
O88502	16	O88502	O88502	High affinity cAMP-specific and IBMX-insensitive 3',5'-cyclic phosphodiesterase 8A	Pde8a	sp|O88502|PDE8A_MOUSE High affinity cAMP-specific and IBMX-insensitive 3',5'-cyclic phosphodiesterase 8A OS=Mus musculus OX=10090 GN=Pde8a PE=1 SV=1	0.404471	0.171512	0.455923	0.0013941	44.415	39.04	44.415					0	0		#NUM!	0.404471	0.455923	0.0013941	44.415	0	0		#NUM!									0	0		#NUM!
O88502	18	O88502	O88502	High affinity cAMP-specific and IBMX-insensitive 3',5'-cyclic phosphodiesterase 8A	Pde8a	sp|O88502|PDE8A_MOUSE High affinity cAMP-specific and IBMX-insensitive 3',5'-cyclic phosphodiesterase 8A OS=Mus musculus OX=10090 GN=Pde8a PE=1 SV=1	0.544603	0.101275	2.69877	3.75343e-05	61.276	54.477	61.276					0	0		#NUM!					0.53924	2.63174	0.0125409	40.81					0.544603	2.69877	3.75343e-05	61.276	0	0		#NUM!
O88532	1054	O88532	O88532	Zinc finger RNA-binding protein	Zfr	sp|O88532|ZFR_MOUSE Zinc finger RNA-binding protein OS=Mus musculus OX=10090 GN=Zfr PE=1 SV=2	1	0	85.5069	9.08111e-79	220.88	199.92	138.91	1	129.528	4.42396e-43	180.52	1	147.113	5.91083e-67	208.72	1	185.785	1.31717e-65	205.15	1	143.237	2.05902e-43	181.61	1	116.421	1.47608e-42	175.77	1	124.431	9.08111e-79	220.88	1	83.2608	8.33629e-49	184.84	1	131.111	7.18503e-49	185.92	1	36.6585	1.86302e-12	128.95
O88569	189	O88569	O88569	Heterogeneous nuclear ribonucleoproteins A2/B1	Hnrnpa2b1	sp|O88569|ROA2_MOUSE Heterogeneous nuclear ribonucleoproteins A2/B1 OS=Mus musculus OX=10090 GN=Hnrnpa2b1 PE=1 SV=2	0.991587	0.000949259	23.2742	0.00853931	63.185	41.938	54.898																													0.991587	23.2742	0.00853931	63.185
O88587	261	O88587	O88587	Catechol O-methyltransferase	Comt	sp|O88587|COMT_MOUSE Catechol O-methyltransferase OS=Mus musculus OX=10090 GN=Comt PE=1 SV=2	0.845218	0.0232066	7.60587	3.54609e-18	154.1	127.43	132.04	0.650914	3.50443	0.000124788	93.494	0.835399	7.4274	0.000166397	103.23	0.844624	7.60243	3.54609e-18	154.1	0.800318	7.527	5.46246e-06	118.73					0.658048	3.65909	0.000124352	90.759	0.782791	7.28047	6.61086e-05	108.97	0.840435	7.5285	1.05735e-08	128.35	0.825062	7.21311	9.02639e-05	92.65
O88622	195	O88622	O88622	Poly(ADP-ribose) glycohydrolase	Parg	sp|O88622|PARG_MOUSE Poly(ADP-ribose) glycohydrolase OS=Mus musculus OX=10090 GN=Parg PE=1 SV=2	0.231416	0.240832	0.728157	0.00031516	47.252	37.576	47.252
O88643	144	O88643	O88643	Serine/threonine-protein kinase PAK 1	Pak1	sp|O88643|PAK1_MOUSE Serine/threonine-protein kinase PAK 1 OS=Mus musculus OX=10090 GN=Pak1 PE=1 SV=1	0.99019	0.00112575	21.2792	2.22467e-07	84.933	76.745	81.972	0	0		#NUM!	0.954702	13.2791	0.0215465	68.846	0.99019	21.2792	0.0134782	81.972	0	0		#NUM!	0	0		#NUM!	0.947802	12.7135	0.0776678	52.591									0	0		#NUM!
O88665	279	O88665	O88665	Bromodomain-containing protein 7	Brd7	sp|O88665|BRD7_MOUSE Bromodomain-containing protein 7 OS=Mus musculus OX=10090 GN=Brd7 PE=1 SV=1	0.999199	6.72095e-05	30.9619	0.00156576	59.606	45.16	44.816									0.999199	30.9619	0.0321297	44.816													0.97729	16.3381	0.0664923	42.818
O88667;P55041	299;286	O88667	O88667	GTP-binding protein RAD;GTP-binding protein GEM	Rrad;Gem	sp|O88667|RAD_MOUSE GTP-binding protein RAD OS=Mus musculus OX=10090 GN=Rrad PE=1 SV=1;sp|P55041|GEM_MOUSE GTP-binding protein GEM OS=Mus musculus OX=10090 GN=Gem PE=1 SV=2	0.615762	0.0773692	2.38484	0.0108	40.278	33.84	40.278									0	0		#NUM!									0	0		#NUM!					0.615762	2.38484	0.0108	40.278
O88667;P55041	301;288	O88667	O88667	GTP-binding protein RAD;GTP-binding protein GEM	Rrad;Gem	sp|O88667|RAD_MOUSE GTP-binding protein RAD OS=Mus musculus OX=10090 GN=Rrad PE=1 SV=1;sp|P55041|GEM_MOUSE GTP-binding protein GEM OS=Mus musculus OX=10090 GN=Gem PE=1 SV=2	0.986227	0.00161579	18.5773	4.05081e-06	117.86	108.27	117.86					0.757451	5.24299	0.00264909	58.071	0.986227	18.5773	4.05081e-06	117.86	0.933862	11.7542	0.01317	74.077	0.735861	4.62229	0.030695	59.367	0.746857	4.77349	0.0205624	63.473					0.723586	4.52353	0.0415434	56.02
O88667	26	O88667	O88667	GTP-binding protein RAD	Rrad	sp|O88667|RAD_MOUSE GTP-binding protein RAD OS=Mus musculus OX=10090 GN=Rrad PE=1 SV=1	0.742756	0.0454308	4.60501	0.00281411	54.103	41.066	54.103	0.5	0	0.0086178	40.515	0.644936	2.5921	0.00655107	43.326					0.742756	4.60501	0.00281411	54.103					0.646736	2.62628	0.0217018	40.363	0.639578	2.49083	0.00942038	40.047
O88667	39	O88667	O88667	GTP-binding protein RAD	Rrad	sp|O88667|RAD_MOUSE GTP-binding protein RAD OS=Mus musculus OX=10090 GN=Rrad PE=1 SV=1	0.994847	0.000561919	28.532	3.1014e-07	83.054	74.965	60.381	0.994847	28.532	5.87054e-05	60.381	0.990608	25.8556	3.99388e-05	69.551	0.902788	15.3535	0.000983109	44.814	0.977031	21.7523	3.36436e-07	82.336	0.980572	22.7055	2.47912e-05	71.903	0.981423	22.9205	1.30462e-05	77.493	0.987516	24.4232	3.62337e-05	70.501	0.973579	21.129	3.52061e-07	81.91	0.985994	24.1674	3.1014e-07	83.054
O88685	12	O88685	O88685	26S proteasome regulatory subunit 6A	Psmc3	sp|O88685|PRS6A_MOUSE 26S proteasome regulatory subunit 6A OS=Mus musculus OX=10090 GN=Psmc3 PE=1 SV=2	0.97918	0.00240354	17.3549	3.76093e-51	166.91	139.57	85.387	0.864427	8.29077	8.28547e-14	113.88	0.851566	7.67694	4.05335e-10	102.89	0.801072	6.18428	0.000308364	72.583	0.877888	11.1079	3.76093e-51	166.91	0.94845	14.251	2.0676e-10	106.43	0.835878	7.12574	5.662e-14	114.88	0.97918	17.3549	8.23164e-16	122.44	0.945778	12.4572	1.89483e-19	127.97	0.822666	6.73934	4.06157e-26	132.62
O88738	4047	O88738	O88738	Baculoviral IAP repeat-containing protein 6	Birc6	sp|O88738|BIRC6_MOUSE Dual E2 ubiquitin-conjugating enzyme/E3 ubiquitin-protein ligase BIRC6 OS=Mus musculus OX=10090 GN=Birc6 PE=1 SV=2	0.968777	0.00381768	15.0042	6.33132e-57	195.78	170.73	145.88	0.870936	8.72638	9.50204e-10	119.31	0.837255	7.93626	0.00121663	65.924	0.968777	15.0042	7.12585e-23	145.88	0.880707	10.1211	6.33132e-57	195.78	0.906778	9.94677	1.85584e-42	174.02	0.547734	0.90389	5.78203e-38	165.74	0.79967	6.48522	8.06513e-23	145.05	0.892924	9.39317	1.82404e-16	132.79	0.883885	8.94233	4.69213e-12	124.35
O88746	183	O88746	O88746	Target of Myb1 membrane trafficking protein	Tom1	sp|O88746|TOM1_MOUSE Target of Myb1 membrane trafficking protein OS=Mus musculus OX=10090 GN=Tom1 PE=1 SV=1	0.169415	0.252256	0.547667	0.000429819	56.468	42.204	56.468																									0.169415	0.547667	0.000429819	56.468
O88792	285	O88792	O88792	Junctional adhesion molecule A	F11r	sp|O88792|JAM1_MOUSE Junctional adhesion molecule A OS=Mus musculus OX=10090 GN=F11r PE=1 SV=2	0.575663	0.0897315	3.28055	3.76932e-06	102.5	82.042	55.806									0.416561	2.67459	0.0708728	52.265	0.267198	0	0.0181698	48.547													0.306791	0	0.00187174	59.003	0	0		#NUM!
O88792	288	O88792	O88792	Junctional adhesion molecule A	F11r	sp|O88792|JAM1_MOUSE Junctional adhesion molecule A OS=Mus musculus OX=10090 GN=F11r PE=1 SV=2	0.901531	0.014313	11.1559	4.60686e-56	190.44	154.11	190.44													0.267198	0	0.0181698	48.547	0.400924	1.42107	0.00243504	55.589	0.792807	7.37642	3.88845e-38	162.29	0.901531	11.1559	4.60686e-56	190.44	0.401772	0	7.98992e-07	107.61
O88852	2	O88852	O88852	Testis-specific Y-encoded-like protein 1	Tspyl1	sp|O88852|TSYL1_MOUSE Testis-specific Y-encoded-like protein 1 OS=Mus musculus OX=10090 GN=Tspyl1 PE=2 SV=1	0.499504	0.126127	0	9.4856e-06	100.23	75.803	100.23									0.499504	0	9.4856e-06	100.23	0.497536	0	0.000948864	66.673					0.488512	0	0.00550886	46.378	0.492084	0	0.000521709	77.222	0.494475	0	0.00133856	60.918	0.474307	0	0.00124578	62.055
O88852	3	O88852	O88852	Testis-specific Y-encoded-like protein 1	Tspyl1	sp|O88852|TSYL1_MOUSE Testis-specific Y-encoded-like protein 1 OS=Mus musculus OX=10090 GN=Tspyl1 PE=2 SV=1	0.635245	0.0717914	2.63242	9.4856e-06	100.23	75.803	90.754					0.635245	2.63242	5.8331e-05	90.754	0.499504	0	9.4856e-06	100.23	0.497536	0	0.000948864	66.673					0.488512	0	0.00550886	46.378	0.492084	0	0.000521709	77.222	0.494475	0	0.00133856	60.918	0.474307	0	0.00124578	62.055
O88907	503	O88907	O88907	E3 SUMO-protein ligase PIAS1	Pias1	sp|O88907|PIAS1_MOUSE E3 SUMO-protein ligase PIAS1 OS=Mus musculus OX=10090 GN=Pias1 PE=1 SV=2	0.985198	0.00176998	18.577	3.95717e-14	138.28	117.05	67.102	0.813395	6.42183	0.00162984	67.095	0.951156	12.8999	3.95717e-14	138.28	0.959533	13.7509	3.45316e-06	107.75	0.930235	11.5738	5.44417e-06	104.88	0.812469	6.42183	2.72497e-05	96.666	0.776369	5.55889	0.000216835	85.362	0.812583	6.41582	7.04577e-06	102.58	0.664007	3.72546	0.0052053	46.663	0.789771	5.75493	0.000103896	89.468
O88939	331	O88939	O88939	Zinc finger and BTB domain-containing protein 7A	Zbtb7a	sp|O88939|ZBT7A_MOUSE Zinc finger and BTB domain-containing protein 7A OS=Mus musculus OX=10090 GN=Zbtb7a PE=1 SV=2	0.995798	0.000478603	25.7106	4.4345e-23	125.11	107.77	125.11													0.899269	13.346	2.57427e-06	75.896	0.70382	7.28311	5.81465e-05	61.801	0.995798	25.7106	4.4345e-23	125.11	0.883098	12.6994	0.000215022	55.994					0	0		#NUM!
O89032	1029	O89032	O89032	SH3 and PX domain-containing protein 2A	Sh3pxd2a	sp|O89032|SPD2A_MOUSE SH3 and PX domain-containing protein 2A OS=Mus musculus OX=10090 GN=Sh3pxd2a PE=1 SV=2	0.999976	1.50835e-06	46.4093	2.14967e-48	185.12	166.39	142.54	0.99663	24.9142	1.29805e-11	124.09	0.9881	19.2028	0.000190519	92.575	0.999477	32.8529	3.34784e-16	135.72	0.994668	22.8304	3.16641e-12	130.06	0.983996	17.9677	1.76785e-16	138.73	0.999953	43.2821	3.58388e-42	176.4	0.999885	39.4218	2.94062e-22	142.45	0.999865	38.7168	2.14967e-48	185.12	0.980497	17.1362	6.16975e-08	111.43
O89032	764	O89032	O89032	SH3 and PX domain-containing protein 2A	Sh3pxd2a	sp|O89032|SPD2A_MOUSE SH3 and PX domain-containing protein 2A OS=Mus musculus OX=10090 GN=Sh3pxd2a PE=1 SV=2	0.998726	0.0001118	29.0809	1.37535e-12	122.01	104.86	122.01	0.680832	5.24947	0.00933478	55.589	0.977504	17.1685	0.00221878	53.453	0.918902	11.5384	0.00145548	58.997	0.998726	29.0809	1.37535e-12	122.01	0.946282	14.318	0.000657514	69.979	0.801142	9.45837	0.00698161	42.716
O89032	419	O89032	O89032	SH3 and PX domain-containing protein 2A	Sh3pxd2a	sp|O89032|SPD2A_MOUSE SH3 and PX domain-containing protein 2A OS=Mus musculus OX=10090 GN=Sh3pxd2a PE=1 SV=2	0.846936	0.0230646	7.42977	0.00084918	85.29	62.604	85.29
O89032	420	O89032	O89032	SH3 and PX domain-containing protein 2A	Sh3pxd2a	sp|O89032|SPD2A_MOUSE SH3 and PX domain-containing protein 2A OS=Mus musculus OX=10090 GN=Sh3pxd2a PE=1 SV=2	0.997447	0.000269701	25.9182	0.000181816	141.91	104.57	115.78	0.997447	25.9182	0.000304619	115.78	0.996923	25.1057	0.000349484	111.61	0.945011	12.3516	0.000237255	121.5	0.853574	7.65622	0.000279156	141.91	0.925467	10.9401	0.000845614	85.355	0.99626	24.2548	0.000329804	110.53	0.93971	11.9275	0.000329804	110.53	0.945011	12.3516	0.000181816	134.68	0.707628	3.83869	0.000210847	99.973
O89032	792	O89032	O89032	SH3 and PX domain-containing protein 2A	Sh3pxd2a	sp|O89032|SPD2A_MOUSE SH3 and PX domain-containing protein 2A OS=Mus musculus OX=10090 GN=Sh3pxd2a PE=1 SV=2	0.608231	0.0797838	2.78422	1.06089e-11	95.212	83.912	69.782	0.391973	0	6.20155e-05	60.278	0.608231	2.78422	1.37113e-05	69.782	0.400954	0	0.000178882	53.679					0.367518	0	0.00114388	46.145	0.463941	0	1.06089e-11	95.212	0.482634	0	5.73465e-06	74.214	0.412198	0	6.49726e-08	83.216	0.393662	0	0.000142488	55.734
O89032	794	O89032	O89032	SH3 and PX domain-containing protein 2A	Sh3pxd2a	sp|O89032|SPD2A_MOUSE SH3 and PX domain-containing protein 2A OS=Mus musculus OX=10090 GN=Sh3pxd2a PE=1 SV=2	0.564218	0.092739	2.24873	1.06089e-11	95.212	83.912	90.397	0.391973	0	6.20155e-05	60.278					0.400954	0	0.000178882	53.679					0.367518	0	0.00114388	46.145	0.463941	0	1.06089e-11	95.212	0.482634	0	5.73465e-06	74.214	0.412198	0	6.49726e-08	83.216	0.393662	0	0.000142488	55.734
O89032	1047	O89032	O89032	SH3 and PX domain-containing protein 2A	Sh3pxd2a	sp|O89032|SPD2A_MOUSE SH3 and PX domain-containing protein 2A OS=Mus musculus OX=10090 GN=Sh3pxd2a PE=1 SV=2	1	0	16.7352	0.000503531	76.85	65.795	52.862	1	23.5372	0.000503531	76.85	1	12.7108	0.00291731	52.887	1	20.6479	0.00408769	50.053	1	18.7182	0.00106791	65.225	0	0		#NUM!	1	29.6326	0.00191823	58.159									1	16.7352	0.0137208	40.085
O89032	993	O89032	O89032	SH3 and PX domain-containing protein 2A	Sh3pxd2a	sp|O89032|SPD2A_MOUSE SH3 and PX domain-containing protein 2A OS=Mus musculus OX=10090 GN=Sh3pxd2a PE=1 SV=2	0.985445	0.00174253	18.7958	0.000274945	105.19	81.965	102.65	0.933777	12.3272	0.00643271	68.972	0.985445	18.7958	0.000567619	102.65	0.715284	4.18415	0.000657704	85.006	0.946074	12.9805	0.000274945	89.911	0.951877	14.0684	0.00360178	76.073	0.953645	13.3604	0.000582004	85.976	0.865192	10.7496	0.000424791	105.19	0.960776	16.2443	0.000622517	85.457	0.898736	11.5962	0.00314464	72.321
O89032	812	O89032	O89032	SH3 and PX domain-containing protein 2A	Sh3pxd2a	sp|O89032|SPD2A_MOUSE SH3 and PX domain-containing protein 2A OS=Mus musculus OX=10090 GN=Sh3pxd2a PE=1 SV=2	0.999296	5.76381e-05	33.292	2.88242e-05	77.894	67.935	77.894	0.919999	14.4102	0.00051204	53.278	0.950078	16.844	0.000280593	58.49	0.999296	33.292	2.88242e-05	77.894					0.978239	20.2842	0.000638101	50.945	0.985818	21.0754	0.000235187	59.512	0.996979	27.536	0.000290269	58.272
O89032	592	O89032	O89032	SH3 and PX domain-containing protein 2A	Sh3pxd2a	sp|O89032|SPD2A_MOUSE SH3 and PX domain-containing protein 2A OS=Mus musculus OX=10090 GN=Sh3pxd2a PE=1 SV=2	0.999999	1.98297e-08	65.0633	4.0973e-39	204.01	54.844	195.94	0.999982	47.4871	1.09005e-06	148.13	0.999999	65.0633	4.0973e-39	195.94	0.999995	53.1903	1.22226e-07	156.52	0.999998	56.4467	3.44334e-29	194.06	0.999961	44.8011	3.62454e-06	116.81	0.99999	50.5382	3.27388e-07	151.68	0.999993	54.4153	2.34446e-06	142.29	0.986243	20.4372	0.00144133	66.989	0.999987	50.3643	1.44129e-07	155.47
O89110	188	O89110	O89110	Caspase-8;Caspase-8 subunit p18;Caspase-8 subunit p10	Casp8	sp|O89110|CASP8_MOUSE Caspase-8 OS=Mus musculus OX=10090 GN=Casp8 PE=1 SV=1	1	1.82874e-09	72.0176	2.68161e-95	200	181.76	196.06	0.999986	48.5033	1.35471e-58	165.48	0.999997	55.0851	3.28771e-09	99.396	1	72.0176	6.48454e-95	196.06	0.999995	53.1298	5.57834e-59	169.57	0.999994	51.996	6.57693e-70	173.35	0.999983	48.4318	2.81068e-49	160.26	0.999991	50.4288	3.80327e-39	148.3	0.999996	53.6747	1.38735e-58	165.31	0.999968	45.0298	2.80067e-29	136.49
P05480	17	P05480	P05480	Proto-oncogene tyrosine-protein kinase Src	Src	sp|P05480|SRC_MOUSE Proto-oncogene tyrosine-protein kinase Src OS=Mus musculus OX=10090 GN=Src PE=1 SV=5	0.985964	0.00165525	18.5156	1.64691e-41	129.5	99.912	108.94	0.962081	15.3806	2.63482e-22	103.41	0.882595	9.06521	9.13737e-16	76.425	0.985964	18.5156	8.96089e-35	129.5	0.852374	9.44425	1.9765e-15	70.178	0.754129	8.58605	3.45168e-11	69.395	0.878913	8.96402	1.71081e-05	61.394	0.94665	14.3072	3.88363e-34	106.74	0.949056	14.3093	8.65402e-13	93.411	0.726766	8.14918	9.34859e-06	66.027
P05627;P15066	73;100	P05627;P15066	P05627	Transcription factor Jun;Transcription factor JunD	Jun;Jund	sp|P05627|JUN_MOUSE Transcription factor Jun OS=Mus musculus OX=10090 GN=Jun PE=1 SV=3;sp|P15066|JUND_MOUSE Transcription factor JunD OS=Mus musculus OX=10090 GN=Jund PE=1 SV=1	1	0	98.7299	0.00073151	147.4	88.706	142.43	1	66.6829	0.00210925	114.97	1	83.2777	0.00214411	114.51	1	108.262	0.000920136	147.4	1	118.209	0.00119423	135.43	1	89.6086	0.00190017	117.7	1	101.543	0.00141906	138.08	1	89.6086	0.00109235	134.23	1	83.2777	0.00174832	119.68	1	108.262	0.00115748	145.9
P05627	246	P05627	P05627	Transcription factor Jun	Jun	sp|P05627|JUN_MOUSE Transcription factor Jun OS=Mus musculus OX=10090 GN=Jun PE=1 SV=3	0.461846	0.147557	2.03018	8.72552e-05	55.3	49.698	55.3
P07356	2	P07356	P07356	Annexin A2	Anxa2	sp|P07356|ANXA2_MOUSE Annexin A2 OS=Mus musculus OX=10090 GN=Anxa2 PE=1 SV=2	0.5	0.12002	0	0.00020981	88.681	61.199	88.681	0.5	0	0.000265268	85.533					0.5	0	0.00341203	65.627	0.5	0	0.00241404	68.626	0.5	0	0.00477264	72.006	0.5	0	0.00271356	67.726	0.5	0	0.0052982	60.102	0.5	0	0.00266198	67.881
P07901	263	P07901	P07901	Heat shock protein HSP 90-alpha	Hsp90aa1	sp|P07901|HS90A_MOUSE Heat shock protein HSP 90-alpha OS=Mus musculus OX=10090 GN=Hsp90aa1 PE=1 SV=4	1	4.63227e-13	105.481	4.78558e-103	221.37	191.33	221.37	0.940088	11.9565	0.00133557	47.796	0	0		#NUM!	1	105.481	4.78558e-103	221.37	0.99896	29.8253	0.000322517	54.855					1	85.7338	1.43098e-42	191.95	0.998884	29.5185	8.14898e-05	61.546
P08228	108	P08228	P08228	Superoxide dismutase [Cu-Zn]	Sod1	sp|P08228|SODC_MOUSE Superoxide dismutase [Cu-Zn] OS=Mus musculus OX=10090 GN=Sod1 PE=1 SV=2	0.771974	0.038627	8.30649	0.000186362	84.365	65.925	55.196	0.651921	3.14426	0.00288448	84.365	0.681794	3.62814	0.000186362	78.932													0.771974	8.30649	0.0168276	55.196
P08775	1966	P08775	P08775	DNA-directed RNA polymerase II subunit RPB1	Polr2a	sp|P08775|RPB1_MOUSE DNA-directed RNA polymerase II subunit RPB1 OS=Mus musculus OX=10090 GN=Polr2a PE=1 SV=3	0.123605	0.256664	1.86864	0.000616099	42.015	36.414	42.015
P08775	1913	P08775	P08775	DNA-directed RNA polymerase II subunit RPB1	Polr2a	sp|P08775|RPB1_MOUSE DNA-directed RNA polymerase II subunit RPB1 OS=Mus musculus OX=10090 GN=Polr2a PE=1 SV=3	0.938821	0.00795663	14.4008	5.34445e-07	119.32	70.006	119.32									0.929052	13.6935	6.20921e-05	98.582	0.938821	14.4008	5.34445e-07	119.32	0.57529	2.05391	0.000827915	83.692	0.908722	10.4368	7.58516e-07	118.24	0.759244	6.18	9.74385e-07	117.2	0	0		#NUM!	0.639658	5.4894	0.00207934	69.451
P08775	1917	P08775	P08775	DNA-directed RNA polymerase II subunit RPB1	Polr2a	sp|P08775|RPB1_MOUSE DNA-directed RNA polymerase II subunit RPB1 OS=Mus musculus OX=10090 GN=Polr2a PE=1 SV=3	0.335223	0.197868	0	0.00856065	51.405	38.828	51.405									0.305661	0	0.020851	45.54					0	0		#NUM!					0.274321	0	0.0110052	50.024	0	0		#NUM!
P08775	1920	P08775	P08775	DNA-directed RNA polymerase II subunit RPB1	Polr2a	sp|P08775|RPB1_MOUSE DNA-directed RNA polymerase II subunit RPB1 OS=Mus musculus OX=10090 GN=Polr2a PE=1 SV=3	0.3853	0.179894	0	0.0389435	61.932	31.382	61.932					0.341563	0	0.0578449	58.132	0.305661	0	0.020851	45.54					0	0		#NUM!	0.3853	0	0.0389435	61.932	0.274321	0	0.0110052	50.024	0	0		#NUM!
P08775	1878	P08775	P08775	DNA-directed RNA polymerase II subunit RPB1	Polr2a	sp|P08775|RPB1_MOUSE DNA-directed RNA polymerase II subunit RPB1 OS=Mus musculus OX=10090 GN=Polr2a PE=1 SV=3	0.959493	0.00513661	17.4512	0.000735905	84.753	69.124	65.219					0.894099	14.3522	0.00167798	72.175	0.891679	11.7022	0.00270478	66.059	0.908688	12.4683	0.00434811	59.709	0	0		#NUM!	0.89913	11.8961	0.000735905	84.753	0.524939	2.95005	0.00476589	58.885
P09405	145	P09405	P09405	Nucleolin	Ncl	sp|P09405|NUCL_MOUSE Nucleolin OS=Mus musculus OX=10090 GN=Ncl PE=1 SV=2	1	0	103.538	0	283.18	277.99	190.67	1	6.34466	3.35791e-38	128.82	1	72.3513	0	282.98	1	90.927	1.24568e-215	225.63	1	90.1485	2.24505e-149	197.89	1	112.348	0	283.18	1	100.694	4.87763e-234	235.44	1	93.9199	1.32274e-234	241.13	1	68.8973	3.04633e-91	164.61	1	37.2293	1.0437e-109	182.3
P09405	157	P09405	P09405	Nucleolin	Ncl	sp|P09405|NUCL_MOUSE Nucleolin OS=Mus musculus OX=10090 GN=Ncl PE=1 SV=2	1	0	103.538	0	283.18	277.99	190.67	1	6.34466	3.35791e-38	128.82	1	72.3513	0	282.98	1	90.927	1.24568e-215	225.63	1	90.1485	2.24505e-149	197.89	1	112.348	0	283.18	1	100.694	4.87763e-234	235.44	1	93.9199	1.32274e-234	241.13	1	68.8973	3.04633e-91	164.61	1	37.2293	1.0437e-109	182.3
P09405	28	P09405	P09405	Nucleolin	Ncl	sp|P09405|NUCL_MOUSE Nucleolin OS=Mus musculus OX=10090 GN=Ncl PE=1 SV=2	1	0	5.70537	2.04068e-06	60.737	60.737	41.398					1	1.83533	0.000557146	45.623	1	4.45188	2.04068e-06	60.737					1	3.47174	0.000868191	42.375	1	4.50441	0.00033502	42.571	1	5.38337	0.000359812	41.914	1	3.70942	0.000423593	47.018
P09405	34	P09405	P09405	Nucleolin	Ncl	sp|P09405|NUCL_MOUSE Nucleolin OS=Mus musculus OX=10090 GN=Ncl PE=1 SV=2	1	0	5.70537	2.04068e-06	60.737	60.737	41.398					1	1.83533	0.000557146	45.623	1	4.45188	2.04068e-06	60.737					1	3.47174	0.000868191	42.375	1	4.50441	0.00033502	42.571	1	5.38337	0.000359812	41.914	1	3.70942	0.000423593	47.018
P09405	40	P09405	P09405	Nucleolin	Ncl	sp|P09405|NUCL_MOUSE Nucleolin OS=Mus musculus OX=10090 GN=Ncl PE=1 SV=2	1	0	5.70537	2.04068e-06	60.737	60.737	41.398					1	1.83533	0.000557146	45.623	1	4.45188	2.04068e-06	60.737					1	3.47174	0.000868191	42.375	1	4.50441	0.00033502	42.571	1	5.38337	0.000359812	41.914	1	3.70942	0.000423593	47.018
P09405	41	P09405	P09405	Nucleolin	Ncl	sp|P09405|NUCL_MOUSE Nucleolin OS=Mus musculus OX=10090 GN=Ncl PE=1 SV=2	1	0	5.70537	2.04068e-06	60.737	60.737	41.398					1	1.83533	0.000557146	45.623	1	4.45188	2.04068e-06	60.737					1	3.47174	0.000868191	42.375	1	4.50441	0.00033502	42.571	1	5.38337	0.000359812	41.914	1	3.70942	0.000423593	47.018
P09411	203	P09411	P09411	Phosphoglycerate kinase 1	Pgk1	sp|P09411|PGK1_MOUSE Phosphoglycerate kinase 1 OS=Mus musculus OX=10090 GN=Pgk1 PE=1 SV=4	1	0	11.2884	3.62266e-08	108.49	95.062	78.661	1	19.5983	0.000196801	78.794	1	28.3646	3.62266e-08	108.49	1	40.46	1.09139e-07	101.92	0	0		#NUM!	1	16.8695	0.000549296	66.12	1	27.0686	0.000102339	84.493	1	34.2599	9.49842e-05	85.087	1	13.6294	0.000458899	68.567	1	14.1119	0.000853493	60.034
P09450	256	P09450	P09450	Transcription factor JunB	Junb	sp|P09450|JUNB_MOUSE Transcription factor JunB OS=Mus musculus OX=10090 GN=Junb PE=1 SV=1	1	0	13.4062	6.36762e-07	104.18	89.737	55.587	0.937757	10.2905	0.00249956	47.806	1	16.6932	8.83785e-06	104.18	1	27.8879	1.10104e-05	93.5	0.913267	8.00749	0.00357426	50.783	1	6.19954	0.0023773	52.721	1	20.0311	0.000265578	71.927	1	20.8687	0.000685736	89.186	0.966422	13.3557	0.0630647	54.304	0.99704	24.5082	0.00613766	76.294
P09450	248	P09450	P09450	Transcription factor JunB	Junb	sp|P09450|JUNB_MOUSE Transcription factor JunB OS=Mus musculus OX=10090 GN=Junb PE=1 SV=1	1	0	13.4062	3.98392e-46	167.45	156.61	55.587	0.943076	12.3711	7.19584e-09	105.32	1	16.6932	3.12727e-09	108.96	1	27.8879	1.28173e-06	94.201	0.999844	38.0726	3.25824e-22	137.42	1	6.19954	0.0014585	52.391	1	20.0311	2.70701e-36	155.76	1	20.8687	2.1124e-12	113.24	0.997926	26.8609	2.72199e-09	109.32	0.971755	15.478	1.38917e-06	93.572
P09528	5	P09528	P09528	Ferritin heavy chain;Ferritin heavy chain, N-terminally processed	Fth1	sp|P09528|FRIH_MOUSE Ferritin heavy chain OS=Mus musculus OX=10090 GN=Fth1 PE=1 SV=2	0.865893	0.0197764	9.27769	0.00322457	66.19	48.131	47.334					0.825339	8.70391	0.00871122	51.064	0.778428	8.19437	0.0107814	47.894					0.600268	5.24977	0.0117698	46.73	0.72789	6.73299	0.00322457	66.19
P0C7T6	359	P0C7T6	P0C7T6	Ataxin-1-like	Atxn1l	sp|P0C7T6|ATX1L_MOUSE Ataxin-1-like OS=Mus musculus OX=10090 GN=Atxn1l PE=1 SV=1	0.99936	5.02469e-05	31.9374	6.92712e-18	115.55	103.91	112.11					0.99936	31.9374	1.07033e-17	112.11	0.997867	26.7008	6.18599e-14	109.25	0.979463	16.7844	1.63032e-10	100.28					0.967954	14.8008	6.92712e-18	115.55	0.938533	11.8381	8.46111e-18	114.15	0.967518	14.7401	7.52279e-07	79.511
P0DOV2	190	P0DOV2	P0DOV2	Interferon-activable protein 204	Ifi204	sp|P0DOV2|IFI4_MOUSE Interferon-activable protein 204 OS=Mus musculus OX=10090 GN=Ifi204 PE=1 SV=1	0.830359	0.0264928	11.3624	6.60157e-05	62.605	56.498	62.605
P10711	100	P10711	P10711	Transcription elongation factor A protein 1	Tcea1	sp|P10711|TCEA1_MOUSE Transcription elongation factor A protein 1 OS=Mus musculus OX=10090 GN=Tcea1 PE=1 SV=2	0.998948	8.55652e-05	30.1546	2.61138e-11	122.46	88.233	64.295					0.872653	10.2518	0.000596624	92.211	0.998948	30.1546	0.00088875	75.764					0	0		#NUM!	0	0		#NUM!	0.995789	24.1876	2.61138e-11	122.46
Q8CGP2;Q64475;P10853;Q6ZWY9;Q64525;Q64478;P10854;Q8CGP1	37;37;37;37;37;37;37;37	Q8CGP2;Q6ZWY9;Q8CGP1	Q6ZWY9	Histone H2B type 1-P;Histone H2B type 1-B;Histone H2B type 1-F/J/L;Histone H2B type 1-C/E/G;Histone H2B type 2-B;Histone H2B type 1-H;Histone H2B type 1-M;Histone H2B type 1-K	Hist1h2bp;H2bc3;H2bc7;H2bc4;Hist2h2bb;H2bc9;H2bc14;H2bc12	sp|Q8CGP2|H2B1P_MOUSE Histone H2B type 1-P OS=Mus musculus OX=10090 GN=Hist1h2bp PE=1 SV=3;sp|Q64475|H2B1B_MOUSE Histone H2B type 1-B OS=Mus musculus OX=10090 GN=H2bc3 PE=1 SV=3;sp|P10853|H2B1F_MOUSE Histone H2B type 1-F/J/L OS=Mus musculus OX=10090 GN=H2b	0.457158	0.149892	0.330391	2.98194e-06	118.76	63.991	118.76									0.457158	0.330391	2.98194e-06	118.76
Q8CGP2;Q64475;P10853;Q6ZWY9;Q64525;Q64478;P10854;Q8CGP1	39;39;39;39;39;39;39;39	Q8CGP2;Q6ZWY9;Q8CGP1	Q6ZWY9	Histone H2B type 1-P;Histone H2B type 1-B;Histone H2B type 1-F/J/L;Histone H2B type 1-C/E/G;Histone H2B type 2-B;Histone H2B type 1-H;Histone H2B type 1-M;Histone H2B type 1-K	Hist1h2bp;H2bc3;H2bc7;H2bc4;Hist2h2bb;H2bc9;H2bc14;H2bc12	sp|Q8CGP2|H2B1P_MOUSE Histone H2B type 1-P OS=Mus musculus OX=10090 GN=Hist1h2bp PE=1 SV=3;sp|Q64475|H2B1B_MOUSE Histone H2B type 1-B OS=Mus musculus OX=10090 GN=H2bc3 PE=1 SV=3;sp|P10853|H2B1F_MOUSE Histone H2B type 1-F/J/L OS=Mus musculus OX=10090 GN=H2b	0.752716	0.0427061	8.53797	9.1484e-05	102.33	69.472	102.33	0.452092	0.534876	0.000122153	95.273	0.385226	1.1616	0.0182475	60.49					0.743996	7.73486	0.000278797	95.273													0.448803	1.33629	0.0135058	63.401
Q8CGP2;Q64475;P10853;P70696;Q6ZWY9;Q64525;Q64478;P10854;Q8CGP1	92;92;92;93;92;92;92;92;92	Q8CGP2;Q6ZWY9;Q8CGP1	Q6ZWY9	Histone H2B type 1-P;Histone H2B type 1-B;Histone H2B type 1-F/J/L;Histone H2B type 1-A;Histone H2B type 1-C/E/G;Histone H2B type 2-B;Histone H2B type 1-H;Histone H2B type 1-M;Histone H2B type 1-K	Hist1h2bp;H2bc3;H2bc7;H2bc1;H2bc4;Hist2h2bb;H2bc9;H2bc14;H2bc12	sp|Q8CGP2|H2B1P_MOUSE Histone H2B type 1-P OS=Mus musculus OX=10090 GN=Hist1h2bp PE=1 SV=3;sp|Q64475|H2B1B_MOUSE Histone H2B type 1-B OS=Mus musculus OX=10090 GN=H2bc3 PE=1 SV=3;sp|P10853|H2B1F_MOUSE Histone H2B type 1-F/J/L OS=Mus musculus OX=10090 GN=H2b	0.850252	0.0222248	7.90894	0.000376571	73.983	48.393	58.461					0.439675	0	0.00931199	69.716	0.556444	2.44669	0.00147379	58.814	0.845468	7.49323	0.000899692	71.513	0.610008	2.48864	0.00258927	52.862	0.818179	6.86625	0.000812638	69.261	0.586979	2.48949	0.000883884	63.827	0.642856	2.83542	0.000568417	69.485	0.638178	2.83542	0.000376571	73.983
P10922	92	P10922	P10922	Histone H1.0;Histone H1.0, N-terminally processed	H1-0	sp|P10922|H10_MOUSE Histone H1.0 OS=Mus musculus OX=10090 GN=H1-0 PE=2 SV=4	0.969691	0.00368842	15.0506	0.000808998	86.014	32.498	73.499					0.955404	13.3089	0.0201752	57.174	0.666547	3.00797	0.0169232	59.908	0.827816	6.81942	0.0201394	73.499	0.694944	3.57571	0.0219897	55.649	0.951457	12.9226	0.000808998	86.014	0.837768	7.12987	0.0153766	61.213	0.969691	15.0506	0.00399495	73.499
P11087	925	P11087	P11087	Collagen alpha-1(I) chain	Col1a1	sp|P11087|CO1A1_MOUSE Collagen alpha-1(I) chain OS=Mus musculus OX=10090 GN=Col1a1 PE=1 SV=4	0.413845	0.16719	0	4.39343e-07	48.125	40.256	48.125																	0	0		#NUM!	0	0		#NUM!					0	0		#NUM!
P11087	934	P11087	P11087	Collagen alpha-1(I) chain	Col1a1	sp|P11087|CO1A1_MOUSE Collagen alpha-1(I) chain OS=Mus musculus OX=10090 GN=Col1a1 PE=1 SV=4	0.413845	0.167098	0	1.36874e-07	50.214	36.417	48.125																	0	0		#NUM!	0	0		#NUM!	0.378043	1.15061	1.36874e-07	50.214	0	0		#NUM!	0.285509	0.403229	2.37036e-06	41.756
P11276	283	P11276	P11276	Fibronectin;Anastellin	Fn1	sp|P11276|FINC_MOUSE Fibronectin OS=Mus musculus OX=10090 GN=Fn1 PE=1 SV=4	0.499793	0.125214	1.33104	1.47683e-172	266.7	266.7	69.081													0	0		#NUM!	0	0		#NUM!	0.499793	1.33104	0.000392459	69.081					0	0		#NUM!	0	0		#NUM!
P11276	285	P11276	P11276	Fibronectin;Anastellin	Fn1	sp|P11276|FINC_MOUSE Fibronectin OS=Mus musculus OX=10090 GN=Fn1 PE=1 SV=4	0.9961	0.000442366	24.8573	0	385.11	364.33	385.11	0.846001	9.49648	7.80845e-89	214.24	0.988382	20.8337	1.44657e-300	323.38	0.941025	13.6333	0	332.29	0.894333	12.2864	8.50568e-271	308.27	0.915997	10.4898	5.14301e-117	234.51	0.995351	24.4067	7.11454e-300	320.25	0.965375	14.5475	0	365.74	0.9961	24.8573	0	385.11	0.983648	17.8377	1.10192e-243	297.87
P11276	2475	P11276	P11276	Fibronectin;Anastellin	Fn1	sp|P11276|FINC_MOUSE Fibronectin OS=Mus musculus OX=10090 GN=Fn1 PE=1 SV=4	1	0	204.961	0	377.56	353.88	247.94	1	174.043	2.91089e-301	299.21	1	208.639	0	330.84	1	213.709	1.15535e-275	291.31	1	275.859	0	362.98	1	188.394	0	330.59	1	330.083	0	377.56	1	300.278	0	372.29	1	200.387	0	311.24	1	277.46	0	358.45
P11438	174	P11438	P11438	Lysosome-associated membrane glycoprotein 1	Lamp1	sp|P11438|LAMP1_MOUSE Lysosome-associated membrane glycoprotein 1 OS=Mus musculus OX=10090 GN=Lamp1 PE=1 SV=2	0.577611	0.0893719	1.08459	0.0108602	57.136	31.814	46.318																	0.505734	1.03432	0.0108602	57.136	0.541427	0.99234	0.0132114	54.276	0	0		#NUM!
P11438	175	P11438	P11438	Lysosome-associated membrane glycoprotein 1	Lamp1	sp|P11438|LAMP1_MOUSE Lysosome-associated membrane glycoprotein 1 OS=Mus musculus OX=10090 GN=Lamp1 PE=1 SV=2	0.529295	0.107014	0.99234	0.0108602	57.136	31.814	54.276																	0.485786	0.703278	0.0108602	57.136	0.529295	0.99234	0.0132114	54.276	0	0		#NUM!
P11499	226	P11499	P11499	Heat shock protein HSP 90-beta	Hsp90ab1	sp|P11499|HS90B_MOUSE Heat shock protein HSP 90-beta OS=Mus musculus OX=10090 GN=Hsp90ab1 PE=1 SV=3	1	0	70.9287	1.12692e-05	111.61	90.635	77.192	1	46.0223	8.58635e-05	96.331	1	55.2486	0.0023137	72.275	1	70.9287	0.001187	78.098	1	55.2486	0.00863858	60.298					1	62.8686	0.00405737	68.335	1	62.8686	0.00141041	76.943	1	55.2486	0.00297224	70.399
P11499	255	P11499	P11499	Heat shock protein HSP 90-beta	Hsp90ab1	sp|P11499|HS90B_MOUSE Heat shock protein HSP 90-beta OS=Mus musculus OX=10090 GN=Hsp90ab1 PE=1 SV=3	1	2.96324e-12	97.0771	9.09976e-162	268.08	243.12	268.08	0.997513	26.0321	3.42583e-39	182.57	0.999587	33.8348	5.50034e-31	159.34	1	97.0771	9.09976e-162	268.08	0.996767	24.8902	8.15383e-31	157.91	0	0		#NUM!	0.999999	61.82	3.48183e-91	224.64	0.997356	25.7652	6.83905e-39	171.91	0.998249	27.5591	1.77354e-16	136.01
P11862	283	P11862	P11862	Growth arrest-specific protein 2	Gas2	sp|P11862|GAS2_MOUSE Growth arrest-specific protein 2 OS=Mus musculus OX=10090 GN=Gas2 PE=1 SV=1	0.844472	0.0234449	7.36082	0.00118547	82.85	43.066	82.85	0	0		#NUM!	0	0		#NUM!	0.844472	7.36082	0.00118547	82.85	0	0		#NUM!
P11983	544	P11983	P11983	T-complex protein 1 subunit alpha	Tcp1	sp|P11983|TCPA_MOUSE T-complex protein 1 subunit alpha OS=Mus musculus OX=10090 GN=Tcp1 PE=1 SV=3	0.690638	0.0572376	3.49877	6.52104e-06	90.884	79.741	90.884									0.670838	3.12971	0.000182367	70.699					0	0		#NUM!	0.684041	3.36053	0.0016937	59.996					0	0		#NUM!
P11983	551	P11983	P11983	T-complex protein 1 subunit alpha	Tcp1	sp|P11983|TCPA_MOUSE T-complex protein 1 subunit alpha OS=Mus musculus OX=10090 GN=Tcp1 PE=1 SV=3	0.998696	0.000114417	30.1375	1.50809e-16	125.23	107.65	125.23	0.996056	26.484	0.000331156	63.936	0.988999	22.375	0.00332177	46.178	0.998696	30.1375	1.50809e-16	125.23	0.857838	10.6496	0.000658434	58.107	0.973824	18.562	0.00135491	50.858	0.997634	28.4732	0.000193937	70.174	0.914214	13.1046	0.000390877	73.464	0.973136	18.4357	0.00023252	68.42
P12367	96	P12367	P12367	cAMP-dependent protein kinase type II-alpha regulatory subunit	Prkar2a	sp|P12367|KAP2_MOUSE cAMP-dependent protein kinase type II-alpha regulatory subunit OS=Mus musculus OX=10090 GN=Prkar2a PE=1 SV=2	0.999993	3.64858e-07	51.6297	0	321.7	292.58	319.52	0.996853	25.0074	6.6381e-39	142.2	0.999978	46.5473	3.40071e-179	258.83	0.999993	51.6297	0	319.52	0.999734	35.7458	5.58469e-89	178.72	0.996106	24.0788	5.68829e-49	156.2	0.99989	39.5912	5.53235e-245	288.83	0.999977	46.3239	1.47916e-144	242.05	0.999868	38.7979	1.61588e-30	137.94	0.9982	27.4392	6.8056e-24	130.43
P12382	775	P12382	P12382	ATP-dependent 6-phosphofructokinase, liver type	Pfkl	sp|P12382|PFKAL_MOUSE ATP-dependent 6-phosphofructokinase, liver type OS=Mus musculus OX=10090 GN=Pfkl PE=1 SV=4	0.999905	6.5195e-06	40.2252	0.000741212	129.74	110.96	78.098	0.994511	22.5814	0.0193159	72.928	0.999222	31.0869	0.00141812	97.163	0.999801	37.0004	0.000959528	124.12	0.999762	36.2372	0.00090932	125.42	0.99883	29.3145	0.00132587	116.6	0.999431	32.4477	0.00148429	113.61	0.999905	40.2252	0.00114424	120.03	0.927386	11.0624	0.00103048	99.752	0.992963	21.4953	0.000769993	129
P13595	774	P13595	P13595	Neural cell adhesion molecule 1	Ncam1	sp|P13595|NCAM1_MOUSE Neural cell adhesion molecule 1 OS=Mus musculus OX=10090 GN=Ncam1 PE=1 SV=3	0.999428	4.57004e-05	32.4227	6.19552e-13	127.49	117	127.49	0.899888	9.537	0.000466034	75.358	0.979172	16.722	2.29336e-05	95.622	0.999428	32.4227	6.19552e-13	127.49	0.971011	15.2499	0.000490635	74.505	0.988773	19.4484	0.000223973	84.107	0.997785	26.5361	6.92523e-08	109.37	0.997082	25.3371	3.7935e-05	91.64	0.810165	6.30198	0.00244373	49.528	0.728517	4.28696	0.00190079	55.763
P13595	1005	P13595	P13595	Neural cell adhesion molecule 1	Ncam1	sp|P13595|NCAM1_MOUSE Neural cell adhesion molecule 1 OS=Mus musculus OX=10090 GN=Ncam1 PE=1 SV=3	0.653836	0.0678634	5.48192	6.50853e-08	76.921	66.31	44.147					0.506679	1.79299	7.49176e-05	50.94					0.595659	3.73822	6.50853e-08	76.921	0	0		#NUM!	0.621189	3.04012	3.04864e-05	56.933	0.533562	2.73742	0.000151191	50.042					0.51721	3.26197	3.91653e-06	63.116
P13864	138	P13864	P13864	DNA (cytosine-5)-methyltransferase 1	Dnmt1	sp|P13864|DNMT1_MOUSE DNA (cytosine-5)-methyltransferase 1 OS=Mus musculus OX=10090 GN=Dnmt1 PE=1 SV=5	0.188962	0.249127	0	0.0027491	41.136	32.313	41.136
P13864	140	P13864	P13864	DNA (cytosine-5)-methyltransferase 1	Dnmt1	sp|P13864|DNMT1_MOUSE DNA (cytosine-5)-methyltransferase 1 OS=Mus musculus OX=10090 GN=Dnmt1 PE=1 SV=5	0.188962	0.249023	0	0.0027491	41.136	32.313	41.136
P13864	142	P13864	P13864	DNA (cytosine-5)-methyltransferase 1	Dnmt1	sp|P13864|DNMT1_MOUSE DNA (cytosine-5)-methyltransferase 1 OS=Mus musculus OX=10090 GN=Dnmt1 PE=1 SV=5	0.188962	0.24923	0	0.0027491	41.136	32.313	41.136
P14069	46	P14069	P14069	Protein S100-A6	S100a6	sp|P14069|S10A6_MOUSE Protein S100-A6 OS=Mus musculus OX=10090 GN=S100a6 PE=1 SV=3	0.999682	2.46202e-05	34.9788	7.30772e-16	136.48	102.79	125.61	0.86167	7.94425	2.16666e-10	121.27	0.721109	4.12567	7.30772e-16	136.48	0.999682	34.9788	2.6004e-11	125.61	0.942357	12.1347	0.000213621	97.579	0.949754	12.7651	0.00138164	64.565	0.740827	4.56127	0.000374942	84.375	0.946858	12.5085	5.71447e-05	94.01					0.727199	4.25808	0.000668391	74.793
P14404	1041	P14404	P14404	Histone-lysine N-methyltransferase MECOM	Mecom	sp|P14404|MECOM_MOUSE Histone-lysine N-methyltransferase MECOM OS=Mus musculus OX=10090 GN=Mecom PE=1 SV=2	0.999975	1.62738e-06	46.0404	1.27631e-82	231.15	157.48	231.15					0.923989	10.8482	7.43528e-14	134.93	0.998278	27.6314	7.31308e-69	216.77	0.999975	46.0404	1.27631e-82	231.15	0.910088	10.0617	9.19789e-10	129.32	0.90111	9.94863	7.66506e-07	118.2	0.99781	26.5888	4.11768e-29	170.79	0	0		#NUM!
P14404	728	P14404	P14404	Histone-lysine N-methyltransferase MECOM	Mecom	sp|P14404|MECOM_MOUSE Histone-lysine N-methyltransferase MECOM OS=Mus musculus OX=10090 GN=Mecom PE=1 SV=2	0.870013	0.0187253	8.25784	0.00174415	80.387	52.905	80.387					0	0		#NUM!	0.870013	8.25784	0.00328964	80.387	0.849454	7.69922	0.00236409	70.837
P14733	24	P14733	P14733	Lamin-B1	Lmnb1	sp|P14733|LMNB1_MOUSE Lamin-B1 OS=Mus musculus OX=10090 GN=Lmnb1 PE=1 SV=3	0.690484	0.0573135	3.5754	0.000493996	81.278	33.99	81.278	0	0		#NUM!									0.667105	4.27424	0.00179532	74.987	0	0		#NUM!	0.690484	3.5754	0.000493996	81.278	0	0		#NUM!					0.642227	3.14937	0.00348837	67.964
P14733	303	P14733	P14733	Lamin-B1	Lmnb1	sp|P14733|LMNB1_MOUSE Lamin-B1 OS=Mus musculus OX=10090 GN=Lmnb1 PE=1 SV=3	0.285034	0.22167	0	0.0130652	58.978	12.372	51.092													0.25	0	0.0130652	58.978													0.285034	0	0.020177	51.092
P14733	305	P14733	P14733	Lamin-B1	Lmnb1	sp|P14733|LMNB1_MOUSE Lamin-B1 OS=Mus musculus OX=10090 GN=Lmnb1 PE=1 SV=3	0.285034	0.221574	0	0.0130652	58.978	12.372	51.092													0.25	0	0.0130652	58.978													0.285034	0	0.020177	51.092
P14733	306	P14733	P14733	Lamin-B1	Lmnb1	sp|P14733|LMNB1_MOUSE Lamin-B1 OS=Mus musculus OX=10090 GN=Lmnb1 PE=1 SV=3	0.285034	0.221478	0	0.0130652	58.978	12.372	51.092													0.25	0	0.0130652	58.978													0.285034	0	0.020177	51.092
P14733	309	P14733	P14733	Lamin-B1	Lmnb1	sp|P14733|LMNB1_MOUSE Lamin-B1 OS=Mus musculus OX=10090 GN=Lmnb1 PE=1 SV=3	0.25	0.233248	0	0.0130652	58.978	12.372	58.978													0.25	0	0.0130652	58.978
P14869	304	P14869	P14869	Large ribosomal subunit protein uL10	Rplp0	sp|P14869|RLA0_MOUSE Large ribosomal subunit protein uL10 OS=Mus musculus OX=10090 GN=Rplp0 PE=1 SV=3	1	0	118.456	9.83359e-63	178.19	170.77	156.11					1	12.9964	0.00059768	64.203	1	82.1915	2.95072e-35	152.13	0	0		#NUM!	0	0		#NUM!	1	93.295	1.62276e-26	138.35	1	39.7338	1.39165e-07	93.73	0	0		#NUM!
P14869	307	P14869	P14869	Large ribosomal subunit protein uL10	Rplp0	sp|P14869|RLA0_MOUSE Large ribosomal subunit protein uL10 OS=Mus musculus OX=10090 GN=Rplp0 PE=1 SV=3	1	0	118.456	9.83359e-63	178.19	170.77	156.11					1	12.9964	0.00059768	64.203	1	82.1915	2.95072e-35	152.13	0	0		#NUM!	0	0		#NUM!	1	93.295	1.62276e-26	138.35	1	39.7338	2.85429e-10	110.37	0	0		#NUM!
P14873	1384	P14873	P14873	Microtubule-associated protein 1B;MAP1B heavy chain;MAP1 light chain LC1	Map1b	sp|P14873|MAP1B_MOUSE Microtubule-associated protein 1B OS=Mus musculus OX=10090 GN=Map1b PE=1 SV=2	0.83391	0.0256409	7.00774	3.47319e-07	95.157	78.663	95.157									0.83391	7.00774	3.47319e-07	95.157
P14873	23	P14873	P14873	Microtubule-associated protein 1B;MAP1B heavy chain;MAP1 light chain LC1	Map1b	sp|P14873|MAP1B_MOUSE Microtubule-associated protein 1B OS=Mus musculus OX=10090 GN=Map1b PE=1 SV=2	0.170853	0.25215	0.414546	9.41593e-07	65.377	54.272	52.155																	0.170853	0.414546	0.000104165	52.155	0.15417	0	9.41593e-07	65.377
P14873	25	P14873	P14873	Microtubule-associated protein 1B;MAP1B heavy chain;MAP1 light chain LC1	Map1b	sp|P14873|MAP1B_MOUSE Microtubule-associated protein 1B OS=Mus musculus OX=10090 GN=Map1b PE=1 SV=2	0.42413	0.163073	3.29465	2.97478e-12	97.609	84.67	96.55	0.42413	3.29465	3.75701e-12	96.55	0.40894	3.36403	5.16732e-12	91.967	0.391729	1.98416	3.14715e-06	71.874									0.15417	0	9.41593e-07	65.377	0.240217	0	4.28795e-05	57.832
P14873	27	P14873	P14873	Microtubule-associated protein 1B;MAP1B heavy chain;MAP1 light chain LC1	Map1b	sp|P14873|MAP1B_MOUSE Microtubule-associated protein 1B OS=Mus musculus OX=10090 GN=Map1b PE=1 SV=2	0.233349	0.239644	0.701458	2.81936e-06	67.814	56.073	67.814																					0.233349	0.701458	2.81936e-06	67.814
P14873	1788	P14873	P14873	Microtubule-associated protein 1B;MAP1B heavy chain;MAP1 light chain LC1	Map1b	sp|P14873|MAP1B_MOUSE Microtubule-associated protein 1B OS=Mus musculus OX=10090 GN=Map1b PE=1 SV=2	0.499995	0.122912	0	4.15229e-09	110.37	88.134	110.37
P14873	1789	P14873	P14873	Microtubule-associated protein 1B;MAP1B heavy chain;MAP1 light chain LC1	Map1b	sp|P14873|MAP1B_MOUSE Microtubule-associated protein 1B OS=Mus musculus OX=10090 GN=Map1b PE=1 SV=2	0.968651	0.00384399	14.9129	4.15229e-09	110.37	88.134	99.813	0.900095	9.54745	4.24036e-07	100.77	0.896267	9.36647	1.13112e-08	107.98	0.844018	8.22585	2.7492e-08	102.58	0.954765	13.4909	2.95078e-07	101.05	0.896281	9.36647	1.41631e-08	107.03	0.894097	9.26642	4.24036e-07	100.77	0.951393	12.9217	8.37074e-09	108.96	0.692796	4.18736	0.0113945	44.436	0.887126	8.97989	7.79867e-05	84.829
P14873	1793	P14873	P14873	Microtubule-associated protein 1B;MAP1B heavy chain;MAP1 light chain LC1	Map1b	sp|P14873|MAP1B_MOUSE Microtubule-associated protein 1B OS=Mus musculus OX=10090 GN=Map1b PE=1 SV=2	0.96606	0.00418565	19.0637	0.000828823	70.837	53.556	55.204					0.714468	7.00771	0.00893908	46.514	0.775231	8.87127	0.000828823	70.837									0.96606	19.0637	0.00388062	55.204
P14873	1813	P14873	P14873	Microtubule-associated protein 1B;MAP1B heavy chain;MAP1 light chain LC1	Map1b	sp|P14873|MAP1B_MOUSE Microtubule-associated protein 1B OS=Mus musculus OX=10090 GN=Map1b PE=1 SV=2	0.333325	0.199965	0	8.88632e-75	160.16	148	160.16
P14873	1814	P14873	P14873	Microtubule-associated protein 1B;MAP1B heavy chain;MAP1 light chain LC1	Map1b	sp|P14873|MAP1B_MOUSE Microtubule-associated protein 1B OS=Mus musculus OX=10090 GN=Map1b PE=1 SV=2	0.677927	0.060537	5.18537	8.88632e-75	160.16	148	130.95													0.677927	5.18537	1.75339e-33	130.95
P14873	1815	P14873	P14873	Microtubule-associated protein 1B;MAP1B heavy chain;MAP1 light chain LC1	Map1b	sp|P14873|MAP1B_MOUSE Microtubule-associated protein 1B OS=Mus musculus OX=10090 GN=Map1b PE=1 SV=2	0.886468	0.0166195	9.22575	4.01504e-146	210.43	192.69	122.87									0.6632	3.41691	4.01504e-146	210.43																	0.807949	6.74165	2.16548e-81	183.01
P14873	1497	P14873	P14873	Microtubule-associated protein 1B;MAP1B heavy chain;MAP1 light chain LC1	Map1b	sp|P14873|MAP1B_MOUSE Microtubule-associated protein 1B OS=Mus musculus OX=10090 GN=Map1b PE=1 SV=2	0.988851	0.00127031	19.4791	9.96306e-108	194.06	179.46	165.49	0.833711	7.00188	1.362e-12	101.27	0.816292	6.47719	1.03262e-67	167.62	0.932128	11.3778	2.6094e-45	149.67	0.874333	8.42465	5.97355e-23	117.94	0.604414	2.04539	0.00300401	40.986	0.546431	1.57082	5.54211e-06	78.079	0.988851	19.4791	1.48889e-67	165.49	0.769259	5.23092	2.31665e-11	95.435	0.709078	3.88641	1.11232e-11	98.657
P14873	1438	P14873	P14873	Microtubule-associated protein 1B;MAP1B heavy chain;MAP1 light chain LC1	Map1b	sp|P14873|MAP1B_MOUSE Microtubule-associated protein 1B OS=Mus musculus OX=10090 GN=Map1b PE=1 SV=2	0.91487	0.0117483	10.7069	3.31491e-05	78.758	72.182	49.618
P14873	1781	P14873	P14873	Microtubule-associated protein 1B;MAP1B heavy chain;MAP1 light chain LC1	Map1b	sp|P14873|MAP1B_MOUSE Microtubule-associated protein 1B OS=Mus musculus OX=10090 GN=Map1b PE=1 SV=2	0.999651	2.72337e-05	35.5862	0.000217932	104.43	42.874	89.171					0.999651	35.5862	0.000633751	89.171	0.99787	26.77	0.000217932	104.43					0.922468	11.7454	0.0279987	50.791	0.979769	17.1108	0.00447655	72.2	0.98904	19.9644	0.0018811	79.201	0.954261	14.7533	0.0312982	49.189
P14873	1422	P14873	P14873	Microtubule-associated protein 1B;MAP1B heavy chain;MAP1 light chain LC1	Map1b	sp|P14873|MAP1B_MOUSE Microtubule-associated protein 1B OS=Mus musculus OX=10090 GN=Map1b PE=1 SV=2	0.999749	1.99559e-05	36.0043	0.00422236	78.556	53.258	68.456									0.977052	16.2918	0.0349427	50.473					0.959292	13.7228	0.0431189	45.598	0.98411	17.9193	0.0505493	64.04	0.999468	32.7358	0.00797504	72.643					0.979523	16.7974	0.040454	47.187
P14873	1257	P14873	P14873	Microtubule-associated protein 1B;MAP1B heavy chain;MAP1 light chain LC1	Map1b	sp|P14873|MAP1B_MOUSE Microtubule-associated protein 1B OS=Mus musculus OX=10090 GN=Map1b PE=1 SV=2	0.461885	0.147467	1.80756	1.89352e-06	60.991	47.309	60.991																	0.443804	1.00317	0.000215465	52.731
P14873	1260	P14873	P14873	Microtubule-associated protein 1B;MAP1B heavy chain;MAP1 light chain LC1	Map1b	sp|P14873|MAP1B_MOUSE Microtubule-associated protein 1B OS=Mus musculus OX=10090 GN=Map1b PE=1 SV=2	0.889884	0.0159961	11.4121	4.46768e-27	132.26	103.58	115.11	0.39397	1.91409	0.0280446	42.118	0.804151	7.52726	4.46768e-27	132.26	0.530126	1.68735	3.22881e-11	105.16	0.380588	0.00112743	5.1727e-05	65.753					0.590479	4.83006	3.88396e-06	79.445	0.538478	3.5581	0.000261659	56.468	0.605785	5.03278	2.56463e-06	80.683	0.423178	1.98547	0.000203277	58.015
P14873	1291	P14873	P14873	Microtubule-associated protein 1B;MAP1B heavy chain;MAP1 light chain LC1	Map1b	sp|P14873|MAP1B_MOUSE Microtubule-associated protein 1B OS=Mus musculus OX=10090 GN=Map1b PE=1 SV=2	0.499992	0.123005	0	1.58924e-58	169.39	150	169.39	0	0		#NUM!					0.499992	0	1.58924e-58	169.39					0	0		#NUM!
P14873	1293	P14873	P14873	Microtubule-associated protein 1B;MAP1B heavy chain;MAP1 light chain LC1	Map1b	sp|P14873|MAP1B_MOUSE Microtubule-associated protein 1B OS=Mus musculus OX=10090 GN=Map1b PE=1 SV=2	0.988646	0.00128698	19.445	2.8801e-83	185.14	174.59	185.14	0.917828	11.5898	1.31964e-13	107.23	0.926305	11.1544	1.83869e-30	138.3	0.970594	15.3359	1.58924e-58	169.39	0.910108	10.0781	2.19567e-20	121.94	0.968912	15.2492	5.1989e-23	122.51	0.979308	16.9749	5.79531e-39	145.2	0.942402	12.3257	6.15868e-39	144.76	0.91522	10.6478	1.33241e-13	107.19	0.961812	14.2446	2.56373e-13	102.97
P14873	1307	P14873	P14873	Microtubule-associated protein 1B;MAP1B heavy chain;MAP1 light chain LC1	Map1b	sp|P14873|MAP1B_MOUSE Microtubule-associated protein 1B OS=Mus musculus OX=10090 GN=Map1b PE=1 SV=2	0.972513	0.00330372	18.8336	0.000251421	53.482	44.988	50.593	0	0		#NUM!	0.965318	16.867	0.000251421	53.262	0.972513	18.8336	0.000401678	53.482					0	0		#NUM!	0.942437	14.3734	0.00300139	40.454
P14873	1911	P14873	P14873	Microtubule-associated protein 1B;MAP1B heavy chain;MAP1 light chain LC1	Map1b	sp|P14873|MAP1B_MOUSE Microtubule-associated protein 1B OS=Mus musculus OX=10090 GN=Map1b PE=1 SV=2	0.998514	0.00013031	29.418	7.07234e-12	124.18	102.02	124.18									0.867485	10.0723	0.00184343	67.364					0.309575	0	0.00334553	44.391	0.998514	29.418	7.07234e-12	124.18	0.995946	27.3952	1.52665e-07	109.04
P14873	1915	P14873	P14873	Microtubule-associated protein 1B;MAP1B heavy chain;MAP1 light chain LC1	Map1b	sp|P14873|MAP1B_MOUSE Microtubule-associated protein 1B OS=Mus musculus OX=10090 GN=Map1b PE=1 SV=2	0.309575	0.212224	0	0.00334553	44.391	39.389	44.391																	0.309575	0	0.00334553	44.391
P14873	2030	P14873	P14873	Microtubule-associated protein 1B;MAP1B heavy chain;MAP1 light chain LC1	Map1b	sp|P14873|MAP1B_MOUSE Microtubule-associated protein 1B OS=Mus musculus OX=10090 GN=Map1b PE=1 SV=2	0.561689	0.0942943	4.15085	3.27791e-06	105.77	82.548	105.77									0.418375	2.43648	0.0015984	62.203	0.398247	2.55715	0.0036946	53.779	0.268182	0	0.000971355	70.942	0.396072	1.95045	0.0017447	60.764	0.356783	0.648903	0.00309287	54.974
P14873	1391	P14873	P14873	Microtubule-associated protein 1B;MAP1B heavy chain;MAP1 light chain LC1	Map1b	sp|P14873|MAP1B_MOUSE Microtubule-associated protein 1B OS=Mus musculus OX=10090 GN=Map1b PE=1 SV=2	0.540612	0.102843	0.720445	3.15354e-11	91.722	85.427	87.803	0.440563	0.330175	5.14605e-11	91.722																					0.540612	0.720445	3.15354e-11	87.803
P14873	1395	P14873	P14873	Microtubule-associated protein 1B;MAP1B heavy chain;MAP1 light chain LC1	Map1b	sp|P14873|MAP1B_MOUSE Microtubule-associated protein 1B OS=Mus musculus OX=10090 GN=Map1b PE=1 SV=2	0.93802	0.00818694	11.8535	2.46712e-62	152.41	143.72	128.6					0.928822	11.1848	3.61878e-43	136.67	0.685141	4.34454	2.17889e-07	81.341	0.85399	7.72794	2.30434e-43	139.94	0.789952	5.78038	2.46712e-62	152.41	0.804635	6.16269	1.38702e-32	125.02					0.763548	5.24192	5.21854e-11	91.583	0.699963	4.49571	5.48491e-17	107.23
P14873	1775	P14873	P14873	Microtubule-associated protein 1B;MAP1B heavy chain;MAP1 light chain LC1	Map1b	sp|P14873|MAP1B_MOUSE Microtubule-associated protein 1B OS=Mus musculus OX=10090 GN=Map1b PE=1 SV=2	1	1.44443e-09	73.0637	2.60758e-17	153.7	111.49	153.7	0.989543	19.7602	0.0426252	47.774	0.999997	55.7545	5.73887e-05	113.53	1	73.0637	2.60758e-17	153.7	0.999931	41.6375	0.00127154	81.185	0.996918	25.0979	0.00444927	74.987	0.999999	61.4667	2.22374e-16	146.96	0.999996	54.359	2.22374e-16	146.96	0.999421	32.3735	0.0101091	68.168	0.995977	23.9375	0.00964446	61.423
P14901	242	P14901	P14901	Heme oxygenase 1;Heme oxygenase 1 soluble form	Hmox1	sp|P14901|HMOX1_MOUSE Heme oxygenase 1 OS=Mus musculus OX=10090 GN=Hmox1 PE=1 SV=1	0.933401	0.00887369	13.412	0.00108929	57.826	49.604	57.826																					0.933401	13.412	0.00108929	57.826
P15066	245	P15066	P15066	Transcription factor JunD	Jund	sp|P15066|JUND_MOUSE Transcription factor JunD OS=Mus musculus OX=10090 GN=Jund PE=1 SV=1	0.896129	0.0152887	9.60649	1.81599e-14	86.675	76.792	86.675	0.514963	0	4.40904e-05	57.829	0.52937	0	2.9482e-06	69.032	0.600843	0.332683	2.05877e-05	60.606	0.896129	9.60649	1.81599e-14	86.675	0.462139	0	0.00680276	51.774	0.543592	0	1.25938e-11	84.198	0.522369	0	7.64705e-05	54.867	0.52873	0	4.97643e-05	55.638	0.489301	0	0.000295377	48.318
P15066	249	P15066	P15066	Transcription factor JunD	Jund	sp|P15066|JUND_MOUSE Transcription factor JunD OS=Mus musculus OX=10090 GN=Jund PE=1 SV=1	0.89862	0.0148468	9.60649	1.81599e-14	89.677	80.612	86.675	0.514963	0	4.40904e-05	57.829	0.525237	0	2.9482e-06	69.032	0.61926	0.64106	2.05877e-05	60.606	0.89862	9.60649	1.81599e-14	86.675	0.462139	0	0.00680276	51.774	0.566116	0.0728572	1.25938e-11	84.198	0.522369	0	7.64705e-05	54.867	0.52873	0	4.97643e-05	55.638	0.489301	0	0.000295377	48.318
P15066	253	P15066	P15066	Transcription factor JunD	Jund	sp|P15066|JUND_MOUSE Transcription factor JunD OS=Mus musculus OX=10090 GN=Jund PE=1 SV=1	0.878213	0.0174285	8.8875	1.25938e-11	89.677	80.612	89.677	0.566995	1.14811	4.40904e-05	57.829	0.670762	3.41882	2.9482e-06	69.032	0.657586	3.07114	2.05877e-05	60.606	0.681081	3.41672	2.82243e-11	80.178	0.605583	3.76923	0.00680276	51.774	0.619329	1.37169	1.25938e-11	84.198	0.642542	2.8849	7.64705e-05	54.867	0.681929	3.27677	4.97643e-05	55.638	0.721039	5.73753	0.000295377	48.318
P15208	1337	P15208	P15208	Insulin receptor;Insulin receptor subunit alpha;Insulin receptor subunit beta	Insr	sp|P15208|INSR_MOUSE Insulin receptor OS=Mus musculus OX=10090 GN=Insr PE=1 SV=2	0.700747	0.0547638	5.00928	0.00344721	75.474	64.601	75.474									0.684334	4.74147	0.00504365	69.276	0.700747	5.00928	0.00344721	75.474
P15261	370	P15261	P15261	Interferon gamma receptor 1	Ifngr1	sp|P15261|INGR1_MOUSE Interferon gamma receptor 1 OS=Mus musculus OX=10090 GN=Ifngr1 PE=1 SV=3	0.310481	0.211845	0	0.000873316	52.707	40.328	52.707
P15261	379	P15261	P15261	Interferon gamma receptor 1	Ifngr1	sp|P15261|INGR1_MOUSE Interferon gamma receptor 1 OS=Mus musculus OX=10090 GN=Ifngr1 PE=1 SV=3	0.830496	0.0263919	8.62142	1.31176e-09	92.41	81.05	56.172					0.624945	2.37714	1.31176e-09	92.41	0.643732	2.76074	6.17178e-08	87.952	0.761194	5.34476	7.58361e-08	87.881	0.830496	8.62142	0.000178205	56.172	0	0		#NUM!
P15864;P43274;P43276;P43277	102;102;102;103	P15864;P43274;P43276;P43277	P15864	Histone H1.2;Histone H1.4;Histone H1.5;Histone H1.3	H1-2;H1-4;H1-5;H1-3	sp|P15864|H12_MOUSE Histone H1.2 OS=Mus musculus OX=10090 GN=H1-2 PE=1 SV=2;sp|P43274|H14_MOUSE Histone H1.4 OS=Mus musculus OX=10090 GN=H1-4 PE=1 SV=2;sp|P43276|H15_MOUSE Histone H1.5 OS=Mus musculus OX=10090 GN=H1-5 PE=1 SV=2;sp|P43277|H13_MOUSE Histone	0.580401	0.0876665	1.40947	0.00376303	76.326	49.869	76.326	0.580401	1.40947	0.00376303	76.326
P15864;P43274;P43276;P43277	104;104;104;105	P15864;P43274;P43276;P43277	P15864	Histone H1.2;Histone H1.4;Histone H1.5;Histone H1.3	H1-2;H1-4;H1-5;H1-3	sp|P15864|H12_MOUSE Histone H1.2 OS=Mus musculus OX=10090 GN=H1-2 PE=1 SV=2;sp|P43274|H14_MOUSE Histone H1.4 OS=Mus musculus OX=10090 GN=H1-4 PE=1 SV=2;sp|P43276|H15_MOUSE Histone H1.5 OS=Mus musculus OX=10090 GN=H1-5 PE=1 SV=2;sp|P43277|H13_MOUSE Histone	0.999979	1.28881e-06	46.8306	1.56791e-12	197.68	145.28	197.68					0.903122	9.69523	1.80431e-08	130.44	0.948601	12.675	0.039349	48.468	0.700219	3.68432	0.00241951	77.74	0.987376	18.933	6.01245e-08	126.83	0.999979	46.8306	8.58063e-09	197.68	0.990082	19.9923	1.56791e-12	137.58	0.59517	1.67369	9.18097e-08	124.12	0.843797	7.32559	0.000529716	97.463
P15864;P43277	36;37	P15864;P43277	P15864	Histone H1.2;Histone H1.3	H1-2;H1-3	sp|P15864|H12_MOUSE Histone H1.2 OS=Mus musculus OX=10090 GN=H1-2 PE=1 SV=2;sp|P43277|H13_MOUSE Histone H1.3 OS=Mus musculus OX=10090 GN=H1-3 PE=1 SV=2	1	2.65303e-10	79.6825	1.85591e-89	233.9	138.4	209.12	0.999828	37.6489	4.73701e-19	161.24	0.999996	53.5286	4.48464e-40	197.1	1	64.7402	9.89549e-75	228.45	1	79.6825	4.64606e-50	209.12	0.999933	41.7089	7.47892e-50	206.81	0.999999	59.194	1.81463e-61	218.43	0.999999	60.971	1.85591e-89	233.9	0.9996	33.9737	1.81952e-26	181.51	0.999506	33.0643	1.33838e-25	174.87
P15864	2	P15864	P15864	Histone H1.2	H1-2	sp|P15864|H12_MOUSE Histone H1.2 OS=Mus musculus OX=10090 GN=H1-2 PE=1 SV=2	1	0	67.4646	7.66811e-15	113.05	103.65	107.65	1	39.0153	3.18288e-08	89.829	1	34.2599	1.19455e-11	108.92	1	33.0686	3.30653e-11	103.9	1	45.0278	1.92406e-11	107.18	1	34.0077	2.51272e-11	105.79	1	40.4997	1.03909e-11	109.28	1	51.388	3.07555e-11	104.45	1	44.856	2.42059e-10	99.711	1	34.0747	3.95338e-11	102.37
P15920	695	P15920	P15920	V-type proton ATPase 116 kDa subunit a 2	Atp6v0a2	sp|P15920|VPP2_MOUSE V-type proton ATPase 116 kDa subunit a 2 OS=Mus musculus OX=10090 GN=Atp6v0a2 PE=1 SV=2	0.984396	0.00186243	17.9993	5.46305e-14	109.42	97.634	105.96	0.919089	10.5545	6.73583e-08	87.485	0.884309	8.84862	0.000390712	62.377	0.984396	17.9993	1.35764e-13	105.96					0.830761	7.8143	0.0255694	42.242					0.925282	11.0193	4.22873e-06	68.88					0.61283	2.07619	0.000702906	58.914
P16045	8	P16045	P16045	Galectin-1	Lgals1	sp|P16045|LEG1_MOUSE Galectin-1 OS=Mus musculus OX=10090 GN=Lgals1 PE=1 SV=3	1	0	16.4705	0.000582404	62.663	53.379	52.509	1	7.26404	0.00281598	44.105									1	27.591	0.000582404	55.705	0	0		#NUM!	1	16.772	0.000694835	53.779					1	7.56614	0.00354522	41.521
P16045	30	P16045	P16045	Galectin-1	Lgals1	sp|P16045|LEG1_MOUSE Galectin-1 OS=Mus musculus OX=10090 GN=Lgals1 PE=1 SV=3	0.999949	3.85635e-06	42.9215	3.86959e-18	130.83	121.78	126.32	0.996812	24.9508	9.47574e-05	77.53	0.999111	30.5082	5.12253e-07	98.703	0.995983	23.9431	0.00108693	53.773	0.999847	38.1665	8.23692e-07	96.881					0.999436	32.4837	8.55806e-07	95.195	0.999598	33.9587	3.86959e-18	130.83
P16254	45	P16254	P16254	Signal recognition particle 14 kDa protein	Srp14	sp|P16254|SRP14_MOUSE Signal recognition particle 14 kDa protein OS=Mus musculus OX=10090 GN=Srp14 PE=1 SV=1	0.996498	0.000367831	24.5416	9.25671e-75	228.76	190.18	228.76	0.87191	8.32957	0.000106939	94.09	0.996498	24.5416	9.25671e-75	228.76	0.978361	16.5526	3.69259e-61	213.69	0.972723	15.5219	7.68176e-32	183.75	0.862831	7.98671	0.00099752	79.875	0.93458	11.5491	5.95359e-40	195.23	0.969235	14.9837	2.30694e-18	156.98	0.75522	4.89298	0.00120991	78.763	0.833999	7.01054	0.00394923	67.115
P16546	1217	P16546	P16546	Spectrin alpha chain, non-erythrocytic 1	Sptan1	sp|P16546|SPTN1_MOUSE Spectrin alpha chain, non-erythrocytic 1 OS=Mus musculus OX=10090 GN=Sptan1 PE=1 SV=4	1	0	9.63421	0.000700906	86.944	50.097	45.614	1	15.6595	0.0130734	42.52	1	18.6039	0.0130147	56.599	1	46.495	0.000700906	86.944									0	0		#NUM!	1	18.0073	0.00453452	55.885	1	18.0073	0.0233092	51.771	1	15.6595	0.0105581	45.614
P16858;S4R1W1;A0A1D5RLD8	208;208;208	P16858	P16858	Glyceraldehyde-3-phosphate dehydrogenase	Gapdh;Gapdhrt;Gapdhrt2	sp|P16858|G3P_MOUSE Glyceraldehyde-3-phosphate dehydrogenase OS=Mus musculus OX=10090 GN=Gapdh PE=1 SV=2;tr|S4R1W1|S4R1W1_MOUSE Glyceraldehyde-3-phosphate dehydrogenase OS=Mus musculus OX=10090 GN=Gapdhrt PE=1 SV=1;tr|A0A1D5RLD8|A0A1D5RLD8_MOUSE Glyceralde	0.60775	0.0799572	1.90162	0.00343115	65.092	45.352	65.092									0.60775	1.90162	0.00343115	65.092
P17095	99	P17095	P17095	High mobility group protein HMG-I/HMG-Y	Hmga1	sp|P17095|HMGA1_MOUSE High mobility group protein HMG-I/HMG-Y OS=Mus musculus OX=10090 GN=Hmga1 PE=1 SV=4	1	0	58.1223	2.20417e-129	235.54	223.59	108.32	1	28.5186	4.12976e-13	118.32	1	77.7899	8.01377e-72	185.71	1	62.0581	2.20417e-129	235.54	1	67.1268	1.18154e-89	205.63	1	43.2291	4.72709e-80	197.99	1	37.0872	9.65694e-72	184.29	1	45.5372	4.28212e-72	188.95	1	42.2322	9.27397e-81	201.85	1	26.9953	1.2313e-89	205.33
P17095	102	P17095	P17095	High mobility group protein HMG-I/HMG-Y	Hmga1	sp|P17095|HMGA1_MOUSE High mobility group protein HMG-I/HMG-Y OS=Mus musculus OX=10090 GN=Hmga1 PE=1 SV=4	1	0	58.1223	0	365.38	344.07	108.32	1	28.5186	9.82023e-284	311.27	1	77.7899	1.4305e-283	312.39	1	62.0581	0	334.98	1	67.1268	0	325.35	1	43.2291	0	365.38	1	37.0872	4.93467e-256	294.44	1	45.5372	0	318.9	1	42.2322	1.28361e-230	284.81	1	26.9953	2.37485e-230	287
P17095	103	P17095	P17095	High mobility group protein HMG-I/HMG-Y	Hmga1	sp|P17095|HMGA1_MOUSE High mobility group protein HMG-I/HMG-Y OS=Mus musculus OX=10090 GN=Hmga1 PE=1 SV=4	1	0	58.1223	9.82023e-284	311.27	290.64	108.32	1	28.5186	9.82023e-284	311.27	1	77.7899	1.30921e-256	301.42	1	62.0581	1.11799e-207	282.09	1	67.1268	4.91859e-207	276.56	1	43.2291	1.76909e-185	270.37	1	37.0872	4.93467e-256	294.44	1	45.5372	9.99832e-231	286.81	1	42.2322	1.28361e-230	284.81	1	26.9953	1.81725e-207	281.07
P17095	36	P17095	P17095	High mobility group protein HMG-I/HMG-Y	Hmga1	sp|P17095|HMGA1_MOUSE High mobility group protein HMG-I/HMG-Y OS=Mus musculus OX=10090 GN=Hmga1 PE=1 SV=4	0.866442	0.0196916	9.47415	5.78384e-24	117.94	103.17	117.94	0.667691	3.96492	5.20605e-05	61.186	0.647435	3.01558	4.12142e-05	64.954	0.808642	6.3299	1.27353e-07	86.543	0.774614	5.3858	4.32042e-11	93.505	0.793748	6.23268	3.39622e-11	95.244	0.866442	9.47415	5.78384e-24	117.94	0.597972	3.95573	9.20091e-17	107.3	0.84441	7.80057	8.25351e-08	88.295	0.611707	3.04351	2.08682e-05	72.228
P17095	44	P17095	P17095	High mobility group protein HMG-I/HMG-Y	Hmga1	sp|P17095|HMGA1_MOUSE High mobility group protein HMG-I/HMG-Y OS=Mus musculus OX=10090 GN=Hmga1 PE=1 SV=4	0.879229	0.01731	11.8536	6.41629e-06	78.662	68.313	78.662																					0.589308	5.56897	4.02165e-05	65.301	0.879229	11.8536	6.41629e-06	78.662	0	0		#NUM!
P17095	2	P17095	P17095	High mobility group protein HMG-I/HMG-Y	Hmga1	sp|P17095|HMGA1_MOUSE High mobility group protein HMG-I/HMG-Y OS=Mus musculus OX=10090 GN=Hmga1 PE=1 SV=4	0.753677	0.0425096	4.87517	7.17076e-07	111.64	83.971	111.64									0.434982	2.17362	0.00245083	52.5									0.753677	4.87517	7.17076e-07	111.64
P17095	4	P17095	P17095	High mobility group protein HMG-I/HMG-Y	Hmga1	sp|P17095|HMGA1_MOUSE High mobility group protein HMG-I/HMG-Y OS=Mus musculus OX=10090 GN=Hmga1 PE=1 SV=4	0.434661	0.159889	2.06858	0.000648313	70.529	51.205	70.529																									0.434661	2.06858	0.000648313	70.529
P17095	6	P17095	P17095	High mobility group protein HMG-I/HMG-Y	Hmga1	sp|P17095|HMGA1_MOUSE High mobility group protein HMG-I/HMG-Y OS=Mus musculus OX=10090 GN=Hmga1 PE=1 SV=4	0.545995	0.100537	2.11585	0.00011879	88.768	65.057	88.768
P17182	427	P17182	P17182	Alpha-enolase	Eno1	sp|P17182|ENOA_MOUSE Alpha-enolase OS=Mus musculus OX=10090 GN=Eno1 PE=1 SV=3	1	0	22.6205	0.000167599	81.904	51.421	41.621	1	34.9673	0.00231231	59.709									1	41.0514	0.000167599	81.904	0	0		#NUM!	1	22.4308	0.00213932	60.55
P17225	456	P17225	P17225	Polypyrimidine tract-binding protein 1	Ptbp1	sp|P17225|PTBP1_MOUSE Polypyrimidine tract-binding protein 1 OS=Mus musculus OX=10090 GN=Ptbp1 PE=1 SV=3	0.498241	0.128486	0	4.23606e-05	77.575	62.632	46.819					0.440821	0	4.23606e-05	77.575	0	0		#NUM!
P17225	457	P17225	P17225	Polypyrimidine tract-binding protein 1	Ptbp1	sp|P17225|PTBP1_MOUSE Polypyrimidine tract-binding protein 1 OS=Mus musculus OX=10090 GN=Ptbp1 PE=1 SV=3	0.811032	0.0305217	6.59242	1.83337e-07	90.475	78.883	90.475					0.674801	3.22243	4.23606e-05	77.575	0.695002	3.59763	0.0115948	64.82	0.64093	2.81113	1.77037e-05	80.061
P17742	51	P17742	P17742	Peptidyl-prolyl cis-trans isomerase A;Peptidyl-prolyl cis-trans isomerase A, N-terminally processed	Ppia	sp|P17742|PPIA_MOUSE Peptidyl-prolyl cis-trans isomerase A OS=Mus musculus OX=10090 GN=Ppia PE=1 SV=2	0.583397	0.0863176	1.76134	2.60009e-05	85.231	69.81	60.401					0.583397	1.76134	0.0029756	60.401	0	0		#NUM!					0.461695	0	2.60009e-05	85.231
P17742	52	P17742	P17742	Peptidyl-prolyl cis-trans isomerase A;Peptidyl-prolyl cis-trans isomerase A, N-terminally processed	Ppia	sp|P17742|PPIA_MOUSE Peptidyl-prolyl cis-trans isomerase A OS=Mus musculus OX=10090 GN=Ppia PE=1 SV=2	0.676485	0.0611588	3.41698	3.10546e-28	141.97	119.07	60.691	0.658436	2.89471	8.24234e-05	78.456	0	0		#NUM!	0	0		#NUM!	0.642186	2.64657	8.14924e-09	102.48	0.561003	2.34767	2.60009e-05	85.231	0.641704	2.62523	3.10546e-28	141.97	0.544075	1.98638	0.000377676	60.747	0.64969	2.88074	1.20139e-06	94.671	0.545196	4.10221	0.025099	45.784
P18581	645	P18581	P18581	Cationic amino acid transporter 2	Slc7a2	sp|P18581|CTR2_MOUSE Cationic amino acid transporter 2 OS=Mus musculus OX=10090 GN=Slc7a2 PE=1 SV=3	1	0	112.33	5.74175e-12	156.81	109.93	135.65	1	22.4308	3.42288e-06	118.37	1	138.012	3.13111e-09	156.81	1	70.829	0.00146571	82.069	1	42.8623	5.74175e-12	154.74	1	100.283	5.20259e-11	132.97	1	121.564	7.4103e-11	138.2	1	7.03411	3.19435e-05	109.51	1	97.1377	6.97281e-06	114.72	1	20.8711	0.000719271	104.24
P18608	84	P18608	P18608	Non-histone chromosomal protein HMG-14	Hmgn1	sp|P18608|HMGN1_MOUSE Non-histone chromosomal protein HMG-14 OS=Mus musculus OX=10090 GN=Hmgn1 PE=1 SV=2	0.854616	0.0215811	10.2437	1.8505e-194	218.27	203.46	117.94	0.719178	4.84645	6.10825e-05	54.388	0.5563	0	4.17638e-22	75.625	0.71805	4.49869	4.31891e-46	135.03	0.700552	3.58069	1.35087e-16	74.393	0.81972	8.3342	8.25957e-128	185.41	0.503062	1.69642	2.36669e-48	117.9	0.624188	2.79977	5.99543e-17	99.709					0.839397	7.6692	1.8505e-194	218.27
P18608	87	P18608	P18608	Non-histone chromosomal protein HMG-14	Hmgn1	sp|P18608|HMGN1_MOUSE Non-histone chromosomal protein HMG-14 OS=Mus musculus OX=10090 GN=Hmgn1 PE=1 SV=2	0.984349	0.00186969	18.0075	0	286.18	268.01	169.52	0	0		#NUM!	0.868448	9.85869	3.29568e-171	202.8	0.73223	4.98862	5.06174e-06	62.428	0.968483	16.7712	0	286.18	0.90817	10.0923	1.20892e-45	137.34	0.984349	18.0075	4.20076e-88	169.52	0.919643	10.6015	1.37814e-171	208.68	0.824751	8.41918	5.68284e-75	156.81	0.903874	12.8408	5.86347e-38	127.05
P18608	7	P18608	P18608	Non-histone chromosomal protein HMG-14	Hmgn1	sp|P18608|HMGN1_MOUSE Non-histone chromosomal protein HMG-14 OS=Mus musculus OX=10090 GN=Hmgn1 PE=1 SV=2	1	0	131.824	6.54281e-17	147.46	119.13	139.04	1	91.6951	2.79064e-05	111.75	1	84.6926	2.24168e-05	116.11	1	110.449	9.1178e-05	110.45	1	109.619	1.30256e-05	112.99	1	87.7182	8.45295e-05	97.767	1	116.891	2.26184e-06	116.95	1	102.552	0.000205323	107.51	1	124.295	6.93462e-09	130.92	1	105.809	2.66208e-05	105.81
P18608	95	P18608	P18608	Non-histone chromosomal protein HMG-14	Hmgn1	sp|P18608|HMGN1_MOUSE Non-histone chromosomal protein HMG-14 OS=Mus musculus OX=10090 GN=Hmgn1 PE=1 SV=2	0.999891	7.75059e-06	41.0024	4.16413e-108	172.69	157.67	172.69	0.585164	5.2585	1.86307e-05	54.647	0.997408	26.4055	6.52277e-29	114.41	0.998789	29.7464	3.5258e-22	108.75	0	0		#NUM!													0.343573	0	5.68284e-75	156.81
P18653	352	P18653	P18653	Ribosomal protein S6 kinase alpha-1	Rps6ka1	sp|P18653|KS6A1_MOUSE Ribosomal protein S6 kinase alpha-1 OS=Mus musculus OX=10090 GN=Rps6ka1 PE=1 SV=1	0.920993	0.0108548	10.6667	1.87309e-05	81.157	72.556	73.057					0.609184	1.94411	1.87309e-05	81.157	0.684647	3.4134	0.000709593	71.651	0.656124	3.9132	0.00290611	45.099	0	0		#NUM!	0.736655	4.54996	0.000782654	52.19					0	0		#NUM!	0.585463	1.78108	0.00340117	57.692
P18654	715	P18654	P18654	Ribosomal protein S6 kinase alpha-3	Rps6ka3	sp|P18654|KS6A3_MOUSE Ribosomal protein S6 kinase alpha-3 OS=Mus musculus OX=10090 GN=Rps6ka3 PE=1 SV=2	1	0	41.2594	2.98525e-05	119.74	92.315	70.089					1	59.0525	0.000464651	83.137	1	79.6968	0.000249563	87.641	1	43.713	0.00103125	78.903	1	39.213	0.00200933	73.848	1	72.2723	2.98525e-05	109.72	1	51.488	0.000322457	86.114	1	65.1716	0.0023296	119.74	1	40.7249	0.00571745	65.179
P18654	369	P18654	P18654	Ribosomal protein S6 kinase alpha-3	Rps6ka3	sp|P18654|KS6A3_MOUSE Ribosomal protein S6 kinase alpha-3 OS=Mus musculus OX=10090 GN=Rps6ka3 PE=1 SV=2	0.998493	0.000132292	28.2191	4.05709e-33	142.79	127.86	142.79	0.993655	21.9929	1.19301e-13	111.97	0.979305	16.8095	1.30437e-26	139.69	0.994358	22.4681	4.1363e-26	134.47	0.948444	12.6494	2.96845e-26	136.62	0.998493	28.2191	4.05709e-33	142.79	0.99518	23.156	1.70022e-19	128.88	0.998273	27.6595	2.41417e-26	137.64	0.994944	22.9773	1.97485e-19	128.38	0.986921	18.7811	5.31142e-19	122.3
P18760	3	P18760	P18760	Cofilin-1	Cfl1	sp|P18760|COF1_MOUSE Cofilin-1 OS=Mus musculus OX=10090 GN=Cfl1 PE=1 SV=3	1	1.58393e-09	72.7993	1.06651e-143	248.35	224.67	148.96	0.999992	50.9083	1.40883e-135	248.35	0.999999	61.679	3.45574e-61	185.28	0.999997	56.0049	2.4867e-17	125.61	0.999995	53.1551	3.40101e-09	129.71	1	70.6531	6.98975e-119	238.8	1	72.7993	1.60632e-55	180.93	0.999999	58.6944	2.14532e-69	197.69	0.999973	45.7418	1.3453e-92	222.96	0.999999	62.5755	1.37361e-118	233.85
P18760	8	P18760	P18760	Cofilin-1	Cfl1	sp|P18760|COF1_MOUSE Cofilin-1 OS=Mus musculus OX=10090 GN=Cfl1 PE=1 SV=3	0.523725	0.109347	0.412462	2.03837e-05	45.79	29.671	45.79					0	0		#NUM!	0	0		#NUM!																					0.523725	0.412462	2.03837e-05	45.79
P19324	140	P19324	P19324	Serpin H1	Serpinh1	sp|P19324|SERPH_MOUSE Serpin H1 OS=Mus musculus OX=10090 GN=Serpinh1 PE=1 SV=3	0.902108	0.014247	12.2104	0.000339058	90.444	75.072	57.788	0.690909	7.95678	0.000339058	90.444	0.902108	12.2104	0.00582389	57.788									0.778824	8.21397	0.00204905	72.417					0.839382	9.00233	0.00676654	55.755	0.441521	1.15978	0.00320484	84.842	0.415632	1.21845	0.0311941	48.405
P19426	49	P19426	P19426	Negative elongation factor E	Nelfe	sp|P19426|NELFE_MOUSE Negative elongation factor E OS=Mus musculus OX=10090 GN=Nelfe PE=1 SV=2	0.555699	0.0966731	0.973137	0.000846481	65.298	48.935	65.298
P19426	51	P19426	P19426	Negative elongation factor E	Nelfe	sp|P19426|NELFE_MOUSE Negative elongation factor E OS=Mus musculus OX=10090 GN=Nelfe PE=1 SV=2	0.814129	0.0298182	6.41483	6.99134e-28	145.69	123.78	109.24	0.751497	4.80598	2.62874e-06	94.845	0.811469	6.33888	1.47149e-12	119.62					0.765502	5.13807	5.63156e-09	109.87	0.785857	5.64651	2.39934e-17	129.32	0.771633	5.28834	0.000473021	71.376	0.808827	6.26428	6.99134e-28	145.69	0.814129	6.41483	7.51613e-09	109.24
P19426	115	P19426	P19426	Negative elongation factor E	Nelfe	sp|P19426|NELFE_MOUSE Negative elongation factor E OS=Mus musculus OX=10090 GN=Nelfe PE=1 SV=2	0.999382	4.79456e-05	32.0884	2.89568e-32	187.74	178.78	187.74	0.947107	12.9857	1.26617e-08	125.61	0.959334	13.7284	7.20846e-09	128.35	0.989907	19.9159	1.06092e-13	140.31	0.990942	20.3901	1.02631e-18	157.56	0.989152	19.599	6.2962e-10	131.66	0.991572	20.7061	1.76782e-18	154.1	0.971899	15.389	1.62874e-17	148.48	0.954768	13.2445	5.11489e-07	121.45	0.993409	21.7818	4.43852e-13	134.61
P19973	243	P19973	P19973	Lymphocyte-specific protein 1	Lsp1	sp|P19973|LSP1_MOUSE Lymphocyte-specific protein 1 OS=Mus musculus OX=10090 GN=Lsp1 PE=1 SV=2	0.921658	0.0106307	11.7957	2.23578e-05	86.211	78.765	55.588	0.921658	11.7957	0.000877462	55.588	0.791419	6.59833	0.000877462	55.588	0.591244	1.96681	0.0007593	56.947	0.673556	3.70664	0.000218204	69.071	0.636877	3.19345	0.00160171	50.271	0.661831	3.60091	0.0007593	56.947					0.859383	7.95839	0.000349067	65.213	0.826382	7.26565	0.000368555	64.028
P20152	459	P20152	P20152	Vimentin	Vim	sp|P20152|VIME_MOUSE Vimentin OS=Mus musculus OX=10090 GN=Vim PE=1 SV=3	0.807429	0.0312875	6.22512	3.96464e-17	138.73	120.76	94.461	0	0		#NUM!	0.5	0	0.00383412	61.102	0.674367	3.16168	9.52326e-05	92.265	0.657478	2.83193	0.00434161	57.788	0.807429	6.22512	0.000359034	94.461					0.685265	3.37914	0.000247233	96.673	0.5	0	0.0327189	62.377	0.674536	3.16502	0.00120031	75.968
P20152	430	P20152	P20152	Vimentin	Vim	sp|P20152|VIME_MOUSE Vimentin OS=Mus musculus OX=10090 GN=Vim PE=1 SV=3	0.974957	0.00295047	17.2843	0.000236542	79.489	60.951	75.55	0.837644	9.18378	0.000362008	73.11	0.917817	10.8521	0.000236542	79.489	0.974542	16.302	0.00113346	57.496	0.974957	17.2843	0.000314021	75.55					0.908295	10.915	0.000546737	67.43					0.81785	7.25836	0.00120642	56.719	0.909579	13.0526	0.00440556	43.696
P20152	144	P20152	P20152	Vimentin	Vim	sp|P20152|VIME_MOUSE Vimentin OS=Mus musculus OX=10090 GN=Vim PE=1 SV=3	1	0	30.7525	7.20188e-10	113.53	78.355	97.271					1	35.9041	1.24359e-07	107.45	1	42.1579	0.000672218	83.213	1	22.3405	0.000669727	69.763	0	0		#NUM!	0	0		#NUM!	1	47.9375	2.90335e-08	110.77					1	25.8293	7.20188e-10	113.53
P20152	412	P20152	P20152	Vimentin	Vim	sp|P20152|VIME_MOUSE Vimentin OS=Mus musculus OX=10090 GN=Vim PE=1 SV=3	0.857591	0.0209962	7.81254	1.39093e-44	146.45	143.39	146.45	0.658923	3.0746	2.00385e-22	115.94					0	0		#NUM!	0.511261	3.13878	0.000100937	57.299																	0.550005	4.08989	6.91867e-05	59.873
P20152	419	P20152	P20152	Vimentin	Vim	sp|P20152|VIME_MOUSE Vimentin OS=Mus musculus OX=10090 GN=Vim PE=1 SV=3	0.5898	0.0847098	2.74057	0.000563897	86.738	74.356	63.709					0.455696	0	0.00340019	62.287	0	0		#NUM!
P20152	420	P20152	P20152	Vimentin	Vim	sp|P20152|VIME_MOUSE Vimentin OS=Mus musculus OX=10090 GN=Vim PE=1 SV=3	0.678597	0.0603041	3.59861	2.61394e-09	124.42	98.298	124.42					0.455696	0	0.00340019	62.287	0	0		#NUM!
P20152	409	P20152	P20152	Vimentin	Vim	sp|P20152|VIME_MOUSE Vimentin OS=Mus musculus OX=10090 GN=Vim PE=1 SV=3	0.348318	0.193306	0	6.90778e-06	72.22	65.716	72.22													0.306678	0	0.00264835	40.454
P20152	72	P20152	P20152	Vimentin	Vim	sp|P20152|VIME_MOUSE Vimentin OS=Mus musculus OX=10090 GN=Vim PE=1 SV=3	0.820169	0.0288047	6.59038	0.0104765	68.355	49.749	68.355																	0.632581	2.35954	0.0158164	42.802	0.811458	6.33858	0.0104765	50.09									0.820169	6.59038	0.0195499	68.355
P20152	73	P20152	P20152	Vimentin	Vim	sp|P20152|VIME_MOUSE Vimentin OS=Mus musculus OX=10090 GN=Vim PE=1 SV=3	0.998855	9.6153e-05	29.4071	1.03805e-18	184.87	131.75	184.87	0.89159	9.15098	0.00035131	147.58	0.897592	9.42747	7.94532e-08	163.45	0.851635	7.58923	0.00037233	147.24	0.95682	13.4555	3.19128e-08	168.83	0.974594	15.8389	9.57809e-06	160.67	0.954277	13.1954	6.50936e-08	165.07	0.704206	3.76711	1.55989e-08	170.68	0.979439	16.7793	0.000126773	151.13	0.853108	7.64005	0.000570691	122.18
P20152	214	P20152	P20152	Vimentin	Vim	sp|P20152|VIME_MOUSE Vimentin OS=Mus musculus OX=10090 GN=Vim PE=1 SV=3	1	0	23.3397	0.0194498	65.179	37.698	42.976									1	52.7352	0.0194498	65.179
P20152	325	P20152	P20152	Vimentin	Vim	sp|P20152|VIME_MOUSE Vimentin OS=Mus musculus OX=10090 GN=Vim PE=1 SV=3	0.9993	5.66291e-05	31.5485	1.82642e-49	160.92	148.5	122.51	0.875027	8.52912	3.98615e-06	72.086	0.657814	3.91889	0.000240053	54.744	0.967577	14.7621	8.48489e-24	130.6	0.990879	20.3608	2.67918e-30	137.16	0.997505	26.0514	4.02097e-30	134.68	0.998362	27.8742	1.82642e-49	160.92	0.999012	30.0572	3.45863e-30	135.72	0.942104	12.2855	1.57995e-09	91.722	0.976692	16.2399	1.20606e-10	100.88
P20152	339	P20152	P20152	Vimentin	Vim	sp|P20152|VIME_MOUSE Vimentin OS=Mus musculus OX=10090 GN=Vim PE=1 SV=3	0.832592	0.0260404	8.76934	1.10065e-09	94.73	78.615	74.274									0.564344	1.1673	2.34245e-09	93.446
P20152	54	P20152	P20152	Vimentin	Vim	sp|P20152|VIME_MOUSE Vimentin OS=Mus musculus OX=10090 GN=Vim PE=1 SV=3	0.261131	0.229718	0	0.0035145	47.037	33.228	45.434													0	0		#NUM!	0	0		#NUM!	0.261131	0	0.0035145	45.434					0.224524	0	0.00869037	42.568
P20152	55	P20152	P20152	Vimentin	Vim	sp|P20152|VIME_MOUSE Vimentin OS=Mus musculus OX=10090 GN=Vim PE=1 SV=3	0.832789	0.0259404	9.15207	2.65755e-47	182.57	146.84	182.57													0.584889	1.97134	2.65755e-47	182.57	0	0		#NUM!	0.261131	0	0.0035145	45.434					0.485231	1.97134	2.65755e-47	182.57
P20152	56	P20152	P20152	Vimentin	Vim	sp|P20152|VIME_MOUSE Vimentin OS=Mus musculus OX=10090 GN=Vim PE=1 SV=3	0.998056	0.00018694	29.8986	1.78089e-47	196.33	169.24	164.93	0.778693	5.7846	4.69244e-29	169.04	0.998056	29.8986	1.87037e-28	164.93	0.801162	6.09813	1.78089e-47	196.33	0	0		#NUM!	0.947468	13.5783	1.04465e-33	180.97	0.782458	5.65338	8.47071e-29	169.04	0.772564	5.65338	2.95459e-39	183.96	0.224524	0	0.00869037	42.568	0.766042	5.5182	8.47071e-29	169.04
P20152	65	P20152	P20152	Vimentin	Vim	sp|P20152|VIME_MOUSE Vimentin OS=Mus musculus OX=10090 GN=Vim PE=1 SV=3	0.369373	0.186751	0	3.19684e-05	82.885	76.007	82.885	0.331843	0	0.00027139	82.885	0.327519	0	6.70665e-05	73.831					0.369373	0	3.19684e-05	82.885					0.229151	0	0.00175457	53.998	0.303847	0	0.000515516	67.413	0.310914	0	0.00124415	64.52	0.206808	0	0.000491334	63.869
P20152	66	P20152	P20152	Vimentin	Vim	sp|P20152|VIME_MOUSE Vimentin OS=Mus musculus OX=10090 GN=Vim PE=1 SV=3	0.829254	0.0267963	6.97541	9.76485e-26	139.51	123.11	139.51	0.56154	2.52339	0.00027139	82.885	0.660737	3.29691	6.1379e-13	114.56	0.592516	3.04361	4.62947e-07	96.487	0.829254	6.97541	9.76485e-26	139.51					0.229151	0	0.00175457	53.998	0.501486	2.33575	0.000515516	67.413	0.310914	0	0.00124415	64.52	0.215917	0.14471	0.000491334	63.869
P20152	39	P20152	P20152	Vimentin	Vim	sp|P20152|VIME_MOUSE Vimentin OS=Mus musculus OX=10090 GN=Vim PE=1 SV=3	0.999946	4.09404e-06	43.1591	8.32236e-82	227.91	195.85	227.91	0.995806	25.9105	3.09469e-14	133.71	0.99222	21.6854	4.81524e-07	115.38	0.998449	30.211	4.78023e-28	164.7	0.996562	26.694	3.00919e-39	189.09	0.993836	24.3158	4.59706e-14	140.31	0.998154	29.8747	4.63932e-28	164.93	0.99896	31.8847	2.44676e-68	214.58	0.999946	43.1591	8.32236e-82	227.91	0.992741	21.6854	7.23372e-07	112.12
P20152	42	P20152	P20152	Vimentin	Vim	sp|P20152|VIME_MOUSE Vimentin OS=Mus musculus OX=10090 GN=Vim PE=1 SV=3	0.543938	0.101459	3.60673	0.00272749	53.169	43.886	44.511	0	0		#NUM!	0	0		#NUM!	0.543938	3.60673	0.00387249	50.079	0.326465	3.12249	0.00904942	43.454	0	0		#NUM!	0	0		#NUM!	0.344672	3.65755	0.00272749	53.169	0	0		#NUM!
P20152	47	P20152	P20152	Vimentin	Vim	sp|P20152|VIME_MOUSE Vimentin OS=Mus musculus OX=10090 GN=Vim PE=1 SV=3	0.675942	0.0613143	7.34885	0.00140628	78.486	16.078	72.496	0	0		#NUM!	0.436433	2.58366	0.0390605	49.333	0.675942	7.34885	0.0144398	72.496	0.444537	2.00487	0.00140628	78.486	0.262495	0	0.0150543	51.695	0	0		#NUM!					0	0		#NUM!
P20152	49	P20152	P20152	Vimentin	Vim	sp|P20152|VIME_MOUSE Vimentin OS=Mus musculus OX=10090 GN=Vim PE=1 SV=3	0.262495	0.228841	0	0.0150543	51.695	11.671	51.695	0	0		#NUM!	0	0		#NUM!									0.262495	0	0.0150543	51.695	0	0		#NUM!					0	0		#NUM!
P20357	1783	P20357	P20357	Microtubule-associated protein 2	Map2	sp|P20357|MTAP2_MOUSE Microtubule-associated protein 2 OS=Mus musculus OX=10090 GN=Map2 PE=1 SV=2	0.881418	0.0170367	9.27133	1.86752e-20	149	129.24	149	0.495383	0	2.90439e-13	139.6	0.698103	6.65091	1.57374e-05	105.53	0.881418	9.27133	1.86752e-20	149					0.390891	0	0.0309193	65.805	0.769307	7.05071	2.18905e-05	102.72					0.464336	1.67658	0.00366276	48.616
P22005	244	P22005	P22005	Proenkephalin-A;Synenkephalin;Met-enkephalin;PENK(114-133);PENK(143-184);Met-enkephalin-Arg-Ser-Leu;Leu-enkephalin;PENK(238-259);Met-enkephalin-Arg-Phe	Penk	sp|P22005|PENK_MOUSE Proenkephalin-A OS=Mus musculus OX=10090 GN=Penk PE=1 SV=2	0.399253	0.174089	1.54389	4.94401e-06	56.914	49.347	56.914													0.399253	1.54389	4.94401e-06	56.914
P22005	252	P22005	P22005	Proenkephalin-A;Synenkephalin;Met-enkephalin;PENK(114-133);PENK(143-184);Met-enkephalin-Arg-Ser-Leu;Leu-enkephalin;PENK(238-259);Met-enkephalin-Arg-Phe	Penk	sp|P22005|PENK_MOUSE Proenkephalin-A OS=Mus musculus OX=10090 GN=Penk PE=1 SV=2	0.337765	0.197105	0.229418	0.000128854	56.156	45.525	56.156									0.337765	0.229418	0.000128854	56.156
P23198	95	P23198	P23198	Chromobox protein homolog 3	Cbx3	sp|P23198|CBX3_MOUSE Chromobox protein homolog 3 OS=Mus musculus OX=10090 GN=Cbx3 PE=1 SV=2	0.870123	0.0186419	9.95111	0.00027151	84.859	26.224	84.859	0.392122	1.78545	0.011443	41.088	0	0		#NUM!					0	0		#NUM!					0.749044	8.05005	0.0359829	52.5	0	0		#NUM!
P23198	97	P23198	P23198	Chromobox protein homolog 3	Cbx3	sp|P23198|CBX3_MOUSE Chromobox protein homolog 3 OS=Mus musculus OX=10090 GN=Cbx3 PE=1 SV=2	0.555755	0.0965814	4.11633	0.0092938	63.691	45.236	63.691					0	0		#NUM!	0.285596	0.753566	0.0127059	61.641	0	0		#NUM!									0	0		#NUM!
P23198	176	P23198	P23198	Chromobox protein homolog 3	Cbx3	sp|P23198|CBX3_MOUSE Chromobox protein homolog 3 OS=Mus musculus OX=10090 GN=Cbx3 PE=1 SV=2	0.994621	0.000593599	22.6693	1.23782e-16	144.65	138.54	132.03	0.99006	19.9827	9.84798e-05	109.24	0.993449	21.8086	1.72814e-05	115.65	0.988265	19.2541	1.23782e-16	144.65	0.987793	19.0807	2.39967e-05	113.22	0.974258	15.7803	3.85442e-08	123.8	0.961855	14.0167	0.000122669	108.37	0.986753	18.7209	0.000109725	90.614	0.929017	11.1687	2.70429e-05	112.13	0.980179	16.9419	0.000286125	100.55
P23242	364	P23242	P23242	Gap junction alpha-1 protein	Gja1	sp|P23242|CXA1_MOUSE Gap junction alpha-1 protein OS=Mus musculus OX=10090 GN=Gja1 PE=1 SV=2	0.580573	0.0874866	1.412	2.39156e-23	128.07	121.27	109.39	0.5	0	1.41832e-05	69.435	0.5	0	8.28094e-08	87.952	0.5	0	1.09465e-09	98.135					0.5	0	9.07265e-06	74.579	0.580573	1.412	1.15799e-11	109.39	0.5	0	4.61189e-18	118.67	0.5	0	0.000299347	55.469
P23242	365	P23242	P23242	Gap junction alpha-1 protein	Gja1	sp|P23242|CXA1_MOUSE Gap junction alpha-1 protein OS=Mus musculus OX=10090 GN=Gja1 PE=1 SV=2	0.634921	0.0720419	2.40332	2.39156e-23	128.07	121.27	87.881	0.5	0	1.41832e-05	69.435	0.5	0	8.28094e-08	87.952	0.5	0	1.09465e-09	98.135					0.5	0	9.07265e-06	74.579	0.634921	2.40332	8.44248e-08	87.881	0.5	0	4.61189e-18	118.67	0.5	0	0.000299347	55.469
P23242	306	P23242	P23242	Gap junction alpha-1 protein	Gja1	sp|P23242|CXA1_MOUSE Gap junction alpha-1 protein OS=Mus musculus OX=10090 GN=Gja1 PE=1 SV=2	1	8.53029e-10	76.2286	8.2219e-15	141.55	124.3	134.14	1	75.6071	8.2219e-15	141.55									0.82293	9.23362	0.0170105	49.865													0.997093	28.2726	0.000437071	72.634
P23242	255	P23242	P23242	Gap junction alpha-1 protein	Gja1	sp|P23242|CXA1_MOUSE Gap junction alpha-1 protein OS=Mus musculus OX=10090 GN=Gja1 PE=1 SV=2	0.498087	0.128576	5.70984	0.000242462	54.658	44.942	54.658													0.436438	3.84567	0.00234071	42.347																	0	0		#NUM!
P23249	967	P23249	P23249	Putative helicase MOV-10	Mov10	sp|P23249|MOV10_MOUSE Putative helicase MOV-10 OS=Mus musculus OX=10090 GN=Mov10 PE=1 SV=2	0.39692	0.175285	2.9011	0.0018723	40.937	30.326	40.937					0.39692	2.9011	0.0018723	40.937
P23249	970	P23249	P23249	Putative helicase MOV-10	Mov10	sp|P23249|MOV10_MOUSE Putative helicase MOV-10 OS=Mus musculus OX=10090 GN=Mov10 PE=1 SV=2	0.44074	0.157087	2.45826	1.34396e-16	103.85	87.134	103.85									0.44074	2.45826	1.34396e-16	103.85	0.33959	2.05738	1.62414e-05	71.117									0.271032	1.22944	0.00159523	42.59
P23949;P23950	477;331	P23949;P23950	P23949	mRNA decay activator protein ZFP36L2;mRNA decay activator protein ZFP36L1	Zfp36l2;Zfp36l1	sp|P23949|TISD_MOUSE mRNA decay activator protein ZFP36L2 OS=Mus musculus OX=10090 GN=Zfp36l2 PE=1 SV=2;sp|P23950|TISB_MOUSE mRNA decay activator protein ZFP36L1 OS=Mus musculus OX=10090 GN=Zfp36l1 PE=1 SV=1	0.486221	0.136893	0	0.000840441	84.718	69.38	84.718													0.486221	0	0.000840441	84.718
P23949;P23950	480;334	P23949;P23950	P23949	mRNA decay activator protein ZFP36L2;mRNA decay activator protein ZFP36L1	Zfp36l2;Zfp36l1	sp|P23949|TISD_MOUSE mRNA decay activator protein ZFP36L2 OS=Mus musculus OX=10090 GN=Zfp36l2 PE=1 SV=2;sp|P23950|TISB_MOUSE mRNA decay activator protein ZFP36L1 OS=Mus musculus OX=10090 GN=Zfp36l1 PE=1 SV=1	0.928682	0.00967164	12.809	4.91492e-09	125.54	114.39	125.54	0.687144	5.7216	2.70932e-05	97.417	0.802593	7.78061	3.52579e-05	101.2	0.76563	8.15147	0.000429577	86.911	0.493763	1.08313	3.37653e-05	102.38	0.78265	6.85855	1.67447e-05	113.24	0.901311	12.6164	4.91492e-09	122.93	0.715751	5.83183	7.24818e-05	86.497	0.811102	6.67384	2.3736e-05	105.46	0.863169	11.0094	2.71381e-05	104.41
P23949	57	P23949	P23949	mRNA decay activator protein ZFP36L2	Zfp36l2	sp|P23949|TISD_MOUSE mRNA decay activator protein ZFP36L2 OS=Mus musculus OX=10090 GN=Zfp36l2 PE=1 SV=2	0.714932	0.0513176	4.04547	9.3043e-17	102.72	95.443	75.758					0.550486	1.56277	0.000187945	49.967	0.609547	2.03664	2.10195e-06	77.791	0.714932	4.04547	3.25294e-06	75.758					0.685484	3.60916	6.84206e-12	95.878	0.625161	2.23003	9.3043e-17	102.72
P23949	59	P23949	P23949	mRNA decay activator protein ZFP36L2	Zfp36l2	sp|P23949|TISD_MOUSE mRNA decay activator protein ZFP36L2 OS=Mus musculus OX=10090 GN=Zfp36l2 PE=1 SV=2	0.461265	0.147916	0	0.00080075	45.983	37.795	42.039									0.461265	0	0.00130364	42.039													0.444959	1.52475	0.00080075	45.983
P23949	127	P23949	P23949	mRNA decay activator protein ZFP36L2	Zfp36l2	sp|P23949|TISD_MOUSE mRNA decay activator protein ZFP36L2 OS=Mus musculus OX=10090 GN=Zfp36l2 PE=1 SV=2	0.789739	0.0354655	7.57026	9.41937e-06	75.646	62.589	75.646													0.789739	7.57026	9.41937e-06	75.646	0.503571	1.42026	0.00340754	41.76	0	0		#NUM!
P24452	341	P24452	P24452	Macrophage-capping protein	Capg	sp|P24452|CAPG_MOUSE Macrophage-capping protein OS=Mus musculus OX=10090 GN=Capg PE=1 SV=2	0.999998	6.48348e-08	58.2889	9.85225e-21	129.84	122.39	109.91	0.881018	11.9503	5.55474e-05	65.213	0.995285	24.1066	2.87817e-15	119.02	0.999779	37.0122	2.3313e-11	106.99	0.992105	23.5753	5.55474e-05	65.213	0.791344	9.52434	7.78228e-05	62.064	0.999942	42.5994	7.37483e-15	114.57	0.998732	29.3697	3.99688e-20	123.29	0.774449	9.49609	0.000219754	57.578	0.975369	18.0686	8.75542e-06	74.876
P24547	416	P24547	P24547	Inosine-5'-monophosphate dehydrogenase 2	Impdh2	sp|P24547|IMDH2_MOUSE Inosine-5'-monophosphate dehydrogenase 2 OS=Mus musculus OX=10090 GN=Impdh2 PE=1 SV=2	0.997744	0.00023012	29.0671	2.77112e-06	99.86	90.764	68.49	0.886518	11.8331	0.000657732	63.184	0.991055	23.1366	0.000647744	63.454	0.994786	25.2048	9.31909e-05	85.231	0.978504	19.4504	0.00443855	56.708	0.968208	17.5839	0.00444398	45.069	0.995842	26.4043	2.77112e-06	99.86					0.94998	15.4645	0.00282407	63.184
P24788	270	P24788	P24788	Cyclin-dependent kinase 11B	Cdk11b	sp|P24788|CD11B_MOUSE Cyclin-dependent kinase 11B OS=Mus musculus OX=10090 GN=Cdk11b PE=1 SV=2	0.824963	0.02787	6.73392	4.18945e-15	150.12	130.28	150.12									0.824963	6.73392	4.18945e-15	150.12
P24788	65	P24788	P24788	Cyclin-dependent kinase 11B	Cdk11b	sp|P24788|CD11B_MOUSE Cyclin-dependent kinase 11B OS=Mus musculus OX=10090 GN=Cdk11b PE=1 SV=2	0.871623	0.0184339	10.6192	0.000130319	84.468	73.522	66.246	0.573456	2.74057	0.000130319	84.468	0.470398	0	0.00837632	54.09	0.871623	10.6192	0.00148232	66.246	0.696995	5.49345	0.0373186	43.69	0.440367	0	0.00516728	60.55	0.440367	0	0.00289384	68.972	0.461199	1.28634	0.0191238	50.088	0.440367	0	0.0117186	49.988	0	0		#NUM!
P24788	47	P24788	P24788	Cyclin-dependent kinase 11B	Cdk11b	sp|P24788|CD11B_MOUSE Cyclin-dependent kinase 11B OS=Mus musculus OX=10090 GN=Cdk11b PE=1 SV=2	1	0	56.1768	0.000499288	90.412	42.853	90.412									1	56.1768	0.000499288	90.412	0	0		#NUM!
P24788	232	P24788	P24788	Cyclin-dependent kinase 11B	Cdk11b	sp|P24788|CD11B_MOUSE Cyclin-dependent kinase 11B OS=Mus musculus OX=10090 GN=Cdk11b PE=1 SV=2	0.5	0.121145	0	2.07075e-06	115.1	71.544	61.444					0.5	0	1.98658e-05	106.3					0.5	0	7.49884e-05	85.909	0.5	0	0.00226132	55.186	0.5	0	2.07075e-06	115.1					0.5	0	0.00153345	58.885
P24788	234	P24788	P24788	Cyclin-dependent kinase 11B	Cdk11b	sp|P24788|CD11B_MOUSE Cyclin-dependent kinase 11B OS=Mus musculus OX=10090 GN=Cdk11b PE=1 SV=2	0.677849	0.0606146	3.23073	2.07075e-06	115.1	71.544	73.726					0.5	0	1.98658e-05	106.3	0.677849	3.23073	0.00015355	80.534	0.5	0	7.49884e-05	85.909	0.5	0	0.00226132	55.186	0.5	0	2.07075e-06	115.1	0.66501	2.97797	0.000123822	81.448	0.5	0	0.00153345	58.885
P25206	672	P25206	P25206	DNA replication licensing factor MCM3	Mcm3	sp|P25206|MCM3_MOUSE DNA replication licensing factor MCM3 OS=Mus musculus OX=10090 GN=Mcm3 PE=1 SV=2	1	1.37719e-09	74.723	9.27047e-176	244.04	220.32	164.35	0.999842	38.8892	7.64802e-60	170.65	1	68.9427	5.43464e-144	224.21	0.999975	46.0185	9.27047e-176	244.04	1	74.723	4.07135e-67	164.35	1	69.9645	3.06392e-67	166.35	1	73.094	1.52768e-79	178.41	1	65.0965	2.60166e-107	193.08	0.999956	44.608	5.32402e-55	155.22	0.998645	29.8173	1.72278e-22	116.48
P25444	264	P25444	P25444	Small ribosomal subunit protein uS5	Rps2	sp|P25444|RS2_MOUSE Small ribosomal subunit protein uS5 OS=Mus musculus OX=10090 GN=Rps2 PE=1 SV=3	0.865153	0.0199043	10.3866	1.98251e-22	139.11	125.98	94.707					0.824675	7.22528	1.98251e-22	139.11					0.501704	1.81733	2.10507e-05	86.546	0.373736	0	0.00443108	50.053	0.30415	0	0.000836791	64.454	0.865153	10.3866	1.13824e-06	94.707	0.517061	3.5766	0.000134419	74.047	0.430497	0	0.000872905	63.827
P25444	281	P25444	P25444	Small ribosomal subunit protein uS5	Rps2	sp|P25444|RS2_MOUSE Small ribosomal subunit protein uS5 OS=Mus musculus OX=10090 GN=Rps2 PE=1 SV=3	0.807008	0.0313978	6.39022	0.000951482	77.062	67.058	53.237																					0.796223	6.60054	0.000951482	77.062
P25446	220	P25446	P25446	Tumor necrosis factor receptor superfamily member 6	Fas	sp|P25446|TNR6_MOUSE Tumor necrosis factor receptor superfamily member 6 OS=Mus musculus OX=10090 GN=Fas PE=1 SV=2	0.818495	0.0290153	9.1073	1.85738e-06	112.96	96.293	84.508	0.52012	2.43869	0.0210844	44.601	0.818495	9.1073	0.00385943	84.508	0.807628	8.75966	1.85738e-06	112.96									0.681325	4.21794	0.0251562	51.888	0.543654	2.98973	0.107051	52.966
P25799	940	P25799	P25799	Nuclear factor NF-kappa-B p105 subunit;Nuclear factor NF-kappa-B p50 subunit	Nfkb1	sp|P25799|NFKB1_MOUSE Nuclear factor NF-kappa-B p105 subunit OS=Mus musculus OX=10090 GN=Nfkb1 PE=1 SV=2	0.982903	0.00203638	17.643	3.84014e-27	141.97	120.72	141.97	0.444169	0	0.00218347	44.683	0.964025	14.3973	2.5805e-09	103.31	0.982903	17.643	3.84014e-27	141.97	0.639648	2.76498	2.62991e-05	78.428	0.677367	4.72229	0.000427695	55.177					0.27272	0	0.00151366	47.397	0.359887	0	0.000504253	52.185	0.459568	0	0.0128585	43.932
P25799	944	P25799	P25799	Nuclear factor NF-kappa-B p105 subunit;Nuclear factor NF-kappa-B p50 subunit	Nfkb1	sp|P25799|NFKB1_MOUSE Nuclear factor NF-kappa-B p105 subunit OS=Mus musculus OX=10090 GN=Nfkb1 PE=1 SV=2	0.27272	0.225147	0	0.00151366	47.397	38.465	47.397																									0.27272	0	0.00151366	47.397
P26039	1260	P26039	P26039	Talin-1	Tln1	sp|P26039|TLN1_MOUSE Talin-1 OS=Mus musculus OX=10090 GN=Tln1 PE=1 SV=2	0.525373	0.108599	0.76039	7.1751e-08	85.203	78.699	69.873					0.477411	0	2.15199e-07	83.198	0.493672	0	4.38278e-05	64.27	0.470857	0	4.22237e-05	69.755	0.384899	0	3.99722e-05	63.008	0.481815	0	2.99734e-05	69.094	0.477613	0	4.50405e-05	63.848	0.409105	0	0.000675714	46.772	0.450888	0	0.000385139	49.209
P26039	2040	P26039	P26039	Talin-1	Tln1	sp|P26039|TLN1_MOUSE Talin-1 OS=Mus musculus OX=10090 GN=Tln1 PE=1 SV=2	1	0	12.5174	0.000370385	106.32	82.947	47.712									1	52.2404	0.000370385	106.32													1	30.5722	0.00651546	59.116
P26039	728	P26039	P26039	Talin-1	Tln1	sp|P26039|TLN1_MOUSE Talin-1 OS=Mus musculus OX=10090 GN=Tln1 PE=1 SV=2	0.384461	0.180818	0	0.00593296	46.027	28.786	46.027																					0.333333	0	0.00686788	45.347	0.384461	0	0.00593296	46.027	0	0		#NUM!
P26039	729	P26039	P26039	Talin-1	Tln1	sp|P26039|TLN1_MOUSE Talin-1 OS=Mus musculus OX=10090 GN=Tln1 PE=1 SV=2	0.384461	0.180726	0	0.00593296	46.027	28.786	46.027																					0.333333	0	0.00686788	45.347	0.384461	0	0.00593296	46.027	0	0		#NUM!
P26041	576	P26041	P26041	Moesin	Msn	sp|P26041|MOES_MOUSE Moesin OS=Mus musculus OX=10090 GN=Msn PE=1 SV=3	1	0	87.1234	4.73358e-18	186.78	130.48	121.5	1	53.4696	4.73358e-18	186.78	1	92.201	0.00100911	150.27	1	121.503	0.000264829	148.94	1	111.309	3.40268e-07	166.07	1	68.7599	0.000777797	142.98	1	101.543	3.72854e-05	161.27	1	101.543	6.60754e-12	178.32	1	104.484	0.00063185	140.45	1	55.2486	0.000287693	154.05
P26041	74	P26041	P26041	Moesin	Msn	sp|P26041|MOES_MOUSE Moesin OS=Mus musculus OX=10090 GN=Msn PE=1 SV=3	1	0	76.4161	0.000222279	155.33	55.766	99.568	1	68.4357	0.00189774	103.08	1	84.0602	0.00324884	121.36	1	68.4357	0.00217101	89.9	1	84.0602	0.00163005	92.866	1	57.4767	0.0124676	75.416	1	76.0684	0.00209049	129.89	1	68.4357	0.0015513	96.229	1	64.6877	0.00147981	99.283	1	80.2395	0.00305134	106.62
P26231	641	P26231	P26231	Catenin alpha-1	Ctnna1	sp|P26231|CTNA1_MOUSE Catenin alpha-1 OS=Mus musculus OX=10090 GN=Ctnna1 PE=1 SV=1	1	1.1415e-16	133.358	0	456.44	436.08	456.44	0.981276	17.1956	5.72282e-26	150.59	1	107.756	0	450.85	1	132.125	0	432.57	1	64.9655	0	362.02	1	83.5004	0	430.63	1	92.5967	0	381.32	1	80.203	0	378.76	1	82.0266	0	390.9	1	77.7758	0	418.57
P26231;Q61301	652;651	P26231	P26231	Catenin alpha-1;Catenin alpha-2	Ctnna1;Ctnna2	sp|P26231|CTNA1_MOUSE Catenin alpha-1 OS=Mus musculus OX=10090 GN=Ctnna1 PE=1 SV=1;sp|Q61301|CTNA2_MOUSE Catenin alpha-2 OS=Mus musculus OX=10090 GN=Ctnna2 PE=1 SV=3	0.422186	0.163986	1.80454	5.23423e-19	122.44	113.57	122.44	0.422186	1.80454	5.23423e-19	122.44	0.408317	1.58577	1.20506e-07	95.319					0.416689	1.68389	4.65556e-10	103.71
P26231;Q61301	655;654	P26231	P26231	Catenin alpha-1;Catenin alpha-2	Ctnna1;Ctnna2	sp|P26231|CTNA1_MOUSE Catenin alpha-1 OS=Mus musculus OX=10090 GN=Ctnna1 PE=1 SV=1;sp|Q61301|CTNA2_MOUSE Catenin alpha-2 OS=Mus musculus OX=10090 GN=Ctnna2 PE=1 SV=3	0.905415	0.013631	10.2252	6.78222e-115	220.47	220.47	157.73	0.402632	0	0.0234522	45.614	0.44066	0	6.57186e-05	83.849	0.596446	2.79293	1.04648e-26	141.36	0.330308	0	0.00522941	61.942	0.658752	3.16796	6.8779e-62	173.25	0.689686	3.63237	6.78222e-115	220.47	0.679322	3.46984	1.053e-101	214.95	0.822191	6.89002	8.92108e-63	181.35	0.646991	3.2118	1.03528e-72	181.35
P26350	2	P26350	P26350	Prothymosin alpha;Prothymosin alpha, N-terminally processed;Thymosin alpha	Ptma	sp|P26350|PTMA_MOUSE Prothymosin alpha OS=Mus musculus OX=10090 GN=Ptma PE=1 SV=2	0.999963	2.73723e-06	44.6879	8.98499e-21	147.35	138.06	146.96	0.999844	38.8785	1.05763e-09	122.34	0.999949	44.0835	2.3289e-14	135.02	0.998868	29.8621	4.01016e-07	115.82					0.999963	44.6879	9.70707e-21	146.96	0.954144	15.61	4.68222e-10	127.71	0.998556	31.0101	2.27975e-05	100.45					0.98554	20.8535	1.99846e-06	109.84
P26350	9	P26350	P26350	Prothymosin alpha;Prothymosin alpha, N-terminally processed;Thymosin alpha	Ptma	sp|P26350|PTMA_MOUSE Prothymosin alpha OS=Mus musculus OX=10090 GN=Ptma PE=1 SV=2	0.524819	0.108786	0.514788	4.27948e-29	165.51	136.6	165.51					0.524819	0.514788	4.27948e-29	165.51									0.460599	0	1.26825e-07	119.96
P26350	10	P26350	P26350	Prothymosin alpha;Prothymosin alpha, N-terminally processed;Thymosin alpha	Ptma	sp|P26350|PTMA_MOUSE Prothymosin alpha OS=Mus musculus OX=10090 GN=Ptma PE=1 SV=2	0.86755	0.0193535	10.9386	3.59685e-15	141	112.68	141									0.74773	7.44715	5.96547e-11	137.93	0.86755	10.9386	3.59685e-15	141	0.460599	0	1.26825e-07	119.96	0.645064	3.78501	5.07338e-10	127.32	0.661923	3.67891	5.70474e-07	110.44	0.624882	3.59646	6.85975e-10	125.73
P26369	79	P26369	P26369	Splicing factor U2AF 65 kDa subunit	U2af2	sp|P26369|U2AF2_MOUSE Splicing factor U2AF 65 kDa subunit OS=Mus musculus OX=10090 GN=U2af2 PE=1 SV=3	1	0	99.844	4.459e-68	214.97	178.32	125.03	1	122.575	1.75643e-13	138.33	1	85.33	1.50126e-12	186.56	1	189.937	4.459e-68	214.54	1	72.063	6.30894e-39	188.53	1	207.654	1.3347e-16	214.97	1	96.3727	4.44748e-28	168.47	1	96.3727	3.94914e-28	168.91	1	157.802	6.52288e-28	166.62	1	66.6658	9.13445e-28	164.28
P26369	2	P26369	P26369	Splicing factor U2AF 65 kDa subunit	U2af2	sp|P26369|U2AF2_MOUSE Splicing factor U2AF 65 kDa subunit OS=Mus musculus OX=10090 GN=U2af2 PE=1 SV=3	1	0	40.7118	3.09559e-103	231.06	216.36	113.29	1	120.885	3.43569e-68	195.56	1	32.6251	1.68639e-60	189.48	1	113.835	9.32385e-54	174.2	1	36.9875	4.20953e-60	184.7	1	31.4286	3.26167e-05	155.84	1	101.158	4.00889e-78	207.82	1	127.539	9.97353e-103	226.45	1	47.5603	2.15948e-68	198.24	1	40.7118	4.6827e-68	192.94
P26645	138	P26645	P26645	Myristoylated alanine-rich C-kinase substrate	Marcks	sp|P26645|MARCS_MOUSE Myristoylated alanine-rich C-kinase substrate OS=Mus musculus OX=10090 GN=Marcks PE=1 SV=2	0.913145	0.0121361	11.1087	2.24883e-37	162.7	154.6	162.29	0.382029	2.6825	0.0851365	41.704	0.908405	11.0367	1.78108e-30	156.96	0.909288	11.0737	2.24883e-37	162.7	0.795796	6.90207	7.90962e-12	127.18	0.574525	3.49245	0.000182931	92.939	0.913145	11.1087	1.11488e-32	162.29	0.816949	7.3875	7.85638e-17	140.6	0.705638	8.53668	0.0211952	53.124
P26645	141	P26645	P26645	Myristoylated alanine-rich C-kinase substrate	Marcks	sp|P26645|MARCS_MOUSE Myristoylated alanine-rich C-kinase substrate OS=Mus musculus OX=10090 GN=Marcks PE=1 SV=2	0.441744	0.156545	0	0.000242204	77.221	56.97	77.221	0	0		#NUM!	0	0		#NUM!					0	0		#NUM!	0	0		#NUM!	0	0		#NUM!					0	0		#NUM!
P26645	152	P26645	P26645	Myristoylated alanine-rich C-kinase substrate	Marcks	sp|P26645|MARCS_MOUSE Myristoylated alanine-rich C-kinase substrate OS=Mus musculus OX=10090 GN=Marcks PE=1 SV=2	1	0	48.5609	0.0092486	77.288	62.608	71.221					1	22.4861	0.0130027	51.841	0	0		#NUM!									1	19.6153	0.0121397	53.569	1	22.4861	0.0141369	63.694	0	0		#NUM!	1	52.1929	0.0218576	68.786
P26645	156	P26645	P26645	Myristoylated alanine-rich C-kinase substrate	Marcks	sp|P26645|MARCS_MOUSE Myristoylated alanine-rich C-kinase substrate OS=Mus musculus OX=10090 GN=Marcks PE=1 SV=2	1	0	48.5609	1.45942e-10	152.04	117.85	71.221	0.999999	60.0056	0.0004512	127.42	1	22.4861	0.000171406	152.04	1	73.055	0.000386414	130.01	1	91.3464	1.45942e-10	144.55	0.999997	55.0317	0.000483504	117.02	1	19.6153	7.71836e-05	133.42	1	22.4861	9.31989e-09	128.96	1	70.9272	0.000361917	130.98	1	52.1929	0.000391113	129.82
P26645	160	P26645	P26645	Myristoylated alanine-rich C-kinase substrate	Marcks	sp|P26645|MARCS_MOUSE Myristoylated alanine-rich C-kinase substrate OS=Mus musculus OX=10090 GN=Marcks PE=1 SV=2	0.865414	0.019819	10.3501	0.0120274	44.511	31.11	44.511	0	0		#NUM!	0	0		#NUM!	0.865414	10.3501	0.0120274	44.511	0	0		#NUM!	0	0		#NUM!	0	0		#NUM!	0	0		#NUM!
P26645	163	P26645	P26645	Myristoylated alanine-rich C-kinase substrate	Marcks	sp|P26645|MARCS_MOUSE Myristoylated alanine-rich C-kinase substrate OS=Mus musculus OX=10090 GN=Marcks PE=1 SV=2	1	6.79884e-11	85.6698	1.94368e-11	155.5	112.63	142.92	1	64.5663	0.000217126	155.5	1	65.0681	5.61814e-09	133.23	1	69.7991	0.00283881	124.33	1	79.0514	2.02404e-11	143.46	1	75.9074	0.000348699	130.53	1	72.3395	3.67946e-09	134.59	1	85.6698	9.31989e-09	143.93	0.99999	49.8885	0.000763878	107.79	1	72.4025	3.28298e-05	130.53
P26687	68	P26687	P26687	Twist-related protein 1	Twist1	sp|P26687|TWST1_MOUSE Twist-related protein 1 OS=Mus musculus OX=10090 GN=Twist1 PE=1 SV=1	0.842098	0.0240672	8.01891	9.88548e-06	66.097	58.272	49.038													0.842098	8.01891	0.000236477	49.038					0.604918	3.86972	0.000162165	50.224
P27546	667	P27546	P27546	Microtubule-associated protein 4	Map4	sp|P27546|MAP4_MOUSE Microtubule-associated protein 4 OS=Mus musculus OX=10090 GN=Map4 PE=1 SV=3	1	2.49917e-10	79.9275	8.4584e-161	232.2	217.65	209.24	0.999838	38.5219	3.49666e-62	154.45	0.999994	52.6061	2.08608e-118	197.01	0.999997	56.1721	8.4584e-161	232.2	0.999994	52.6697	1.17121e-134	204.48	0.999823	37.9287	2.06539e-104	192.07	1	79.9275	1.03379e-148	222.95	1	71.4344	7.58241e-89	214.65	0.99947	33.7508	1.26117e-134	203.83	0.999125	31.7942	2.52303e-74	162.58
P27546	254	P27546	P27546	Microtubule-associated protein 4	Map4	sp|P27546|MAP4_MOUSE Microtubule-associated protein 4 OS=Mus musculus OX=10090 GN=Map4 PE=1 SV=3	0.57671	0.0896414	5.37449	9.84034e-19	106.93	100.01	101.59					0.441368	2.21808	1.46293e-08	80.93	0.57671	5.37449	9.84034e-19	106.93	0.357567	2.01601	1.89329e-09	83.834	0	0		#NUM!	0.344165	2.12178	2.3138e-09	82.126	0.300215	2.05738	5.1182e-13	91.599
P27546	256	P27546	P27546	Microtubule-associated protein 4	Map4	sp|P27546|MAP4_MOUSE Microtubule-associated protein 4 OS=Mus musculus OX=10090 GN=Map4 PE=1 SV=3	0.2668	0.227576	0	5.21399e-10	83.265	74.762	82.384																	0	0		#NUM!
P27546	785	P27546	P27546	Microtubule-associated protein 4	Map4	sp|P27546|MAP4_MOUSE Microtubule-associated protein 4 OS=Mus musculus OX=10090 GN=Map4 PE=1 SV=3	0.996787	0.000342574	26.0436	2.37609e-30	155.17	133.17	155.17	0.99332	22.384	3.65105e-16	135.14	0.976887	16.2672	7.80736e-17	140.61	0.996346	26.4287	1.46236e-11	123.1	0.988693	19.6354	2.01635e-22	145.52	0.972295	16.6233	6.86791e-07	107.61	0.996787	26.0436	2.37609e-30	155.17	0.968499	15.3947	2.24378e-09	119.62	0.959953	13.8266	8.41923e-09	113.38	0.980651	17.4314	2.54077e-09	119.32
P27546	475	P27546	P27546	Microtubule-associated protein 4	Map4	sp|P27546|MAP4_MOUSE Microtubule-associated protein 4 OS=Mus musculus OX=10090 GN=Map4 PE=1 SV=3	0.999988	6.51214e-07	50.2963	3.90777e-17	108.88	102.72	76.311	0.688055	7.44616	0.000158086	57.351	0.999828	38.606	1.41626e-11	92.632	0.999947	44.3767	3.60946e-12	99.34	0.992508	23.4874	1.45891e-05	69.356	0.938505	14.992	3.94583e-06	76.237	0.999988	50.2963	3.90777e-17	108.88	0.999606	35.4936	1.46308e-11	95.255	0.772414	8.09259	0.000549809	50.144	0.896264	12.3205	4.10292e-05	65.581
P27546	517	P27546	P27546	Microtubule-associated protein 4	Map4	sp|P27546|MAP4_MOUSE Microtubule-associated protein 4 OS=Mus musculus OX=10090 GN=Map4 PE=1 SV=3	0.999525	3.93417e-05	33.238	3.02622e-105	174.6	164.27	131.66	0.974709	16.3971	1.16215e-13	97.274	0.995507	23.4941	2.16091e-72	160.07	0.999451	32.6195	2.03114e-45	164.68	0.987983	20.0157	3.31153e-45	133.15	0.996595	24.8602	1.58307e-35	130.52	0.995175	23.86	5.74223e-88	169.7	0.998238	27.5543	8.90281e-46	139.69	0.953678	13.7424	2.03114e-45	134.1	0.916232	10.6165	1.81853e-09	81.831
P27546	598	P27546	P27546	Microtubule-associated protein 4	Map4	sp|P27546|MAP4_MOUSE Microtubule-associated protein 4 OS=Mus musculus OX=10090 GN=Map4 PE=1 SV=3	0.664295	0.0647564	3.16168	0.00265988	83.633	55.97	64.04									0.664295	3.16168	0.00265988	64.04													0.575366	2.87113	0.0952646	46.89
P27546	901	P27546	P27546	Microtubule-associated protein 4	Map4	sp|P27546|MAP4_MOUSE Microtubule-associated protein 4 OS=Mus musculus OX=10090 GN=Map4 PE=1 SV=3	0.951139	0.00618962	14.9575	6.4162e-11	145.31	108.63	104.24	0.887197	9.33368	7.40019e-09	127.56	0.784881	5.65551	0.000102425	100.04	0.776665	5.54153	1.07542e-08	125.54	0.701117	3.73142	6.9885e-05	105.66	0.776102	5.66317	2.43011e-06	119.39	0.779798	5.65718	9.63878e-05	102.97	0.778911	5.6156	6.4162e-11	145.31					0.752279	5.51069	0.00256352	71.176
P27546	512	P27546	P27546	Microtubule-associated protein 4	Map4	sp|P27546|MAP4_MOUSE Microtubule-associated protein 4 OS=Mus musculus OX=10090 GN=Map4 PE=1 SV=3	0.299258	0.216314	0	4.68151e-06	52.627	45.369	52.627	0.299258	0	8.3103e-05	52.627	0	0		#NUM!									0.249454	0	4.68151e-06	50.94
P27546	1046	P27546	P27546	Microtubule-associated protein 4	Map4	sp|P27546|MAP4_MOUSE Microtubule-associated protein 4 OS=Mus musculus OX=10090 GN=Map4 PE=1 SV=3	1	0	91.0784	2.63003e-16	129.36	116.83	129.36					1	31.6191	0.00409769	44.729													1	84.6635	4.88836e-06	104.76	1	49.9668	3.72329e-08	110.56
P27659	13	P27659	P27659	Large ribosomal subunit protein uL3	Rpl3	sp|P27659|RL3_MOUSE Large ribosomal subunit protein uL3 OS=Mus musculus OX=10090 GN=Rpl3 PE=1 SV=3	1	0	28.2336	0.00869434	83.862	64.1	53.751																	1	27.0884	0.0394854	61.161	1	37.7713	0.0133097	63.184									1	50.1303	0.00869434	83.862
P28028	346	P28028	P28028	Serine/threonine-protein kinase B-raf	Braf	sp|P28028|BRAF_MOUSE Serine/threonine-protein kinase B-raf OS=Mus musculus OX=10090 GN=Braf PE=1 SV=4	0.311794	0.211277	0	1.04215e-06	76.691	68.072	73.655	0	0		#NUM!	0	0		#NUM!	0.289554	0	5.0441e-05	62.683									0.311794	0	1.68036e-06	73.655					0.300361	0	1.04215e-06	76.691
P28028	347	P28028	P28028	Serine/threonine-protein kinase B-raf	Braf	sp|P28028|BRAF_MOUSE Serine/threonine-protein kinase B-raf OS=Mus musculus OX=10090 GN=Braf PE=1 SV=4	0.311794	0.211182	0	1.04215e-06	76.691	68.072	73.655	0	0		#NUM!	0	0		#NUM!	0.289554	0	5.0441e-05	62.683									0.311794	0	1.68036e-06	73.655					0.300361	0	1.04215e-06	76.691
P28028	348	P28028	P28028	Serine/threonine-protein kinase B-raf	Braf	sp|P28028|BRAF_MOUSE Serine/threonine-protein kinase B-raf OS=Mus musculus OX=10090 GN=Braf PE=1 SV=4	0.78629	0.0365186	8.70936	1.67758e-14	109.26	101.17	109.26	0.496122	3.05433	1.67581e-06	73.676	0.78629	8.70936	1.67758e-14	109.26	0.761352	8.05792	1.56319e-10	96.887	0.484561	2.86659	7.59255e-09	90.097	0.437424	2.25369	7.66987e-06	69.248	0.311794	0	1.68036e-06	73.655	0.698692	6.88176	6.72515e-07	78.45					0.46527	2.58426	4.97615e-08	81.341
P28028	431	P28028	P28028	Serine/threonine-protein kinase B-raf	Braf	sp|P28028|BRAF_MOUSE Serine/threonine-protein kinase B-raf OS=Mus musculus OX=10090 GN=Braf PE=1 SV=4	0.756009	0.0422485	4.98683	1.16543e-07	93.093	77.501	90.778	0.595379	1.81437	0.000450741	53.865	0.643347	2.56266	1.24361e-07	92.518	0.559585	1.05172	4.92307e-05	73.574	0.56614	1.16272	4.3615e-05	74.763	0.57788	1.3872	8.41825e-06	84.602	0.620234	2.1526	6.72384e-05	70.533	0.623862	2.21368	3.27981e-05	77.053	0.612718	2.03666	6.72384e-05	69.619
P28028	432	P28028	P28028	Serine/threonine-protein kinase B-raf	Braf	sp|P28028|BRAF_MOUSE Serine/threonine-protein kinase B-raf OS=Mus musculus OX=10090 GN=Braf PE=1 SV=4	0.49731	0.129478	0	5.81916e-05	71.678	61.865	71.678
P28028	714	P28028	P28028	Serine/threonine-protein kinase B-raf	Braf	sp|P28028|BRAF_MOUSE Serine/threonine-protein kinase B-raf OS=Mus musculus OX=10090 GN=Braf PE=1 SV=4	0.999997	1.43777e-07	54.9336	6.89936e-13	175.93	76.246	151.83	0.999947	42.7565	0.000260497	119.53	0.999931	41.6494	0.000199429	125.75	0.999438	32.5881	0.000255656	140.16	0.999987	48.7334	1.94072e-05	153.97	0.993708	22.0087	0.000291247	108.43	0.999984	47.8844	6.89936e-13	175.93	0.999967	44.8812	0.000201192	145.25	0.998481	28.1977	0.00028205	117.7	0.999181	31.2826	0.000309359	109.42
P28033	173	P28033	P28033	CCAAT/enhancer-binding protein beta	Cebpb	sp|P28033|CEBPB_MOUSE CCAAT/enhancer-binding protein beta OS=Mus musculus OX=10090 GN=Cebpb PE=1 SV=1	0.0779157	0.258885	0	0.000632381	41.764	30.343	41.764
P28033	174	P28033	P28033	CCAAT/enhancer-binding protein beta	Cebpb	sp|P28033|CEBPB_MOUSE CCAAT/enhancer-binding protein beta OS=Mus musculus OX=10090 GN=Cebpb PE=1 SV=1	0.0779157	0.258764	0	0.000632381	41.764	30.343	41.764
P28033	176	P28033	P28033	CCAAT/enhancer-binding protein beta	Cebpb	sp|P28033|CEBPB_MOUSE CCAAT/enhancer-binding protein beta OS=Mus musculus OX=10090 GN=Cebpb PE=1 SV=1	0.0779157	0.258524	0	0.000632381	41.764	30.343	41.764
P28033	178	P28033	P28033	CCAAT/enhancer-binding protein beta	Cebpb	sp|P28033|CEBPB_MOUSE CCAAT/enhancer-binding protein beta OS=Mus musculus OX=10090 GN=Cebpb PE=1 SV=1	0.0779157	0.258403	0	0.000632381	41.764	30.343	41.764
P28033	180	P28033	P28033	CCAAT/enhancer-binding protein beta	Cebpb	sp|P28033|CEBPB_MOUSE CCAAT/enhancer-binding protein beta OS=Mus musculus OX=10090 GN=Cebpb PE=1 SV=1	0.0779157	0.258283	0	0.000632381	41.764	30.343	41.764
P28033	181	P28033	P28033	CCAAT/enhancer-binding protein beta	Cebpb	sp|P28033|CEBPB_MOUSE CCAAT/enhancer-binding protein beta OS=Mus musculus OX=10090 GN=Cebpb PE=1 SV=1	0.0779157	0.258162	0	0.000632381	41.764	30.343	41.764
P28033	182	P28033	P28033	CCAAT/enhancer-binding protein beta	Cebpb	sp|P28033|CEBPB_MOUSE CCAAT/enhancer-binding protein beta OS=Mus musculus OX=10090 GN=Cebpb PE=1 SV=1	0.0779157	0.257921	0	0.000632381	41.764	30.343	41.764
P28033	183	P28033	P28033	CCAAT/enhancer-binding protein beta	Cebpb	sp|P28033|CEBPB_MOUSE CCAAT/enhancer-binding protein beta OS=Mus musculus OX=10090 GN=Cebpb PE=1 SV=1	0.0779157	0.258644	0	0.000632381	41.764	30.343	41.764
P28033	184	P28033	P28033	CCAAT/enhancer-binding protein beta	Cebpb	sp|P28033|CEBPB_MOUSE CCAAT/enhancer-binding protein beta OS=Mus musculus OX=10090 GN=Cebpb PE=1 SV=1	0.0779157	0.259005	0	0.000632381	41.764	30.343	41.764
P28667	182	P28667	P28667	MARCKS-related protein	Marcksl1	sp|P28667|MRP_MOUSE MARCKS-related protein OS=Mus musculus OX=10090 GN=Marcksl1 PE=1 SV=2	0.37692	0.183871	0	1.80915e-33	103.92	95.811	103.92	0.31826	0	6.832e-16	80.353	0.33468	0	3.9223e-10	63.019	0.266128	0	3.76356e-10	64.221	0.249987	0	1.93029e-05	47.625									0.276279	0	3.00678e-16	80.941	0.211116	0	4.03262e-06	50.49	0.283816	0	1.87811e-07	59.301
P28667	185	P28667	P28667	MARCKS-related protein	Marcksl1	sp|P28667|MRP_MOUSE MARCKS-related protein OS=Mus musculus OX=10090 GN=Marcksl1 PE=1 SV=2	0.31826	0.209294	0	3.00678e-16	80.941	76.128	80.353	0.31826	0	6.832e-16	80.353					0.266128	0	3.76356e-10	64.221	0.249987	0	1.93029e-05	47.625									0.276279	0	3.00678e-16	80.941	0.211116	0	4.03262e-06	50.49	0.283816	0	1.87811e-07	59.301
P28667	104	P28667	P28667	MARCKS-related protein	Marcksl1	sp|P28667|MRP_MOUSE MARCKS-related protein OS=Mus musculus OX=10090 GN=Marcksl1 PE=1 SV=2	0.999996	1.77897e-07	53.9964	0.00282892	142.43	81.837	142.43	0.999885	39.3869	0.00258692	105.2	0.999675	34.8732	0.00260071	136.63	0.999872	38.9238	0.00260071	136.63	0.999929	41.4588	0.00282892	137.98	0.999971	45.4132	0.00260071	136.63	0.999828	37.64	0.00260071	136.63	0.999996	53.9964	0.00342454	142.43	0.999944	42.5528	0.00343293	107.79	0.999721	35.5458	0.00294511	138.66
P28741	689	P28741	P28741	Kinesin-like protein KIF3A	Kif3a	sp|P28741|KIF3A_MOUSE Kinesin-like protein KIF3A OS=Mus musculus OX=10090 GN=Kif3a PE=1 SV=2	0.675743	0.0613921	3.2691	0.000429268	104.24	87.219	104.24
P28867	298	P28867	P28867	Protein kinase C delta type;Protein kinase C delta type regulatory subunit;Protein kinase C delta type catalytic subunit	Prkcd	sp|P28867|KPCD_MOUSE Protein kinase C delta type OS=Mus musculus OX=10090 GN=Prkcd PE=1 SV=3	0.612763	0.0782295	2.80629	9.27433e-18	141.6	100.74	130.95	0.397401	0	0.000608681	77.13									0.4767	2.11813	1.44362e-09	117.78	0.398512	0	7.56316e-05	91.518	0.408559	0	3.21982e-09	112.74					0.489197	2.39172	9.27433e-18	141.6
P28867	299	P28867	P28867	Protein kinase C delta type;Protein kinase C delta type regulatory subunit;Protein kinase C delta type catalytic subunit	Prkcd	sp|P28867|KPCD_MOUSE Protein kinase C delta type OS=Mus musculus OX=10090 GN=Prkcd PE=1 SV=3	0.680137	0.0599947	3.41422	4.37743e-18	139.08	97.529	139.08	0.397401	0	0.000608681	77.13													0.398512	0	7.56316e-05	91.518	0.408559	0	3.21982e-09	112.74									0.63117	3.23156	3.45984e-12	123.63
P29341;Q6PHQ9	51;51	P29341;Q6PHQ9	P29341	Polyadenylate-binding protein 1;Polyadenylate-binding protein	Pabpc1;Pabpc4	sp|P29341|PABP1_MOUSE Polyadenylate-binding protein 1 OS=Mus musculus OX=10090 GN=Pabpc1 PE=1 SV=2;tr|Q6PHQ9|Q6PHQ9_MOUSE Polyadenylate-binding protein OS=Mus musculus OX=10090 GN=Pabpc4 PE=1 SV=1	0.899876	0.0146449	9.92893	2.11729e-05	97.579	76.626	97.579
P29533	165	P29533	P29533	Vascular cell adhesion protein 1;Soluble Vascular Cell Adhesion Molecule-1	Vcam1	sp|P29533|VCAM1_MOUSE Vascular cell adhesion protein 1 OS=Mus musculus OX=10090 GN=Vcam1 PE=1 SV=1	0.463812	0.146297	0	0.00628997	45.363	37.665	45.363	0	0		#NUM!																					0	0		#NUM!
P29533	166	P29533	P29533	Vascular cell adhesion protein 1;Soluble Vascular Cell Adhesion Molecule-1	Vcam1	sp|P29533|VCAM1_MOUSE Vascular cell adhesion protein 1 OS=Mus musculus OX=10090 GN=Vcam1 PE=1 SV=1	0.911814	0.0123185	11.6661	0.00125387	115.33	95.685	115.33	0	0		#NUM!	0.692361	3.63203	0.0297704	52.193	0.911814	11.6661	0.00125387	115.33	0.850261	10.236	0.0232491	55.839	0.780099	7.7812	0.0700018	49.025	0.693326	3.64563	0.0158052	60	0	0		#NUM!	0.692361	3.63203	0.0234001	55.754
P30285	300	P30285	P30285	Cyclin-dependent kinase 4	Cdk4	sp|P30285|CDK4_MOUSE Cyclin-dependent kinase 4 OS=Mus musculus OX=10090 GN=Cdk4 PE=1 SV=1	0.999998	5.0613e-08	59.1925	4.07731e-30	142.74	127.86	138.81					0.999995	53.5059	4.07731e-30	142.74	0.986795	20.4836	4.19518e-07	110.77	0.963474	15.8747	1.84132e-05	101.36					0.999697	36.2891	3.2169e-11	124.09	0.870512	10.8247	0.0058335	47.204	0.94642	14.005	0.00299671	52.185
P30415	379	P30415	P30415	NK-tumor recognition protein	Nktr	sp|P30415|NKTR_MOUSE NK-tumor recognition protein OS=Mus musculus OX=10090 GN=Nktr PE=1 SV=4	0.966929	0.00404569	16.1374	0.0023183	59.68	48.635	59.68									0.916156	11.3837	0.0130556	40.242					0	0		#NUM!	0.966929	16.1374	0.0023183	59.68	0.834985	8.10703	0.00323693	55.213
P30415	468	P30415	P30415	NK-tumor recognition protein	Nktr	sp|P30415|NKTR_MOUSE NK-tumor recognition protein OS=Mus musculus OX=10090 GN=Nktr PE=1 SV=4	0.427319	0.162343	0.884435	0.000749942	74.12	63.839	40.349	0.376794	0	0.00427936	49.463	0.419177	0	0.00158108	60.764																	0.373113	0	0.00243838	60.209					0.407095	0	0.00099946	74.12
P30415	470	P30415	P30415	NK-tumor recognition protein	Nktr	sp|P30415|NKTR_MOUSE NK-tumor recognition protein OS=Mus musculus OX=10090 GN=Nktr PE=1 SV=4	0.443339	0.156003	2.02175	0.000749942	74.12	63.839	61.167	0.376794	0	0.00427936	49.463	0.419177	0	0.00158108	60.764	0.443339	2.02175	0.00206491	61.167					0.384742	0.551099	0.0109367	47.09					0.373113	0	0.00243838	60.209					0.407095	0	0.00099946	74.12
P30999	288	P30999	P30999	Catenin delta-1	Ctnnd1	sp|P30999|CTND1_MOUSE Catenin delta-1 OS=Mus musculus OX=10090 GN=Ctnnd1 PE=1 SV=2	0.596439	0.0827619	2.89937	3.03774e-13	93.505	90.174	62.833					0.151037	0.0334942	0.00110515	42.828	0.596439	2.89937	9.69129e-06	62.833									0.514535	0.49587	3.03774e-13	93.505	0.436218	0.326444	2.04467e-07	75.515	0.324432	0.230126	3.51654e-05	56.366
P30999	349	P30999	P30999	Catenin delta-1	Ctnnd1	sp|P30999|CTND1_MOUSE Catenin delta-1 OS=Mus musculus OX=10090 GN=Ctnnd1 PE=1 SV=2	1	3.4461e-10	78.4608	3.49311e-43	205.02	96.04	153.05	0.999172	31.0402	3.16013e-06	111.83	0.999955	43.4584	1.17762e-11	148.69	0.999994	53.5162	2.87692e-15	164.93	1	63.7512	2.05201e-15	171.26	1	64.4799	3.49311e-43	205.02	0.999977	46.4569	3.86464e-09	124.81	1	75.969	4.50402e-26	183.28	1	78.4608	2.26676e-12	155.61	1	65.8535	9.78463e-12	155.88
P30999	352	P30999	P30999	Catenin delta-1	Ctnnd1	sp|P30999|CTND1_MOUSE Catenin delta-1 OS=Mus musculus OX=10090 GN=Ctnnd1 PE=1 SV=2	1	3.12262e-15	124.433	4.50402e-26	183.28	100.87	183.28	0.999993	51.427	3.16013e-06	111.83	1	95.4264	1.17762e-11	148.69	1	95.6693	2.87692e-15	164.93	1	115.409	2.05201e-15	167.09	1	66.3486	2.92932e-05	92.151	1	86.611	3.86464e-09	124.81	1	124.433	4.50402e-26	183.28	1	117.071	2.26676e-12	153.05	1	96.9449	2.02474e-11	135.5
P30999	230	P30999	P30999	Catenin delta-1	Ctnnd1	sp|P30999|CTND1_MOUSE Catenin delta-1 OS=Mus musculus OX=10090 GN=Ctnnd1 PE=1 SV=2	0.923337	0.0104652	12.9985	2.65679e-135	250.47	207.9	221.79	0.645582	3.29006	1.55662e-36	157.88	0.923337	12.9985	9.52558e-91	221.79	0.83192	7.22842	8.92428e-79	209.25	0.848205	9.77903	5.71815e-90	215.64	0.826016	6.81325	3.31809e-28	142.45	0.867598	8.87837	1.01809e-68	195.89	0.833504	7.46625	9.39298e-61	186.94	0.784391	6.14769	3.04448e-16	123.59	0.856271	8.19471	6.85109e-36	156.11
P30999	864	P30999	P30999	Catenin delta-1	Ctnnd1	sp|P30999|CTND1_MOUSE Catenin delta-1 OS=Mus musculus OX=10090 GN=Ctnnd1 PE=1 SV=2	0.262951	0.228744	1.73036	0.000419001	51.348	42.747	51.348																																	0.262951	1.73036	0.000419001	51.348
P30999	268	P30999	P30999	Catenin delta-1	Ctnnd1	sp|P30999|CTND1_MOUSE Catenin delta-1 OS=Mus musculus OX=10090 GN=Ctnnd1 PE=1 SV=2	0.954758	0.0057639	13.2435	1.15787e-06	120.77	101.16	120.77					0.896528	9.37739	2.00883e-06	115.57	0.897135	9.40589	2.8151e-05	106.16	0.954758	13.2435	1.15787e-06	120.77	0.680208	3.27774	0.00219845	72.652	0.942239	12.1253	0.000134099	95.618	0.880087	8.65659	4.21774e-05	103.08	0.680349	3.28055	0.00677493	65.5	0.87485	8.44504	0.00651874	65.842
P30999	269	P30999	P30999	Catenin delta-1	Ctnnd1	sp|P30999|CTND1_MOUSE Catenin delta-1 OS=Mus musculus OX=10090 GN=Ctnnd1 PE=1 SV=2	0.674161	0.06217	3.15761	0.0123083	59.426	45.834	59.426																					0.674161	3.15761	0.0123083	59.426
P31324	83	P31324	P31324	cAMP-dependent protein kinase type II-beta regulatory subunit	Prkar2b	sp|P31324|KAP3_MOUSE cAMP-dependent protein kinase type II-beta regulatory subunit OS=Mus musculus OX=10090 GN=Prkar2b PE=1 SV=3	1	0	5.57181	2.30793e-05	58.565	53.299	56.435									1	8.52816	2.30793e-05	58.565
P31324	85	P31324	P31324	cAMP-dependent protein kinase type II-beta regulatory subunit	Prkar2b	sp|P31324|KAP3_MOUSE cAMP-dependent protein kinase type II-beta regulatory subunit OS=Mus musculus OX=10090 GN=Prkar2b PE=1 SV=3	1	0	5.57181	2.30793e-05	58.565	53.299	56.435									1	8.52816	2.30793e-05	58.565
P31324	112	P31324	P31324	cAMP-dependent protein kinase type II-beta regulatory subunit	Prkar2b	sp|P31324|KAP3_MOUSE cAMP-dependent protein kinase type II-beta regulatory subunit OS=Mus musculus OX=10090 GN=Prkar2b PE=1 SV=3	1	2.56484e-09	70.6062	2.4076e-270	297.99	279.58	297.99	0.999985	48.2442	2.14145e-115	214.17	1	66.2724	5.18773e-222	282.79	0.999999	59.3888	1.82295e-160	245.41	1	65.3475	3.73883e-199	265.62	0.999947	42.7772	2.14474e-160	244.01	1	70.3924	4.80178e-221	275.2	0.999999	61.5161	2.23973e-221	279.74	0.999968	45.0008	3.88359e-104	208.39	0.999937	42.0339	1.87648e-95	202.43
P31750	122	P31750	P31750	RAC-alpha serine/threonine-protein kinase	Akt1	sp|P31750|AKT1_MOUSE RAC-alpha serine/threonine-protein kinase OS=Mus musculus OX=10090 GN=Akt1 PE=1 SV=2	0.39608	0.175561	0.381822	0.00152199	56.055	46.65	56.055					0.39608	0.381822	0.00152199	56.055
P31750	124	P31750	P31750	RAC-alpha serine/threonine-protein kinase	Akt1	sp|P31750|AKT1_MOUSE RAC-alpha serine/threonine-protein kinase OS=Mus musculus OX=10090 GN=Akt1 PE=1 SV=2	0.784799	0.0369892	7.57729	2.63629e-07	83.701	79.433	83.701					0.493356	2.18848	0.000256821	56.529	0.598296	4.18943	0.000287555	52.541	0.494121	2.25628	0.00124766	48.315									0.784799	7.57729	2.63629e-07	83.701					0.764562	7.00865	0.000272608	55.383
P31786	2	P31786	P31786	Acyl-CoA-binding protein	Dbi	sp|P31786|ACBP_MOUSE Acyl-CoA-binding protein OS=Mus musculus OX=10090 GN=Dbi PE=1 SV=2	1	0	13.6551	0.00404343	48.477	39.878	48.477
P33174	802	P33174	P33174	Chromosome-associated kinesin KIF4	Kif4	sp|P33174|KIF4_MOUSE Chromosome-associated kinesin KIF4 OS=Mus musculus OX=10090 GN=Kif4 PE=1 SV=3	0.775671	0.0379491	6.7304	7.81271e-09	96.903	85.696	96.54	0	0		#NUM!	0.77383	7.59085	5.61031e-06	77.19	0.657223	5.83038	0.00328923	51.857	0.634652	3.20818	4.44816e-05	66.017	0.703383	6.56288	4.64719e-06	78.202	0.663103	4.17274	7.81271e-09	96.903	0.527836	3.11425	7.08926e-05	67.614	0.752003	7.45168	0.000136097	59.359	0.638815	5.30271	0.00439149	49.25
P33215	379	P33215	P33215	Protein NEDD1	Nedd1	sp|P33215|NEDD1_MOUSE Protein NEDD1 OS=Mus musculus OX=10090 GN=Nedd1 PE=1 SV=2	0.944947	0.00700677	15.3565	0.00059579	105.66	69.074	105.66	0.720851	7.13449	0.00377203	80.17																	0.944947	15.3565	0.00059579	105.66									0.582766	3.31758	0.0605347	53.6
P33609	215	P33609	P33609	DNA polymerase alpha catalytic subunit	Pola1	sp|P33609|DPOLA_MOUSE DNA polymerase alpha catalytic subunit OS=Mus musculus OX=10090 GN=Pola1 PE=1 SV=2	0.980772	0.00219527	17.0763	0.00319753	71.548	60.643	65.805	0	0		#NUM!	0.917018	10.4339	0.0197515	51.546	0.980772	17.0763	0.00538807	65.805	0	0		#NUM!
P33611	126	P33611	P33611	DNA polymerase alpha subunit B	Pola2	sp|P33611|DPOA2_MOUSE DNA polymerase alpha subunit B OS=Mus musculus OX=10090 GN=Pola2 PE=1 SV=2	0.933189	0.00892269	14.0355	0.00480388	72.089	50.043	71.806	0.742293	6.2619	0.0181401	54.524	0	0		#NUM!	0.615617	2.73858	0.0472798	44.426	0.933189	14.0355	0.00492136	71.806	0.809707	9.61192	0.0139083	56.122	0.834549	10.1005	0.0173266	55.261	0.842756	10.5438	0.00480388	72.089	0.454073	2.11535	0.00891039	47.915	0.826344	10.1005	0.00728125	67.456
P34152	840	P34152	P34152	Focal adhesion kinase 1	Ptk2	sp|P34152|FAK1_MOUSE Focal adhesion kinase 1 OS=Mus musculus OX=10090 GN=Ptk2 PE=1 SV=4	1	0	21.3753	0.00130736	69.864	61.134	52.576	1	7.42856	0.0139932	44.616									1	22.9111	0.0134459	45.28	1	20.1199	0.0150091	43.382	1	37.9465	0.00130736	69.864	1	29.4191	0.0049658	58.674	1	18.6889	0.00828847	51.875	1	24.564	0.00309979	63.473
P35283	15	P35283	P35283	Ras-related protein Rab-12	Rab12	sp|P35283|RAB12_MOUSE Ras-related protein Rab-12 OS=Mus musculus OX=10090 GN=Rab12 PE=1 SV=3	0.442566	0.156364	0	0.00787183	47.568	31.314	47.568	0.442566	0	0.00787183	47.568																									0	0		#NUM!
P35283	20	P35283	P35283	Ras-related protein Rab-12	Rab12	sp|P35283|RAB12_MOUSE Ras-related protein Rab-12 OS=Mus musculus OX=10090 GN=Rab12 PE=1 SV=3	0.999875	8.87411e-06	41.1472	3.07696e-11	102.97	91.513	86.732	0.999839	40.4857	3.07696e-11	102.97	0.998281	29.3555	6.24701e-06	74.905	0.998178	28.6851	4.80086e-06	76.799	0.996535	25.9599	9.31385e-09	94.594	0.996323	26.8732	1.0742e-06	83.09	0.999875	41.1472	6.15832e-07	86.732	0.99241	24.1748	1.85053e-06	80.664	0.999681	36.3484	1.02597e-08	93.876	0.982014	18.2669	1.36771e-06	81.297
P35486	232	P35486	P35486	Pyruvate dehydrogenase E1 component subunit alpha, somatic form, mitochondrial	Pdha1	sp|P35486|ODPA_MOUSE Pyruvate dehydrogenase E1 component subunit alpha, somatic form, mitochondrial OS=Mus musculus OX=10090 GN=Pdha1 PE=1 SV=1	0.924651	0.0103023	10.8896	0.00545696	70.675	54.537	70.675					0.682276	3.32868	0.0434146	43.306	0.699915	3.67861	0.00692395	69.276					0.914905	10.3212	0.00653107	69.65	0.694886	3.59496	0.00814859	68.107	0.694886	3.59496	0.0236297	54.27	0	0		#NUM!
P35486	293	P35486	P35486	Pyruvate dehydrogenase E1 component subunit alpha, somatic form, mitochondrial	Pdha1	sp|P35486|ODPA_MOUSE Pyruvate dehydrogenase E1 component subunit alpha, somatic form, mitochondrial OS=Mus musculus OX=10090 GN=Pdha1 PE=1 SV=1	0.999263	6.22834e-05	31.4927	2.05377e-97	239.75	231.52	196.37	0.983856	18.4169	1.78878e-15	141.55	0.984973	18.1778	5.79635e-33	177.58	0.997735	26.4418	2.05377e-97	239.75	0.999263	31.4927	1.77112e-47	196.37	0.984878	18.1778	1.14568e-21	151.59	0.996404	24.4271	1.93482e-33	173.28	0.998466	28.4204	1.45568e-57	209.39	0.997099	26.1721	1.88229e-28	164.88	0.956369	14.7285	1.37914e-25	157.68
P35486	300	P35486	P35486	Pyruvate dehydrogenase E1 component subunit alpha, somatic form, mitochondrial	Pdha1	sp|P35486|ODPA_MOUSE Pyruvate dehydrogenase E1 component subunit alpha, somatic form, mitochondrial OS=Mus musculus OX=10090 GN=Pdha1 PE=1 SV=1	0.989863	0.00117038	19.9084	2.3929e-34	182.35	166.05	155.1	0.733305	4.49088	1.81679e-06	116.96	0.957192	13.5111	5.79635e-33	177.58	0.953361	13.1539	2.3929e-34	182.35	0.984145	18.0364	9.21432e-20	143.28	0.951254	13.0489	9.34587e-07	116	0.962823	14.0954	4.26177e-28	162.79	0.989863	19.9084	9.22447e-26	157.58	0.799434	6.05318	4.49882e-07	120.66	0.805387	6.20623	1.37914e-25	157.68
P35550	130	P35550	P35550	rRNA 2'-O-methyltransferase fibrillarin	Fbl	sp|P35550|FBRL_MOUSE rRNA 2'-O-methyltransferase fibrillarin OS=Mus musculus OX=10090 GN=Fbl PE=1 SV=2	0.995009	0.000553526	22.9968	1.1087e-97	238.19	218.52	149.47	0.850698	8.51645	2.52353e-14	173.98	0.932588	11.4369	9.00214e-29	162.77	0.959275	13.7209	1.64969e-97	235.72	0.970123	15.1149	7.40172e-48	195.61	0.718186	4.06274	1.70764e-14	137.69	0.941596	12.0794	1.24468e-08	130.56	0.941141	12.0794	1.1087e-97	238.19	0.905587	10.0966	8.05382e-29	163.79	0.927947	11.0987	5.79922e-26	153.04
P35564	582	P35564	P35564	Calnexin	Canx	sp|P35564|CALX_MOUSE Calnexin OS=Mus musculus OX=10090 GN=Canx PE=1 SV=1	1	0	206.46	1.15631e-270	316.32	262.76	218.79	1	267.932	7.39247e-242	305.48	1	229.789	5.08264e-144	263.53	1	246.587	2.90907e-190	292.63	1	93.3264	7.39247e-242	305.48	1	222.418	3.91814e-166	278.16	1	102.552	3.60665e-242	309.87	1	229.789	1.24292e-270	315.73	1	201.334	5.48089e-89	239.31	1	193.19	1.2775e-73	224.52
P35569	3	P35569	P35569	Insulin receptor substrate 1	Irs1	sp|P35569|IRS1_MOUSE Insulin receptor substrate 1 OS=Mus musculus OX=10090 GN=Irs1 PE=1 SV=1	0.950731	0.00630427	14.3636	0.00209357	65.092	50.934	65.092									0.950731	14.3636	0.00209357	65.092
P35569	1096	P35569	P35569	Insulin receptor substrate 1	Irs1	sp|P35569|IRS1_MOUSE Insulin receptor substrate 1 OS=Mus musculus OX=10090 GN=Irs1 PE=1 SV=1	0.533612	0.105618	1.77886	0.00706049	42.095	33.045	42.095													0.533612	1.77886	0.00706049	42.095
P35569	1097	P35569	P35569	Insulin receptor substrate 1	Irs1	sp|P35569|IRS1_MOUSE Insulin receptor substrate 1 OS=Mus musculus OX=10090 GN=Irs1 PE=1 SV=1	0.957228	0.00546812	13.8739	0.000278923	87.026	63.272	87.026					0.860946	9.23016	0.00198931	73.951	0.957228	13.8739	0.000278923	87.026	0.898124	9.65354	0.000389172	84.718	0.406915	2.33407	0.0566376	47.288	0.643548	5.71117	0.0101493	58.674	0.640516	5.97884	0.0191772	50.207
P35601	244	P35601	P35601	Replication factor C subunit 1	Rfc1	sp|P35601|RFC1_MOUSE Replication factor C subunit 1 OS=Mus musculus OX=10090 GN=Rfc1 PE=1 SV=2	0.999879	8.55578e-06	39.1673	1.24812e-30	132.6	127	119.37	0.754522	5.28725	1.43023e-06	75.868	0.997824	26.616	8.97567e-12	101.4	0.99621	24.1998	3.56279e-14	107.26	0.999724	35.5948	1.24812e-30	132.6	0.992124	21.0196	6.67515e-14	103.35	0.945279	12.4092	7.9459e-08	81.329	0.999879	39.1673	8.78201e-19	119.37	0.99316	21.6281	4.93834e-14	105.53	0.99983	37.7053	1.81639e-14	109.46
P35601	535	P35601	P35601	Replication factor C subunit 1	Rfc1	sp|P35601|RFC1_MOUSE Replication factor C subunit 1 OS=Mus musculus OX=10090 GN=Rfc1 PE=1 SV=2	0.999988	6.76294e-07	49.1546	0.00278425	88.021	59.816	88.021									0.999988	49.1546	0.00278425	88.021													0.999986	48.6409	0.0135873	80.245
P35601	155	P35601	P35601	Replication factor C subunit 1	Rfc1	sp|P35601|RFC1_MOUSE Replication factor C subunit 1 OS=Mus musculus OX=10090 GN=Rfc1 PE=1 SV=2	0.99999	5.01555e-07	50.1449	5.11155e-89	180.6	169.5	163.31	0.961565	14.1424	6.45067e-24	117.49	0.99013	20.0794	5.11155e-89	180.6	0.99999	50.1449	2.33618e-74	163.31	0.999672	34.9922	3.58849e-62	154.25	0.945901	12.586	5.99905e-43	138.16	0.995667	23.7308	2.15323e-74	164.03	0.995744	23.6961	5.41446e-75	170.33					0.992882	21.5497	9.43326e-43	135.91
P35601	163	P35601	P35601	Replication factor C subunit 1	Rfc1	sp|P35601|RFC1_MOUSE Replication factor C subunit 1 OS=Mus musculus OX=10090 GN=Rfc1 PE=1 SV=2	0.227553	0.241229	0	7.31619e-05	59.356	52.481	53.747																	0	0		#NUM!
P35601	266	P35601	P35601	Replication factor C subunit 1	Rfc1	sp|P35601|RFC1_MOUSE Replication factor C subunit 1 OS=Mus musculus OX=10090 GN=Rfc1 PE=1 SV=2	0.996278	0.000392603	27.0839	0.0014237	60.768	46.336	59.434									0.984565	19.8168	0.0014237	60.768									0.996278	27.0839	0.0016765	59.434	0.720435	6.98877	0.00445465	49.606
P35601	107	P35601	P35601	Replication factor C subunit 1	Rfc1	sp|P35601|RFC1_MOUSE Replication factor C subunit 1 OS=Mus musculus OX=10090 GN=Rfc1 PE=1 SV=2	0.57939	0.0884746	1.99242	0.00344141	54.311	40.153	48.106									0.524374	1.60765	0.0156219	43.728
P35689	382	P35689	P35689	DNA excision repair protein ERCC-5	Ercc5	sp|P35689|ERCC5_MOUSE DNA excision repair protein ERCC-5 OS=Mus musculus OX=10090 GN=Ercc5 PE=1 SV=4	0.486274	0.136804	0	0.0164433	47.548	38.164	47.548									0.486274	0	0.0164433	47.548
P35689	384	P35689	P35689	DNA excision repair protein ERCC-5	Ercc5	sp|P35689|ERCC5_MOUSE DNA excision repair protein ERCC-5 OS=Mus musculus OX=10090 GN=Ercc5 PE=1 SV=4	0.771123	0.0387513	5.44101	0.00409419	60.209	49.978	60.209									0.486274	0	0.0164433	47.548
P35822	868	P35822	P35822	Receptor-type tyrosine-protein phosphatase kappa	Ptprk	sp|P35822|PTPRK_MOUSE Receptor-type tyrosine-protein phosphatase kappa OS=Mus musculus OX=10090 GN=Ptprk PE=1 SV=1	0.897244	0.015186	11.2641	4.03141e-28	141.1	122.78	141.1									0.772423	6.41491	6.16523e-10	101.29	0	0		#NUM!	0.459502	0	8.9271e-07	85.636	0.812935	7.41519	5.21711e-21	130.71	0.557727	3.05884	3.89694e-27	132.48
P35831	550	P35831	P35831	Tyrosine-protein phosphatase non-receptor type 12	Ptpn12	sp|P35831|PTN12_MOUSE Tyrosine-protein phosphatase non-receptor type 12 OS=Mus musculus OX=10090 GN=Ptpn12 PE=1 SV=3	0.599999	0.0817919	4.28092	0.000682595	52.717	47.956	52.717
P35831	331	P35831	P35831	Tyrosine-protein phosphatase non-receptor type 12	Ptpn12	sp|P35831|PTN12_MOUSE Tyrosine-protein phosphatase non-receptor type 12 OS=Mus musculus OX=10090 GN=Ptpn12 PE=1 SV=3	0.848496	0.0226904	10.6505	3.04021e-11	91.514	81.717	42.353									0.848496	10.6505	0.000908977	42.353	0.776922	7.07877	3.04021e-11	91.514									0.580613	4.38349	2.21919e-06	76.402
P35831	448	P35831	P35831	Tyrosine-protein phosphatase non-receptor type 12	Ptpn12	sp|P35831|PTN12_MOUSE Tyrosine-protein phosphatase non-receptor type 12 OS=Mus musculus OX=10090 GN=Ptpn12 PE=1 SV=3	0.697088	0.0558076	3.61972	0.00337554	63.165	47.4	43.841													0.697088	3.61972	0.0342602	43.841									0.691983	3.51522	0.00337554	63.165	0.6402	2.50254	0.0181201	46.178
P35831	434	P35831	P35831	Tyrosine-protein phosphatase non-receptor type 12	Ptpn12	sp|P35831|PTN12_MOUSE Tyrosine-protein phosphatase non-receptor type 12 OS=Mus musculus OX=10090 GN=Ptpn12 PE=1 SV=3	1	0	29.0231	0.00117871	113.74	42.884	63.302	1	57.2491	0.00843192	97.431	1	65.4737	0.00843917	99.136	1	57.2491	0.00914267	86.67	1	61.0899	0.00954826	83.998	1	49.5272	0.00929363	85.676	1	78.0605	0.00841382	93.178	1	91.0848	0.00117871	113.74	1	23.6609	0.00676947	85.716	1	26.3075	0.0035947	74.92
P35831	587	P35831	P35831	Tyrosine-protein phosphatase non-receptor type 12	Ptpn12	sp|P35831|PTN12_MOUSE Tyrosine-protein phosphatase non-receptor type 12 OS=Mus musculus OX=10090 GN=Ptpn12 PE=1 SV=3	0.456735	0.150341	0	1.93432e-07	82.849	72.045	82.849	0	0		#NUM!	0.302074	0	0.00038532	48.693	0.456735	0	1.93432e-07	82.849	0	0		#NUM!	0	0		#NUM!	0.38059	0	8.46335e-05	57.076	0.446621	0	4.1996e-05	62.582
P35831	588	P35831	P35831	Tyrosine-protein phosphatase non-receptor type 12	Ptpn12	sp|P35831|PTN12_MOUSE Tyrosine-protein phosphatase non-receptor type 12 OS=Mus musculus OX=10090 GN=Ptpn12 PE=1 SV=3	0.456735	0.150431	0	1.93432e-07	82.849	72.045	82.849	0	0		#NUM!	0.302074	0	0.00038532	48.693	0.456735	0	1.93432e-07	82.849	0	0		#NUM!	0	0		#NUM!	0.38059	0	8.46335e-05	57.076	0.446621	0	4.1996e-05	62.582
P35979	38	P35979	P35979	Large ribosomal subunit protein uL11	Rpl12	sp|P35979|RL12_MOUSE Large ribosomal subunit protein uL11 OS=Mus musculus OX=10090 GN=Rpl12 PE=1 SV=2	1	0	25.155	0.00267408	77.062	44.733	45.653	1	29.2914	0.0161024	60.598	1	46.34	0.00358294	74.611	1	36.9549	0.00267408	77.062
P35980	130	P35980	P35980	Large ribosomal subunit protein eL18	Rpl18	sp|P35980|RL18_MOUSE Large ribosomal subunit protein eL18 OS=Mus musculus OX=10090 GN=Rpl18 PE=1 SV=3	1	6.39849e-11	85.8387	5.79601e-23	146.81	132.04	146.81	0.999971	45.3463	1.65556e-12	129.15	0.999998	57.4637	1.86908e-12	128.79	1	72.5001	1.47514e-12	129.46	1	65.9843	3.26858e-12	126.4	0.999999	62.9346	1.29155e-16	135.18	0.999952	43.216	7.25232e-08	110.56	1	85.8387	5.79601e-23	146.81	0.999951	43.0684	4.30358e-12	124.63	0.999924	41.1666	8.8268e-09	111.66
P36916	51	P36916	P36916	Guanine nucleotide-binding protein-like 1	Gnl1	sp|P36916|GNL1_MOUSE Guanine nucleotide-binding protein-like 1 OS=Mus musculus OX=10090 GN=Gnl1 PE=1 SV=4	0.625344	0.0748191	1.58159	0.00127349	54.658	46.474	40.085									0.593844	5.01357	0.00127349	54.658					0.625344	1.58159	0.00537189	40.085
P37889	568	P37889	P37889	Fibulin-2	Fbln2	sp|P37889|FBLN2_MOUSE Fibulin-2 OS=Mus musculus OX=10090 GN=Fbln2 PE=1 SV=2	0.999998	7.88754e-08	56.6896	0.00200409	79.705	58.405	79.705	0.999292	31.4952	0.0685628	46.101	0.999998	56.6896	0.00200409	79.705	0.999937	42.0021	0.0188777	61.989	0	0		#NUM!																	0	0		#NUM!
P37889	574	P37889	P37889	Fibulin-2	Fbln2	sp|P37889|FBLN2_MOUSE Fibulin-2 OS=Mus musculus OX=10090 GN=Fbln2 PE=1 SV=2	1	9.71324e-13	102.4	1.19757e-06	147.63	124.26	147.63	0.999994	52.3157	4.67491e-06	113.61	0.999999	61.7725	0.000827686	87.216	1	77.6441	1.79961e-06	124.12	1	79.3315	2.38722e-06	120.57	0.999995	52.7932	4.79455e-05	107.09	1	68.8869	2.56466e-06	120.03	0.999995	52.7932	4.79455e-05	107.09	0.999787	36.7104	0.0028639	77.185	0.998991	29.9576	0.00369093	74.76
P37913	906	P37913	P37913	DNA ligase 1	Lig1	sp|P37913|DNLI1_MOUSE DNA ligase 1 OS=Mus musculus OX=10090 GN=Lig1 PE=1 SV=2	0.570299	0.0907274	0	0.00102164	47.397	42.442	46.131					0.570299	0	0.00126083	46.131													0.564451	0	0.00102164	47.397
P37913	907	P37913	P37913	DNA ligase 1	Lig1	sp|P37913|DNLI1_MOUSE DNA ligase 1 OS=Mus musculus OX=10090 GN=Lig1 PE=1 SV=2	0.713311	0.0518234	3.62642	9.42107e-16	120.84	115.85	120.84					0.570299	0	0.00126083	46.131	0.713311	3.62642	9.42107e-16	120.84					0.667004	2.04624	3.09422e-05	66.893	0.712269	3.58894	2.0005e-11	105.77	0.678658	2.49083	0.000959394	47.726
P37913	911	P37913	P37913	DNA ligase 1	Lig1	sp|P37913|DNLI1_MOUSE DNA ligase 1 OS=Mus musculus OX=10090 GN=Lig1 PE=1 SV=2	0.9421	0.00737367	10.8462	9.42107e-16	120.84	115.85	120.84					0.570299	0	0.00126083	46.131	0.9421	10.8462	9.42107e-16	120.84					0.667004	2.04624	3.09422e-05	66.893	0.941136	10.7246	2.0005e-11	105.77	0.840443	6.06793	0.000959394	47.726
P37913	65	P37913	P37913	DNA ligase 1	Lig1	sp|P37913|DNLI1_MOUSE DNA ligase 1 OS=Mus musculus OX=10090 GN=Lig1 PE=1 SV=2	0.994555	0.000611244	22.6161	0.000338019	67.655	53.894	67.655													0	0		#NUM!									0.970668	15.1973	0.00223581	40.622
P37913	49	P37913	P37913	DNA ligase 1	Lig1	sp|P37913|DNLI1_MOUSE DNA ligase 1 OS=Mus musculus OX=10090 GN=Lig1 PE=1 SV=2	0.916068	0.0115705	10.38	5.78718e-05	102.73	80.09	102.73																					0.916068	10.38	5.78718e-05	102.73
P37913	51	P37913	P37913	DNA ligase 1	Lig1	sp|P37913|DNLI1_MOUSE DNA ligase 1 OS=Mus musculus OX=10090 GN=Lig1 PE=1 SV=2	0.958812	0.00523478	13.6696	4.46404e-17	144.51	127.84	138.42	0.923627	10.8255	4.97733e-13	132.79	0.923244	10.802	5.04488e-13	136.3	0.932282	11.3884	4.46404e-17	144.51	0.929746	11.2169	3.1979e-13	138.42	0.885367	8.87812	3.80061e-06	119.69	0.724001	4.18832	5.26032e-06	110.38	0.956233	13.3942	5.29952e-17	142.91	0.861355	7.93277	0.000191037	81.565
P39447	1576	P39447	P39447	Tight junction protein ZO-1	Tjp1	sp|P39447|ZO1_MOUSE Tight junction protein ZO-1 OS=Mus musculus OX=10090 GN=Tjp1 PE=1 SV=2	0.84458	0.0232543	9.3701	6.04275e-52	148.66	134.71	90.136	0.613749	3.61064	1.57966e-23	112.39	0.84458	9.3701	4.00468e-08	90.136	0.526782	3.02139	1.16863e-51	145.33	0.64759	4.09305	6.04275e-52	148.66	0.536517	3.64644	9.79566e-17	106.63	0.778948	7.09343	1.73347e-43	141.09	0.714092	5.26723	1.5484e-05	74.28	0.653929	4.18785	8.72404e-32	123.28	0.527884	3.49581	5.60179e-33	129.51
P39447	1577	P39447	P39447	Tight junction protein ZO-1	Tjp1	sp|P39447|ZO1_MOUSE Tight junction protein ZO-1 OS=Mus musculus OX=10090 GN=Tjp1 PE=1 SV=2	0.330436	0.202991	0	0.00116845	45.735	38.202	45.735																													0	0		#NUM!
P39447	275	P39447	P39447	Tight junction protein ZO-1	Tjp1	sp|P39447|ZO1_MOUSE Tight junction protein ZO-1 OS=Mus musculus OX=10090 GN=Tjp1 PE=1 SV=2	0.603985	0.0806539	2.37658	1.27323e-30	111	98.142	79.587	0.520159	0	7.92757e-10	66.835					0.514292	3.23535	1.27323e-30	98.996	0.569842	0	1.76085e-13	80.99					0.535228	0	9.11284e-13	81.481	0.467409	0	6.26442e-17	90.207	0.388161	0	1.94301e-07	51.329	0.43311	0	3.26704e-05	45.318
P39447	277	P39447	P39447	Tight junction protein ZO-1	Tjp1	sp|P39447|ZO1_MOUSE Tight junction protein ZO-1 OS=Mus musculus OX=10090 GN=Tjp1 PE=1 SV=2	0.721551	0.0503899	4.559	1.08824e-48	135.13	120.65	135.13	0.519795	0	7.92757e-10	66.835	0.721551	4.559	1.08824e-48	135.13					0.569892	0	1.76085e-13	80.99					0.534885	0	9.11284e-13	81.481	0.467409	0	6.26442e-17	90.207	0.388161	0	1.94301e-07	51.329	0.433036	0	3.26704e-05	45.318
P39447	280	P39447	P39447	Tight junction protein ZO-1	Tjp1	sp|P39447|ZO1_MOUSE Tight junction protein ZO-1 OS=Mus musculus OX=10090 GN=Tjp1 PE=1 SV=2	0.748058	0.0436962	6.31346	1.08824e-48	135.13	120.65	135.13	0.601679	2.46742	1.28097e-10	78.713	0.748058	6.31346	1.08824e-48	135.13	0.421753	1.93803	3.04807e-05	51.694	0.723205	2.95656	1.76085e-13	80.99					0.648483	2.58218	9.11284e-13	81.481	0.529133	3.81836	6.26442e-17	90.207	0.41309	2.96868	1.94301e-07	51.329	0.43754	1.5086	3.26704e-05	45.318
P39447	297	P39447	P39447	Tight junction protein ZO-1	Tjp1	sp|P39447|ZO1_MOUSE Tight junction protein ZO-1 OS=Mus musculus OX=10090 GN=Tjp1 PE=1 SV=2	0.181018	0.251204	0.525155	0.000480888	42.059	34.06	42.059													0.181018	0.525155	0.000480888	42.059
P39447	1614	P39447	P39447	Tight junction protein ZO-1	Tjp1	sp|P39447|ZO1_MOUSE Tight junction protein ZO-1 OS=Mus musculus OX=10090 GN=Tjp1 PE=1 SV=2	0.989879	0.00116536	19.9037	2.81787e-118	193.6	172.15	153.81	0.965743	14.5012	3.15465e-62	153.97	0.988026	19.1658	4.23563e-52	148.89	0.959279	13.7215	2.90531e-62	154.63	0.979386	16.7682	2.469e-75	171.31	0.953285	13.0976	1.79004e-103	186.56	0.989879	19.9037	3.21228e-62	153.81	0.856868	7.77234	2.49208e-52	150.26					0.850588	7.77113	9.66168e-64	162.07
P39447	212	P39447	P39447	Tight junction protein ZO-1	Tjp1	sp|P39447|ZO1_MOUSE Tight junction protein ZO-1 OS=Mus musculus OX=10090 GN=Tjp1 PE=1 SV=2	0.988334	0.00138259	19.2798	0.00757209	64.439	33.641	64.439					0.956844	13.458	0.017043	55.806	0.984064	17.9065	0.0262848	59.35					0	0		#NUM!	0	0		#NUM!	0.988334	19.2798	0.00757209	64.439					0.965016	14.4067	0.0598029	50.04
P39447	125	P39447	P39447	Tight junction protein ZO-1	Tjp1	sp|P39447|ZO1_MOUSE Tight junction protein ZO-1 OS=Mus musculus OX=10090 GN=Tjp1 PE=1 SV=2	0.999828	1.30524e-05	39.5062	3.85218e-71	161.02	145.81	136.24	0.858065	6.31102	1.52954e-08	84.713	0.987947	20.1552	2.65256e-23	112.03	0.999714	35.8339	2.71034e-56	144.67	0.992873	23.6399	2.53772e-24	118.42	0.973212	17.2714	5.4401e-17	106.41	0.978327	18.3709	2.00652e-32	126.28	0.999828	39.5062	4.49113e-44	136.24	0.871538	10.3116	1.077e-08	85.416	0.947145	11.6536	3.56018e-16	102.29
P39447	131	P39447	P39447	Tight junction protein ZO-1	Tjp1	sp|P39447|ZO1_MOUSE Tight junction protein ZO-1 OS=Mus musculus OX=10090 GN=Tjp1 PE=1 SV=2	0.84826	0.0228304	7.46981	3.85218e-71	161.02	145.81	161.02	0.680926	2.4818	1.52954e-08	84.713	0.639176	2.43252	2.65256e-23	112.03	0.668607	3.04728	2.71034e-56	144.67	0.77815	5.44415	2.53772e-24	118.42	0.751397	4.79325	5.4401e-17	106.41	0.686719	3.35287	2.00652e-32	126.28	0.836335	7.08396	4.49113e-44	136.24	0.65545	2.04473	1.077e-08	85.416	0.640062	2.16213	3.56018e-16	102.29
P39447	1051	P39447	P39447	Tight junction protein ZO-1	Tjp1	sp|P39447|ZO1_MOUSE Tight junction protein ZO-1 OS=Mus musculus OX=10090 GN=Tjp1 PE=1 SV=2	0.999959	2.95831e-06	44.6933	0.000201796	109.84	85.553	109.84									0.999959	44.6933	0.000201796	109.84	0.99796	28.1869	0.0165371	63.29	0.984812	20.6341	0.00922787	43.184	0.999491	34.9431	0.00115127	81.494	0.99214	23.9685	0.00804567	68.83	0	0		#NUM!
P39447	617	P39447	P39447	Tight junction protein ZO-1	Tjp1	sp|P39447|ZO1_MOUSE Tight junction protein ZO-1 OS=Mus musculus OX=10090 GN=Tjp1 PE=1 SV=2	0.999687	2.41275e-05	35.0482	4.327e-41	152.96	131.92	148.02	0.902976	9.68814	1.98243e-07	91.722	0.771377	5.34229	3.16537e-05	79.426	0.892488	9.19146	8.51358e-08	97.395	0.854179	7.67964	7.38151e-05	73.341	0.819968	6.5851	3.6587e-10	105.73	0.999687	35.0482	1.89572e-33	148.02	0.966164	14.5567	4.327e-41	152.96	0.728926	4.36628	9.79951e-11	110.14
P39447	622	P39447	P39447	Tight junction protein ZO-1	Tjp1	sp|P39447|ZO1_MOUSE Tight junction protein ZO-1 OS=Mus musculus OX=10090 GN=Tjp1 PE=1 SV=2	0.565372	0.0921898	1.15555	1.43876e-07	87.509	63.768	87.509																																	0.565372	1.15555	1.43876e-07	87.509
P39688	21	P39688	P39688	Tyrosine-protein kinase Fyn	Fyn	sp|P39688|FYN_MOUSE Tyrosine-protein kinase Fyn OS=Mus musculus OX=10090 GN=Fyn PE=1 SV=4	0.999869	9.85537e-06	41.7338	1.58381e-17	141.55	107.61	51.264	0.873636	10.9367	0.00043859	75.55	0.991141	23.5862	4.21189e-09	114.52	0.999428	35.8326	0.000659533	87.148	0.999664	35.33	8.17698e-10	111.93	0.990364	21.4067	0.000218236	92.977	0.997121	25.9139	1.35804e-16	137.44	0.999869	41.7338	1.44385e-06	104.21	0.97682	16.4102	0.000181995	86.378	0.999428	35.8326	0.000777955	67.164
P39688	25	P39688	P39688	Tyrosine-protein kinase Fyn	Fyn	sp|P39688|FYN_MOUSE Tyrosine-protein kinase Fyn OS=Mus musculus OX=10090 GN=Fyn PE=1 SV=4	0.470039	0.143601	0	0.000512946	93.51	68.456	93.51													0	0		#NUM!					0.470039	0	0.000512946	93.51
P39688	26	P39688	P39688	Tyrosine-protein kinase Fyn	Fyn	sp|P39688|FYN_MOUSE Tyrosine-protein kinase Fyn OS=Mus musculus OX=10090 GN=Fyn PE=1 SV=4	0.541556	0.102566	3.00615	0.000512946	93.51	68.456	43.501					0.47964	2.28447	0.00247763	50.957					0	0		#NUM!	0.467783	2.1355	0.00725004	40.645	0.470039	0	0.000512946	93.51	0.43221	1.29596	0.000871867	63.998					0.541556	3.00615	0.09714	43.501
P40201	214	P40201	P40201	Chromodomain-helicase-DNA-binding protein 1	Chd1	sp|P40201|CHD1_MOUSE Chromodomain-helicase-DNA-binding protein 1 OS=Mus musculus OX=10090 GN=Chd1 PE=1 SV=3	0.997975	0.0001995	26.9176	0.0013534	49.537	40.441	49.537					0.964156	14.1328	0.0145616	40.844									0.964156	14.1328	0.00912783	43.794													0.997975	26.9176	0.0013534	49.537
P40201	215	P40201	P40201	Chromodomain-helicase-DNA-binding protein 1	Chd1	sp|P40201|CHD1_MOUSE Chromodomain-helicase-DNA-binding protein 1 OS=Mus musculus OX=10090 GN=Chd1 PE=1 SV=3	0.997975	0.000200767	26.9176	0.0013534	49.537	40.441	49.537					0.964156	14.1328	0.0145616	40.844									0.964156	14.1328	0.00912783	43.794													0.997975	26.9176	0.0013534	49.537
P40201	1228	P40201	P40201	Chromodomain-helicase-DNA-binding protein 1	Chd1	sp|P40201|CHD1_MOUSE Chromodomain-helicase-DNA-binding protein 1 OS=Mus musculus OX=10090 GN=Chd1 PE=1 SV=3	0.99092	0.001021	20.3796	0.0163101	63.694	35.333	63.694	0.983917	17.866	0.0557525	48.998	0.77218	5.30125	0.0382458	54.259	0.99092	20.3796	0.0163101	63.694	0.963915	14.2671	0.020047	61.213	0	0		#NUM!	0.980921	17.1108	0.0454044	51.531	0.542763	0.744684	0.0602923	47.971	0	0		#NUM!	0.570215	1.22787	0.0780419	43.958
P40694	800	P40694	P40694	DNA-binding protein SMUBP-2	Ighmbp2	sp|P40694|SMBP2_MOUSE DNA-binding protein SMUBP-2 OS=Mus musculus OX=10090 GN=Ighmbp2 PE=1 SV=1	0.803254	0.0324543	8.1996	0.000448696	52.329	45.377	46.696					0.803254	8.1996	0.000455516	46.696													0.317421	2.9578	0.000448696	52.329
P41105	115	P41105	P41105	Large ribosomal subunit protein eL28	Rpl28	sp|P41105|RL28_MOUSE Large ribosomal subunit protein eL28 OS=Mus musculus OX=10090 GN=Rpl28 PE=1 SV=2	1	0	59.0525	0.0186856	85.533	12.3	74.165					1	64.9268	0.0193181	83.456					0	0		#NUM!	1	53.4696	0.0186856	85.533	1	37.7713	0.0435812	63.184	1	60.8993	0.0186856	85.533	1	53.4696	0.0237291	75.509
P41230	317	P41230	P41230	Lysine-specific demethylase 5C	Kdm5c	sp|P41230|KDM5C_MOUSE Lysine-specific demethylase 5C OS=Mus musculus OX=10090 GN=Kdm5c PE=1 SV=4	0.963646	0.00462016	16.8041	0.00270409	65.472	58.581	65.472	0.93334	14.4112	0.00607671	46.318	0	0		#NUM!													0.963646	16.8041	0.00270409	65.472	0.895078	12.0604	0.00927928	49.482
P42128	431	P42128	P42128	Forkhead box protein K1	Foxk1	sp|P42128|FOXK1_MOUSE Forkhead box protein K1 OS=Mus musculus OX=10090 GN=Foxk1 PE=1 SV=2	0.999998	1.03182e-07	56.1368	0.00145868	64.675	49.984	64.675					0.998391	27.9267	0.0276304	50.806	0.999998	56.1368	0.00145868	64.675									0.992075	20.9757	0.0291915	41.743
P42128	402	P42128	P42128	Forkhead box protein K1	Foxk1	sp|P42128|FOXK1_MOUSE Forkhead box protein K1 OS=Mus musculus OX=10090 GN=Foxk1 PE=1 SV=2	0.996149	0.000424891	24.4173	3.90393e-05	80.534	63.252	52.52					0.988229	18.3408	0.00193476	70.529	0.996149	24.4173	0.00872434	52.52	0.985463	19.0675	0.00770057	54.368	0.667165	5.13581	0.000655929	72.175	0.839375	8.28864	0.00343005	56.215					0	0		#NUM!
P42128	406	P42128	P42128	Forkhead box protein K1	Foxk1	sp|P42128|FOXK1_MOUSE Forkhead box protein K1 OS=Mus musculus OX=10090 GN=Foxk1 PE=1 SV=2	0.974343	0.00306157	17.4647	0.000501946	102.38	74.017	82.59	0.594465	3.74294	0.00143986	60.564	0.716477	4.09736	0.00193476	70.529	0.974343	17.4647	0.00104142	82.59	0.810819	6.59282	0.00770057	54.368	0.632285	2.76818	0.00113426	83.692	0.917397	10.8678	0.00138927	81.526	0.666072	5.43077	0.00190972	76.768	0.673041	5.05697	0.0137524	57.288
P42128	414	P42128	P42128	Forkhead box protein K1	Foxk1	sp|P42128|FOXK1_MOUSE Forkhead box protein K1 OS=Mus musculus OX=10090 GN=Foxk1 PE=1 SV=2	0.717598	0.050887	3.37291	0.00917231	49.463	39.124	49.463																	0	0		#NUM!	0	0		#NUM!	0.717598	3.37291	0.00917231	49.463	0	0		#NUM!
P42128	235	P42128	P42128	Forkhead box protein K1	Foxk1	sp|P42128|FOXK1_MOUSE Forkhead box protein K1 OS=Mus musculus OX=10090 GN=Foxk1 PE=1 SV=2	0.538264	0.104137	0.954558	6.06303e-05	53.968	33.343	53.968
P42128	243	P42128	P42128	Forkhead box protein K1	Foxk1	sp|P42128|FOXK1_MOUSE Forkhead box protein K1 OS=Mus musculus OX=10090 GN=Foxk1 PE=1 SV=2	0.51997	0.11075	0.930847	6.06303e-05	53.968	33.343	53.968
P42128	427	P42128	P42128	Forkhead box protein K1	Foxk1	sp|P42128|FOXK1_MOUSE Forkhead box protein K1 OS=Mus musculus OX=10090 GN=Foxk1 PE=1 SV=2	0.550156	0.0989702	3.28415	0.00145868	42.385	32.798	42.385									0.550156	3.28415	0.00145868	42.385
P42208	207	P42208	P42208	Septin-2	Septin2	sp|P42208|SEPT2_MOUSE Septin-2 OS=Mus musculus OX=10090 GN=Septin2 PE=1 SV=2	0.323576	0.20713	0	0.000783586	42.828	36.807	42.828																					0.323576	0	0.000783586	42.828
P42208	218	P42208	P42208	Septin-2	Septin2	sp|P42208|SEPT2_MOUSE Septin-2 OS=Mus musculus OX=10090 GN=Septin2 PE=1 SV=2	1	1.47375e-17	145.382	0	396.45	365.04	337.04	1	145.382	0	337.04	1	133.273	0	396.45	1	101.813	0	379.3	1	89.1866	0	324.29	1	100.315	0	314.84	1	108.692	1.11698e-232	293.13	1	121.864	6.13523e-187	266.67	1	144.345	0	340.19	1	131.787	0	361.23
P42227	727	P42227	P42227	Signal transducer and activator of transcription 3	Stat3	sp|P42227|STAT3_MOUSE Signal transducer and activator of transcription 3 OS=Mus musculus OX=10090 GN=Stat3 PE=1 SV=2	0.706479	0.0530623	10.4626	3.59797e-05	67.364	66.126	67.364													0.506344	7.09992	0.00120631	58.457					0.652	8.87542	0.00137674	56.72	0.29402	2.92452	0.00385337	40.682
P42567	106	P42567	P42567	Epidermal growth factor receptor substrate 15	Eps15	sp|P42567|EPS15_MOUSE Epidermal growth factor receptor substrate 15 OS=Mus musculus OX=10090 GN=Eps15 PE=1 SV=1	0.301356	0.215266	0	1.28802e-05	69.398	69.385	69.398																					0.301356	0	1.28802e-05	69.398					0.246265	0	0.000884472	46.695
P42567	107	P42567	P42567	Epidermal growth factor receptor substrate 15	Eps15	sp|P42567|EPS15_MOUSE Epidermal growth factor receptor substrate 15 OS=Mus musculus OX=10090 GN=Eps15 PE=1 SV=1	0.375771	0.184242	0	3.77026e-08	85.849	77.173	65.801					0.373395	0	3.77026e-08	85.849	0.358084	1.7592	0.000157068	52.909									0.301356	0	1.28802e-05	69.398					0.246265	0	0.000884472	46.695
P42567	108	P42567	P42567	Epidermal growth factor receptor substrate 15	Eps15	sp|P42567|EPS15_MOUSE Epidermal growth factor receptor substrate 15 OS=Mus musculus OX=10090 GN=Eps15 PE=1 SV=1	0.375771	0.184335	0	3.77026e-08	85.849	77.173	65.801					0.373395	0	3.77026e-08	85.849													0.301356	0	1.28802e-05	69.398					0.246265	0	0.000884472	46.695
P43274	36	P43274	P43274	Histone H1.4	H1-4	sp|P43274|H14_MOUSE Histone H1.4 OS=Mus musculus OX=10090 GN=H1-4 PE=1 SV=2	0.983822	0.00192185	19.0122	3.36097e-21	167.29	113.73	104.16	0.959682	14.0815	1.14808e-05	115.26	0.833179	7.00627	2.63108e-08	122.96	0.764689	5.11904	1.27127e-05	107.03	0.938726	11.8621	3.36097e-21	167.29	0.841104	7.2455	6.80205e-09	129.65	0.964152	14.3123	5.44104e-19	161.08	0.669362	3.06424	1.70479e-05	96.447	0.66864	3.23091	0.00019183	101.42	0.834516	7.07015	0.000155466	98.281
P43274	2	P43274	P43274	Histone H1.4	H1-4	sp|P43274|H14_MOUSE Histone H1.4 OS=Mus musculus OX=10090 GN=H1-4 PE=1 SV=2	0.964396	0.00442899	14.3276	2.65449e-82	192.72	185.35	155.91	0.961551	13.9809	7.39081e-82	192.72	0.942848	12.1741	2.6153e-58	170.89	0.939738	11.9296	3.83245e-82	182.82	0.866644	8.12827	2.65449e-82	185.85	0.780391	5.50662	1.92906e-34	145.99	0.845079	7.36787	1.69444e-57	162.37	0.838003	7.13738	4.55496e-64	180.32	0.863825	8.02329	1.53795e-29	138.97	0.772969	5.32093	3.84531e-15	116.2
P43275	123	P43275	P43275	Histone H1.1	H1-1	sp|P43275|H11_MOUSE Histone H1.1 OS=Mus musculus OX=10090 GN=H1-1 PE=1 SV=2	0.987643	0.00144053	19.3259	0.000796572	110.08	87.391	110.08													0.948372	12.9121	0.0400945	64.918					0.833202	7.70212	0.0583442	54.343
P43275	106	P43275	P43275	Histone H1.1	H1-1	sp|P43275|H11_MOUSE Histone H1.1 OS=Mus musculus OX=10090 GN=H1-1 PE=1 SV=2	1	6.37022e-13	104.054	2.37088e-12	135.26	119.89	135.26																	0.999947	42.7674	0.00599304	71.976	1	104.054	2.37088e-12	135.26	1	89.9116	9.41192e-08	123.92	1	74.2134	0.00106143	113.07	0.999769	36.3671	0.0613751	43.798
P43275	2	P43275	P43275	Histone H1.1	H1-1	sp|P43275|H11_MOUSE Histone H1.1 OS=Mus musculus OX=10090 GN=H1-1 PE=1 SV=2	0.875246	0.0181076	8.46074	5.82441e-130	230.05	213.37	131.26	0.867478	8.15972	1.10839e-58	165.49	0.818671	6.54642	1.81943e-129	223.5	0.808911	6.26666	1.24077e-116	219.66	0.853758	7.66268	2.37848e-105	211.09	0.794975	5.8855	1.19702e-23	129.08	0.810188	6.30262	3.26064e-116	214.19	0.823485	6.6897	1.83508e-106	212.76	0.848009	7.46591	4.26806e-95	197.38	0.875246	8.46074	1.73661e-59	171.35
P43276	2	P43276	P43276	Histone H1.5	H1-5	sp|P43276|H15_MOUSE Histone H1.5 OS=Mus musculus OX=10090 GN=H1-5 PE=1 SV=2	0.98663	0.00157691	18.6802	3.25375e-167	261.06	229.44	160.47	0.963495	14.215	9.85398e-117	228.26	0.817541	6.51343	1.10727e-131	238.05	0.908185	9.95262	5.96416e-118	232.84	0.964396	14.3276	1.92508e-103	217.65	0.922637	10.7652	3.25375e-167	261.06	0.93749	11.7602	2.0286e-116	223.11	0.91059	10.0793	9.72818e-117	228.33	0.933914	11.502	1.34434e-30	138.96	0.931272	11.3195	1.01065e-150	253.34
P43276	18	P43276	P43276	Histone H1.5	H1-5	sp|P43276|H15_MOUSE Histone H1.5 OS=Mus musculus OX=10090 GN=H1-5 PE=1 SV=2	1	2.65237e-12	97.6616	0	351.98	325.87	247.16	1	66.9855	9.64417e-132	238.72	1	84.9511	3.58626e-209	279.96	1	88.1644	0	351.98	1	83.3394	2.94724e-209	280.63	1	63.2391	2.57717e-94	202.62	1	78.514	5.66642e-209	277.79	1	80.327	5.5774e-187	266.28	1	68.2724	6.84287e-82	193.47	1	89.3381	4.25866e-92	209.39
P43277	2	P43277	P43277	Histone H1.3	H1-3	sp|P43277|H13_MOUSE Histone H1.3 OS=Mus musculus OX=10090 GN=H1-3 PE=1 SV=2	0.939738	0.00781997	11.9296	7.03327e-64	179.1	169.57	155.87	0.747043	4.70299	1.69639e-22	128.94	0.765881	5.14724	7.03327e-64	179.1	0.737378	4.48359	2.83814e-42	153.36	0.892292	9.18261	1.55375e-42	157.42	0.848793	7.4923	4.94339e-49	178.22	0.877466	8.54972	4.24515e-52	164.97	0.821741	6.63685	5.65397e-39	148.19	0.822788	6.66794	8.83045e-53	170.89	0.819705	6.57674	1.37366e-63	175.8
P43407	188	P43407	P43407	Syndecan-2	Sdc2	sp|P43407|SDC2_MOUSE Syndecan-2 OS=Mus musculus OX=10090 GN=Sdc2 PE=1 SV=1	0.998204	0.000165168	27.4497	1.66877e-12	174.57	119.51	174.57	0.980772	17.0767	0.00014364	150.33	0.848704	7.54848	0.00126068	88.987	0.997918	26.8059	2.57069e-08	168.85	0.95481	13.2496	1.99117e-05	158.06													0.978061	16.4917	0.00036929	127.52
P45591	3	P45591	P45591	Cofilin-2	Cfl2	sp|P45591|COF2_MOUSE Cofilin-2 OS=Mus musculus OX=10090 GN=Cfl2 PE=1 SV=1	0.999743	2.05564e-05	35.9061	4.43337e-06	100.22	83.552	84.169	0.997511	26.0281	0.000642505	73.881					0.990198	20.0441	0.00241936	57.106					0.997428	25.8864	0.00231621	65.295					0.820252	6.59282	0.000562045	54.672	0.759641	4.99748	0.00175231	46.982	0.918377	10.5121	4.43337e-06	84.829
P46062	53	P46062	P46062	Signal-induced proliferation-associated protein 1	Sipa1	sp|P46062|SIPA1_MOUSE Signal-induced proliferation-associated protein 1 OS=Mus musculus OX=10090 GN=Sipa1 PE=1 SV=2	0.772339	0.038565	5.96632	0.00170812	52.03	48.41	52.03					0.718809	4.59135	0.0142257	46.178	0.727577	4.56579	0.00395623	46.178	0.772339	5.96632	0.00170812	52.03																	0.557862	1.71555	0.00360295	46.982
P46935	309	P46935	P46935	E3 ubiquitin-protein ligase NEDD4	Nedd4	sp|P46935|NEDD4_MOUSE E3 ubiquitin-protein ligase NEDD4 OS=Mus musculus OX=10090 GN=Nedd4 PE=1 SV=3	1	0	38.0075	6.49358e-40	194.55	168.53	51.073	1	19.8563	0.00347907	67.997	1	25.4174	0.001451	55.864	1	54.7954	6.49358e-40	194.55	1	25.4174	3.13213e-18	155.06	1	32.2779	0.000443238	68.576	1	54.7954	2.89197e-32	189.32	1	67.4548	1.68144e-08	128.41	1	45.3546	1.17222e-05	115.12	1	31.9775	0.00987903	57.328
P46938	112	P46938	P46938	Transcriptional coactivator YAP1	Yap1	sp|P46938|YAP1_MOUSE Transcriptional coactivator YAP1 OS=Mus musculus OX=10090 GN=Yap1 PE=1 SV=2	0.843774	0.0235879	7.3594	1.22858e-173	212.71	205.44	212.71	0.801484	6.19637	4.41206e-49	134.25	0.843774	7.3594	1.22858e-173	212.71	0.807131	6.488	1.36745e-61	146.5	0.815391	6.55804	1.37881e-91	168.49	0.47238	0	3.1962e-91	163.55	0.806565	6.4542	7.3059e-62	148.95	0.784941	5.73033	1.77371e-38	124.07	0.731698	4.9538	5.33911e-39	129.91	0.44621	0	1.21427e-38	126.57
P46938	113	P46938	P46938	Transcriptional coactivator YAP1	Yap1	sp|P46938|YAP1_MOUSE Transcriptional coactivator YAP1 OS=Mus musculus OX=10090 GN=Yap1 PE=1 SV=2	0.492522	0.133956	0	2.37628e-128	187.68	177.89	178.76	0	0		#NUM!	0.450375	0	2.37628e-128	187.68	0	0		#NUM!	0.492141	0	1.37881e-91	168.49	0.47238	0	3.1962e-91	163.55	0.446227	0	7.3059e-62	148.95	0.45033	0	2.05831e-38	123.99	0.483839	0	5.33911e-39	129.91	0.44621	0	1.21427e-38	126.57
P46938	94	P46938	P46938	Transcriptional coactivator YAP1	Yap1	sp|P46938|YAP1_MOUSE Transcriptional coactivator YAP1 OS=Mus musculus OX=10090 GN=Yap1 PE=1 SV=2	0.999987	7.82003e-07	48.7959	0	342.02	313.84	276.38	0.999918	40.872	1.34647e-244	295.43	0.999974	45.839	0	327.7	0.999862	38.5877	0	342.02	0.99998	47.0199	1.23456e-300	316.37	0.944347	12.2964	1.43759e-118	240.45	0.999767	36.328	1.56451e-244	294.05	0.999911	40.4848	1.25651e-271	304.24	0.999918	40.8708	4.48384e-103	223.45	0.977308	16.3417	1.82011e-118	239.7
P46938	148	P46938	P46938	Transcriptional coactivator YAP1	Yap1	sp|P46938|YAP1_MOUSE Transcriptional coactivator YAP1 OS=Mus musculus OX=10090 GN=Yap1 PE=1 SV=2	0.560998	0.0947511	1.06495	1.25181e-05	72.271	50.672	54.521									0.5	0	2.11124e-05	70.316					0	0		#NUM!	0	0		#NUM!					0	0		#NUM!
P46938	149	P46938	P46938	Transcriptional coactivator YAP1	Yap1	sp|P46938|YAP1_MOUSE Transcriptional coactivator YAP1 OS=Mus musculus OX=10090 GN=Yap1 PE=1 SV=2	0.814246	0.0297644	6.41817	1.11376e-33	144.17	123.8	130.43	0.788344	5.71086	4.24098e-11	109.5	0.785863	5.64655	5.21444e-27	139.11	0.769956	5.24654	1.68557e-10	102.79	0.775507	5.38384	5.1015e-08	94.45	0.788344	5.71086	4.24098e-11	109.5	0.778302	5.45386	6.21914e-11	108.45	0.795601	5.90215	1.20773e-26	135.18	0	0		#NUM!	0.785862	5.64653	5.85775e-08	93.381
P46938	90	P46938	P46938	Transcriptional coactivator YAP1	Yap1	sp|P46938|YAP1_MOUSE Transcriptional coactivator YAP1 OS=Mus musculus OX=10090 GN=Yap1 PE=1 SV=2	0.886025	0.0166567	9.66366	2.00813e-24	130.72	123.14	130.72	0.376075	0	0.00308345	49.089	0.864431	8.26757	7.72997e-24	127.12	0.886025	9.66366	2.00813e-24	130.72	0.811378	7.72331	2.52163e-23	124.82	0.494457	0	0.000165832	56.172	0.778087	6.18253	3.9243e-10	92.142	0.821781	7.81937	2.96744e-14	110.17	0.82443	7.50557	5.43457e-19	120.42	0.531587	0.50324	7.87627e-05	57.347
P47713	726	P47713	P47713	Cytosolic phospholipase A2;Phospholipase A2;Lysophospholipase	Pla2g4a	sp|P47713|PA24A_MOUSE Cytosolic phospholipase A2 OS=Mus musculus OX=10090 GN=Pla2g4a PE=1 SV=1	0.99835	0.000143747	27.9286	3.80384e-06	117.98	78.828	117.98	0.488648	2.03462	0.000374822	77.871	0.639794	6.37421	0.00176862	54.834	0.881794	12.205	0.000556424	66.644	0.785227	8.12888	3.29253e-05	90.22	0.582782	4.23405	0.00119253	60.474	0.631929	4.15568	3.31374e-05	92.474	0.611402	5.15696	0.00214509	50.531	0.483982	0	0.00188328	55.206	0	0		#NUM!
P47713	728	P47713	P47713	Cytosolic phospholipase A2;Phospholipase A2;Lysophospholipase	Pla2g4a	sp|P47713|PA24A_MOUSE Cytosolic phospholipase A2 OS=Mus musculus OX=10090 GN=Pla2g4a PE=1 SV=1	1	4.38302e-09	69.9654	5.9325e-139	270.32	234.67	270.32	1	63.8416	5.51173e-55	215.77	0.999858	38.5812	2.78043e-19	173.76	0.999994	52.5347	3.68129e-12	157.47	1	68.7283	4.18577e-68	225.04	0.999994	53.8886	1.24067e-33	193.49	1	69.9654	5.9325e-139	270.32	1	64.7426	7.68583e-44	209.43	0.999981	48.7788	1.64957e-12	160.16	0.999991	51.0529	1.01968e-20	182.23
P47713	434	P47713	P47713	Cytosolic phospholipase A2;Phospholipase A2;Lysophospholipase	Pla2g4a	sp|P47713|PA24A_MOUSE Cytosolic phospholipase A2 OS=Mus musculus OX=10090 GN=Pla2g4a PE=1 SV=1	0.745104	0.0447614	4.79625	0.000149533	82.609	78.89	82.609									0.745104	4.79625	0.000149533	82.609									0	0		#NUM!					0	0		#NUM!
P47713	435	P47713	P47713	Cytosolic phospholipase A2;Phospholipase A2;Lysophospholipase	Pla2g4a	sp|P47713|PA24A_MOUSE Cytosolic phospholipase A2 OS=Mus musculus OX=10090 GN=Pla2g4a PE=1 SV=1	0.551182	0.0983263	0	4.45038e-06	59.512	35.501	59.512																	0.19516	0	4.97152e-05	48.096	0	0		#NUM!					0	0		#NUM!
P47713	437	P47713	P47713	Cytosolic phospholipase A2;Phospholipase A2;Lysophospholipase	Pla2g4a	sp|P47713|PA24A_MOUSE Cytosolic phospholipase A2 OS=Mus musculus OX=10090 GN=Pla2g4a PE=1 SV=1	0.995079	0.000542671	23.5845	6.1508e-229	232.93	227.7	232.93	0.333212	1.31184	5.29671e-14	79.007	0.804067	9.57479	1.3571e-43	129.19	0.992417	21.5675	2.1512e-227	225.96	0.936954	12.244	5.06529e-228	231.44	0.418751	2.71076	2.56302e-34	114.85	0.995079	23.5845	6.1508e-229	232.93	0.260715	1.00649	3.01065e-27	106.08	0.523029	3.39029	3.06156e-80	155.96	0.597716	4.07055	7.40089e-96	162.54
P47713	723	P47713	P47713	Cytosolic phospholipase A2;Phospholipase A2;Lysophospholipase	Pla2g4a	sp|P47713|PA24A_MOUSE Cytosolic phospholipase A2 OS=Mus musculus OX=10090 GN=Pla2g4a PE=1 SV=1	0.50859	0.114226	1.48273	0.000329769	79.511	64.582	62.617																	0.446062	0	0.00119253	60.474					0	0		#NUM!	0.483982	0	0.00188328	55.206	0	0		#NUM!
P47753	9	P47753	P47753	F-actin-capping protein subunit alpha-1	Capza1	sp|P47753|CAZA1_MOUSE F-actin-capping protein subunit alpha-1 OS=Mus musculus OX=10090 GN=Capza1 PE=1 SV=4	1	0	26.628	8.53228e-07	111.33	97.698	70.235	1	30.6746	0.000979048	61.815	1	43.6418	8.53228e-07	111.33	1	48.4442	0.000327981	79.393	1	37.8259	2.72305e-05	95.767	1	34.1816	6.61382e-06	101.96	1	36.1681	0.000404209	75.548	1	51.5926	4.19053e-06	105.9	0	0		#NUM!	1	29.2201	0.000346846	78.441
P47754	9	P47754	P47754	F-actin-capping protein subunit alpha-2	Capza2	sp|P47754|CAZA2_MOUSE F-actin-capping protein subunit alpha-2 OS=Mus musculus OX=10090 GN=Capza2 PE=1 SV=3	1	0	27.8455	4.28353e-16	204.28	184.7	40.751													1	93.3264	4.28353e-16	153.94	1	82.1003	8.85137e-16	150.22													1	89.3857	2.00211e-11	144.12
P47811	2	P47811	P47811	Mitogen-activated protein kinase 14	Mapk14	sp|P47811|MK14_MOUSE Mitogen-activated protein kinase 14 OS=Mus musculus OX=10090 GN=Mapk14 PE=1 SV=3	0.464679	0.145757	1.47761	0.00677602	44.045	15.496	44.045
P47856	259	P47856	P47856	Glutamine--fructose-6-phosphate aminotransferase [isomerizing] 1	Gfpt1	sp|P47856|GFPT1_MOUSE Glutamine--fructose-6-phosphate aminotransferase [isomerizing] 1 OS=Mus musculus OX=10090 GN=Gfpt1 PE=1 SV=3	0.996791	0.000340701	24.9909	2.37952e-145	266.97	245.19	182.89	0.777261	6.40232	2.22213e-19	125.04	0.979803	16.8753	7.73742e-75	225.79	0.928487	12.246	1.28397e-106	247.14	0.995231	23.3037	9.68859e-107	248.67	0.973669	15.7587	4.03818e-20	141.54	0.944915	12.3699	1.87893e-52	205.96	0.996791	24.9909	1.06206e-62	182.89	0.848847	7.57336	2.58698e-26	154.1	0.971792	15.4601	3.2209e-33	147.53
P47930	230	P47930	P47930	Fos-related antigen 2	Fosl2	sp|P47930|FOSL2_MOUSE Fos-related antigen 2 OS=Mus musculus OX=10090 GN=Fosl2 PE=1 SV=2	0.558685	0.0955733	2.15185	5.20379e-13	92.469	83.632	60.016	0	0		#NUM!	0.344493	1.48773	0.00113969	47.167	0.4937	2.31501	2.21536e-07	79.667					0.512925	2.01601	8.48817e-05	52.915	0.447584	3.7405	0.00258517	44.6	0.430727	2.81908	0.000223223	49.518
P47930	200	P47930	P47930	Fos-related antigen 2	Fosl2	sp|P47930|FOSL2_MOUSE Fos-related antigen 2 OS=Mus musculus OX=10090 GN=Fosl2 PE=1 SV=2	0.999999	3.0091e-08	60.3902	6.36778e-136	251.51	223.04	187.85	0.999707	37.8476	3.95809e-55	179.5	0.999999	60.3902	1.59843e-103	223.89	0.999995	53.318	1.78023e-90	216.87	0.999708	36.9651	1.61369e-103	223.81	0.999095	32.0966	6.39402e-46	164.42	0.999161	31.041	3.49216e-62	192.1	0.99948	35.8831	1.66831e-90	217.26	0.999657	36.3497	5.60621e-63	192.58	0.999933	43.4415	5.00499e-69	193.71
P47930	308	P47930	P47930	Fos-related antigen 2	Fosl2	sp|P47930|FOSL2_MOUSE Fos-related antigen 2 OS=Mus musculus OX=10090 GN=Fosl2 PE=1 SV=2	0.252245	0.232168	0	0.00750555	47.088	37.036	47.088					0.252245	0	0.00750555	47.088
P47930	309	P47930	P47930	Fos-related antigen 2	Fosl2	sp|P47930|FOSL2_MOUSE Fos-related antigen 2 OS=Mus musculus OX=10090 GN=Fosl2 PE=1 SV=2	0.252245	0.232266	0	0.00750555	47.088	37.036	47.088					0.252245	0	0.00750555	47.088
P47930	83	P47930	P47930	Fos-related antigen 2	Fosl2	sp|P47930|FOSL2_MOUSE Fos-related antigen 2 OS=Mus musculus OX=10090 GN=Fosl2 PE=1 SV=2	0.552004	0.0981422	2.67457	0.000145084	54.732	51.463	49.199					0.361428	0.2926	0.000909837	46.464	0.352702	0.235327	0.000145084	54.732	0.552004	2.67457	0.000216991	53.482
P47941	107	P47941	P47941	Crk-like protein	Crkl	sp|P47941|CRKL_MOUSE Crk-like protein OS=Mus musculus OX=10090 GN=Crkl PE=1 SV=2	0.375942	0.184149	0.359202	0.000610554	47.728	37.226	47.728					0.375942	0.359202	0.000610554	47.728
P47955	101	P47955	P47955	Large ribosomal subunit protein P1	Rplp1	sp|P47955|RLA1_MOUSE Large ribosomal subunit protein P1 OS=Mus musculus OX=10090 GN=Rplp1 PE=1 SV=1	1	0	202.408	4.74487e-195	279.19	265.79	235.21	1	165.181	7.48288e-69	201.52	1	4.20791	7.18186e-119	242.9	1	119.991	4.74487e-195	279.19	1	213.034	1.09094e-134	250.39	1	57.5917	1.21688e-102	226.56	1	214.49	1.02901e-102	227.57	1	13.2146	1.80132e-90	222.44	1	140.984	1.04158e-36	162.09	1	9.10783	9.92469e-46	171.28
P47955	104	P47955	P47955	Large ribosomal subunit protein P1	Rplp1	sp|P47955|RLA1_MOUSE Large ribosomal subunit protein P1 OS=Mus musculus OX=10090 GN=Rplp1 PE=1 SV=1	1	0	202.408	5.01308e-271	305.54	292.66	235.21	1	165.181	9.29438e-153	256.71	1	4.20791	5.84398e-153	259.22	1	119.991	1.045e-152	254.71	1	213.034	6.86766e-173	265.6	1	57.5917	1.21688e-102	226.56	1	214.49	9.04357e-153	256.89	1	13.2146	1.94181e-117	235.02	1	140.984	4.58346e-173	268.17	1	9.10783	1.30647e-102	227
P48301	260	P48301	P48301	Transcriptional enhancer factor TEF-4	Tead2	sp|P48301|TEAD2_MOUSE Transcriptional enhancer factor TEF-4 OS=Mus musculus OX=10090 GN=Tead2 PE=2 SV=1	0.997812	0.000219101	26.8737	3.549e-36	135.35	127.48	135.35	0.906785	10.1653	5.05768e-05	60.541	0.808923	6.65555	5.98324e-06	77.149	0.983424	18.0089	3.54965e-17	109.41	0.798213	6.24298	8.78809e-06	75.103					0.896288	9.64694	2.21394e-06	79.9	0.759213	5.43505	5.05768e-05	60.541					0.793835	6.32748	5.65913e-05	60.093
P48453	479	P48453	P48453	Serine/threonine-protein phosphatase 2B catalytic subunit beta isoform	Ppp3cb	sp|P48453|PP2BB_MOUSE Serine/threonine-protein phosphatase 2B catalytic subunit beta isoform OS=Mus musculus OX=10090 GN=Ppp3cb PE=1 SV=2	1	0	18.6039	0.0033215	53.995	39.119	53.995																					1	38.6147	0.0486321	42.311	1	18.6039	0.0033215	53.995
P48678	403	P48678	P48678	Prelamin-A/C;Lamin-A/C	Lmna	sp|P48678|LMNA_MOUSE Prelamin-A/C OS=Mus musculus OX=10090 GN=Lmna PE=1 SV=2	0.386124	0.179802	0	0.0200728	41.743	41.743	41.743	0	0		#NUM!	0	0		#NUM!	0	0		#NUM!	0.386124	0	0.0200728	41.743
P48678	404	P48678	P48678	Prelamin-A/C;Lamin-A/C	Lmna	sp|P48678|LMNA_MOUSE Prelamin-A/C OS=Mus musculus OX=10090 GN=Lmna PE=1 SV=2	0.456661	0.150521	2.02521	0.00469652	41.798	25.311	41.798	0	0		#NUM!	0	0		#NUM!	0.456661	2.02521	0.00469652	41.798	0.386124	0	0.0200728	41.743
P48678	570	P48678	P48678	Prelamin-A/C;Lamin-A/C	Lmna	sp|P48678|LMNA_MOUSE Prelamin-A/C OS=Mus musculus OX=10090 GN=Lmna PE=1 SV=2	0.554012	0.0973156	4.24652	7.52028e-66	145.32	136.82	145.32	0.196902	0.300843	6.99506e-06	51.145	0.318732	1.72514	4.22473e-05	57.399	0.554012	4.24652	7.52028e-66	145.32	0.472374	2.95821	4.90278e-27	105.18	0	0		#NUM!	0.427777	1.78771	7.04384e-08	65.3	0.529934	3.86362	8.72678e-43	121.43	0	0		#NUM!
P48678	573	P48678	P48678	Prelamin-A/C;Lamin-A/C	Lmna	sp|P48678|LMNA_MOUSE Prelamin-A/C OS=Mus musculus OX=10090 GN=Lmna PE=1 SV=2	0.99999	5.11868e-07	50.545	0	346.18	324.13	270.21	0.972528	15.5815	3.29015e-31	157.91	0.999561	33.5758	2.15733e-260	309.91	0.999972	45.7451	0	346.18	0.969651	15.0682	1.95149e-38	168.67	0.670617	3.08856	2.07513e-23	149.14	0.99999	50.545	2.25895e-162	270.21	0.999086	30.4293	1.08274e-106	237.05	0.996146	24.7679	2.46163e-38	167.69	0.728796	5.85227	7.10194e-13	130.01
P48678	301	P48678	P48678	Prelamin-A/C;Lamin-A/C	Lmna	sp|P48678|LMNA_MOUSE Prelamin-A/C OS=Mus musculus OX=10090 GN=Lmna PE=1 SV=2	0.776255	0.0378267	5.41019	0.000454266	82.482	70.459	80.975	0.718903	5.07319	0.00654819	60.764	0.776255	5.41019	0.000510429	80.975	0	0		#NUM!	0.688258	3.79439	0.00457306	49.036	0.725188	4.39076	0.0101718	54.964	0.656156	2.82393	0.0011441	66.12	0.607926	2.15222	0.00591771	47.082	0.702298	4.06669	0.00311184	51.487	0.711975	4.21065	0.00229722	56.424
P48678	277	P48678	P48678	Prelamin-A/C;Lamin-A/C	Lmna	sp|P48678|LMNA_MOUSE Prelamin-A/C OS=Mus musculus OX=10090 GN=Lmna PE=1 SV=2	0.960062	0.00503976	13.8093	5.49457e-52	145.64	124.19	126.79	0.815268	6.45111	1.76025e-32	123.09	0.873856	8.41054	3.66012e-24	119.35	0.617061	2.15263	3.69701e-06	78.546	0.936325	11.9126	1.1879e-23	112.65	0.801841	6.07101	9.85522e-33	127	0.960062	13.8093	1.02759e-32	126.79	0.903307	9.71581	7.54191e-12	100.17	0.852788	7.91007	2.89253e-11	96.024	0.830621	6.90621	3.64777e-24	119.36
P48678	390	P48678	P48678	Prelamin-A/C;Lamin-A/C	Lmna	sp|P48678|LMNA_MOUSE Prelamin-A/C OS=Mus musculus OX=10090 GN=Lmna PE=1 SV=2	0.999974	1.7018e-06	45.7984	1.91626e-138	269.33	237.51	141.65	0.996226	24.5344	3.528e-43	206.46	0.999881	39.136	7.77849e-118	253.72	0.999912	40.5688	1.91626e-138	269.33	0.999384	32.4854	1.39606e-54	215.61	0.999974	45.7984	2.72213e-69	232.92	0.999684	34.7603	5.68876e-68	228.7	0.999951	43.1039	7.77849e-118	253.72	0.999347	33.096	1.08337e-83	242.35	0.999834	37.7012	2.36436e-99	243.4
P48678	392	P48678	P48678	Prelamin-A/C;Lamin-A/C	Lmna	sp|P48678|LMNA_MOUSE Prelamin-A/C OS=Mus musculus OX=10090 GN=Lmna PE=1 SV=2	0.990564	0.00106797	20.2332	3.15431e-14	164.6	141.12	146.34	0.957467	13.9366	0.000134974	108.71	0.975113	15.9318	2.69783e-10	143.43	0.97758	16.3932	3.15431e-14	164.6	0.983208	18.0614	0.000254513	105.14	0.973271	15.6362	3.0056e-10	141.65	0.938943	11.8897	2.42385e-10	137.58	0.990564	20.2332	1.8905e-10	146.34	0.903442	11.2484	3.34073e-08	126.09	0.97264	15.5355	2.42385e-10	137.58
P48678	107	P48678	P48678	Prelamin-A/C;Lamin-A/C	Lmna	sp|P48678|LMNA_MOUSE Prelamin-A/C OS=Mus musculus OX=10090 GN=Lmna PE=1 SV=2	1	0	6.58793	0.00913764	43.798	25.434	43.798
P48678	458	P48678	P48678	Prelamin-A/C;Lamin-A/C	Lmna	sp|P48678|LMNA_MOUSE Prelamin-A/C OS=Mus musculus OX=10090 GN=Lmna PE=1 SV=2	1	3.56391e-14	113.768	3.36725e-122	244.67	220.26	244.67	0.999999	61.1388	5.06107e-30	156.17	1	113.768	3.36725e-122	244.67	1	104.762	1.75761e-91	232.17	1	82.7294	1.40342e-42	181.58	0.99998	46.9822	7.70795e-16	136.17	1	73.4765	4.18933e-14	142.95	1	66.1968	1.11464e-41	174.83	0.999987	48.7373	5.31332e-05	101.2	0.998854	29.4024	0.000716972	87.647
P48678	12	P48678	P48678	Prelamin-A/C;Lamin-A/C	Lmna	sp|P48678|LMNA_MOUSE Prelamin-A/C OS=Mus musculus OX=10090 GN=Lmna PE=1 SV=2	0.999866	9.96787e-06	41.5609	1.37737e-05	106.42	85.724	106.42	0.836592	11.9061	0.00338345	62.378	0.997232	29.1116	7.18214e-05	97.797	0.997326	28.3408	0.00373946	87.148	0.998634	31.5243	0.00100643	81.632	0.977519	20.8225	0.000827915	83.692	0.992109	24.0848	0.000140395	92.265	0.999866	41.5609	1.37737e-05	106.42	0.912038	14.5966	0.00313477	63.727	0.952276	17.5332	0.00167798	72.175
P48678	17	P48678	P48678	Prelamin-A/C;Lamin-A/C	Lmna	sp|P48678|LMNA_MOUSE Prelamin-A/C OS=Mus musculus OX=10090 GN=Lmna PE=1 SV=2	0.985937	0.00166189	19.1678	1.12159e-28	167.94	145.36	142.03	0.558238	2.92713	0.000313829	89.624	0.760818	6.73392	8.5757e-05	96.673	0.579484	3.16168	0.00169174	71.98	0.692855	3.68919	1.30437e-05	106.76	0.985937	19.1678	7.22155e-16	142.03	0.933226	12.1542	2.59042e-26	160.79	0.933323	12.1602	1.12159e-28	167.94	0.967255	15.4139	4.51066e-14	137.75	0.784909	7.2024	4.36444e-10	130.72
P48678	18	P48678	P48678	Prelamin-A/C;Lamin-A/C	Lmna	sp|P48678|LMNA_MOUSE Prelamin-A/C OS=Mus musculus OX=10090 GN=Lmna PE=1 SV=2	0.318449	0.209106	0	0.00337805	62.408	51.256	62.408
P48678	22	P48678	P48678	Prelamin-A/C;Lamin-A/C	Lmna	sp|P48678|LMNA_MOUSE Prelamin-A/C OS=Mus musculus OX=10090 GN=Lmna PE=1 SV=2	0.980826	0.00218648	17.1712	1.27749e-97	241.07	202.49	201.97	0.697904	3.72751	2.16949e-26	161.04	0.615849	3.79588	4.49302e-58	211.82	0.701594	3.72313	8.73808e-59	212.69	0.980826	17.1712	2.24597e-48	201.97	0.690408	3.79498	5.01426e-48	200.97	0.702366	3.74968	6.50158e-82	223.03	0.70223	3.77037	1.04246e-68	214.11	0.257938	1.80047	0.0114361	49.089	0.703366	3.74968	1.27749e-97	241.07
P48678	546	P48678	P48678	Prelamin-A/C;Lamin-A/C	Lmna	sp|P48678|LMNA_MOUSE Prelamin-A/C OS=Mus musculus OX=10090 GN=Lmna PE=1 SV=2	0.849504	0.0223643	7.51642	1.7786e-53	151.47	137.16	116.35	0.5	0	6.77797e-08	82.639	0.791088	5.78261	1.53403e-05	69.248	0.819635	6.5747	6.16362e-21	113.6					0	0		#NUM!					0	0		#NUM!	0.5	0	0.00300229	48.759	0.5	0	6.8539e-06	74.274
P48678	633	P48678	P48678	Prelamin-A/C;Lamin-A/C	Lmna	sp|P48678|LMNA_MOUSE Prelamin-A/C OS=Mus musculus OX=10090 GN=Lmna PE=1 SV=2	0.999999	3.12176e-08	61.8353	5.78793e-60	189.59	175.93	189.59	0.986267	20.6999	0.000186792	87.388					0.938105	14.9052	0.00433904	64.275					0.999999	61.8353	5.78793e-60	189.59	0.957314	13.51	3.27402e-13	126.91					0.999766	39.3299	1.12e-34	153.48	0.999776	37.2494	7.86279e-35	156.11
P48678	637	P48678	P48678	Prelamin-A/C;Lamin-A/C	Lmna	sp|P48678|LMNA_MOUSE Prelamin-A/C OS=Mus musculus OX=10090 GN=Lmna PE=1 SV=2	0.996709	0.00035018	27.071	3.82804e-11	116.28	98.655	89.049					0.888864	10.1168	0.000847542	73.928	0.862464	9.22211	0.00189778	62.709	0.950174	14.6108	0.00588926	60.618					0.987421	20.0295	4.45174e-05	92.671	0.99605	24.2296	3.82804e-11	116.28	0.996709	27.071	0.000128919	89.049
P48678	652	P48678	P48678	Prelamin-A/C;Lamin-A/C	Lmna	sp|P48678|LMNA_MOUSE Prelamin-A/C OS=Mus musculus OX=10090 GN=Lmna PE=1 SV=2	0.68768	0.0578458	3.4372	7.14342e-05	100.04	68.963	89.805									0.68768	3.4372	0.000280029	89.805					0.675576	3.22664	0.0020709	88.596													0.499463	0	0.00157494	90.653
P48678	653	P48678	P48678	Prelamin-A/C;Lamin-A/C	Lmna	sp|P48678|LMNA_MOUSE Prelamin-A/C OS=Mus musculus OX=10090 GN=Lmna PE=1 SV=2	0.499984	0.123375	0	7.14342e-05	100.04	68.963	89.189																																	0.499463	0	0.00157494	90.653
P48678	533	P48678	P48678	Prelamin-A/C;Lamin-A/C	Lmna	sp|P48678|LMNA_MOUSE Prelamin-A/C OS=Mus musculus OX=10090 GN=Lmna PE=1 SV=2	0.674034	0.0622478	3.15801	0.00415652	71.344	59.285	66.246									0.674034	3.15801	0.0496213	66.246	0.664556	2.98973	0.00415652	64.244					0.670771	3.12195	0.0210589	61.444					0.658115	2.9337	0.0396342	41.838
P48725	1437	P48725	P48725	Pericentrin	Pcnt	sp|P48725|PCNT_MOUSE Pericentrin OS=Mus musculus OX=10090 GN=Pcnt PE=1 SV=2	1	0	52.7352	5.86406e-09	98.627	85.949	64.266	1	29.2914	7.91103e-07	87.339	0.984201	17.9446	5.86406e-09	98.627	1	52.7352	0.000335539	64.266													0.944432	12.3034	0.00313542	60.207
P48754	686	P48754	P48754	Breast cancer type 1 susceptibility protein homolog	Brca1	sp|P48754|BRCA1_MOUSE Breast cancer type 1 susceptibility protein homolog OS=Mus musculus OX=10090 GN=Brca1 PE=1 SV=3	1	0	27.2893	0.0197118	61.435	41.649	50.354					1	18.1216	0.0197118	61.435	0	0		#NUM!
P49025	2021	P49025	P49025	Citron Rho-interacting kinase	Cit	sp|P49025|CTRO_MOUSE Citron Rho-interacting kinase OS=Mus musculus OX=10090 GN=Cit PE=1 SV=3	0.999831	1.26313e-05	40.7246	0.000891334	64.454	52.535	64.454					0.994944	25.9504	0.00536507	48.314	0.999831	40.7246	0.000891334	64.454									0.99561	26.5663	0.000891334	64.454
P49117	351	P49117	P49117	Nuclear receptor subfamily 2 group C member 2	Nr2c2	sp|P49117|NR2C2_MOUSE Nuclear receptor subfamily 2 group C member 2 OS=Mus musculus OX=10090 GN=Nr2c2 PE=1 SV=1	0.494671	0.131902	0	0.000471306	49.66	34.89	49.66					0.494671	0	0.000471306	49.66													0	0		#NUM!
P49312	308	P49312	P49312	Heterogeneous nuclear ribonucleoprotein A1;Heterogeneous nuclear ribonucleoprotein A1, N-terminally processed	Hnrnpa1	sp|P49312|ROA1_MOUSE Heterogeneous nuclear ribonucleoprotein A1 OS=Mus musculus OX=10090 GN=Hnrnpa1 PE=1 SV=2	0.125775	0.256439	0	0.00127214	60.474	47.848	60.474																									0.125775	0	0.00127214	60.474
P49312	309	P49312	P49312	Heterogeneous nuclear ribonucleoprotein A1;Heterogeneous nuclear ribonucleoprotein A1, N-terminally processed	Hnrnpa1	sp|P49312|ROA1_MOUSE Heterogeneous nuclear ribonucleoprotein A1 OS=Mus musculus OX=10090 GN=Hnrnpa1 PE=1 SV=2	0.125775	0.256326	0	0.00127214	60.474	47.848	60.474																									0.125775	0	0.00127214	60.474
P49312	310	P49312	P49312	Heterogeneous nuclear ribonucleoprotein A1;Heterogeneous nuclear ribonucleoprotein A1, N-terminally processed	Hnrnpa1	sp|P49312|ROA1_MOUSE Heterogeneous nuclear ribonucleoprotein A1 OS=Mus musculus OX=10090 GN=Hnrnpa1 PE=1 SV=2	0.125775	0.256213	0	0.00127214	60.474	47.848	60.474																									0.125775	0	0.00127214	60.474
P49312	311	P49312	P49312	Heterogeneous nuclear ribonucleoprotein A1;Heterogeneous nuclear ribonucleoprotein A1, N-terminally processed	Hnrnpa1	sp|P49312|ROA1_MOUSE Heterogeneous nuclear ribonucleoprotein A1 OS=Mus musculus OX=10090 GN=Hnrnpa1 PE=1 SV=2	0.302543	0.214981	0	4.61028e-06	91.622	79.83	84.375													0.302543	0	8.29643e-05	84.375					0.266686	0	4.61028e-06	91.622	0.125775	0	0.00127214	60.474
P49312	312	P49312	P49312	Heterogeneous nuclear ribonucleoprotein A1;Heterogeneous nuclear ribonucleoprotein A1, N-terminally processed	Hnrnpa1	sp|P49312|ROA1_MOUSE Heterogeneous nuclear ribonucleoprotein A1 OS=Mus musculus OX=10090 GN=Hnrnpa1 PE=1 SV=2	0.302543	0.214885	0	4.61028e-06	91.622	79.83	84.375													0.302543	0	8.29643e-05	84.375					0.266686	0	4.61028e-06	91.622	0.125775	0	0.00127214	60.474	0.247833	2.87055	4.86143e-05	81.594
P49312	313	P49312	P49312	Heterogeneous nuclear ribonucleoprotein A1;Heterogeneous nuclear ribonucleoprotein A1, N-terminally processed	Hnrnpa1	sp|P49312|ROA1_MOUSE Heterogeneous nuclear ribonucleoprotein A1 OS=Mus musculus OX=10090 GN=Hnrnpa1 PE=1 SV=2	0.125775	0.256101	0	0.00127214	60.474	47.848	60.474																									0.125775	0	0.00127214	60.474
[truncated: 4,551 more rows]
[truncated: 212 more columns]

## Sheet: phosPIR phospho
Protein	Protein.names	Gene.names	Amino.acid	Position	Sequence.window	Intensity.A1	Intensity.A2	Intensity.A3	Intensity.A4	Intensity.C1	Intensity.C2	Intensity.C3	Intensity.C4	Intensity.G1	Intensity.G2	Intensity.G3	Intensity.G4	Intensity.S1	Intensity.S2	Intensity.S3	Intensity.S4	Comparison1_FoldChange	StandardErrorofMean_Comparison1	Comparison1_T-test_Pvalue	Comparison1_T-test_FDR	Comparison2_FoldChange	StandardErrorofMean_Comparison2	Comparison2_T-test_Pvalue	Comparison2_T-test_FDR	Comparison3_FoldChange	StandardErrorofMean_Comparison3	Comparison3_T-test_Pvalue	Comparison3_T-test_FDR
[truncated: 1,433 more rows]

[truncated: 7 more sheets: proteinGroups, phosPIR proteome, GvsC KinSwingR, AvsC KinSwingR, SvsC KinSwingR, ProteomeDiscoverer, PDmethodology]
