# Supplementary material for: Guanine is an inhibitor of c-Jun terminal kinases
Source: Research Square preprint supplement (doi:10.21203/rs.3.rs-6521885/v1), 2025-05-30
Supplement: Supplementary file 2 [file fa8647d6be42aa87070daa4a.docx]

**Guanine is an inhibitor of c-Jun terminal kinases**

Jessica Treeby1*, Sherihan El-Sayed2,3, Samuel Morgan1, Sophie Maddock1, George Taylor4, Stacey Warwood4, Julian Selley4, David Knight4, Benjamin Saer1, Richard A. Bryce2, Jean-Michel Fustin1*

1The University of Manchester; Faculty of Biology, Medicine and Health; Centre for Biological Timing

2 Division of Pharmacy and Optometry, School of Health Sciences, Manchester Academic Health Sciences Centre, University of Manchester, Oxford Road, M13 9PT, UK.

3 Department of Medicinal Chemistry, Faculty of Pharmacy, Zagazig University, Zagazig, 44519, Egypt.

4 The University of Manchester, FBMH Platform Sciences, Enabling Technologies & Infrastructure, BioMS

Correspondence: Jessica.Treeby@postgrad.manchester.ac.uk, Jean-Michel.Fustin@Manchester.ac.uk

List of material included:

Supporting data 1

Tab 1: Phospho (STY)Sites output from MaxQuant.

Tab 2: PhosPIR output, using Phospho (STY)Sites as input

Tab 3: ProteinGroups output from MaxQuant

Tab 4: PhosPIR output, using ProteinGroups values as input

Tab 5: Guanine vs Control output of KinSwingR

Tab 6: Adenine vs Control output of KinSwingR

Tab 7: SP600125 vs Control output of KinSwingR

Tab 8: output from Proteome Discoverer

Tab 9: PS methodology and settings applied to Proteome Discoverer

Supporting method 1: xml settings file used with MaxQuant
